# Supplementary material for: The Landscape of Accessible Chromatin during Yak Adipocyte Differentiation
Source: MDPI journal article supplement (doi:10.3390/ijms23179960), 2022-09-01
Supplement: s1 [file s1]

Table S1 The information of filter reads

| Sample  | Clean_Reads_Num | HQ_Clean_Reads_Num(%) | Read_length | adapter(%)   | low_quality(%) | polyA(%) | N(%)         |
|---------|-----------------|-----------------------|-------------|--------------|----------------|----------|--------------|
| Pread-1 | 191299602       | 190718464(99.7%)      | 150 + 150   | 63482(0.03%) | 1035312(0.27%) | 0(0.0%)  | 0(0.0%)      |
| Pread-2 | 177513582       | 176895424(99.65%)     | 150 + 150   | 80738(0.05%) | 1074836(0.3%)  | 0(0.0%)  | 4(0.0%)      |
| Pread-3 | 134656446       | 134135648(99.61%)     | 150 + 150   | 70008(0.05%) | 856180(0.32%)  | 0(0.0%)  | 45400(0.02%) |
| Ad-1    | 167789856       | 167236446(99.67%)     | 150 + 150   | 61744(0.04%) | 983320(0.29%)  | 0(0.0%)  | 12(0.0%)     |
| Ad-2    | 144408884       | 143912464(99.66%)     | 150 + 150   | 63914(0.04%) | 816016(0.28%)  | 0(0.0%)  | 48996(0.02%) |
| Ad-3    | 168196328       | 167701632(99.71%)     | 150 + 150   | 68376(0.04%) | 852636(0.25%)  | 0(0.0%)  | 4(0.0%)      |

Table S2 The distribution of peaks among different genomic regions

| Area              | Pread       | Ad          |
|-------------------|-------------|-------------|
| peakCount         | 15045       | 7683        |
| promoter          | 2553-16.97% | 1321-17.19% |
| 5'UTR             | 622-4.13%   | 315-4.10%   |
| 3'UTR             | 59-0.39%    | 35-0.46%    |
| 1st_exon          | 311-2.07%   | 138-1.80%   |
| other_exon        | 138-0.92%   | 61-0.79%    |
| 1st_intron        | 1688-11.22% | 740-9.63%   |
| other_intron      | 2897-19.26% | 1261-16.41% |
| downstream        | 183-1.22%   | 90-1.17%    |
| distal_intergenic | 6594-43.83% | 3722-48.44% |
| unknown           | 0-0.00%     | 0-0.00%     |

Table S9 Primer information

| Gene           | Primer pair sequences (5'-3') | Tm (°C) |
|----------------|-------------------------------|---------|
| C/EBP $\alpha$ | F: GGCAACGACTTTGACTACCCG      | 61.8    |
|                | R: CACCTTCTGCTGCGTCTCCAC      |         |
| PPAR $\gamma$  | F: CATTTCCACTCCGCACTA         | 60.3    |
|                | R: GGGATACAGGCTCCACTT         |         |
| FABP4          | F: CCATTAAATCCGAAAGCA         | 59.2    |
|                | R: CACATTCCAGCACCATCT         |         |
| SREBF1         | F: TCGACTACATCCGCTTCCTT       | 59.2    |
|                | R: CCACCACCTCTGGCTTCAT        |         |
| EGR1           | F: GAGCGATGAACGCAAGAGG        | 61.8    |
|                | R: GCGATGGGTATGAGGTGGTA       |         |
| CD36           | F: GCAAAGAGGTCCTTACAC         | 61.8    |
|                | R: ACAGCCAGGTTGAGAATG         |         |
| IGFBP3         | F: AAGACACGCTGAACCACCT        | 61.8    |
|                | R: GGCTGCCCCGTACTTATCCA       |         |
| PML            | F: GCCGTGAACCAGGAAAG          | 61.8    |
|                | R: GGCAGGGTGGCTAAGAA          |         |
| COTL1          | F: CGAGCAGGGAGCGGAATA         | 61.8    |

|        |                                                                          |      |
|--------|--------------------------------------------------------------------------|------|
| METRNL | R: GATGAGGGCGAACTTGGA<br>F: CGACGCCACAGCAAGACA<br>R: GATGGAGCCTCGGACAACA | 61.8 |
|--------|--------------------------------------------------------------------------|------|
