# Supplementary material for: The Landscape of Accessible Chromatin during Yak Adipocyte Differentiation
Source: Int J Mol Sci. 2022 Sep 1;23(17):9960. doi: 10.3390/ijms23179960 (PMC9456067; doi:10.3390/ijms23179960)
Supplement: Supplementary file 1 [file ijms-23-09960-s001.zip]

Archive with 8 entries (8 files):
- Supplementary Fingure S1+S2+S3+S4+S5.pdf
- Supplementary Table S1+S2+S9.pdf
- Supplementary Table S3.xls
- Supplementary Table S4.xls
- Supplementary Table S5.xls
- Supplementary Table S6.xlsx
- Supplementary Table S7.xls
- Supplementary Table S8.xlsx
