# Supplementary material for: The Landscape of Accessible Chromatin during Yak Adipocyte Differentiation
Source: Int J Mol Sci. 2022 Sep 1;23(17):9960. doi: 10.3390/ijms23179960 (PMC9456067; doi:10.3390/ijms23179960)
Supplement: Supplementary file 1 [file ijms-23-09960-s001.zip › Supplementary Table S3.xls]

peak_name	Chr	Start	End	p-value	FDR	Pread-1_reads	Pread-2_reads	Pread-3_reads	Ad-1_reads	Ad-2_reads	Ad-3_reads	Pread-1_rpkm	Pread-2_rpkm	Pread-3_rpkm	Ad-1_rpkm	Ad-2_rpkm	Ad-3_rpkm	Pread_mean	Ad_mean	rpkm_log2fc	annotation	anno_geneStart	anno_geneEnd	anno_geneLength	anno_geneStrand	anno_GeneId	anno_TranscriptId	dist_geneStart	dist_geneEnd	dist_geneLength	dist_geneStrand	dist_geneId	dist_transcriptId	distToTSS	Symbol	Description	KEGG_A_class	KEGG_B_class	Pathway	K_ID	GO_Component	GO_Function	GO_Process
MergePeak_11547	3	21777332	21777859	7.87e-06	0.0464	104	75	41	35	25	19	3.600000	4.450000	3.890000	1.560000	0.960000	1.080000	3.980000	1.200000	-1.729734	Intron (ENSBGRT00000003588/ENSBGRG00000001920, intron 1 of 12)	21761182	21781624	20443	-	ENSBGRG00000001920	ENSBGRT00000003588	21761182	21781624	20443	-	ENSBGRG00000001920	ENSBGRT00000003588	4029	PI4KB	phosphatidylinositol 4-kinase beta [Source:HGNC Symbol;Acc:HGNC:8984]	Metabolism;Environmental Information Processing;Metabolism	Global and overview maps;Signal transduction;Carbohydrate metabolism	ko01100//Metabolic pathways;ko04070//Phosphatidylinositol signaling system;ko00562//Inositol phosphate metabolism	K19801;K19801;K19801	-	GO:0016301//kinase activity	GO:0046854//phosphatidylinositol phosphorylation;GO:0048015//phosphatidylinositol-mediated signaling
MergePeak_13783	6	516051	516721	4.03e-05	0.0519	125	89	91	61	40	33	3.400000	4.160000	6.800000	2.140000	1.210000	1.480000	4.790000	1.610000	-1.572965	Promoter (<=1kb)	514481	516142	1662	-	ENSBGRG00000006619	ENSBGRT00000012187	514481	516142	1662	-	ENSBGRG00000006619	ENSBGRT00000012187	-244	CCDC96	XP_005906320.1 PREDICTED: coiled-coil domain-containing protein 96 [Bos mutus]	-	-	-	-	-	-	-
MergePeak_11377	3	3190792	3191100	4.4e-05	0.0519	86	49	42	26	24	19	5.090000	4.980000	6.820000	1.990000	1.580000	1.850000	5.630000	1.810000	-1.637145	Promoter (1-2kb)	3180923	3189839	8917	-	ENSBGRG00000024887	ENSBGRT00000045937	3180923	3189839	8917	-	ENSBGRG00000024887	ENSBGRT00000045937	-1107	NES	nestin [Source:HGNC Symbol;Acc:HGNC:7756]	-	-	-	-	GO:0005737//cytoplasm;GO:0005882//intermediate filament;GO:0045111//intermediate filament cytoskeleton	GO:0019215//intermediate filament binding	GO:0000086//G2/M transition of mitotic cell cycle;GO:0007399//nervous system development;GO:0032091//negative regulation of protein binding;GO:0043086//negative regulation of catalytic activity;GO:0043524//negative regulation of neuron apoptotic process;GO:0048858//cell projection morphogenesis;GO:0072089//stem cell proliferation
MergePeak_9780	25	23699020	23700233	7.02e-05	0.0625	186	95	109	55	74	65	2.800000	2.450000	4.500000	1.070000	1.240000	1.610000	3.250000	1.310000	-1.310873	Promoter (<=1kb)	23699638	23706611	6974	+	ENSBGRG00000025373	ENSBGRT00000046920	23699638	23706611	6974	+	ENSBGRG00000025373	ENSBGRT00000046920	-12	SFXN3	sideroflexin 3 [Source:HGNC Symbol;Acc:HGNC:16087]	-	-	-	-	GO:0005739//mitochondrion;GO:0016020//membrane	GO:0015075//ion transmembrane transporter activity	GO:0006811//ion transport;GO:0055085//transmembrane transport
MergePeak_15403	8	18788666	18789673	9.68e-05	0.0625	242	167	132	123	93	101	4.380000	5.190000	6.560000	2.880000	1.880000	3.010000	5.380000	2.590000	-1.054654	Promoter (<=1kb)	18789725	18802265	12541	+	ENSBGRG00000000517	ENSBGRT00000000999	18789725	18802265	12541	+	ENSBGRG00000000517	ENSBGRT00000000999	-556	KHSRP	KH-type splicing regulatory protein [Source:HGNC Symbol;Acc:HGNC:6316]	-	-	-	-	GO:0005654//nucleoplasm;GO:0010494//cytoplasmic stress granule	GO:0003676//nucleic acid binding;GO:0003723//RNA binding;GO:0003729//mRNA binding;GO:0035925//mRNA 3'-UTR AU-rich region binding	GO:0006355//regulation of transcription, DNA-templated;GO:0006402//mRNA catabolic process;GO:0010586//miRNA metabolic process;GO:0010989//negative regulation of low-density lipoprotein particle clearance;GO:0043488//regulation of mRNA stability;GO:0045019//negative regulation of nitric oxide biosynthetic process;GO:0061014//positive regulation of mRNA catabolic process;GO:0061158//3'-UTR-mediated…
MergePeak_4289	15	64037720	64038252	0.000103	0.0625	94	49	32	28	20	19	3.220000	2.880000	3.010000	1.240000	0.760000	1.070000	3.040000	1.020000	-1.575502	Intron (ENSBGRT00000032188/ENSBGRG00000017543, intron 1 of 4)	64034386	64051859	17474	+	ENSBGRG00000017543	ENSBGRT00000032188	64034386	64051859	17474	+	ENSBGRG00000017543	ENSBGRT00000032188	3600	SPRYD7	SPRY domain containing 7 [Source:HGNC Symbol;Acc:HGNC:14297]	-	-	-	-	-	GO:0005515//protein binding	-
MergePeak_15423	8	20319922	20320525	0.000105	0.0625	100	71	69	34	27	39	3.020000	3.690000	5.730000	1.330000	0.910000	1.940000	4.150000	1.390000	-1.578026	5' UTR	20317618	20320905	3288	-	ENSBGRG00000013969	ENSBGRT00000025644	20317618	20320905	3288	-	ENSBGRG00000013969	ENSBGRT00000025644	682	FEM1A	fem-1 homolog A [Source:HGNC Symbol;Acc:HGNC:16934]	-	-	-	-	-	GO:0005515//protein binding;GO:0031867//EP4 subtype prostaglandin E2 receptor binding	GO:0050728//negative regulation of inflammatory response
MergePeak_4781	16	77583495	77584141	0.00011	0.0625	93	61	45	38	21	22	2.630000	2.960000	3.490000	1.390000	0.660000	1.020000	3.030000	1.020000	-1.570749	Promoter (1-2kb)	77585717	77612343	26627	+	ENSBGRG00000025006	ENSBGRT00000046199	77585717	77612248	26532	+	ENSBGRG00000025006	ENSBGRT00000046240	-1899	SMTN	smoothelin [Source:HGNC Symbol;Acc:HGNC:11126]	-	-	-	-	-	GO:0005515//protein binding	GO:0003085//negative regulation of systemic arterial blood pressure;GO:0060452//positive regulation of cardiac muscle contraction
MergePeak_2024	11	70668317	70668908	0.000117	0.0625	83	63	64	26	32	32	2.560000	3.340000	5.420000	1.040000	1.100000	1.620000	3.770000	1.250000	-1.592636	Intron (ENSBGRT00000012699/ENSBGRG00000006595, intron 1 of 19)	70598259	70715092	116834	-	ENSBGRG00000006595	ENSBGRT00000012699	70598259	70715092	116834	-	ENSBGRG00000006595	ENSBGRT00000012699	46480	ACTN1	actinin alpha 1 [Source:HGNC Symbol;Acc:HGNC:163]	Human Diseases;Human Diseases;Human Diseases;Cellular Processes;Cellular Processes;Cellular Processes;Organismal Systems;Human Diseases;Cellular Processes	Infectious diseases;Immune diseases;Cancers;Cell motility;Cellular community - eukaryotes;Cellular community - eukaryotes;Immune system;Infectious diseases;Cellular community - eukaryotes	ko05131//Shigellosis;ko05322//Systemic lupus erythematosus;ko05203//Viral carcinogenesis;ko04810//Regulation of actin cytoskeleton;ko04510//Focal adhesion;ko04530//Tight junction;ko04670//Leukocyte transendothelial migration;ko05146//Amoebiasis;ko04520//Adherens junction	K05699;K05699;K05699;K05699;K05699;K05699;K05699;K05699;K05699	GO:0001725//stress fiber;GO:0001726//ruffle;GO:0005737//cytoplasm;GO:0005884//actin filament;GO:0005903//brush border;GO:0005911//cell-cell junction;GO:0005916//fascia adherens;GO:0005925//focal adhesion;GO:0030017//sarcomere;GO:0030018//Z disc;GO:0042995//cell projection;GO:0098978//glutamatergic synapse	GO:0003725//double-stranded RNA binding;GO:0005178//integrin binding;GO:0005509//calcium ion binding;GO:0005515//protein binding;GO:0017166//vinculin binding;GO:0030374//nuclear receptor transcription coactivator activity;GO:0042803//protein homodimerization activity;GO:0044325//ion channel binding;GO:0051015//actin filament binding;GO:0099186//structural constituent of postsynapse	GO:0007015//actin filament organization;GO:0030220//platelet formation;GO:0036344//platelet morphogenesis;GO:0048041//focal adhesion assembly;GO:0051017//actin filament bundle assembly;GO:0051271//negative regulation of cellular component movement;GO:0051639//actin filament network formation;GO:0051764//actin crosslink formation
MergePeak_9758	25	22295783	22296595	0.00015	0.0633	155	100	124	71	53	64	3.480000	3.850000	7.640000	2.060000	1.330000	2.360000	4.990000	1.920000	-1.377934	Promoter (<=1kb)	22285159	22295745	10587	-	ENSBGRG00000022344	ENSBGRT00000041286	22285159	22295745	10587	-	ENSBGRG00000022344	ENSBGRT00000041286	-444	SLC25A28	solute carrier family 25 member 28 [Source:HGNC Symbol;Acc:HGNC:23472]	-	-	-	-	GO:0005739//mitochondrion	-	-
MergePeak_10703	27	36895896	36896503	0.000178	0.0633	83	66	71	43	31	25	2.490000	3.400000	5.850000	1.670000	1.040000	1.230000	3.910000	1.310000	-1.577602	3' UTR	36863764	36899562	35799	+	ENSBGRG00000026210	ENSBGRT00000048541	36835347	36899562	64216	+	ENSBGRG00000026210	ENSBGRT00000048508	60852	TSPAN14	tetraspanin 14 [Source:HGNC Symbol;Acc:HGNC:23303]	-	-	-	-	GO:0005886//plasma membrane;GO:0009986//cell surface;GO:0016021//integral component of membrane;GO:0097197//tetraspanin-enriched microdomain	GO:0019899//enzyme binding	GO:0045747//positive regulation of Notch signaling pathway;GO:0051604//protein maturation;GO:0072659//protein localization to plasma membrane
MergePeak_3485	14	26340614	26341295	0.000187	0.0633	135	82	79	59	49	41	3.610000	3.770000	5.800000	2.040000	1.460000	1.800000	4.390000	1.770000	-1.310472	5' UTR	26340795	26365431	24637	+	ENSBGRG00000006812	ENSBGRT00000012576	26340795	26362846	22052	+	ENSBGRG00000006812	ENSBGRT00000012714	159	TFB2M	transcription factor B2, mitochondrial [Source:HGNC Symbol;Acc:HGNC:18559]	-	-	-	-	GO:0005739//mitochondrion;GO:0005759//mitochondrial matrix;GO:0042645//mitochondrial nucleoid	GO:0000179//rRNA (adenine-N6,N6-)-dimethyltransferase activity;GO:0003700//DNA-binding transcription factor activity;GO:0003712//transcription coregulator activity;GO:0008649//rRNA methyltransferase activity	GO:0000154//rRNA modification;GO:0006355//regulation of transcription, DNA-templated;GO:0006390//mitochondrial transcription;GO:0006391//transcription initiation from mitochondrial promoter;GO:0031167//rRNA methylation;GO:0045893//positive regulation of transcription, DNA-templated
MergePeak_8578	22	13464705	13465531	0.00019	0.0633	229	89	113	80	75	71	5.060000	3.370000	6.850000	2.280000	1.850000	2.580000	5.090000	2.240000	-1.184167	Promoter (<=1kb)	13455033	13464740	9708	-	ENSBGRG00000025851	ENSBGRT00000047798	13455033	13464740	9708	-	ENSBGRG00000025851	ENSBGRT00000047798	-378	RRP9	ribosomal RNA processing 9, U3 small nucleolar RNA binding protein [Source:HGNC Symbol;Acc:HGNC:16829]	-	-	-	-	GO:0005730//nucleolus;GO:0031428//box C/D snoRNP complex	GO:0005515//protein binding;GO:0034511//U3 snoRNA binding	GO:0006364//rRNA processing
MergePeak_14944	7	71698726	71699309	0.000193	0.0633	100	47	68	29	23	34	3.130000	2.520000	5.840000	1.170000	0.800000	1.750000	3.830000	1.240000	-1.627004	Promoter (<=1kb)	71699087	71787429	88343	+	ENSBGRG00000022945	ENSBGRT00000042513	71699087	71787429	88343	+	ENSBGRG00000022945	ENSBGRT00000042513	-70	CEMIP2	cell migration inducing hyaluronidase 2 [Source:HGNC Symbol;Acc:HGNC:11869]	-	-	-	-	GO:0005886//plasma membrane;GO:0005887//integral component of plasma membrane;GO:0043231//intracellular membrane-bounded organelle	GO:0004415//hyalurononglucosaminidase activity;GO:0005509//calcium ion binding	GO:0030214//hyaluronan catabolic process
MergePeak_16607	9	71370909	71371263	0.000214	0.0666	68	50	51	33	9	18	3.500000	4.420000	7.210000	2.200000	0.520000	1.520000	5.040000	1.410000	-1.837729	Intron (ENSBGRT00000008649/ENSBGRG00000004693, intron 2 of 2)	71346756	71398212	51457	-	ENSBGRG00000004693	ENSBGRT00000008649	71346756	71398212	51457	-	ENSBGRG00000004693	ENSBGRT00000008649	27126	ATOH8	atonal bHLH transcription factor 8 [Source:HGNC Symbol;Acc:HGNC:24126]	-	-	-	-	GO:0005634//nucleus;GO:0005654//nucleoplasm;GO:0005737//cytoplasm	GO:0003700//DNA-binding transcription factor activity;GO:0008134//transcription factor binding;GO:0033613//activating transcription factor binding;GO:0046983//protein dimerization activity;GO:0070888//E-box binding	GO:0001704//formation of primary germ layer;GO:0001937//negative regulation of endothelial cell proliferation;GO:0006355//regulation of transcription, DNA-templated;GO:0010595//positive regulation of endothelial cell migration;GO:0010629//negative regulation of gene expression;GO:0030154//cell differentiation;GO:0035148//tube formation;GO:0045603//positive regulation of endothelial cell different…
MergePeak_393	1	80998246	80999257	0.000268	0.0699	156	79	80	54	48	54	2.810000	2.450000	3.960000	1.260000	0.970000	1.600000	3.070000	1.280000	-1.262095	Intron (ENSBGRT00000000612/ENSBGRG00000000376, intron 1 of 2)	80975689	81099537	123849	+	ENSBGRG00000000376	ENSBGRT00000000612	80975689	81099537	123849	+	ENSBGRG00000000376	ENSBGRT00000000612	23062	MB21D2	Mab-21 domain containing 2 [Source:HGNC Symbol;Acc:HGNC:30438]	-	-	-	-	-	GO:0044877//protein-containing complex binding	-
MergePeak_12152	3	120776372	120776883	0.000316	0.0699	108	59	54	43	38	26	3.850000	3.610000	5.290000	1.980000	1.510000	1.520000	4.250000	1.670000	-1.347615	Promoter (<=1kb)	120776802	120792047	15246	+	ENSBGRG00000011649	ENSBGRT00000021422	120776802	120785287	8486	+	ENSBGRG00000011649	ENSBGRT00000021584	-175	SFPQ	splicing factor proline and glutamine rich [Source:HGNC Symbol;Acc:HGNC:10774]	-	-	-	-	GO:0000785//chromatin;GO:0005634//nucleus;GO:0005654//nucleoplasm;GO:0016363//nuclear matrix;GO:0042382//paraspeckles;GO:0090575//RNA polymerase II transcription factor complex	GO:0000976//transcription regulatory region sequence-specific DNA binding;GO:0000978//RNA polymerase II proximal promoter sequence-specific DNA binding;GO:0003676//nucleic acid binding;GO:0003677//DNA binding;GO:0003682//chromatin binding;GO:0042803//protein homodimerization activity;GO:0042826//histone deacetylase binding;GO:0044212//transcription regulatory region DNA binding;GO:0070888//E-box …	GO:0000122//negative regulation of transcription by RNA polymerase II;GO:0000380//alternative mRNA splicing, via spliceosome;GO:0000724//double-strand break repair via homologous recombination;GO:0002218//activation of innate immune response;GO:0006974//cellular response to DNA damage stimulus;GO:0042752//regulation of circadian rhythm;GO:0042754//negative regulation of circadian rhythm;GO:004587…
MergePeak_16270	9	19858726	19859805	0.000346	0.0699	126	70	77	47	42	45	2.130000	2.030000	3.570000	1.030000	0.790000	1.250000	2.580000	1.020000	-1.338802	Intron (ENSBGRT00000049677/ENSBGRG00000026792, intron 8 of 17)	19838804	19879785	40982	+	ENSBGRG00000026792	ENSBGRT00000049677	19838804	19879785	40982	+	ENSBGRG00000026792	ENSBGRT00000049677	20461	NCAPH	non-SMC condensin I complex subunit H [Source:HGNC Symbol;Acc:HGNC:1112]	-	-	-	-	GO:0000796//condensin complex;GO:0005654//nucleoplasm;GO:0005829//cytosol	-	GO:0007076//mitotic chromosome condensation
MergePeak_13262	5	57182932	57184141	0.00037	0.0699	120	88	59	38	49	47	1.810000	2.280000	2.440000	0.740000	0.820000	1.170000	2.180000	0.910000	-1.260390	Exon (ENSBGRT00000033175/ENSBGRG00000018023, exon 1 of 13)	57183066	57266277	83212	+	ENSBGRG00000018023	ENSBGRT00000033175	57183066	57266277	83212	+	ENSBGRG00000018023	ENSBGRT00000033175	470	LEMD3	LEM domain containing 3 [Source:HGNC Symbol;Acc:HGNC:28887]	-	-	-	-	GO:0005637//nuclear inner membrane;GO:0016021//integral component of membrane;GO:0031965//nuclear membrane	GO:0003676//nucleic acid binding	GO:0001525//angiogenesis;GO:0006997//nucleus organization;GO:0030512//negative regulation of transforming growth factor beta receptor signaling pathway;GO:0030514//negative regulation of BMP signaling pathway;GO:0032926//negative regulation of activin receptor signaling pathway;GO:1902531//regulation of intracellular signal transduction
MergePeak_8030	20	64984590	64985315	0.000381	0.0699	148	87	101	59	74	53	3.720000	3.760000	6.970000	1.920000	2.080000	2.190000	4.820000	2.060000	-1.226389	Promoter (<=1kb)	64974613	64984401	9789	-	ENSBGRG00000017191	ENSBGRT00000031723	64974613	64984401	9789	-	ENSBGRG00000017191	ENSBGRT00000031723	-551	GSK3A	XP_027371474.1 glycogen synthase kinase-3 alpha [Bos indicus x Bos taurus]	Human Diseases;Human Diseases;Organismal Systems;Organismal Systems	Infectious diseases;Endocrine and metabolic diseases;Immune system;Nervous system	ko05131//Shigellosis;ko04932//Non-alcoholic fatty liver disease (NAFLD);ko04062//Chemokine signaling pathway;ko04728//Dopaminergic synapse	K08822;K08822;K08822;K08822	-	GO:0004672//protein kinase activity;GO:0004674//protein serine/threonine kinase activity;GO:0005102//signaling receptor binding;GO:0005524//ATP binding	GO:0003073//regulation of systemic arterial blood pressure;GO:0003214//cardiac left ventricle morphogenesis;GO:0006349//regulation of gene expression by genetic imprinting;GO:0006468//protein phosphorylation;GO:0008286//insulin receptor signaling pathway;GO:0010508//positive regulation of autophagy;GO:0010628//positive regulation of gene expression;GO:0010800//positive regulation of peptidyl-thre…
MergePeak_3650	14	44302589	44303161	0.000382	0.0699	100	48	54	34	19	31	3.190000	2.630000	4.720000	1.400000	0.680000	1.620000	3.510000	1.230000	-1.512813	5' UTR	44301958	44313900	11943	+	ENSBGRG00000014711	ENSBGRT00000027116	44301958	44313900	11943	+	ENSBGRG00000014711	ENSBGRT00000027116	917	KLHL21	kelch like family member 21 [Source:HGNC Symbol;Acc:HGNC:29041]	-	-	-	-	GO:0005827//polar microtubule;GO:0031463//Cul3-RING ubiquitin ligase complex	GO:0004842//ubiquitin-protein transferase activity;GO:0005515//protein binding;GO:0097602//cullin family protein binding	GO:0016567//protein ubiquitination;GO:0032465//regulation of cytokinesis;GO:0035853//chromosome passenger complex localization to spindle midzone
MergePeak_16676	9	86454270	86455016	0.000402	0.0699	99	52	70	35	28	36	2.420000	2.180000	4.700000	1.110000	0.760000	1.450000	3.100000	1.110000	-1.481709	Intron (ENSBGRT00000021252/ENSBGRG00000011678, intron 1 of 2)	86430414	86559041	128628	-	ENSBGRG00000011678	ENSBGRT00000021252	86430414	86559041	128628	-	ENSBGRG00000011678	ENSBGRT00000021252	104398	SERTAD2	SERTA domain containing 2 [Source:HGNC Symbol;Acc:HGNC:30784]	-	-	-	-	GO:0005634//nucleus;GO:0005654//nucleoplasm;GO:0005737//cytoplasm;GO:0005829//cytosol	GO:0003713//transcription coactivator activity	GO:0030308//negative regulation of cell growth;GO:0045893//positive regulation of transcription, DNA-templated
MergePeak_610	1	121762275	121762940	0.000403	0.0699	123	107	59	57	65	33	3.370000	5.040000	4.440000	2.020000	1.990000	1.490000	4.280000	1.830000	-1.225767	Promoter (<=1kb)	121763197	121783645	20449	+	ENSBGRG00000007545	ENSBGRT00000013909	121763197	121783645	20449	+	ENSBGRG00000007545	ENSBGRT00000013909	-590	Slc33a1	ELR55758.1 Acetyl-coenzyme A transporter 1, partial [Bos mutus]	Metabolism;Metabolism	Global and overview maps;Glycan biosynthesis and metabolism	ko01100//Metabolic pathways;ko00604//Glycosphingolipid biosynthesis - ganglio series	K03372;K03372	GO:0016020//membrane;GO:0016021//integral component of membrane	GO:0008521//acetyl-CoA transmembrane transporter activity	-
MergePeak_11741	3	53409287	53409850	0.000438	0.0699	98	62	68	39	29	38	3.170000	3.450000	6.040000	1.630000	1.050000	2.020000	4.220000	1.570000	-1.426478	Promoter (<=1kb)	53321124	53409312	88189	-	ENSBGRG00000000245	ENSBGRT00000000413	53348906	53409312	60407	-	ENSBGRG00000000245	ENSBGRT00000000439	-256	ABCD3	ATP binding cassette subfamily D member 3 [Source:HGNC Symbol;Acc:HGNC:67]	Cellular Processes;Environmental Information Processing	Transport and catabolism;Membrane transport	ko04146//Peroxisome;ko02010//ABC transporters	K05677;K05677	GO:0005777//peroxisome;GO:0005778//peroxisomal membrane;GO:0005782//peroxisomal matrix;GO:0016021//integral component of membrane;GO:0043231//intracellular membrane-bounded organelle	GO:0005324//long-chain fatty acid transporter activity;GO:0005524//ATP binding;GO:0016887//ATPase activity;GO:0042626//ATPase activity, coupled to transmembrane movement of substances;GO:0042803//protein homodimerization activity	GO:0006633//fatty acid biosynthetic process;GO:0006635//fatty acid beta-oxidation;GO:0007031//peroxisome organization;GO:0015910//peroxisomal long-chain fatty acid import;GO:0042760//very long-chain fatty acid catabolic process;GO:0055085//transmembrane transport
MergePeak_12787	4	99459994	99460422	0.000441	0.0699	97	48	46	39	33	15	4.130000	3.510000	5.380000	2.150000	1.570000	1.050000	4.340000	1.590000	-1.448668	Intron (ENSBGRT00000002748/ENSBGRG00000001496, intron 5 of 5)	99234158	99547785	313628	+	ENSBGRG00000001496	ENSBGRT00000002748	99234158	99547785	313628	+	ENSBGRG00000001496	ENSBGRT00000002748	226050	MACC1	MET transcriptional regulator MACC1 [Source:HGNC Symbol;Acc:HGNC:30215]	-	-	-	-	GO:0005739//mitochondrion	GO:0000977//RNA polymerase II regulatory region sequence-specific DNA binding;GO:0001228//DNA-binding transcription activator activity, RNA polymerase II-specific	GO:0045944//positive regulation of transcription by RNA polymerase II
MergePeak_8569	22	13034113	13034671	0.00045	0.0699	97	54	59	38	40	26	3.170000	3.030000	5.290000	1.600000	1.460000	1.400000	3.830000	1.490000	-1.362032	Promoter (<=1kb)	13034483	13039061	4579	+	ENSBGRG00000025630	ENSBGRT00000047390	13034483	13039061	4579	+	ENSBGRG00000025630	ENSBGRT00000047390	-91	MANF	mesencephalic astrocyte derived neurotrophic factor [Source:HGNC Symbol;Acc:HGNC:15461]	-	-	-	-	-	-	-
MergePeak_923	10	833515	834630	0.000451	0.0699	138	57	69	54	46	29	2.260000	1.600000	3.100000	1.140000	0.840000	0.780000	2.320000	0.920000	-1.334419	Intron (ENSBGRT00000033399/ENSBGRG00000018178, intron 7 of 7)	748069	1224887	476819	-	ENSBGRG00000018178	ENSBGRT00000033399	748069	1224887	476819	-	ENSBGRG00000018178	ENSBGRT00000033399	390815	UST	uronyl 2-sulfotransferase [Source:HGNC Symbol;Acc:HGNC:17223]	Metabolism	Glycan biosynthesis and metabolism	ko00532//Glycosaminoglycan biosynthesis - chondroitin sulfate / dermatan sulfate	K03193	GO:0016021//integral component of membrane	GO:0008146//sulfotransferase activity	GO:0030010//establishment of cell polarity;GO:0050770//regulation of axonogenesis
MergePeak_5100	17	45776261	45776865	0.000455	0.0699	76	58	31	31	29	14	2.290000	3.010000	2.570000	1.210000	0.980000	0.690000	2.620000	0.960000	-1.448461	Intron (ENSBGRT00000015579/ENSBGRG00000008525, intron 2 of 11)	45708101	46046506	338406	+	ENSBGRG00000008525	ENSBGRT00000015579	45708101	46046506	338406	+	ENSBGRG00000008525	ENSBGRT00000015579	68462	AKAP6	A-kinase anchoring protein 6 [Source:HGNC Symbol;Acc:HGNC:376]	-	-	-	-	GO:0005635//nuclear envelope;GO:0016529//sarcoplasmic reticulum;GO:0031965//nuclear membrane;GO:0034704//calcium channel complex;GO:0048471//perinuclear region of cytoplasm	GO:0005515//protein binding;GO:0044325//ion channel binding	GO:0060306//regulation of membrane repolarization;GO:0071320//cellular response to cAMP;GO:1901381//positive regulation of potassium ion transmembrane transport;GO:1902261//positive regulation of delayed rectifier potassium channel activity
MergePeak_2513	12	47054668	47055059	0.000477	0.0699	59	41	65	30	19	21	2.750000	3.280000	8.320000	1.810000	0.990000	1.610000	4.780000	1.470000	-1.701194	Promoter (<=1kb)	47053383	47054118	736	-	ENSBGRG00000016703	ENSBGRT00000030699	47053383	47054118	736	-	ENSBGRG00000016703	ENSBGRT00000030699	-745	PPDPF	XP_010809715.1 pancreatic progenitor cell differentiation and proliferation factor isoform X1 [Bos taurus]	-	-	-	-	-	-	GO:0007275//multicellular organism development;GO:0030154//cell differentiation
MergePeak_3142	13	50973111	50973464	0.000477	0.0699	78	48	48	25	36	22	4.030000	4.260000	6.800000	1.670000	2.070000	1.870000	5.030000	1.870000	-1.427520	5' UTR	50972689	51002259	29571	+	ENSBGRG00000009025	ENSBGRT00000016535	50972689	51002259	29571	+	ENSBGRG00000009025	ENSBGRT00000016535	598	C11orf58	chromosome 11 open reading frame 58 [Source:HGNC Symbol;Acc:HGNC:16990]	-	-	-	-	-	-	-
MergePeak_12742	4	91087602	91088185	0.000491	0.0699	88	45	49	16	34	29	2.750000	2.420000	4.210000	0.650000	1.190000	1.490000	3.130000	1.110000	-1.495603	Intron (ENSBGRT00000040706/ENSBGRG00000021923, intron 1 of 17)	90890147	91183146	293000	-	ENSBGRG00000021923	ENSBGRT00000040706	90890147	91183146	293000	-	ENSBGRG00000021923	ENSBGRT00000040706	95253	SEMA3E	semaphorin 3E [Source:HGNC Symbol;Acc:HGNC:10727]	Organismal Systems	Development	ko04360//Axon guidance	K06840	-	GO:0005515//protein binding;GO:0030215//semaphorin receptor binding	GO:0001569//branching involved in blood vessel morphogenesis;GO:0001953//negative regulation of cell-matrix adhesion;GO:0002040//sprouting angiogenesis;GO:0008360//regulation of cell shape;GO:0016525//negative regulation of angiogenesis;GO:0050808//synapse organization;GO:0071526//semaphorin-plexin signaling pathway;GO:2000249//regulation of actin cytoskeleton reorganization
MergePeak_759	1	148277701	148278358	0.000512	0.0699	73	41	44	25	29	19	2.030000	1.950000	3.350000	0.900000	0.900000	0.870000	2.440000	0.890000	-1.455004	Intron (ENSBGRT00000011528/ENSBGRG00000006213, intron 1 of 2)	148233498	148422767	189270	-	ENSBGRG00000006213	ENSBGRT00000011528	148233498	148422767	189270	-	ENSBGRG00000006213	ENSBGRT00000011528	144738	TMEM108	transmembrane protein 108 [Source:HGNC Symbol;Acc:HGNC:28451]	-	-	-	-	GO:0005769//early endosome;GO:0010008//endosome membrane;GO:0014069//postsynaptic density;GO:0030424//axon;GO:0036477//somatodendritic compartment	-	GO:0006898//receptor-mediated endocytosis;GO:0008090//retrograde axonal transport;GO:0021542//dentate gyrus development;GO:0031175//neuron projection development;GO:0051388//positive regulation of neurotrophin TRK receptor signaling pathway;GO:0097106//postsynaptic density organization;GO:0097484//dendrite extension;GO:0098815//modulation of excitatory postsynaptic potential;GO:1990416//cellular …
MergePeak_13810	6	3864357	3864983	0.000518	0.0699	126	64	69	57	40	32	3.670000	3.200000	5.520000	2.150000	1.300000	1.530000	4.130000	1.660000	-1.314959	Exon (ENSBGRT00000030202/ENSBGRG00000016319, exon 1 of 4)	3864606	3870327	5722	+	ENSBGRG00000016319	ENSBGRT00000030202	3864606	3870327	5722	+	ENSBGRG00000016319	ENSBGRT00000030202	64	MXD4	KAB0354337.1 hypothetical protein FD755_022875 [Muntiacus reevesi]	-	-	-	-	-	GO:0046983//protein dimerization activity	-
MergePeak_2688	12	71055882	71056336	0.000521	0.0699	103	55	46	28	21	37	4.140000	3.790000	5.070000	1.450000	0.940000	2.440000	4.330000	1.610000	-1.427306	5' UTR	71052353	71056249	3897	-	ENSBGRG00000022251	ENSBGRT00000041080	71052353	71056249	3897	-	ENSBGRG00000022251	ENSBGRT00000041080	140	TP53RK	TP53 regulating kinase [Source:HGNC Symbol;Acc:HGNC:16197]	-	-	-	-	GO:0000408//EKC/KEOPS complex;GO:0005634//nucleus;GO:0005737//cytoplasm	GO:0002039//p53 binding;GO:0004672//protein kinase activity;GO:0004674//protein serine/threonine kinase activity;GO:0005524//ATP binding	GO:0006468//protein phosphorylation
MergePeak_7560	20	11780693	11781143	0.000565	0.07	75	41	46	27	14	25	3.040000	2.850000	5.110000	1.410000	0.630000	1.660000	3.670000	1.230000	-1.577122	Exon (ENSBGRT00000049834/ENSBGRG00000026874, exon 9 of 13)	11776994	11782047	5054	+	ENSBGRG00000026874	ENSBGRT00000049834	11776994	11782047	5054	+	ENSBGRG00000026874	ENSBGRT00000049834	3924	EXOC3L1	exocyst complex component 3 like 1 [Source:HGNC Symbol;Acc:HGNC:27540]	-	-	-	-	GO:0000145//exocyst;GO:0030141//secretory granule	-	GO:0006887//exocytosis;GO:0030072//peptide hormone secretion
MergePeak_2191	12	758661	759714	0.000569	0.07	99	40	79	30	27	36	1.710000	1.190000	3.750000	0.670000	0.520000	1.020000	2.220000	0.740000	-1.584963	Promoter (<=1kb)	308223	758647	450425	-	ENSBGRG00000010957	ENSBGRT00000020015	309374	758647	449274	-	ENSBGRG00000010957	ENSBGRT00000020108	-540	CAMK1D	calcium/calmodulin dependent protein kinase ID [Source:HGNC Symbol;Acc:HGNC:19341]	Environmental Information Processing;Organismal Systems;Organismal Systems;Human Diseases	Signal transduction;Endocrine system;Endocrine system;Cancers	ko04020//Calcium signaling pathway;ko04921//Oxytocin signaling pathway;ko04925//Aldosterone synthesis and secretion;ko05214//Glioma	K08794;K08794;K08794;K08794	GO:0005634//nucleus;GO:0005737//cytoplasm	GO:0004672//protein kinase activity;GO:0004683//calmodulin-dependent protein kinase activity;GO:0005524//ATP binding	GO:0006468//protein phosphorylation;GO:0032793//positive regulation of CREB transcription factor activity;GO:0050766//positive regulation of phagocytosis;GO:0050773//regulation of dendrite development;GO:0060267//positive regulation of respiratory burst;GO:0071622//regulation of granulocyte chemotaxis
MergePeak_15359	8	15997346	15997844	0.000622	0.0712	84	50	39	19	32	28	3.080000	3.140000	3.920000	0.900000	1.310000	1.690000	3.380000	1.300000	-1.378512	Intron (ENSBGRT00000011145/ENSBGRG00000005861, intron 1 of 18)	15991861	16033518	41658	+	ENSBGRG00000005861	ENSBGRT00000011145	15991861	16033518	41658	+	ENSBGRG00000005861	ENSBGRT00000011145	5734	LDLR	low density lipoprotein receptor [Source:HGNC Symbol;Acc:HGNC:6547]	Cellular Processes;Human Diseases;Human Diseases;Human Diseases;Organismal Systems;Organismal Systems;Organismal Systems;Organismal Systems;Organismal Systems	Transport and catabolism;Endocrine and metabolic diseases;Infectious diseases;Infectious diseases;Endocrine system;Digestive system;Endocrine system;Digestive system;Endocrine system	ko04144//Endocytosis;ko04934//Cushing syndrome;ko05160//Hepatitis C;ko05145//Toxoplasmosis;ko04925//Aldosterone synthesis and secretion;ko04976//Bile secretion;ko04927//Cortisol synthesis and secretion;ko04979//Cholesterol metabolism;ko04913//Ovarian Steroidogenesis	K12473;K12473;K12473;K12473;K12473;K12473;K12473;K12473;K12473	GO:0005623//cell;GO:0005764//lysosome;GO:0005768//endosome;GO:0005769//early endosome;GO:0005770//late endosome;GO:0005794//Golgi apparatus;GO:0005905//clathrin-coated pit;GO:0009897//external side of plasma membrane;GO:0009986//cell surface;GO:0016323//basolateral plasma membrane;GO:0036477//somatodendritic compartment;GO:0043235//receptor complex;GO:0045177//apical part of cell;GO:0097443//sort…	GO:0001540//amyloid-beta binding;GO:0002020//protease binding;GO:0005041//low-density lipoprotein particle receptor activity;GO:0005509//calcium ion binding;GO:0005515//protein binding;GO:0030169//low-density lipoprotein particle binding;GO:0030229//very-low-density lipoprotein particle receptor activity;GO:0042802//identical protein binding	GO:0006629//lipid metabolic process;GO:0006898//receptor-mediated endocytosis;GO:0006909//phagocytosis;GO:0007616//long-term memory;GO:0008203//cholesterol metabolic process;GO:0010628//positive regulation of gene expression;GO:0010629//negative regulation of gene expression;GO:0010867//positive regulation of triglyceride biosynthetic process;GO:0010899//regulation of phosphatidylcholine cataboli…
MergePeak_5868	19	1853391	1854212	0.000624	0.0712	113	51	70	41	42	33	2.510000	1.940000	4.270000	1.180000	1.040000	1.200000	2.910000	1.140000	-1.351985	Promoter (<=1kb)	1854305	1863607	9303	+	ENSBGRG00000019937	ENSBGRT00000036882	1854305	1863607	9303	+	ENSBGRG00000019937	ENSBGRT00000036882	-504	AMZ2	archaelysin family metallopeptidase 2 [Source:HGNC Symbol;Acc:HGNC:28041]	-	-	-	-	-	GO:0008233//peptidase activity;GO:0008237//metallopeptidase activity	GO:0006508//proteolysis
MergePeak_1989	11	66176591	66177039	0.000637	0.0712	67	63	39	16	28	30	2.730000	4.400000	4.360000	0.840000	1.270000	2.010000	3.830000	1.370000	-1.483168	Promoter (<=1kb)	66177034	66179695	2662	+	ENSBGRG00000013924	ENSBGRT00000025648	66177034	66179695	2662	+	ENSBGRG00000013924	ENSBGRT00000025648	-219	HSPA2	heat shock protein family A (Hsp70) member 2 [Source:HGNC Symbol;Acc:HGNC:5235]	Environmental Information Processing;Cellular Processes;Human Diseases;Genetic Information Processing;Genetic Information Processing;Organismal Systems;Organismal Systems;Human Diseases;Human Diseases;Organismal Systems	Signal transduction;Transport and catabolism;Infectious diseases;Folding, sorting and degradation;Transcription;Endocrine system;Immune system;Infectious diseases;Infectious diseases;Aging	ko04010//MAPK signaling pathway;ko04144//Endocytosis;ko05162//Measles;ko04141//Protein processing in endoplasmic reticulum;ko03040//Spliceosome;ko04915//Estrogen signaling pathway;ko04612//Antigen processing and presentation;ko05145//Toxoplasmosis;ko05134//Legionellosis;ko04213//Longevity regulating pathway - multiple species	K03283;K03283;K03283;K03283;K03283;K03283;K03283;K03283;K03283;K03283	GO:0000795//synaptonemal complex;GO:0001673//male germ cell nucleus;GO:0005829//cytosol;GO:0009986//cell surface;GO:0036128//CatSper complex;GO:0072687//meiotic spindle	GO:0019899//enzyme binding;GO:0051082//unfolded protein binding;GO:0051861//glycolipid binding;GO:0097718//disordered domain specific binding	GO:0001934//positive regulation of protein phosphorylation;GO:0007140//male meiotic nuclear division;GO:0007141//male meiosis I;GO:0007283//spermatogenesis;GO:0007286//spermatid development;GO:0010971//positive regulation of G2/M transition of mitotic cell cycle;GO:0032781//positive regulation of ATPase activity;GO:0042026//protein refolding;GO:0070194//synaptonemal complex disassembly;GO:0090084…
MergePeak_6518	19	55836435	55837174	0.000639	0.0712	113	74	78	62	36	35	2.790000	3.130000	5.280000	1.980000	0.990000	1.420000	3.730000	1.460000	-1.353207	Intron (ENSBGRT00000023744/ENSBGRG00000012962, intron 8 of 9)	55781314	55849504	68191	+	ENSBGRG00000012962	ENSBGRT00000023744	55781314	55849504	68191	+	ENSBGRG00000012962	ENSBGRT00000023744	55490	HNF1B	HNF1 homeobox B [Source:HGNC Symbol;Acc:HGNC:11630]	Human Diseases	Endocrine and metabolic diseases	ko04950//Maturity onset diabetes of the young	K08034	GO:0005634//nucleus;GO:0005654//nucleoplasm;GO:0005667//transcription factor complex;GO:0043231//intracellular membrane-bounded organelle	GO:0000981//DNA-binding transcription factor activity, RNA polymerase II-specific;GO:0000987//proximal promoter sequence-specific DNA binding;GO:0003677//DNA binding;GO:0003700//DNA-binding transcription factor activity;GO:0042802//identical protein binding;GO:0044212//transcription regulatory region DNA binding	GO:0000122//negative regulation of transcription by RNA polymerase II;GO:0001714//endodermal cell fate specification;GO:0001822//kidney development;GO:0001826//inner cell mass cell differentiation;GO:0001889//liver development;GO:0006357//regulation of transcription by RNA polymerase II;GO:0007219//Notch signaling pathway;GO:0007492//endoderm development;GO:0009749//response to glucose;GO:0009952…
MergePeak_4841	17	1330990	1331745	0.000683	0.0746	195	87	117	86	68	69	4.710000	3.610000	7.750000	2.680000	1.830000	2.740000	5.360000	2.420000	-1.147226	Intron (ENSBGRT00000007118/ENSBGRG00000003850, intron 1 of 20)	1162502	1369423	206922	-	ENSBGRG00000003850	ENSBGRT00000007118	1162502	1369423	206922	-	ENSBGRG00000003850	ENSBGRT00000007118	38056	ATP10A	ATPase phospholipid transporting 10A (putative) [Source:HGNC Symbol;Acc:HGNC:13542]	-	-	-	-	GO:0016021//integral component of membrane	GO:0000166//nucleotide binding;GO:0000287//magnesium ion binding;GO:0005524//ATP binding	GO:0015914//phospholipid transport
MergePeak_15452	8	21969576	21969970	0.000726	0.0755	54	49	45	27	26	17	2.500000	3.890000	5.710000	1.610000	1.340000	1.290000	4.030000	1.410000	-1.515085	Intron (ENSBGRT00000001799/ENSBGRG00000000857, intron 1 of 8)	21964742	21987422	22681	+	ENSBGRG00000000857	ENSBGRT00000001799	21964742	21987422	22681	+	ENSBGRG00000000857	ENSBGRT00000001799	5031	TLE2	TLE family member 2, transcriptional corepressor [Source:HGNC Symbol;Acc:HGNC:11838]	-	-	-	-	GO:0005634//nucleus;GO:0005654//nucleoplasm;GO:0005925//focal adhesion;GO:0016604//nuclear body	GO:0005515//protein binding	GO:0006355//regulation of transcription, DNA-templated
MergePeak_16510	9	50530984	50531900	0.000787	0.0786	196	132	131	115	76	87	3.900000	4.510000	7.160000	2.960000	1.690000	2.850000	5.190000	2.500000	-1.053806	Promoter (<=1kb)	50401048	50530448	129401	-	ENSBGRG00000009485	ENSBGRT00000017900	50413892	50530448	116557	-	ENSBGRG00000009485	ENSBGRT00000018795	-994	FBXO11	F-box protein 11 [Source:HGNC Symbol;Acc:HGNC:13590]	-	-	-	-	GO:0000151//ubiquitin ligase complex;GO:0005634//nucleus;GO:0005654//nucleoplasm;GO:0005730//nucleolus;GO:0005737//cytoplasm;GO:0005829//cytosol	GO:0004842//ubiquitin-protein transferase activity;GO:0005515//protein binding;GO:0008270//zinc ion binding;GO:0016274//protein-arginine N-methyltransferase activity	GO:0006464//cellular protein modification process;GO:0007605//sensory perception of sound;GO:0016567//protein ubiquitination
MergePeak_8329	21	40652926	40653392	0.000794	0.0786	85	61	46	36	34	28	3.330000	4.100000	4.940000	1.820000	1.480000	1.800000	4.120000	1.700000	-1.277110	Intron (ENSBGRT00000030885/ENSBGRG00000016812, intron 3 of 5)	40557153	40697726	140574	+	ENSBGRG00000016812	ENSBGRT00000030885	40557153	40697726	140574	+	ENSBGRG00000016812	ENSBGRT00000030885	96006	LDLRAD4	low density lipoprotein receptor class A domain containing 4 [Source:HGNC Symbol;Acc:HGNC:1224]	-	-	-	-	GO:0043231//intracellular membrane-bounded organelle	GO:0005515//protein binding;GO:0070412//R-SMAD binding	GO:0010719//negative regulation of epithelial to mesenchymal transition;GO:0010991//negative regulation of SMAD protein complex assembly;GO:0030336//negative regulation of cell migration;GO:0030512//negative regulation of transforming growth factor beta receptor signaling pathway;GO:0060394//negative regulation of pathway-restricted SMAD protein phosphorylation
MergePeak_890	1	167086733	167087384	0.000833	0.0786	136	63	47	36	43	42	3.810000	3.030000	3.610000	1.300000	1.340000	1.930000	3.480000	1.520000	-1.195016	Intron (ENSBGRT00000010151/ENSBGRG00000005474, intron 1 of 27)	166951121	167180088	228968	-	ENSBGRG00000005474	ENSBGRT00000010151	166951121	167180088	228968	-	ENSBGRG00000005474	ENSBGRT00000010151	93030	ANKRD28	ankyrin repeat domain 28 [Source:HGNC Symbol;Acc:HGNC:29024]	-	-	-	-	-	GO:0005515//protein binding	-
MergePeak_17082	X	118679260	118681336	0.000837	0.0786	74108	99469	83800	21011	25796	47231	650.960000	1499.750000	2019.770000	238.440000	252.740000	681.830000	1390.160000	391.000000	-1.830010	Downstream (1-2kb)	118682111	118682185	75	-	ENSBGRG00000008605	ENSBGRT00000015654	118682111	118682185	75	-	ENSBGRG00000008605	ENSBGRT00000015654	1887	--	-	-	-	-	-	-	-	-
MergePeak_14903	7	64886202	64886742	0.000839	0.0786	103	71	59	46	20	39	3.480000	4.120000	5.470000	2.010000	0.750000	2.160000	4.360000	1.640000	-1.410632	Promoter (<=1kb)	64856887	64886397	29511	-	ENSBGRG00000015370	ENSBGRT00000028193	64857248	64886397	29150	-	ENSBGRG00000015370	ENSBGRT00000028446	-75	PSAT1	phosphoserine aminotransferase 1 [Source:HGNC Symbol;Acc:HGNC:19129]	Metabolism;Metabolism;Metabolism;Metabolism;Metabolism;Metabolism	Global and overview maps;Global and overview maps;Global and overview maps;Amino acid metabolism;Amino acid metabolism;Metabolism of cofactors and vitamins	ko01100//Metabolic pathways;ko01200//Carbon metabolism;ko01230//Biosynthesis of amino acids;ko00270//Cysteine and methionine metabolism;ko00260//Glycine, serine and threonine metabolism;ko00750//Vitamin B6 metabolism	K00831;K00831;K00831;K00831;K00831;K00831	GO:0005829//cytosol	GO:0003824//catalytic activity;GO:0004648//O-phospho-L-serine:2-oxoglutarate aminotransferase activity	GO:0006564//L-serine biosynthetic process
MergePeak_3503	14	28601103	28601584	0.000871	0.0803	85	52	54	27	36	32	3.220000	3.380000	5.620000	1.320000	1.520000	1.990000	4.070000	1.610000	-1.337968	Intron (ENSBGRT00000017563/ENSBGRG00000009512, intron 1 of 4)	28576837	28605944	29108	-	ENSBGRG00000009512	ENSBGRT00000017563	28576837	28605944	29108	-	ENSBGRG00000009512	ENSBGRT00000017563	4601	C1orf100	chromosome 1 open reading frame 100 [Source:HGNC Symbol;Acc:HGNC:30435]	-	-	-	-	-	-	-
MergePeak_15431	8	20765828	20766500	0.000901	0.0818	131	75	70	53	30	50	3.550000	3.490000	5.210000	1.860000	0.910000	2.230000	4.080000	1.670000	-1.288721	Intron (ENSBGRT00000028887/ENSBGRG00000015300, intron 1 of 10)	20748412	20776258	27847	+	ENSBGRG00000015300	ENSBGRT00000028887	20748412	20776258	27847	+	ENSBGRG00000015300	ENSBGRT00000028887	17752	SH3GL1	SH3 domain containing GRB2 like 1, endophilin A2 [Source:HGNC Symbol;Acc:HGNC:10830]	Cellular Processes	Transport and catabolism	ko04144//Endocytosis	K11247	GO:0005737//cytoplasm;GO:0005829//cytosol;GO:0098793//presynapse;GO:0098978//glutamatergic synapse	GO:0005515//protein binding;GO:0042802//identical protein binding	GO:0016191//synaptic vesicle uncoating
MergePeak_10941	28	41960761	41961369	0.000966	0.0864	131	78	55	45	52	46	3.930000	4.020000	4.530000	1.740000	1.740000	2.270000	4.160000	1.920000	-1.115477	Promoter (<=1kb)	41954884	41960562	5679	-	ENSBGRG00000007303	ENSBGRT00000013378	41954884	41960562	5679	-	ENSBGRG00000007303	ENSBGRT00000013378	-503	ING2	inhibitor of growth family member 2 [Source:HGNC Symbol;Acc:HGNC:6063]	-	-	-	-	GO:0005634//nucleus;GO:0005654//nucleoplasm;GO:0005794//Golgi apparatus;GO:0005829//cytosol;GO:0005886//plasma membrane;GO:0016580//Sin3 complex;GO:0016602//CCAAT-binding factor complex	GO:0003677//DNA binding;GO:0003682//chromatin binding;GO:0035064//methylated histone binding;GO:0035091//phosphatidylinositol binding;GO:0044877//protein-containing complex binding	GO:0006325//chromatin organization;GO:0006355//regulation of transcription, DNA-templated;GO:0007141//male meiosis I;GO:0007283//spermatogenesis;GO:0007286//spermatid development;GO:0008285//negative regulation of cell proliferation;GO:0030317//flagellated sperm motility;GO:0030511//positive regulation of transforming growth factor beta receptor signaling pathway;GO:0031065//positive regulation o…
MergePeak_10658	27	31524153	31525345	0.00107	0.0893	188	97	83	83	59	67	2.880000	2.550000	3.480000	1.640000	1.010000	1.680000	2.970000	1.440000	-1.044394	Promoter (<=1kb)	31519714	31524252	4539	-	ENSBGRG00000021005	ENSBGRT00000038687	31519714	31524252	4539	-	ENSBGRG00000021005	ENSBGRT00000038687	-497	ZNF503	zinc finger protein 503 [Source:HGNC Symbol;Acc:HGNC:23589]	-	-	-	-	-	GO:0003676//nucleic acid binding	GO:0008285//negative regulation of cell proliferation;GO:0010629//negative regulation of gene expression;GO:0061351//neural precursor cell proliferation;GO:0070315//G1 to G0 transition involved in cell differentiation
MergePeak_15636	8	49520161	49520694	0.00109	0.0893	106	64	68	50	36	38	3.630000	3.760000	6.380000	2.210000	1.370000	2.140000	4.590000	1.910000	-1.264922	Intron (ENSBGRT00000001859/ENSBGRG00000001004, intron 1 of 6)	49474551	49556505	81955	-	ENSBGRG00000001004	ENSBGRT00000001859	49474551	49556505	81955	-	ENSBGRG00000001004	ENSBGRT00000001859	36078	VDAC1	voltage dependent anion channel 1 [Source:HGNC Symbol;Acc:HGNC:12669]	Human Diseases;Human Diseases;Human Diseases;Environmental Information Processing;Human Diseases;Human Diseases;Human Diseases;Organismal Systems;Environmental Information Processing;Cellular Processes;Cellular Processes;Organismal Systems	Neurodegenerative diseases;Neurodegenerative diseases;Infectious diseases;Signal transduction;Infectious diseases;Neurodegenerative diseases;Infectious diseases;Immune system;Signal transduction;Cell growth and death;Cell growth and death;Digestive system	ko05010//Alzheimer disease;ko05016//Huntington disease;ko05166//HTLV-I infection;ko04020//Calcium signaling pathway;ko05131//Shigellosis;ko05012//Parkinson disease;ko05164//Influenza A;ko04621//NOD-like receptor signaling pathway;ko04022//cGMP - PKG signaling pathway;ko04217//Necroptosis;ko04218//Cellular senescence;ko04979//Cholesterol metabolism	K05862;K05862;K05862;K05862;K05862;K05862;K05862;K05862;K05862;K05862;K05862;K05862	GO:0005739//mitochondrion;GO:0005741//mitochondrial outer membrane;GO:0005757//mitochondrial permeability transition pore complex;GO:0005886//plasma membrane;GO:0016020//membrane;GO:0016021//integral component of membrane;GO:0042645//mitochondrial nucleoid	GO:0008308//voltage-gated anion channel activity;GO:0019901//protein kinase binding;GO:0042802//identical protein binding;GO:0044325//ion channel binding	GO:0001662//behavioral fear response;GO:0006820//anion transport;GO:0006915//apoptotic process;GO:0007268//chemical synaptic transmission;GO:0007270//neuron-neuron synaptic transmission;GO:0007612//learning;GO:0030855//epithelial cell differentiation;GO:0055085//transmembrane transport;GO:0098656//anion transmembrane transport;GO:1903146//regulation of autophagy of mitochondrion;GO:2000378//negat…
MergePeak_13751	5	124964888	124965246	0.00113	0.0896	77	39	51	23	23	30	3.920000	3.410000	7.130000	1.510000	1.310000	2.510000	4.820000	1.780000	-1.437156	Intron (ENSBGRT00000002031/ENSBGRG00000001070, intron 1 of 10)	124956313	125118146	161834	+	ENSBGRG00000001070	ENSBGRT00000002031	124956313	125118146	161834	+	ENSBGRG00000001070	ENSBGRT00000002031	8754	ATXN10	ataxin 10 [Source:HGNC Symbol;Acc:HGNC:10549]	Human Diseases	Neurodegenerative disease	ko05017//Spinocerebellar ataxia	K19323	GO:0005737//cytoplasm;GO:0005829//cytosol;GO:0005886//plasma membrane;GO:0030425//dendrite;GO:0043025//neuronal cell body;GO:0048471//perinuclear region of cytoplasm	-	GO:0007399//nervous system development;GO:0031175//neuron projection development;GO:0060271//cilium assembly
MergePeak_8527	22	10454765	10455451	0.00114	0.0896	108	88	74	55	64	38	2.870000	4.020000	5.400000	1.890000	1.900000	1.660000	4.100000	1.820000	-1.171685	Promoter (<=1kb)	10423231	10454364	31134	-	ENSBGRG00000019593	ENSBGRT00000036140	10424608	10454364	29757	-	ENSBGRG00000019593	ENSBGRT00000036516	-744	Cdc25A	cell division cycle 25A [Source:HGNC Symbol;Acc:HGNC:1725]	Cellular Processes;Human Diseases;Cellular Processes;Organismal Systems	Cell growth and death;Cancers;Cell growth and death;Endocrine system	ko04218//Cellular senescence;ko05206//MicroRNAs in cancer;ko04110//Cell cycle;ko04914//Progesterone-mediated oocyte maturation	K06645;K06645;K06645;K06645	GO:0005634//nucleus;GO:0005737//cytoplasm	GO:0004725//protein tyrosine phosphatase activity;GO:0019901//protein kinase binding;GO:0051087//chaperone binding	GO:0006470//protein dephosphorylation;GO:0009314//response to radiation;GO:0034644//cellular response to UV;GO:0035335//peptidyl-tyrosine dephosphorylation;GO:0051301//cell division;GO:1902751//positive regulation of cell cycle G2/M phase transition
MergePeak_4605	16	56602871	56603537	0.0012	0.093	93	42	74	31	45	29	2.550000	1.970000	5.560000	1.100000	1.370000	1.300000	3.360000	1.260000	-1.415037	Intron (ENSBGRT00000023355/ENSBGRG00000012520, intron 12 of 48)	56519276	56710531	191256	+	ENSBGRG00000012520	ENSBGRT00000023355	56519276	56710531	191256	+	ENSBGRG00000012520	ENSBGRT00000023355	83928	NCOR2	nuclear receptor corepressor 2 [Source:HGNC Symbol;Acc:HGNC:7673]	Human Diseases;Environmental Information Processing	Infectious diseases;Signal transduction	ko05169//Epstein-Barr virus infection;ko04330//Notch signaling pathway	K06065;K06065	GO:0000790//nuclear chromatin;GO:0005634//nucleus;GO:0005654//nucleoplasm;GO:0016363//nuclear matrix;GO:0016604//nuclear body;GO:0017053//transcriptional repressor complex	GO:0003677//DNA binding;GO:0003714//transcription corepressor activity;GO:0005112//Notch binding;GO:0042826//histone deacetylase binding;GO:0047485//protein N-terminus binding	GO:0000122//negative regulation of transcription by RNA polymerase II;GO:0010565//regulation of cellular ketone metabolic process;GO:0045892//negative regulation of transcription, DNA-templated;GO:0060766//negative regulation of androgen receptor signaling pathway;GO:1903799//negative regulation of production of miRNAs involved in gene silencing by miRNA
MergePeak_5617	18	35588902	35589550	0.00124	0.093	135	62	46	35	34	46	3.800000	2.990000	3.550000	1.270000	1.070000	2.130000	3.450000	1.490000	-1.211284	Intron (ENSBGRT00000037055/ENSBGRG00000019880, intron 3 of 5)	35498115	35774567	276453	+	ENSBGRG00000019880	ENSBGRT00000037055	35498115	35774567	276453	+	ENSBGRG00000019880	ENSBGRT00000037055	91111	SAMD12	XP_027417070.1 sterile alpha motif domain-containing protein 12 isoform X1 [Bos indicus x Bos taurus]	-	-	-	-	-	GO:0005515//protein binding	-
MergePeak_15453	8	21970147	21970588	0.00126	0.093	109	43	46	38	18	30	4.510000	3.050000	5.220000	2.030000	0.830000	2.040000	4.260000	1.630000	-1.385981	Intron (ENSBGRT00000001799/ENSBGRG00000000857, intron 1 of 8)	21964742	21987422	22681	+	ENSBGRG00000000857	ENSBGRT00000001799	21964742	21987422	22681	+	ENSBGRG00000000857	ENSBGRT00000001799	5625	TLE2	TLE family member 2, transcriptional corepressor [Source:HGNC Symbol;Acc:HGNC:11838]	-	-	-	-	GO:0005634//nucleus;GO:0005654//nucleoplasm;GO:0005925//focal adhesion;GO:0016604//nuclear body	GO:0005515//protein binding	GO:0006355//regulation of transcription, DNA-templated
MergePeak_3833	14	71759423	71760602	0.00133	0.0962	173	143	108	100	64	89	2.680000	3.800000	4.580000	2.000000	1.100000	2.260000	3.690000	1.790000	-1.043661	Promoter (1-2kb)	71680347	71758957	78611	-	ENSBGRG00000021515	ENSBGRT00000039921	71680347	71758957	78611	-	ENSBGRG00000021515	ENSBGRT00000039921	-1055	PPP2R5A	protein phosphatase 2 regulatory subunit B'alpha [Source:HGNC Symbol;Acc:HGNC:9309]	Environmental Information Processing;Human Diseases;Organismal Systems;Organismal Systems;Cellular Processes;Environmental Information Processing;Genetic Information Processing;Environmental Information Processing	Signal transduction;Infectious diseases;Circulatory system;Nervous system;Cell growth and death;Signal transduction;Translation;Signal transduction	ko04151//PI3K-Akt signaling pathway;ko05165//Human papillomavirus infection;ko04261//Adrenergic signaling in cardiomyocytes;ko04728//Dopaminergic synapse;ko04114//Oocyte meiosis;ko04152//AMPK signaling pathway;ko03015//mRNA surveillance pathway;ko04071//Sphingolipid signaling pathway	K11584;K11584;K11584;K11584;K11584;K11584;K11584;K11584	GO:0000159//protein phosphatase type 2A complex;GO:0005737//cytoplasm;GO:0005813//centrosome;GO:0005829//cytosol;GO:0016020//membrane;GO:0030018//Z disc;GO:0031430//M band	GO:0004721//phosphoprotein phosphatase activity;GO:0019888//protein phosphatase regulator activity;GO:0019900//kinase binding	GO:0006470//protein dephosphorylation;GO:0007165//signal transduction;GO:0035307//positive regulation of protein dephosphorylation;GO:0090219//negative regulation of lipid kinase activity;GO:1903077//negative regulation of protein localization to plasma membrane
MergePeak_828	1	159775565	159776623	0.00135	0.0962	153	99	104	62	68	77	2.640000	2.930000	4.920000	1.380000	1.310000	2.180000	3.500000	1.620000	-1.111361	Intron (ENSBGRT00000004525/ENSBGRG00000002397, intron 1 of 10)	159753631	159799442	45812	+	ENSBGRG00000002397	ENSBGRT00000004525	159753631	159799442	45812	+	ENSBGRG00000002397	ENSBGRT00000004525	22463	PRMT2	protein arginine methyltransferase 2 [Source:HGNC Symbol;Acc:HGNC:5186]	-	-	-	-	GO:0005634//nucleus;GO:0005654//nucleoplasm;GO:0005737//cytoplasm;GO:0005829//cytosol	GO:0003713//transcription coactivator activity;GO:0005515//protein binding;GO:0008168//methyltransferase activity;GO:0030331//estrogen receptor binding;GO:0033142//progesterone receptor binding;GO:0042054//histone methyltransferase activity;GO:0042803//protein homodimerization activity;GO:0042974//retinoic acid receptor binding;GO:0042975//peroxisome proliferator activated receptor binding;GO:004…	GO:0006479//protein methylation;GO:0016571//histone methylation;GO:0032088//negative regulation of NF-kappaB transcription factor activity;GO:0043065//positive regulation of apoptotic process;GO:0045892//negative regulation of transcription, DNA-templated;GO:0045893//positive regulation of transcription, DNA-templated;GO:0060765//regulation of androgen receptor signaling pathway
MergePeak_7663	20	33800335	33801075	0.00136	0.0962	150	98	91	65	53	72	3.700000	4.150000	6.150000	2.070000	1.460000	2.920000	4.670000	2.150000	-1.119086	Promoter (<=1kb)	33792086	33800429	8344	-	ENSBGRG00000019858	ENSBGRT00000036661	33794594	33800429	5836	-	ENSBGRG00000019858	ENSBGRT00000036854	-276	ORC6	origin recognition complex subunit 6 [Source:HGNC Symbol;Acc:HGNC:17151]	Cellular Processes	Cell growth and death	ko04110//Cell cycle	K02608	GO:0000808//origin recognition complex;GO:0001650//fibrillar center;GO:0005654//nucleoplasm;GO:0005664//nuclear origin of replication recognition complex	GO:0003677//DNA binding	GO:0006260//DNA replication;GO:0051782//negative regulation of cell division
MergePeak_14637	7	28304651	28305174	0.00144	0.0962	125	73	79	54	60	46	4.360000	4.370000	7.560000	2.430000	2.330000	2.640000	5.430000	2.470000	-1.136441	5' UTR	28288479	28305315	16837	-	ENSBGRG00000000573	ENSBGRT00000001004	28288479	28305315	16837	-	ENSBGRG00000000573	ENSBGRT00000001004	403	MRPL50	mitochondrial ribosomal protein L50 [Source:HGNC Symbol;Acc:HGNC:16654]	-	-	-	-	GO:0005739//mitochondrion;GO:0005762//mitochondrial large ribosomal subunit	-	-
MergePeak_2976	13	31689952	31690588	0.0015	0.0962	62	63	44	27	28	30	1.780000	3.100000	3.460000	1.000000	0.900000	1.410000	2.780000	1.100000	-1.337581	Intron (ENSBGRT00000042596/ENSBGRG00000022949, intron 2 of 6)	31658084	31736604	78521	+	ENSBGRG00000022949	ENSBGRT00000042596	31658084	31736604	78521	+	ENSBGRG00000022949	ENSBGRT00000042596	32186	GDPD5	glycerophosphodiester phosphodiesterase domain containing 5 [Source:HGNC Symbol;Acc:HGNC:28804]	-	-	-	-	GO:0016020//membrane;GO:0030424//axon;GO:0043025//neuronal cell body;GO:0097038//perinuclear endoplasmic reticulum	GO:0008081//phosphoric diester hydrolase activity;GO:0047389//glycerophosphocholine phosphodiesterase activity	GO:0006629//lipid metabolic process;GO:0021522//spinal cord motor neuron differentiation;GO:0021895//cerebral cortex neuron differentiation;GO:0031175//neuron projection development;GO:0045666//positive regulation of neuron differentiation;GO:0045746//negative regulation of Notch signaling pathway;GO:0045787//positive regulation of cell cycle;GO:0048505//regulation of timing of cell differentiati…
MergePeak_13063	5	30028826	30029491	0.0015	0.0962	114	72	76	52	39	49	3.130000	3.390000	5.720000	1.840000	1.190000	2.210000	4.080000	1.750000	-1.221214	Promoter (<=1kb)	30029803	30353399	323597	+	ENSBGRG00000009634	ENSBGRT00000019215	30029803	30353399	323597	+	ENSBGRG00000009634	ENSBGRT00000019215	-645	RBFOX2	RNA binding fox-1 homolog 2 [Source:HGNC Symbol;Acc:HGNC:9906]	-	-	-	-	GO:0005634//nucleus;GO:0005654//nucleoplasm;GO:0005829//cytosol	GO:0003676//nucleic acid binding;GO:0003714//transcription corepressor activity;GO:0003723//RNA binding;GO:0003729//mRNA binding;GO:0008134//transcription factor binding	GO:0000381//regulation of alternative mRNA splicing, via spliceosome;GO:0010724//regulation of definitive erythrocyte differentiation;GO:0021942//radial glia guided migration of Purkinje cell;GO:0030520//intracellular estrogen receptor signaling pathway;GO:0043484//regulation of RNA splicing;GO:0045892//negative regulation of transcription, DNA-templated;GO:0048813//dendrite morphogenesis;GO:0050…
MergePeak_14458	7	5550487	5550978	0.00152	0.0962	84	52	41	32	40	22	3.120000	3.310000	4.180000	1.540000	1.660000	1.340000	3.540000	1.510000	-1.229201	Intron (ENSBGRT00000025164/ENSBGRG00000013709, intron 2 of 12)	5477315	5567370	90056	-	ENSBGRG00000013709	ENSBGRT00000025164	5477315	5567370	90056	-	ENSBGRG00000013709	ENSBGRT00000025164	16638	LOXL2	lysyl oxidase like 2 [Source:HGNC Symbol;Acc:HGNC:6666]	-	-	-	-	GO:0000785//chromatin;GO:0005615//extracellular space;GO:0005634//nucleus;GO:0005654//nucleoplasm;GO:0005783//endoplasmic reticulum;GO:0016020//membrane	GO:0004720//protein-lysine 6-oxidase activity;GO:0005044//scavenger receptor activity;GO:0005507//copper ion binding;GO:0005509//calcium ion binding;GO:0016641//oxidoreductase activity, acting on the CH-NH2 group of donors, oxygen as acceptor;GO:0070492//oligosaccharide binding	GO:0000122//negative regulation of transcription by RNA polymerase II;GO:0001666//response to hypoxia;GO:0001837//epithelial to mesenchymal transition;GO:0001935//endothelial cell proliferation;GO:0002040//sprouting angiogenesis;GO:0006464//cellular protein modification process;GO:0010718//positive regulation of epithelial to mesenchymal transition;GO:0018057//peptidyl-lysine oxidation;GO:0030199…
MergePeak_756	1	148066228	148066793	0.00156	0.0962	154	74	100	62	63	62	4.970000	4.100000	8.860000	2.590000	2.270000	3.290000	5.980000	2.720000	-1.136539	Promoter (<=1kb)	148053661	148065860	12200	-	ENSBGRG00000004386	ENSBGRT00000008114	148053661	148065860	12200	-	ENSBGRG00000004386	ENSBGRT00000008114	-650	CDV3	XP_005202000.2 protein CDV3 homolog isoform X1 [Bos taurus]	-	-	-	-	-	-	-
MergePeak_6000	19	14002715	14003168	0.00157	0.0962	85	66	50	40	30	35	3.420000	4.560000	5.520000	2.080000	1.350000	2.320000	4.500000	1.920000	-1.228819	Promoter (<=1kb)	14003145	14007531	4387	+	ENSBGRG00000025552	ENSBGRT00000047252	14003145	14007531	4387	+	ENSBGRG00000025552	ENSBGRT00000047252	-204	MRPL12	mitochondrial ribosomal protein L12 [Source:HGNC Symbol;Acc:HGNC:10378]	Genetic Information Processing	Translation	ko03010//Ribosome	K02935	GO:0005739//mitochondrion;GO:0005762//mitochondrial large ribosomal subunit;GO:0005840//ribosome	GO:0003735//structural constituent of ribosome	GO:0006390//mitochondrial transcription;GO:0006412//translation;GO:0045893//positive regulation of transcription, DNA-templated
MergePeak_89	1	31788499	31789215	0.00158	0.0962	128	56	52	47	32	39	3.260000	2.450000	3.630000	1.550000	0.910000	1.630000	3.110000	1.360000	-1.193308	Intron (ENSBGRT00000000142/ENSBGRG00000000080, intron 2 of 3)	31783463	31799779	16317	+	ENSBGRG00000000080	ENSBGRT00000000142	31783463	31799779	16317	+	ENSBGRG00000000080	ENSBGRT00000000142	5394	BACH1	BTB domain and CNC homolog 1 [Source:HGNC Symbol;Acc:HGNC:935]	-	-	-	-	GO:0005634//nucleus	GO:0000978//RNA polymerase II proximal promoter sequence-specific DNA binding;GO:0001227//DNA-binding transcription repressor activity, RNA polymerase II-specific;GO:0001228//DNA-binding transcription activator activity, RNA polymerase II-specific;GO:0003677//DNA binding;GO:0003700//DNA-binding transcription factor activity;GO:0005515//protein binding	GO:0000083//regulation of transcription involved in G1/S transition of mitotic cell cycle;GO:0000117//regulation of transcription involved in G2/M transition of mitotic cell cycle;GO:0000122//negative regulation of transcription by RNA polymerase II;GO:0006281//DNA repair;GO:0006355//regulation of transcription, DNA-templated;GO:0045944//positive regulation of transcription by RNA polymerase II;G…
MergePeak_15220	8	5019838	5020212	0.00158	0.0962	47	55	69	39	17	23	2.290000	4.600000	9.230000	2.460000	0.920000	1.840000	5.370000	1.740000	-1.625835	Intron (ENSBGRT00000048427/ENSBGRG00000026182, intron 1 of 4)	5018999	5022801	3803	+	ENSBGRG00000026182	ENSBGRT00000048427	5018999	5022801	3803	+	ENSBGRG00000026182	ENSBGRT00000048427	1026	MPV17L2	MPV17 mitochondrial inner membrane protein like 2 [Source:HGNC Symbol;Acc:HGNC:28177]	Cellular Processes	Transport and catabolism	ko04146//Peroxisome	K13348	GO:0005743//mitochondrial inner membrane;GO:0005762//mitochondrial large ribosomal subunit;GO:0016021//integral component of membrane	-	GO:0061668//mitochondrial ribosome assembly;GO:0070131//positive regulation of mitochondrial translation
MergePeak_11939	3	93929710	93930185	0.00163	0.0962	69	40	54	29	20	28	2.650000	2.640000	5.690000	1.440000	0.860000	1.770000	3.660000	1.360000	-1.428237	Intron (ENSBGRT00000045161/ENSBGRG00000024465, intron 5 of 15)	93597764	94153455	555692	-	ENSBGRG00000024465	ENSBGRT00000045161	93597764	94153455	555692	-	ENSBGRG00000024465	ENSBGRT00000045161	223508	FGGY	FGGY carbohydrate kinase domain containing [Source:HGNC Symbol;Acc:HGNC:25610]	-	-	-	-	-	GO:0016773//phosphotransferase activity, alcohol group as acceptor;GO:0019150//D-ribulokinase activity	GO:0005975//carbohydrate metabolic process;GO:0019321//pentose metabolic process;GO:0046835//carbohydrate phosphorylation;GO:0070050//neuron cellular homeostasis
MergePeak_807	1	157960008	157960570	0.00163	0.0962	99	38	60	31	34	32	3.210000	2.120000	5.340000	1.300000	1.230000	1.710000	3.560000	1.410000	-1.336182	Intron (ENSBGRT00000000313/ENSBGRG00000000193, intron 1 of 5)	157943131	157962527	19397	-	ENSBGRG00000000193	ENSBGRT00000000313	157943131	157962527	19397	-	ENSBGRG00000000193	ENSBGRT00000000313	2238	PTTG1IP	PTTG1 interacting protein [Source:HGNC Symbol;Acc:HGNC:13524]	-	-	-	-	GO:0005634//nucleus;GO:0005654//nucleoplasm;GO:0005737//cytoplasm	GO:0002039//p53 binding	GO:0006606//protein import into nucleus;GO:0031398//positive regulation of protein ubiquitination;GO:0043518//negative regulation of DNA damage response, signal transduction by p53 class mediator;GO:1902254//negative regulation of intrinsic apoptotic signaling pathway by p53 class mediator;GO:1903364//positive regulation of cellular protein catabolic process
MergePeak_10327	26	43669900	43670575	0.00163	0.0962	100	45	32	39	22	20	2.700000	2.090000	2.370000	1.360000	0.660000	0.890000	2.390000	0.970000	-1.300954	3' UTR	43663173	43670316	7144	+	ENSBGRG00000014511	ENSBGRT00000026715	43663173	43670316	7144	+	ENSBGRG00000014511	ENSBGRT00000026715	7064	UBALD1	UBA like domain containing 1 [Source:HGNC Symbol;Acc:HGNC:29576]	-	-	-	-	-	GO:0005515//protein binding	-
MergePeak_1904	11	53580139	53580957	0.00168	0.0962	105	63	75	50	39	42	2.340000	2.410000	4.590000	1.440000	0.970000	1.540000	3.110000	1.320000	-1.236377	Downstream (1-2kb)	53555961	53580133	24173	+	ENSBGRG00000019626	ENSBGRT00000036393	53555961	53580133	24173	+	ENSBGRG00000019626	ENSBGRT00000036573	24587	SHF	Src homology 2 domain containing F [Source:HGNC Symbol;Acc:HGNC:25116]	-	-	-	-	-	-	-
MergePeak_2552	12	53445083	53445511	0.00168	0.0962	85	36	46	28	31	24	3.620000	2.630000	5.380000	1.540000	1.470000	1.680000	3.880000	1.560000	-1.314511	Promoter (<=1kb)	53445390	53466845	21456	+	ENSBGRG00000011719	ENSBGRT00000021684	53445390	53466845	21456	+	ENSBGRG00000011719	ENSBGRT00000021684	-93	NSFL1C	NSFL1 cofactor [Source:HGNC Symbol;Acc:HGNC:15912]	Genetic Information Processing	Folding, sorting and degradation	ko04141//Protein processing in endoplasmic reticulum	K14012	GO:0005654//nucleoplasm;GO:0005829//cytosol;GO:0005886//plasma membrane;GO:0045111//intermediate filament cytoskeleton	GO:0005515//protein binding	GO:0000132//establishment of mitotic spindle orientation;GO:0046604//positive regulation of mitotic centrosome separation;GO:1904780//negative regulation of protein localization to centrosome
MergePeak_12335	4	19898326	19898828	0.00174	0.0981	75	69	107	46	55	37	2.720000	4.300000	10.670000	2.160000	2.230000	2.210000	5.900000	2.200000	-1.423211	Promoter (<=1kb)	19899190	20034889	135700	+	ENSBGRG00000003147	ENSBGRT00000005901	19899190	20031444	132255	+	ENSBGRG00000003147	ENSBGRT00000005973	-613	CREB3L2	cAMP responsive element binding protein 3 like 2 [Source:HGNC Symbol;Acc:HGNC:23720]	Environmental Information Processing;Human Diseases;Human Diseases;Human Diseases;Organismal Systems;Human Diseases;Environmental Information Processing;Human Diseases;Human Diseases;Environmental Information Processing;Human Diseases;Human Diseases;Organismal Systems;Organismal Systems;Organismal Systems;Organismal Systems;Environmental Information Processing;Organismal Systems;Organismal System…	Signal transduction;Infectious diseases;Neurodegenerative diseases;Infectious diseases;Environmental adaptation;Infectious diseases;Signal transduction;Cancers;Substance dependence;Signal transduction;Infectious diseases;Endocrine and metabolic diseases;Circulatory system;Endocrine system;Nervous system;Endocrine system;Signal transduction;Endocrine system;Nervous system;Signal transduction;Endoc…	ko04151//PI3K-Akt signaling pathway;ko05165//Human papillomavirus infection;ko05016//Huntington disease;ko05166//HTLV-I infection;ko04714//Thermogenesis;ko05163//Human cytomegalovirus infection;ko04024//cAMP signaling pathway;ko05203//Viral carcinogenesis;ko05034//Alcoholism;ko04022//cGMP - PKG signaling pathway;ko05161//Hepatitis B;ko04934//Cushing syndrome;ko04261//Adrenergic signaling in cardi…	K09048;K09048;K09048;K09048;K09048;K09048;K09048;K09048;K09048;K09048;K09048;K09048;K09048;K09048;K09048;K09048;K09048;K09048;K09048;K09048;K09048;K09048;K09048;K09048;K09048;K09048;K09048;K09048;K09048;K09048;K09048;K09048;K09048	GO:0005634//nucleus;GO:0005654//nucleoplasm;GO:0005783//endoplasmic reticulum	GO:0000978//RNA polymerase II proximal promoter sequence-specific DNA binding;GO:0001228//DNA-binding transcription activator activity, RNA polymerase II-specific;GO:0003700//DNA-binding transcription factor activity;GO:0035497//cAMP response element binding;GO:0044212//transcription regulatory region DNA binding	GO:0002062//chondrocyte differentiation;GO:0006355//regulation of transcription, DNA-templated;GO:0006888//ER to Golgi vesicle-mediated transport;GO:0030968//endoplasmic reticulum unfolded protein response;GO:0034976//response to endoplasmic reticulum stress;GO:0045893//positive regulation of transcription, DNA-templated;GO:0045944//positive regulation of transcription by RNA polymerase II;GO:005…
MergePeak_10178	26	17648769	17649582	0.00177	0.0981	151	101	90	83	68	61	3.390000	3.890000	5.540000	2.410000	1.700000	2.250000	4.270000	2.120000	-1.010172	Downstream (1-2kb)	17650356	17656237	5882	-	ENSBGRG00000025688	ENSBGRT00000047488	17634534	17646553	12020	-	ENSBGRG00000025628	ENSBGRT00000047471	-2622	PRR14	proline rich 14 [Source:HGNC Symbol;Acc:HGNC:28458]	-	-	-	-	-	-	-
MergePeak_8242	21	26123722	26124525	0.00178	0.0981	128	82	53	53	33	49	2.910000	3.200000	3.300000	1.550000	0.840000	1.830000	3.140000	1.410000	-1.155069	Intron (ENSBGRT00000045062/ENSBGRG00000024405, intron 2 of 3)	26036701	26153111	116411	+	ENSBGRG00000024405	ENSBGRT00000045062	26036701	26153111	116411	+	ENSBGRG00000024405	ENSBGRT00000045062	87422	KCTD1	NP_001073829.2 BTB/POZ domain-containing protein KCTD1 [Bos taurus]	-	-	-	-	-	GO:0005515//protein binding	GO:0051260//protein homooligomerization
MergePeak_14569	7	20766028	20766508	0.00186	0.0992	65	46	43	16	19	33	2.470000	3.000000	4.480000	0.790000	0.810000	2.060000	3.320000	1.220000	-1.444302	Promoter (<=1kb)	20705038	20765958	60921	-	ENSBGRG00000013860	ENSBGRT00000025406	20706786	20765958	59173	-	ENSBGRG00000013860	ENSBGRT00000025489	-310	BICD2	BICD cargo adaptor 2 [Source:HGNC Symbol;Acc:HGNC:17208]	-	-	-	-	GO:0005635//nuclear envelope;GO:0005642//annulate lamellae;GO:0005643//nuclear pore;GO:0005737//cytoplasm;GO:0005794//Golgi apparatus;GO:0005813//centrosome;GO:0005829//cytosol;GO:0005886//plasma membrane;GO:0031410//cytoplasmic vesicle	GO:0008093//cytoskeletal adaptor activity;GO:0017137//Rab GTPase binding;GO:0034452//dynactin binding;GO:0051959//dynein light intermediate chain binding;GO:0070840//dynein complex binding	GO:0006890//retrograde vesicle-mediated transport, Golgi to ER;GO:0007018//microtubule-based movement;GO:0034067//protein localization to Golgi apparatus;GO:0051642//centrosome localization;GO:0070507//regulation of microtubule cytoskeleton organization;GO:0072385//minus-end-directed organelle transport along microtubule;GO:0072393//microtubule anchoring at microtubule organizing center
MergePeak_12517	4	47545693	47546426	0.00194	0.0992	140	66	60	56	50	43	3.480000	2.820000	4.100000	1.800000	1.390000	1.760000	3.470000	1.650000	-1.072470	Exon (ENSBGRT00000034691/ENSBGRG00000018927, exon 1 of 10)	47545553	47609134	63582	+	ENSBGRG00000018927	ENSBGRT00000034691	47545553	47609134	63582	+	ENSBGRG00000018927	ENSBGRT00000034691	506	CCM2	CCM2 scaffold protein [Source:HGNC Symbol;Acc:HGNC:21708]	-	-	-	-	GO:0005737//cytoplasm;GO:0005739//mitochondrion;GO:0032991//protein-containing complex	GO:0005515//protein binding	GO:0001568//blood vessel development;GO:0001570//vasculogenesis;GO:0001701//in utero embryonic development;GO:0001885//endothelial cell development;GO:0001944//vasculature development;GO:0007507//heart development;GO:0035264//multicellular organism growth;GO:0045216//cell-cell junction organization;GO:0048839//inner ear development;GO:0048845//venous blood vessel morphogenesis;GO:0060039//pericar…
MergePeak_12048	3	110422206	110422923	0.00195	0.0992	106	87	93	69	52	46	2.700000	3.800000	6.490000	2.270000	1.480000	1.920000	4.330000	1.890000	-1.195981	Promoter (<=1kb)	110422644	110462909	40266	+	ENSBGRG00000004656	ENSBGRT00000008671	110422644	110442273	19630	+	ENSBGRG00000004656	ENSBGRT00000008864	-80	TMEM53	transmembrane protein 53 [Source:HGNC Symbol;Acc:HGNC:26186]	-	-	-	-	-	-	-
MergePeak_14069	6	63723947	63724660	0.00198	0.0992	105	77	66	54	47	42	2.690000	3.380000	4.630000	1.780000	1.340000	1.770000	3.570000	1.630000	-1.131052	Intron (ENSBGRT00000005060/ENSBGRG00000002693, intron 13 of 15)	63394360	63733104	338745	+	ENSBGRG00000002693	ENSBGRT00000005060	63394360	63733104	338745	+	ENSBGRG00000002693	ENSBGRT00000005060	329943	APBB2	amyloid beta precursor protein binding family B member 2 [Source:HGNC Symbol;Acc:HGNC:582]	-	-	-	-	GO:0005634//nucleus;GO:0005737//cytoplasm	GO:0001540//amyloid-beta binding;GO:0005515//protein binding;GO:0008134//transcription factor binding	GO:0001764//neuron migration;GO:0006355//regulation of transcription, DNA-templated;GO:0007050//cell cycle arrest;GO:0007411//axon guidance;GO:0030198//extracellular matrix organization;GO:0030308//negative regulation of cell growth;GO:0043065//positive regulation of apoptotic process;GO:0043066//negative regulation of apoptotic process
MergePeak_12851	4	116950482	116951019	0.00198	0.0992	75	44	43	36	21	23	2.550000	2.560000	4.010000	1.580000	0.800000	1.280000	3.040000	1.220000	-1.317190	Intron (ENSBGRT00000016387/ENSBGRG00000008948, intron 2 of 5)	116889108	116989571	100464	-	ENSBGRG00000008948	ENSBGRT00000016387	116889108	116989571	100464	-	ENSBGRG00000008948	ENSBGRT00000016387	38821	ASB4	ankyrin repeat and SOCS box containing 4 [Source:HGNC Symbol;Acc:HGNC:16009]	-	-	-	-	GO:0031462//Cul2-RING ubiquitin ligase complex;GO:0031466//Cul5-RING ubiquitin ligase complex	GO:0004842//ubiquitin-protein transferase activity;GO:0005515//protein binding;GO:0019899//enzyme binding;GO:0031625//ubiquitin protein ligase binding;GO:0061630//ubiquitin protein ligase activity	GO:0035556//intracellular signal transduction;GO:0051865//protein autoubiquitination;GO:2001214//positive regulation of vasculogenesis
MergePeak_7909	20	58933368	58934031	0.00207	0.0992	164	105	105	98	62	68	4.510000	4.960000	7.920000	3.480000	1.900000	3.070000	5.800000	2.820000	-1.040358	Promoter (<=1kb)	58904038	58933215	29178	-	ENSBGRG00000022434	ENSBGRT00000042145	58904293	58933215	28923	-	ENSBGRG00000022434	ENSBGRT00000042428	-484	AP2A1	adaptor related protein complex 2 subunit alpha 1 [Source:HGNC Symbol;Acc:HGNC:561]	Human Diseases;Cellular Processes;Organismal Systems;Organismal Systems	Neurodegenerative diseases;Transport and catabolism;Nervous system;Excretory system	ko05016//Huntington disease;ko04144//Endocytosis;ko04721//Synaptic vesicle cycle;ko04961//Endocrine and other factor-regulated calcium reabsorption	K11824;K11824;K11824;K11824	GO:0030117//membrane coat;GO:0030122//AP-2 adaptor complex;GO:0030131//clathrin adaptor complex;GO:0032433//filopodium tip	GO:0019901//protein kinase binding;GO:0035615//clathrin adaptor activity;GO:0050750//low-density lipoprotein particle receptor binding	GO:0006886//intracellular protein transport;GO:0015031//protein transport;GO:0016192//vesicle-mediated transport;GO:0072583//clathrin-dependent endocytosis;GO:1900126//negative regulation of hyaluronan biosynthetic process
MergePeak_16074	9	7442232	7442598	0.00214	0.0992	89	38	42	38	23	21	4.430000	3.250000	5.740000	2.450000	1.280000	1.720000	4.470000	1.820000	-1.296336	Intron (ENSBGRT00000015779/ENSBGRG00000008276, intron 1 of 8)	7418631	7457852	39222	+	ENSBGRG00000008276	ENSBGRT00000015779	7418631	7457852	39222	+	ENSBGRG00000008276	ENSBGRT00000015779	23784	SLC25A25	solute carrier family 25 member 25 [Source:HGNC Symbol;Acc:HGNC:20663]	-	-	-	-	GO:0005739//mitochondrion;GO:0005743//mitochondrial inner membrane	GO:0005509//calcium ion binding;GO:0022857//transmembrane transporter activity	GO:0002021//response to dietary excess;GO:0014823//response to activity;GO:0032094//response to food;GO:0035264//multicellular organism growth;GO:0043010//camera-type eye development;GO:0045333//cellular respiration;GO:0046034//ATP metabolic process;GO:0055085//transmembrane transport;GO:0060612//adipose tissue development;GO:0070588//calcium ion transmembrane transport
MergePeak_5872	19	2021263	2022124	0.00215	0.0992	143	57	99	52	44	59	3.030000	2.070000	5.750000	1.420000	1.040000	2.050000	3.620000	1.500000	-1.271027	Promoter (<=1kb)	1984921	2021099	36179	-	ENSBGRG00000020320	ENSBGRT00000037636	1984921	2021099	36179	-	ENSBGRG00000020320	ENSBGRT00000037636	-594	WIPI1	WD repeat domain, phosphoinositide interacting 1 [Source:HGNC Symbol;Acc:HGNC:25471]	Human Diseases;Human Diseases;Human Diseases;Cellular Processes;Human Diseases;Cellular Processes	Neurodegenerative diseases;Neurodegenerative diseases;Infectious diseases;Transport and catabolism;Neurodegenerative disease;Transport and catabolism	ko05010//Alzheimer disease;ko05016//Huntington disease;ko05131//Shigellosis;ko04140//Autophagy - animal;ko05017//Spinocerebellar ataxia;ko04136//Autophagy - other eukaryotes	K17908;K17908;K17908;K17908;K17908;K17908	GO:0000407//phagophore assembly site;GO:0000421//autophagosome membrane;GO:0005737//cytoplasm;GO:0005802//trans-Golgi network;GO:0010008//endosome membrane;GO:0034045//phagophore assembly site membrane	GO:0005102//signaling receptor binding;GO:0005515//protein binding;GO:0030331//estrogen receptor binding;GO:0032266//phosphatidylinositol-3-phosphate binding;GO:0050681//androgen receptor binding;GO:0080025//phosphatidylinositol-3,5-bisphosphate binding	GO:0000045//autophagosome assembly;GO:0006914//autophagy;GO:0009267//cellular response to starvation;GO:0048203//vesicle targeting, trans-Golgi to endosome
MergePeak_14238	6	109745047	109745903	0.00215	0.0992	126	67	52	57	40	37	2.680000	2.450000	3.040000	1.570000	0.950000	1.300000	2.720000	1.270000	-1.098778	5' UTR	109617098	109745963	128866	-	ENSBGRG00000006562	ENSBGRT00000012093	109617098	109745963	128866	-	ENSBGRG00000006562	ENSBGRT00000012093	488	PAPSS1	3'-phosphoadenosine 5'-phosphosulfate synthase 1 [Source:HGNC Symbol;Acc:HGNC:8603]	Metabolism;Metabolism;Metabolism;Metabolism;Metabolism	Global and overview maps;Nucleotide metabolism;Metabolism of other amino acids;Energy metabolism;Biosynthesis of other secondary metabolites	ko01100//Metabolic pathways;ko00230//Purine metabolism;ko00450//Selenocompound metabolism;ko00920//Sulfur metabolism;ko00261//Monobactam biosynthesis	K13811;K13811;K13811;K13811;K13811	-	GO:0004020//adenylylsulfate kinase activity;GO:0004781//sulfate adenylyltransferase (ATP) activity;GO:0005524//ATP binding;GO:0042803//protein homodimerization activity	GO:0000103//sulfate assimilation;GO:0050428//3'-phosphoadenosine 5'-phosphosulfate biosynthetic process
MergePeak_14163	6	89978599	89979250	0.00216	0.0992	67	55	38	31	33	22	1.880000	2.640000	2.920000	1.120000	1.030000	1.010000	2.480000	1.050000	-1.239951	Intron (ENSBGRT00000041576/ENSBGRG00000021778, intron 3 of 24)	89610181	90027608	417428	-	ENSBGRG00000021778	ENSBGRT00000041576	89610181	90027608	417428	-	ENSBGRG00000021778	ENSBGRT00000041576	48684	FAM13A	family with sequence similarity 13 member A [Source:HGNC Symbol;Acc:HGNC:19367]	-	-	-	-	-	-	GO:0007165//signal transduction
MergePeak_4577	16	48824851	48825449	0.0022	0.0992	95	42	37	24	32	30	2.900000	2.200000	3.100000	0.950000	1.090000	1.500000	2.730000	1.180000	-1.210114	Promoter (<=1kb)	48825381	48852734	27354	+	ENSBGRG00000005782	ENSBGRT00000010887	48825381	48852734	27354	+	ENSBGRG00000005782	ENSBGRT00000010887	-231	ANKLE2	ankyrin repeat and LEM domain containing 2 [Source:HGNC Symbol;Acc:HGNC:29101]	-	-	-	-	GO:0030176//integral component of endoplasmic reticulum membrane	GO:0051721//protein phosphatase 2A binding	GO:0007084//mitotic nuclear envelope reassembly;GO:0007417//central nervous system development;GO:0035307//positive regulation of protein dephosphorylation;GO:0042326//negative regulation of phosphorylation;GO:0043066//negative regulation of apoptotic process
MergePeak_72	1	28927913	28928845	0.00224	0.0992	110	68	53	49	45	38	2.150000	2.280000	2.850000	1.240000	0.980000	1.220000	2.430000	1.150000	-1.079322	Exon (ENSBGRT00000000122/ENSBGRG00000000070, exon 2 of 2)	28926188	28928863	2676	+	ENSBGRG00000000070	ENSBGRT00000000122	28926188	28928863	2676	+	ENSBGRG00000000070	ENSBGRT00000000122	2191	-	-	-	-	-	-	-	-	-
MergePeak_2131	11	84214908	84215695	0.00225	0.0992	115	80	90	65	53	50	2.660000	3.180000	5.720000	1.950000	1.370000	1.900000	3.850000	1.740000	-1.145771	Promoter (<=1kb)	84144940	84215086	70147	-	ENSBGRG00000017898	ENSBGRT00000033641	84152447	84215086	62640	-	ENSBGRG00000017898	ENSBGRT00000034816	-215	SEL1L	SEL1L adaptor subunit of ERAD E3 ubiquitin ligase [Source:HGNC Symbol;Acc:HGNC:10717]	Genetic Information Processing	Folding, sorting and degradation	ko04141//Protein processing in endoplasmic reticulum	K14026	GO:0000839//Hrd1p ubiquitin ligase ERAD-L complex;GO:0005783//endoplasmic reticulum;GO:0036513//Derlin-1 retrotranslocation complex	GO:0005515//protein binding	GO:0006641//triglyceride metabolic process;GO:0009306//protein secretion;GO:0030970//retrograde protein transport, ER to cytosol;GO:0034976//response to endoplasmic reticulum stress;GO:0036503//ERAD pathway
MergePeak_14214	6	104820719	104821496	0.00228	0.0992	120	59	74	46	55	43	2.820000	2.380000	4.770000	1.390000	1.440000	1.660000	3.320000	1.500000	-1.146221	Intron (ENSBGRT00000006345/ENSBGRG00000003301, intron 2 of 7)	104790687	104863743	73057	-	ENSBGRG00000003301	ENSBGRT00000006345	104790687	104863743	73057	-	ENSBGRG00000003301	ENSBGRT00000006345	42636	UBE2D3	NP_871622.1 ubiquitin-conjugating enzyme E2 D3 isoform 3 [Homo sapiens]	Human Diseases;Genetic Information Processing;Genetic Information Processing;Environmental Information Processing;Organismal Systems	Infectious diseases;Folding, sorting and degradation;Folding, sorting and degradation;Signal transduction;Immune system	ko05131//Shigellosis;ko04141//Protein processing in endoplasmic reticulum;ko04120//Ubiquitin mediated proteolysis;ko04013//MAPK signaling pathway - fly;ko04624//Toll and Imd signaling pathway	K06689;K06689;K06689;K06689;K06689	-	-	-
MergePeak_1707	11	28782898	28783645	0.00229	0.0992	100	55	52	43	34	35	2.440000	2.300000	3.480000	1.360000	0.930000	1.400000	2.740000	1.230000	-1.155518	Exon (ENSBGRT00000029319/ENSBGRG00000015937, exon 1 of 3)	28777534	28784283	6750	-	ENSBGRG00000015937	ENSBGRT00000029319	28777534	28784283	6750	-	ENSBGRG00000015937	ENSBGRT00000029319	1012	DNAAF2	dynein axonemal assembly factor 2 [Source:HGNC Symbol;Acc:HGNC:20188]	-	-	-	-	GO:0005737//cytoplasm;GO:0005829//cytosol	-	GO:0010033//response to organic substance;GO:0032526//response to retinoic acid;GO:0060285//cilium-dependent cell motility;GO:0070286//axonemal dynein complex assembly
MergePeak_10308	26	37138375	37138750	0.0023	0.0992	72	39	47	34	22	23	3.500000	3.260000	6.270000	2.140000	1.190000	1.840000	4.340000	1.720000	-1.335286	Intron (ENSBGRT00000049347/ENSBGRG00000026629, intron 2 of 5)	37122384	37156410	34027	+	ENSBGRG00000026629	ENSBGRT00000049347	37122384	37156410	34027	+	ENSBGRG00000026629	ENSBGRT00000049347	16178	TVP23A	trans-golgi network vesicle protein 23 homolog A [Source:HGNC Symbol;Acc:HGNC:20398]	-	-	-	-	GO:0016021//integral component of membrane	-	-
MergePeak_5066	17	36882073	36882612	0.00233	0.0992	93	85	49	46	44	39	3.150000	4.940000	4.550000	2.010000	1.660000	2.170000	4.210000	1.950000	-1.110346	Promoter (<=1kb)	36855873	36882049	26177	-	ENSBGRG00000005233	ENSBGRT00000009649	36855873	36882049	26177	-	ENSBGRG00000005233	ENSBGRT00000009649	-293	LOXL1	lysyl oxidase like 1 [Source:HGNC Symbol;Acc:HGNC:6665]	-	-	-	-	-	GO:0005507//copper ion binding;GO:0016641//oxidoreductase activity, acting on the CH-NH2 group of donors, oxygen as acceptor	GO:0055114//oxidation-reduction process
MergePeak_13788	6	1334853	1335579	0.00234	0.0992	101	51	67	45	48	30	2.540000	2.200000	4.620000	1.460000	1.340000	1.240000	3.120000	1.350000	-1.208587	Intron (ENSBGRT00000014892/ENSBGRG00000008121, intron 5 of 19)	1256174	1424138	167965	-	ENSBGRG00000008121	ENSBGRT00000014892	1256174	1424138	167965	-	ENSBGRG00000008121	ENSBGRT00000014892	88922	AFAP1	actin filament associated protein 1 [Source:HGNC Symbol;Acc:HGNC:24017]	-	-	-	-	GO:0005829//cytosol;GO:0005925//focal adhesion;GO:0015629//actin cytoskeleton	-	GO:0009966//regulation of signal transduction;GO:0051493//regulation of cytoskeleton organization
MergePeak_13405	5	80725644	80726206	0.00243	0.101	102	53	23	31	22	27	3.310000	2.950000	2.050000	1.300000	0.800000	1.440000	2.770000	1.180000	-1.231099	Intron (ENSBGRT00000004476/ENSBGRG00000002401, intron 8 of 10)	80724844	80739828	14985	-	ENSBGRG00000002401	ENSBGRT00000004476	80724844	80739828	14985	-	ENSBGRG00000002401	ENSBGRT00000004476	13903	SPRYD3	SPRY domain containing 3 [Source:HGNC Symbol;Acc:HGNC:25920]	-	-	-	-	-	GO:0005515//protein binding	-
MergePeak_14142	6	88358608	88359190	0.00254	0.101	131	75	76	53	39	60	4.100000	4.030000	6.530000	2.150000	1.360000	3.090000	4.890000	2.200000	-1.152331	Promoter (<=1kb)	88333496	88358712	25217	-	ENSBGRG00000020079	ENSBGRT00000037182	88333496	88358712	25217	-	ENSBGRG00000020079	ENSBGRT00000037182	-187	LAP3	leucine aminopeptidase 3 [Source:HGNC Symbol;Acc:HGNC:18449]	Metabolism;Metabolism;Metabolism	Global and overview maps;Metabolism of other amino acids;Amino acid metabolism	ko01100//Metabolic pathways;ko00480//Glutathione metabolism;ko00330//Arginine and proline metabolism	K11142;K11142;K11142	GO:0005654//nucleoplasm;GO:0005737//cytoplasm;GO:0005829//cytosol;GO:0030496//midbody	GO:0004177//aminopeptidase activity;GO:0008233//peptidase activity;GO:0008235//metalloexopeptidase activity;GO:0030145//manganese ion binding	GO:0006508//proteolysis;GO:0019538//protein metabolic process
MergePeak_13256	5	56209971	56210722	0.00254	0.101	105	74	71	63	50	34	2.550000	3.080000	4.730000	1.980000	1.350000	1.360000	3.450000	1.560000	-1.145050	Intron (ENSBGRT00000029596/ENSBGRG00000016102, intron 1 of 2)	56186104	56210661	24558	-	ENSBGRG00000016102	ENSBGRT00000029596	56186104	56210661	24558	-	ENSBGRG00000016102	ENSBGRT00000029596	315	C12orf66	chromosome 12 open reading frame 66 [Source:HGNC Symbol;Acc:HGNC:26517]	-	-	-	-	GO:0005764//lysosome;GO:0045171//intercellular bridge	-	-
MergePeak_11739	3	53304586	53305313	0.00256	0.101	123	64	65	51	56	41	3.090000	2.760000	4.470000	1.650000	1.570000	1.690000	3.440000	1.640000	-1.068713	Intron (ENSBGRT00000000359/ENSBGRG00000000221, intron 6 of 6)	53291077	53308452	17376	+	ENSBGRG00000000221	ENSBGRT00000000359	53291077	53308452	17376	+	ENSBGRG00000000221	ENSBGRT00000000359	13872	F3	coagulation factor III, tissue factor [Source:HGNC Symbol;Acc:HGNC:3541]	Human Diseases;Organismal Systems	Endocrine and metabolic diseases;Immune system	ko04933//AGE-RAGE signaling pathway in diabetic complications;ko04610//Complement and coagulation cascades	K03901;K03901	GO:0005615//extracellular space;GO:0009986//cell surface;GO:0016021//integral component of membrane;GO:0062023//collagen-containing extracellular matrix;GO:1905286//serine-type peptidase complex	GO:0002020//protease binding;GO:0004252//serine-type endopeptidase activity;GO:0005515//protein binding;GO:0005543//phospholipid binding	GO:0001938//positive regulation of endothelial cell proliferation;GO:0002541//activation of plasma proteins involved in acute inflammatory response;GO:0006919//activation of cysteine-type endopeptidase activity involved in apoptotic process;GO:0007596//blood coagulation;GO:0010641//positive regulation of platelet-derived growth factor receptor signaling pathway;GO:0016485//protein processing;GO:0…
MergePeak_15338	8	14677390	14678020	0.00258	0.101	150	89	109	46	51	87	4.340000	4.420000	8.660000	1.720000	1.650000	4.140000	5.810000	2.500000	-1.216610	Promoter (<=1kb)	14677947	14689728	11782	+	ENSBGRG00000001548	ENSBGRT00000002887	14677947	14688810	10864	+	ENSBGRG00000001548	ENSBGRT00000002902	-242	PIN1	peptidylprolyl cis/trans isomerase, NIMA-interacting 1 [Source:HGNC Symbol;Acc:HGNC:8988]	Organismal Systems	Immune system	ko04622//RIG-I-like receptor signaling pathway	K09578	GO:0005634//nucleus;GO:0005654//nucleoplasm;GO:0005737//cytoplasm;GO:0005829//cytosol;GO:0030496//midbody;GO:0098978//glutamatergic synapse;GO:0099524//postsynaptic cytosol	GO:0003755//peptidyl-prolyl cis-trans isomerase activity;GO:0005515//protein binding;GO:0008013//beta-catenin binding;GO:0016859//cis-trans isomerase activity;GO:0031434//mitogen-activated protein kinase kinase binding;GO:0032794//GTPase activating protein binding;GO:0050815//phosphoserine residue binding;GO:0050816//phosphothreonine residue binding	GO:0001666//response to hypoxia;GO:0001932//regulation of protein phosphorylation;GO:0001934//positive regulation of protein phosphorylation;GO:0010468//regulation of gene expression;GO:0030512//negative regulation of transforming growth factor beta receptor signaling pathway;GO:0031647//regulation of protein stability;GO:0032091//negative regulation of protein binding;GO:0032092//positive regula…
MergePeak_768	1	151299468	151300357	0.00261	0.101	95	81	62	58	31	40	1.950000	2.850000	3.490000	1.540000	0.710000	1.350000	2.760000	1.200000	-1.201634	Promoter (<=1kb)	151300511	151317278	16768	+	ENSBGRG00000008357	ENSBGRT00000015252	151300511	151316894	16384	+	ENSBGRG00000008357	ENSBGRT00000015300	-599	ASTE1	asteroid homolog 1 [Source:HGNC Symbol;Acc:HGNC:25021]	-	-	-	-	-	GO:0004518//nuclease activity	GO:0006281//DNA repair
MergePeak_10348	26	44886192	44886948	0.00264	0.101	62	59	45	22	42	26	1.500000	2.440000	2.980000	0.690000	1.130000	1.030000	2.310000	0.950000	-1.281893	Promoter (1-2kb)	44887837	44896528	8692	+	ENSBGRG00000023657	ENSBGRT00000043737	44887837	44896528	8692	+	ENSBGRG00000023657	ENSBGRT00000043737	-1267	ZNF200	NP_001077169.1 zinc finger protein 200 [Bos taurus]	Human Diseases	Infectious diseases	ko05168//Herpes simplex infection	K09228	-	GO:0003676//nucleic acid binding	-
MergePeak_11986	3	101644881	101645721	0.00272	0.101	82	62	61	46	28	36	1.780000	2.310000	3.630000	1.290000	0.680000	1.280000	2.570000	1.080000	-1.250737	Promoter (<=1kb)	101423406	101645154	221749	-	ENSBGRG00000003114	ENSBGRT00000005798	101511046	101645154	134109	-	ENSBGRG00000003114	ENSBGRT00000005908	-147	SCP2	sterol carrier protein 2 [Source:HGNC Symbol;Acc:HGNC:10606]	Metabolism;Cellular Processes;Organismal Systems;Metabolism;Metabolism;Metabolism	Global and overview maps;Transport and catabolism;Endocrine system;Global and overview maps;Lipid metabolism;Lipid metabolism	ko01100//Metabolic pathways;ko04146//Peroxisome;ko03320//PPAR signaling pathway;ko01212//Fatty acid metabolism;ko01040//Biosynthesis of unsaturated fatty acids;ko00120//Primary bile acid biosynthesis	K08764;K08764;K08764;K08764;K08764;K08764	GO:0005654//nucleoplasm;GO:0005777//peroxisome;GO:0032991//protein-containing complex;GO:0043231//intracellular membrane-bounded organelle	GO:0000062//fatty-acyl-CoA binding;GO:0003824//catalytic activity;GO:0005102//signaling receptor binding;GO:0015485//cholesterol binding;GO:0016747//transferase activity, transferring acyl groups other than amino-acyl groups;GO:0036042//long-chain fatty acyl-CoA binding;GO:0070538//oleic acid binding	GO:0007031//peroxisome organization;GO:0032385//positive regulation of intracellular cholesterol transport;GO:1901373//lipid hydroperoxide transport
MergePeak_1181	10	51286599	51287005	0.0028	0.101	86	57	41	21	32	39	3.860000	4.390000	5.050000	1.220000	1.600000	2.880000	4.430000	1.900000	-1.221307	5' UTR	51211292	51287014	75723	-	ENSBGRG00000009881	ENSBGRT00000018234	51211292	51287014	75723	-	ENSBGRG00000009881	ENSBGRT00000018234	212	WASF1	WASP family member 1 [Source:HGNC Symbol;Acc:HGNC:12732]	Human Diseases;Human Diseases;Cellular Processes;Human Diseases;Organismal Systems;Cellular Processes;Human Diseases	Infectious diseases;Infectious diseases;Cell motility;Infectious diseases;Immune system;Cellular community - eukaryotes;Cancers	ko05131//Shigellosis;ko05130//Pathogenic Escherichia coli infection;ko04810//Regulation of actin cytoskeleton;ko05100//Bacterial invasion of epithelial cells;ko04666//Fc gamma R-mediated phagocytosis;ko04520//Adherens junction;ko05231//Choline metabolism in cancer	K05753;K05753;K05753;K05753;K05753;K05753;K05753	GO:0005737//cytoplasm;GO:0005739//mitochondrion;GO:0005741//mitochondrial outer membrane;GO:0005856//cytoskeleton;GO:0030027//lamellipodium;GO:0031209//SCAR complex;GO:0032991//protein-containing complex;GO:0098794//postsynapse	GO:0003779//actin binding;GO:0048365//Rac GTPase binding;GO:0051018//protein kinase A binding	GO:0006898//receptor-mediated endocytosis;GO:0016601//Rac protein signal transduction;GO:0030036//actin cytoskeleton organization;GO:0031175//neuron projection development;GO:0051388//positive regulation of neurotrophin TRK receptor signaling pathway;GO:0072673//lamellipodium morphogenesis;GO:0097484//dendrite extension;GO:0098885//modification of postsynaptic actin cytoskeleton;GO:1990416//cellu…
MergePeak_4685	16	66482535	66483540	0.0028	0.101	206	84	98	77	48	84	3.740000	2.620000	4.880000	1.810000	0.970000	2.500000	3.750000	1.760000	-1.091315	Promoter (<=1kb)	66483500	66497589	14090	+	ENSBGRG00000015175	ENSBGRT00000027980	66483500	66497589	14090	+	ENSBGRG00000015175	ENSBGRT00000027980	-463	TBX3	T-box transcription factor 3 [Source:HGNC Symbol;Acc:HGNC:11602]	Cellular Processes	Cellular community - eukaryotes	ko04550//Signaling pathways regulating pluripotency of stem cells	K10177	GO:0005634//nucleus	GO:0000978//RNA polymerase II proximal promoter sequence-specific DNA binding;GO:0001085//RNA polymerase II transcription factor binding;GO:0001102//RNA polymerase II activating transcription factor binding;GO:0001227//DNA-binding transcription repressor activity, RNA polymerase II-specific;GO:0003700//DNA-binding transcription factor activity;GO:0043565//sequence-specific DNA binding	GO:0000122//negative regulation of transcription by RNA polymerase II;GO:0001501//skeletal system development;GO:0001568//blood vessel development;GO:0001701//in utero embryonic development;GO:0001947//heart looping;GO:0003007//heart morphogenesis;GO:0003151//outflow tract morphogenesis;GO:0003167//atrioventricular bundle cell differentiation;GO:0006355//regulation of transcription, DNA-templated…
MergePeak_4982	17	27634992	27635615	0.0028	0.101	89	57	58	55	37	19	2.610000	2.860000	4.660000	2.080000	1.210000	0.910000	3.380000	1.400000	-1.271596	Intron (ENSBGRT00000041623/ENSBGRG00000022496, intron 8 of 18)	27496629	27723681	227053	+	ENSBGRG00000022496	ENSBGRT00000041623	27496629	27723681	227053	+	ENSBGRG00000022496	ENSBGRT00000041623	138674	ARNT2	aryl hydrocarbon receptor nuclear translocator 2 [Source:HGNC Symbol;Acc:HGNC:16876]	Human Diseases;Human Diseases;Human Diseases	Cancers;Cancers;Cancers	ko05200//Pathways in cancer;ko05202//Transcriptional misregulation in cancers;ko05211//Renal cell carcinoma	K15589;K15589;K15589	GO:0005634//nucleus;GO:0005654//nucleoplasm;GO:0005667//transcription factor complex;GO:0005737//cytoplasm	GO:0000978//RNA polymerase II proximal promoter sequence-specific DNA binding;GO:0000981//DNA-binding transcription factor activity, RNA polymerase II-specific;GO:0001228//DNA-binding transcription activator activity, RNA polymerase II-specific;GO:0003700//DNA-binding transcription factor activity;GO:0017162//aryl hydrocarbon receptor binding;GO:0046982//protein heterodimerization activity;GO:004…	GO:0001666//response to hypoxia;GO:0001701//in utero embryonic development;GO:0006355//regulation of transcription, DNA-templated;GO:0007417//central nervous system development;GO:0007420//brain development;GO:0045893//positive regulation of transcription, DNA-templated;GO:0045944//positive regulation of transcription by RNA polymerase II
MergePeak_7942	20	60135031	60135434	0.00281	0.101	63	28	56	33	12	20	2.850000	2.170000	6.950000	1.930000	0.610000	1.490000	3.990000	1.340000	-1.574156	Promoter (<=1kb)	60129760	60135139	5380	-	ENSBGRG00000021592	ENSBGRT00000039853	60129760	60135139	5380	-	ENSBGRG00000021592	ENSBGRT00000039853	-93	GRWD1	glutamate rich WD repeat containing 1 [Source:HGNC Symbol;Acc:HGNC:21270]	-	-	-	-	GO:0005634//nucleus;GO:0005654//nucleoplasm;GO:0005730//nucleolus;GO:0005829//cytosol;GO:0032991//protein-containing complex	GO:0003682//chromatin binding;GO:0003688//DNA replication origin binding;GO:0005515//protein binding;GO:0042393//histone binding	GO:0006260//DNA replication;GO:0006334//nucleosome assembly;GO:0006337//nucleosome disassembly
MergePeak_10582	27	24817467	24818005	0.00286	0.101	71	41	48	32	26	26	2.410000	2.390000	4.460000	1.400000	0.980000	1.450000	3.090000	1.280000	-1.271463	Promoter (<=1kb)	24817804	24878197	60394	+	ENSBGRG00000011050	ENSBGRT00000020172	24817804	24877341	59538	+	ENSBGRG00000011050	ENSBGRT00000020250	-68	KIFBP	kinesin family binding protein [Source:HGNC Symbol;Acc:HGNC:23419]	-	-	-	-	GO:0005739//mitochondrion	GO:0005515//protein binding;GO:0019894//kinesin binding	GO:0001701//in utero embryonic development;GO:0006839//mitochondrial transport
MergePeak_16132	9	10877902	10878609	0.00288	0.101	119	72	95	62	34	57	3.070000	3.190000	6.720000	2.070000	0.980000	2.420000	4.330000	1.820000	-1.250429	Intron (ENSBGRT00000025399/ENSBGRG00000013023, intron 9 of 22)	10849911	10922555	72645	-	ENSBGRG00000013023	ENSBGRT00000025399	10849911	10922555	72645	-	ENSBGRG00000013023	ENSBGRT00000025399	44300	RAPGEF1	Rap guanine nucleotide exchange factor 1 [Source:HGNC Symbol;Acc:HGNC:4568]	Environmental Information Processing;Cellular Processes;Organismal Systems;Organismal Systems;Human Diseases	Signal transduction;Cellular community - eukaryotes;Endocrine system;Nervous system;Cancers	ko04015//Rap1 signaling pathway;ko04510//Focal adhesion;ko04910//Insulin signaling pathway;ko04722//Neurotrophin signaling pathway;ko05211//Renal cell carcinoma	K06277;K06277;K06277;K06277;K06277	GO:0005737//cytoplasm;GO:0005769//early endosome;GO:0043231//intracellular membrane-bounded organelle	GO:0005085//guanyl-nucleotide exchange factor activity;GO:0017034//Rap guanyl-nucleotide exchange factor activity	GO:0007264//small GTPase mediated signal transduction;GO:0010976//positive regulation of neuron projection development;GO:0032486//Rap protein signal transduction;GO:0038180//nerve growth factor signaling pathway;GO:0043547//positive regulation of GTPase activity;GO:0061028//establishment of endothelial barrier;GO:0071320//cellular response to cAMP;GO:1901888//regulation of cell junction assembly…
MergePeak_13790	6	1861324	1861991	0.00292	0.101	142	34	82	35	36	48	3.880000	1.600000	6.150000	1.240000	1.100000	2.160000	3.880000	1.500000	-1.371094	Intron (ENSBGRT00000018230/ENSBGRG00000009913, intron 18 of 19)	1857727	1920022	62296	-	ENSBGRG00000009913	ENSBGRT00000018230	1857727	1920022	62296	-	ENSBGRG00000009913	ENSBGRT00000018230	58365	ACOX3	acyl-CoA oxidase 3, pristanoyl [Source:HGNC Symbol;Acc:HGNC:121]	Metabolism;Environmental Information Processing;Metabolism;Cellular Processes;Organismal Systems;Metabolism;Metabolism;Metabolism;Metabolism;Metabolism;Metabolism	Global and overview maps;Signal transduction;Global and overview maps;Transport and catabolism;Endocrine system;Global and overview maps;Lipid metabolism;Carbohydrate metabolism;Metabolism of other amino acids;Lipid metabolism;Lipid metabolism	ko01100//Metabolic pathways;ko04024//cAMP signaling pathway;ko01200//Carbon metabolism;ko04146//Peroxisome;ko03320//PPAR signaling pathway;ko01212//Fatty acid metabolism;ko00071//Fatty acid degradation;ko00640//Propanoate metabolism;ko00410//beta-Alanine metabolism;ko00592//alpha-Linolenic acid metabolism;ko01040//Biosynthesis of unsaturated fatty acids	K00232;K00232;K00232;K00232;K00232;K00232;K00232;K00232;K00232;K00232;K00232	GO:0005777//peroxisome	GO:0003997//acyl-CoA oxidase activity;GO:0016627//oxidoreductase activity, acting on the CH-CH group of donors;GO:0071949//FAD binding	GO:0006631//fatty acid metabolic process;GO:0006635//fatty acid beta-oxidation;GO:0055114//oxidation-reduction process
MergePeak_16658	9	84404971	84405622	0.00297	0.101	132	95	98	86	56	57	3.700000	4.570000	7.530000	3.110000	1.750000	2.620000	5.270000	2.490000	-1.081657	Intron (ENSBGRT00000017772/ENSBGRG00000009676, intron 2 of 27)	84182012	84790090	608079	+	ENSBGRG00000009676	ENSBGRT00000017772	84182012	84790090	608079	+	ENSBGRG00000009676	ENSBGRT00000017772	223284	EHBP1	EH domain binding protein 1 [Source:HGNC Symbol;Acc:HGNC:29144]	-	-	-	-	GO:0005654//nucleoplasm;GO:0005829//cytosol;GO:0005886//plasma membrane	GO:0005515//protein binding	-
MergePeak_689	1	137549970	137550745	0.00308	0.101	94	45	53	27	33	39	2.210000	1.820000	3.420000	0.820000	0.870000	1.510000	2.480000	1.070000	-1.212729	Exon (ENSBGRT00000000536/ENSBGRG00000000286, exon 1 of 13)	137481771	137550461	68691	-	ENSBGRG00000000286	ENSBGRT00000000536	137481771	137550461	68691	-	ENSBGRG00000000286	ENSBGRT00000000536	104	TRPC1	transient receptor potential cation channel subfamily C member 1 [Source:HGNC Symbol;Acc:HGNC:12333]	Organismal Systems;Organismal Systems;Organismal Systems;Organismal Systems;Organismal Systems	Development;Nervous system;Nervous system;Digestive system;Endocrine system	ko04360//Axon guidance;ko04726//Serotonergic synapse;ko04724//Glutamatergic synapse;ko04972//Pancreatic secretion;ko04929//GnRH secretion	K04964;K04964;K04964;K04964;K04964	GO:0005886//plasma membrane;GO:0016020//membrane;GO:0016021//integral component of membrane;GO:0043235//receptor complex	GO:0005102//signaling receptor binding;GO:0005216//ion channel activity;GO:0005262//calcium channel activity;GO:0005515//protein binding;GO:0051117//ATPase binding;GO:0070679//inositol 1,4,5 trisphosphate binding	GO:0006811//ion transport;GO:0042438//melanin biosynthetic process;GO:0051281//positive regulation of release of sequestered calcium ion into cytosol;GO:0051480//regulation of cytosolic calcium ion concentration;GO:0051592//response to calcium ion;GO:0055085//transmembrane transport;GO:0070588//calcium ion transmembrane transport
MergePeak_13889	6	22372172	22372872	0.0031	0.101	88	72	83	36	59	46	2.290000	3.220000	5.930000	1.210000	1.710000	1.970000	3.810000	1.630000	-1.224919	Promoter (<=1kb)	22350648	22372510	21863	-	ENSBGRG00000022302	ENSBGRT00000041222	22350648	22372510	21863	-	ENSBGRG00000022302	ENSBGRT00000041222	-12	THAP9	THAP domain containing 9 [Source:HGNC Symbol;Acc:HGNC:23192]	-	-	-	-	-	GO:0003676//nucleic acid binding;GO:0004803//transposase activity;GO:0043565//sequence-specific DNA binding	GO:0006310//DNA recombination;GO:0006313//transposition, DNA-mediated;GO:0015074//DNA integration
MergePeak_478	1	95326345	95327639	0.0031	0.101	161	105	117	106	70	69	2.270000	2.540000	4.520000	1.930000	1.100000	1.600000	3.110000	1.540000	-1.013984	Intron (ENSBGRT00000005766/ENSBGRG00000003086, intron 1 of 13)	95293628	95327141	33514	-	ENSBGRG00000003086	ENSBGRT00000005766	95293628	95327141	33514	-	ENSBGRG00000003086	ENSBGRT00000005766	149	ACTL6A	actin like 6A [Source:HGNC Symbol;Acc:HGNC:24124]	Organismal Systems;Human Diseases	Environmental adaptation;Cancers	ko04714//Thermogenesis;ko05225//Hepatocellular carcinoma	K11340;K11340	GO:0005634//nucleus;GO:0005654//nucleoplasm;GO:0005886//plasma membrane;GO:0016514//SWI/SNF complex;GO:0031011//Ino80 complex;GO:0035267//NuA4 histone acetyltransferase complex;GO:0071564//npBAF complex	GO:0003682//chromatin binding	GO:0001825//blastocyst formation;GO:0003407//neural retina development;GO:0006338//chromatin remodeling;GO:0007399//nervous system development;GO:0043967//histone H4 acetylation;GO:0043968//histone H2A acetylation
MergePeak_12566	4	56554690	56555345	0.00316	0.101	111	52	59	39	39	43	3.090000	2.480000	4.510000	1.400000	1.210000	1.970000	3.360000	1.530000	-1.134930	Promoter (<=1kb)	56281078	56554772	273695	-	ENSBGRG00000002143	ENSBGRT00000004027	56440491	56554772	114282	-	ENSBGRG00000002143	ENSBGRT00000004073	-245	HIBADH	3-hydroxyisobutyrate dehydrogenase [Source:HGNC Symbol;Acc:HGNC:4907]	Metabolism;Metabolism	Global and overview maps;Amino acid metabolism	ko01100//Metabolic pathways;ko00280//Valine, leucine and isoleucine degradation	K00020;K00020	-	GO:0008442//3-hydroxyisobutyrate dehydrogenase activity;GO:0016491//oxidoreductase activity;GO:0050661//NADP binding;GO:0051287//NAD binding	GO:0006574//valine catabolic process;GO:0055114//oxidation-reduction process
MergePeak_4707	16	69574164	69574822	0.00319	0.101	87	63	39	37	39	31	2.410000	3.000000	2.970000	1.320000	1.210000	1.410000	2.790000	1.310000	-1.090698	Promoter (<=1kb)	69574803	69576633	1831	+	ENSBGRG00000026352	ENSBGRT00000048751	69574803	69576633	1831	+	ENSBGRG00000026352	ENSBGRT00000048751	-310	DYNLL1	KAF0879767.1 DYL1 protein, partial [Crocuta crocuta]	Human Diseases;Organismal Systems	Infectious diseases;Excretory system	ko05132//Salmonella infection;ko04962//Vasopressin-regulated water reabsorption	K10418;K10418	GO:0005875//microtubule associated complex;GO:0030286//dynein complex	-	GO:0007017//microtubule-based process
MergePeak_6405	19	45849279	45849731	0.0032	0.101	96	59	57	52	46	25	3.870000	4.090000	6.310000	2.710000	2.070000	1.660000	4.760000	2.150000	-1.146625	Intron (ENSBGRT00000020847/ENSBGRG00000011155, intron 2 of 10)	45830389	45850761	20373	-	ENSBGRG00000011155	ENSBGRT00000020847	45830389	45850761	20373	-	ENSBGRG00000011155	ENSBGRT00000020847	1256	WDR81	WD repeat domain 81 [Source:HGNC Symbol;Acc:HGNC:26600]	-	-	-	-	GO:0000421//autophagosome membrane;GO:0005739//mitochondrion;GO:0005765//lysosomal membrane;GO:0005829//cytosol;GO:0031313//extrinsic component of endosome membrane;GO:0031901//early endosome membrane;GO:0031902//late endosome membrane	GO:0005515//protein binding;GO:0035014//phosphatidylinositol 3-kinase regulator activity;GO:0070530//K63-linked polyubiquitin modification-dependent protein binding	GO:0006511//ubiquitin-dependent protein catabolic process;GO:0007005//mitochondrion organization;GO:0010923//negative regulation of phosphatase activity;GO:0035973//aggrephagy;GO:0043551//regulation of phosphatidylinositol 3-kinase activity;GO:0045022//early endosome to late endosome transport;GO:0050821//protein stabilization
MergePeak_8855	22	59611067	59611798	0.00321	0.101	128	40	37	33	35	32	3.190000	1.710000	2.530000	1.060000	0.970000	1.310000	2.480000	1.110000	-1.159780	Intron (ENSBGRT00000041425/ENSBGRG00000022405, intron 2 of 6)	59598406	59648674	50269	+	ENSBGRG00000022405	ENSBGRT00000041425	59598406	59648674	50269	+	ENSBGRG00000022405	ENSBGRT00000041425	13026	SUSD5	sushi domain containing 5 [Source:HGNC Symbol;Acc:HGNC:29061]	-	-	-	-	-	GO:0005540//hyaluronic acid binding	GO:0007155//cell adhesion;GO:0007219//Notch signaling pathway
MergePeak_7499	20	5475952	5476520	0.00323	0.101	85	28	47	30	21	25	2.730000	1.540000	4.140000	1.240000	0.750000	1.320000	2.800000	1.100000	-1.347923	Exon (ENSBGRT00000033024/ENSBGRG00000018053, exon 2 of 2)	5475066	5477785	2720	+	ENSBGRG00000018053	ENSBGRT00000033024	5475066	5477785	2720	+	ENSBGRG00000018053	ENSBGRT00000033024	1170	-	-	-	-	-	-	-	-	-
MergePeak_5934	19	8783947	8784257	0.00323	0.101	57	29	61	18	28	26	3.350000	2.930000	9.850000	1.370000	1.840000	2.510000	5.380000	1.910000	-1.494034	Promoter (<=1kb)	8777445	8783976	6532	-	ENSBGRG00000022262	ENSBGRT00000041465	8777591	8783976	6386	-	ENSBGRG00000022262	ENSBGRT00000041539	-126	WBP2	WW domain binding protein 2 [Source:HGNC Symbol;Acc:HGNC:12738]	-	-	-	-	GO:0000790//nuclear chromatin;GO:0005634//nucleus;GO:0005737//cytoplasm	GO:0000978//RNA polymerase II proximal promoter sequence-specific DNA binding;GO:0003713//transcription coactivator activity;GO:0030331//estrogen receptor binding;GO:0031490//chromatin DNA binding	GO:0032570//response to progesterone;GO:0033148//positive regulation of intracellular estrogen receptor signaling pathway;GO:0043627//response to estrogen;GO:0045184//establishment of protein localization;GO:0045815//positive regulation of gene expression, epigenetic;GO:0045944//positive regulation of transcription by RNA polymerase II;GO:0050847//progesterone receptor signaling pathway;GO:007139…
MergePeak_2614	12	59448196	59448831	0.00324	0.101	144	86	89	71	41	67	4.140000	4.240000	7.010000	2.630000	1.310000	3.160000	5.130000	2.370000	-1.114072	Exon (ENSBGRT00000023859/ENSBGRG00000013066, exon 1 of 1)	59447741	59448856	1116	-	ENSBGRG00000013066	ENSBGRT00000023859	59447741	59448856	1116	-	ENSBGRG00000013066	ENSBGRT00000023859	343	SCAND1	XP_006072513.2 SCAN domain-containing protein 1 [Bubalus bubalis]	-	-	-	-	-	GO:0003700//DNA-binding transcription factor activity	GO:0006355//regulation of transcription, DNA-templated
MergePeak_9467	24	33390051	33390584	0.00324	0.101	52	50	50	23	26	30	1.780000	2.940000	4.690000	1.020000	0.990000	1.690000	3.140000	1.230000	-1.352106	Intron (ENSBGRT00000046780/ENSBGRG00000024977, intron 10 of 43)	33311713	33414653	102941	-	ENSBGRG00000024977	ENSBGRT00000046780	33311713	33414653	102941	-	ENSBGRG00000024977	ENSBGRT00000046780	24336	DST	dystonin [Source:HGNC Symbol;Acc:HGNC:1090]	-	-	-	-	GO:0005856//cytoskeleton	GO:0005509//calcium ion binding;GO:0005515//protein binding;GO:0008017//microtubule binding;GO:0008092//cytoskeletal protein binding	GO:0007010//cytoskeleton organization
MergePeak_399	1	83845103	83845833	0.00328	0.101	71	47	41	39	24	21	1.770000	2.020000	2.810000	1.260000	0.670000	0.860000	2.200000	0.930000	-1.242201	Promoter (<=1kb)	83845662	84036378	190717	+	ENSBGRG00000000817	ENSBGRT00000001541	83845662	84036378	190717	+	ENSBGRG00000000817	ENSBGRT00000001541	-194	P3H2	prolyl 3-hydroxylase 2 [Source:HGNC Symbol;Acc:HGNC:19317]	-	-	-	-	GO:0005604//basement membrane;GO:0005654//nucleoplasm;GO:0005783//endoplasmic reticulum;GO:0005794//Golgi apparatus	GO:0005506//iron ion binding;GO:0005515//protein binding;GO:0016491//oxidoreductase activity;GO:0016705//oxidoreductase activity, acting on paired donors, with incorporation or reduction of molecular oxygen;GO:0019797//procollagen-proline 3-dioxygenase activity;GO:0031418//L-ascorbic acid binding	GO:0008285//negative regulation of cell proliferation;GO:0019511//peptidyl-proline hydroxylation;GO:0032963//collagen metabolic process;GO:0055114//oxidation-reduction process
MergePeak_3199	13	58312508	58313349	0.00328	0.101	128	49	53	35	42	44	2.780000	1.820000	3.150000	0.980000	1.020000	1.570000	2.580000	1.190000	-1.116409	Promoter (<=1kb)	58313851	58328311	14461	+	ENSBGRG00000021052	ENSBGRT00000039145	58313851	58328311	14461	+	ENSBGRG00000021052	ENSBGRT00000039145	-923	IFT46	intraflagellar transport 46 [Source:HGNC Symbol;Acc:HGNC:26146]	-	-	-	-	GO:0005737//cytoplasm;GO:0005813//centrosome;GO:0005929//cilium;GO:0030992//intraciliary transport particle B;GO:0031514//motile cilium	-	GO:0007224//smoothened signaling pathway;GO:0042073//intraciliary transport;GO:0060271//cilium assembly
MergePeak_15151	7	122927830	122928291	0.00331	0.101	106	45	49	50	29	25	4.190000	3.060000	5.320000	2.560000	1.280000	1.630000	4.190000	1.820000	-1.203012	Intron (ENSBGRT00000027809/ENSBGRG00000015017, intron 2 of 10)	122840979	123002633	161655	+	ENSBGRG00000015017	ENSBGRT00000027809	122840979	123002633	161655	+	ENSBGRG00000015017	ENSBGRT00000027809	87081	SH3RF1	SH3 domain containing ring finger 1 [Source:HGNC Symbol;Acc:HGNC:17650]	-	-	-	-	GO:0005829//cytosol	GO:0005515//protein binding;GO:0046872//metal ion binding;GO:0061630//ubiquitin protein ligase activity	GO:0006915//apoptotic process;GO:0043066//negative regulation of apoptotic process;GO:0043154//negative regulation of cysteine-type endopeptidase activity involved in apoptotic process;GO:0046328//regulation of JNK cascade;GO:0051865//protein autoubiquitination;GO:2001237//negative regulation of extrinsic apoptotic signaling pathway
MergePeak_11332	3	537585	537982	0.00334	0.101	68	50	41	40	19	22	3.120000	3.940000	5.170000	2.370000	0.970000	1.660000	4.080000	1.670000	-1.288721	Promoter (<=1kb)	528495	537554	9060	-	ENSBGRG00000007800	ENSBGRT00000014311	528495	537554	9060	-	ENSBGRG00000007800	ENSBGRT00000014571	-229	CRTC2	CREB regulated transcription coactivator 2 [Source:HGNC Symbol;Acc:HGNC:27301]	Environmental Information Processing;Human Diseases;Environmental Information Processing;Human Diseases;Organismal Systems	Signal transduction;Infectious diseases;Signal transduction;Endocrine and metabolic diseases;Endocrine system	ko04151//PI3K-Akt signaling pathway;ko05166//HTLV-I infection;ko04152//AMPK signaling pathway;ko04931//Insulin resistance;ko04922//Glucagon signaling pathway	K16333;K16333;K16333;K16333;K16333	GO:0005634//nucleus;GO:0005654//nucleoplasm;GO:0005737//cytoplasm	GO:0008140//cAMP response element binding protein binding	GO:0006094//gluconeogenesis;GO:0032793//positive regulation of CREB transcription factor activity;GO:0042593//glucose homeostasis;GO:0043970//histone H3-K9 acetylation;GO:0045944//positive regulation of transcription by RNA polymerase II;GO:0051289//protein homotetramerization;GO:1901998//toxin transport
MergePeak_15476	8	22765109	22765802	0.00336	0.101	127	96	84	77	57	57	3.340000	4.340000	6.070000	2.620000	1.670000	2.470000	4.580000	2.250000	-1.025423	Promoter (<=1kb)	22760552	22765220	4669	-	ENSBGRG00000001910	ENSBGRT00000003628	22760552	22765220	4669	-	ENSBGRG00000001910	ENSBGRT00000003660	-235	IZUMO4	IZUMO family member 4 [Source:HGNC Symbol;Acc:HGNC:26950]	-	-	-	-	-	-	-
MergePeak_11380	3	3269262	3269791	0.00339	0.101	74	54	43	45	25	21	2.550000	3.200000	4.070000	2.000000	0.960000	1.190000	3.270000	1.380000	-1.244622	Downstream (2-3kb)	3271917	3282228	10312	-	ENSBGRG00000006648	ENSBGRT00000012297	3263484	3265894	2411	-	ENSBGRG00000006610	ENSBGRT00000012206	-3632	HDGF	heparin binding growth factor [Source:HGNC Symbol;Acc:HGNC:4856]	-	-	-	-	GO:0005615//extracellular space;GO:0005634//nucleus;GO:0005654//nucleoplasm;GO:0017053//transcriptional repressor complex	GO:0001222//transcription corepressor binding;GO:0003714//transcription corepressor activity	GO:0000122//negative regulation of transcription by RNA polymerase II;GO:0009987//cellular process;GO:0098761//cellular response to interleukin-7
MergePeak_11080	29	8973694	8974437	0.0034	0.101	95	57	63	57	25	31	2.330000	2.400000	4.240000	1.810000	0.680000	1.250000	2.990000	1.250000	-1.258217	Downstream (1-2kb)	8970124	8971318	1195	+	ENSBGRG00000026230	ENSBGRT00000048526	8970124	8971318	1195	+	ENSBGRG00000026230	ENSBGRT00000048532	3941	FAU	ELR57560.1 Ubiquitin-like protein FUBI, partial [Bos mutus]	Genetic Information Processing	Translation	ko03010//Ribosome	K02983	GO:0005840//ribosome	GO:0003735//structural constituent of ribosome;GO:0005515//protein binding	GO:0006412//translation
MergePeak_13957	6	35042244	35043011	0.00342	0.101	104	50	69	38	29	47	2.470000	2.040000	4.500000	1.170000	0.770000	1.840000	3.000000	1.260000	-1.251539	Intron (ENSBGRT00000048856/ENSBGRG00000026393, intron 1 of 8)	35041829	35099257	57429	+	ENSBGRG00000026393	ENSBGRT00000048856	35041829	35099257	57429	+	ENSBGRG00000026393	ENSBGRT00000048856	798	GRSF1	G-rich RNA sequence binding factor 1 [Source:HGNC Symbol;Acc:HGNC:4610]	-	-	-	-	GO:0005739//mitochondrion;GO:0035770//ribonucleoprotein granule;GO:0042645//mitochondrial nucleoid	GO:0003676//nucleic acid binding;GO:0003723//RNA binding	GO:0000962//positive regulation of mitochondrial RNA catabolic process;GO:0006396//RNA processing;GO:0009952//anterior/posterior pattern specification;GO:0016331//morphogenesis of embryonic epithelium
MergePeak_240	1	62006008	62006682	0.00343	0.101	65	61	46	44	24	24	1.760000	2.830000	3.410000	1.540000	0.720000	1.070000	2.670000	1.110000	-1.266280	Exon (ENSBGRT00000001429/ENSBGRG00000000776, exon 6 of 8)	62002733	62038878	36146	-	ENSBGRG00000000776	ENSBGRT00000001429	62002733	62038878	36146	-	ENSBGRG00000000776	ENSBGRT00000001429	32533	CCDC80	coiled-coil domain containing 80 [Source:HGNC Symbol;Acc:HGNC:30649]	-	-	-	-	GO:0005604//basement membrane;GO:0005614//interstitial matrix;GO:0031012//extracellular matrix	GO:0001968//fibronectin binding;GO:0005539//glycosaminoglycan binding;GO:0008201//heparin binding	GO:0009617//response to bacterium;GO:0010811//positive regulation of cell-substrate adhesion;GO:0030198//extracellular matrix organization
MergePeak_1784	11	36651455	36652288	0.00347	0.101	88	45	43	35	34	28	1.930000	1.690000	2.580000	0.990000	0.830000	1.010000	2.070000	0.940000	-1.138898	Intron (ENSBGRT00000015074/ENSBGRG00000008178, intron 12 of 15)	36594913	36672611	77699	+	ENSBGRG00000008178	ENSBGRT00000015074	36594913	36672611	77699	+	ENSBGRG00000008178	ENSBGRT00000015074	56958	ICE2	interactor of little elongation complex ELL subunit 2 [Source:HGNC Symbol;Acc:HGNC:29885]	-	-	-	-	GO:0005634//nucleus;GO:0005654//nucleoplasm;GO:0005829//cytosol;GO:0008023//transcription elongation factor complex;GO:0015030//Cajal body;GO:0016604//nuclear body;GO:0035327//transcriptionally active chromatin;GO:0035363//histone locus body	-	GO:0042795//snRNA transcription by RNA polymerase II;GO:0042796//snRNA transcription by RNA polymerase III;GO:0045945//positive regulation of transcription by RNA polymerase III
MergePeak_16603	9	71222631	71223037	0.00348	0.101	61	58	62	45	23	28	2.740000	4.470000	7.640000	2.610000	1.150000	2.070000	4.950000	1.940000	-1.351372	Promoter (<=1kb)	71223024	71287586	64563	+	ENSBGRG00000004605	ENSBGRT00000008566	71223024	71287586	64563	+	ENSBGRG00000004605	ENSBGRT00000008566	-190	ST3GAL5	ST3 beta-galactoside alpha-2,3-sialyltransferase 5 [Source:HGNC Symbol;Acc:HGNC:10872]	Metabolism;Metabolism	Global and overview maps;Glycan biosynthesis and metabolism	ko01100//Metabolic pathways;ko00604//Glycosphingolipid biosynthesis - ganglio series	K03370;K03370	-	GO:0008373//sialyltransferase activity;GO:0047291//lactosylceramide alpha-2,3-sialyltransferase activity	GO:0006486//protein glycosylation
MergePeak_7750	20	44967090	44967766	0.00348	0.101	99	50	59	59	31	19	2.670000	2.320000	4.370000	2.060000	0.930000	0.840000	3.120000	1.280000	-1.285402	Promoter (<=1kb)	43911341	44967179	1055839	-	ENSBGRG00000023828	ENSBGRT00000044342	44789334	44967179	177846	-	ENSBGRG00000023828	ENSBGRT00000044408	-249	WWOX	WW domain containing oxidoreductase [Source:HGNC Symbol;Acc:HGNC:12799]	-	-	-	-	GO:0005634//nucleus;GO:0005654//nucleoplasm;GO:0005737//cytoplasm;GO:0005739//mitochondrion;GO:0005794//Golgi apparatus;GO:0005829//cytosol;GO:0005886//plasma membrane;GO:0005902//microvillus;GO:0090575//RNA polymerase II transcription factor complex	GO:0003713//transcription coactivator activity;GO:0005515//protein binding;GO:0019899//enzyme binding	GO:0001649//osteoblast differentiation;GO:0030178//negative regulation of Wnt signaling pathway;GO:0045944//positive regulation of transcription by RNA polymerase II;GO:0048705//skeletal system morphogenesis;GO:0071560//cellular response to transforming growth factor beta stimulus;GO:0072332//intrinsic apoptotic signaling pathway by p53 class mediator;GO:0097191//extrinsic apoptotic signaling pat…
MergePeak_9085	23	48039736	48040294	0.00349	0.101	77	59	26	35	21	24	2.520000	3.310000	2.330000	1.480000	0.770000	1.290000	2.720000	1.180000	-1.204820	Intron (ENSBGRT00000044175/ENSBGRG00000023892, intron 7 of 18)	48008194	48191655	183462	-	ENSBGRG00000023892	ENSBGRT00000044175	48008194	48191655	183462	-	ENSBGRG00000023892	ENSBGRT00000044175	151640	FYB1	FYN binding protein 1 [Source:HGNC Symbol;Acc:HGNC:4036]	Environmental Information Processing;Human Diseases	Signal transduction;Infectious disease: bacterial	ko04015//Rap1 signaling pathway;ko05135//Yersinia infection	K17698;K17698	GO:0005886//plasma membrane;GO:0015629//actin cytoskeleton;GO:0032991//protein-containing complex	GO:0005515//protein binding;GO:0008289//lipid binding	GO:0006955//immune response;GO:0072659//protein localization to plasma membrane
MergePeak_7254	2	107844216	107844834	0.0035	0.101	85	42	63	36	48	23	2.510000	2.130000	5.100000	1.370000	1.580000	1.120000	3.250000	1.360000	-1.256833	Exon (ENSBGRT00000017570/ENSBGRG00000009591, exon 2 of 2)	107843019	107845156	2138	+	ENSBGRG00000009591	ENSBGRT00000017570	107843019	107845156	2138	+	ENSBGRG00000009591	ENSBGRT00000017570	1506	-	-	-	-	-	-	-	-	-
MergePeak_14041	6	56874721	56875396	0.00356	0.101	105	35	42	39	33	21	2.840000	1.620000	3.110000	1.360000	0.990000	0.930000	2.520000	1.090000	-1.209096	Intron (ENSBGRT00000002907/ENSBGRG00000001566, intron 5 of 8)	56774414	57264613	490200	-	ENSBGRG00000001566	ENSBGRT00000002907	56774414	57264613	490200	-	ENSBGRG00000001566	ENSBGRT00000002907	389555	GABRB1	gamma-aminobutyric acid type A receptor beta1 subunit [Source:HGNC Symbol;Acc:HGNC:4081]	Environmental Information Processing;Organismal Systems;Organismal Systems;Organismal Systems;Human Diseases;Human Diseases	Signaling molecules and interaction;Nervous system;Nervous system;Nervous system;Substance dependence;Substance dependence	ko04080//Neuroactive ligand-receptor interaction;ko04723//Retrograde endocannabinoid signaling;ko04726//Serotonergic synapse;ko04727//GABAergic synapse;ko05032//Morphine addiction;ko05033//Nicotine addiction	K05181;K05181;K05181;K05181;K05181;K05181	GO:0005886//plasma membrane;GO:0016020//membrane;GO:0016021//integral component of membrane;GO:1902711//GABA-A receptor complex	GO:0004888//transmembrane signaling receptor activity;GO:0004890//GABA-A receptor activity;GO:0005216//ion channel activity;GO:0005230//extracellular ligand-gated ion channel activity;GO:0022851//GABA-gated chloride ion channel activity	GO:0006811//ion transport;GO:0007214//gamma-aminobutyric acid signaling pathway;GO:0034220//ion transmembrane transport;GO:1902476//chloride transmembrane transport
MergePeak_13182	5	47487778	47488271	0.00356	0.101	53	44	48	26	15	29	1.960000	2.790000	4.870000	1.240000	0.620000	1.760000	3.210000	1.210000	-1.407566	Intron (ENSBGRT00000001082/ENSBGRG00000000563, intron 1 of 11)	47479018	47489316	10299	-	ENSBGRG00000000563	ENSBGRT00000001082	47479018	47489316	10299	-	ENSBGRG00000000563	ENSBGRT00000001082	1292	PMEL	premelanosome protein [Source:HGNC Symbol;Acc:HGNC:10880]	-	-	-	-	GO:0005783//endoplasmic reticulum;GO:0005789//endoplasmic reticulum membrane;GO:0005794//Golgi apparatus;GO:0032585//multivesicular body membrane;GO:0042470//melanosome	GO:0042802//identical protein binding	GO:0032438//melanosome organization
MergePeak_4586	16	49739267	49739695	0.00356	0.101	67	51	35	31	21	27	2.850000	3.730000	4.090000	1.710000	1.000000	1.890000	3.560000	1.530000	-1.218346	Promoter (<=1kb)	49704900	49739216	34317	-	ENSBGRG00000008006	ENSBGRT00000014880	49704900	49739216	34317	-	ENSBGRG00000008006	ENSBGRT00000014880	-265	MMP17	matrix metallopeptidase 17 [Source:HGNC Symbol;Acc:HGNC:7163]	Organismal Systems	Endocrine system	ko04928//Parathyroid hormone synthesis, secretion and action	K07997	GO:0031012//extracellular matrix	GO:0004222//metalloendopeptidase activity;GO:0008237//metallopeptidase activity;GO:0008270//zinc ion binding	GO:0006508//proteolysis
MergePeak_15623	8	48133436	48134028	0.00358	0.101	62	63	43	29	31	32	1.910000	3.330000	3.630000	1.150000	1.070000	1.620000	2.960000	1.280000	-1.209453	5' UTR	48133310	48141670	8361	+	ENSBGRG00000000468	ENSBGRT00000000801	48133310	48134517	1208	+	ENSBGRG00000000468	ENSBGRT00000000828	422	UQCRQ	XP_006050618.1 cytochrome b-c1 complex subunit 8 [Bubalus bubalis]	Metabolism;Human Diseases;Human Diseases;Organismal Systems;Human Diseases;Metabolism;Human Diseases;Organismal Systems	Global and overview maps;Neurodegenerative diseases;Neurodegenerative diseases;Environmental adaptation;Endocrine and metabolic diseases;Energy metabolism;Neurodegenerative diseases;Circulatory system	ko01100//Metabolic pathways;ko05010//Alzheimer disease;ko05016//Huntington disease;ko04714//Thermogenesis;ko04932//Non-alcoholic fatty liver disease (NAFLD);ko00190//Oxidative phosphorylation;ko05012//Parkinson disease;ko04260//Cardiac muscle contraction	K00418;K00418;K00418;K00418;K00418;K00418;K00418;K00418	-	GO:0008121//ubiquinol-cytochrome-c reductase activity	-
MergePeak_2702	12	73322634	73323321	0.0036	0.101	55	47	46	23	28	28	1.460000	2.140000	3.350000	0.790000	0.830000	1.220000	2.320000	0.950000	-1.288125	Intron (ENSBGRT00000046984/ENSBGRG00000025331, intron 2 of 21)	73322663	73344291	21629	+	ENSBGRG00000025331	ENSBGRT00000046984	73322663	73344291	21629	+	ENSBGRG00000025331	ENSBGRT00000046984	314	DDX27	DEAD-box helicase 27 [Source:HGNC Symbol;Acc:HGNC:15837]	-	-	-	-	GO:0005694//chromosome;GO:0005730//nucleolus	GO:0003676//nucleic acid binding;GO:0005524//ATP binding	GO:0006364//rRNA processing
MergePeak_13156	5	45277781	45278237	0.00379	0.105	102	40	60	42	27	35	4.080000	2.750000	6.580000	2.170000	1.200000	2.300000	4.470000	1.890000	-1.241889	Intron (ENSBGRT00000011406/ENSBGRG00000006178, intron 1 of 2)	45248708	45293733	45026	-	ENSBGRG00000006178	ENSBGRT00000011406	45248708	45293733	45026	-	ENSBGRG00000006178	ENSBGRT00000011406	15724	ELK3	ETS transcription factor ELK3 [Source:HGNC Symbol;Acc:HGNC:3325]	-	-	-	-	GO:0005634//nucleus;GO:0005654//nucleoplasm;GO:0005739//mitochondrion	GO:0000978//RNA polymerase II proximal promoter sequence-specific DNA binding;GO:0001227//DNA-binding transcription repressor activity, RNA polymerase II-specific;GO:0001228//DNA-binding transcription activator activity, RNA polymerase II-specific;GO:0003677//DNA binding;GO:0003700//DNA-binding transcription factor activity;GO:0032422//purine-rich negative regulatory element binding;GO:0043565//s…	GO:0001525//angiogenesis;GO:0006355//regulation of transcription, DNA-templated;GO:0042060//wound healing;GO:0045892//negative regulation of transcription, DNA-templated;GO:0045944//positive regulation of transcription by RNA polymerase II
MergePeak_3571	14	37816379	37816990	0.00383	0.105	81	47	35	26	33	29	2.420000	2.410000	2.870000	1.000000	1.100000	1.420000	2.570000	1.170000	-1.135260	Intron (ENSBGRT00000013806/ENSBGRG00000007466, intron 1 of 4)	37792345	37843624	51280	+	ENSBGRG00000007466	ENSBGRT00000013806	37792345	37843624	51280	+	ENSBGRG00000007466	ENSBGRT00000013806	24339	DHRS3	dehydrogenase/reductase 3 [Source:HGNC Symbol;Acc:HGNC:17693]	Metabolism;Metabolism	Global and overview maps;Metabolism of cofactors and vitamins	ko01100//Metabolic pathways;ko00830//Retinol metabolism	K11146;K11146	-	GO:0004745//retinol dehydrogenase activity	GO:0042572//retinol metabolic process
MergePeak_13429	5	82055604	82056433	0.00385	0.105	135	69	60	67	50	39	2.970000	2.610000	3.620000	1.900000	1.230000	1.410000	3.070000	1.510000	-1.023690	Promoter (<=1kb)	82056229	82078937	22709	+	ENSBGRG00000004245	ENSBGRT00000008028	82056229	82078463	22235	+	ENSBGRG00000004245	ENSBGRT00000008298	-211	COPZ1	XP_014335723.1 PREDICTED: coatomer subunit zeta-1 isoform X1 [Bos mutus]	-	-	-	-	GO:0030117//membrane coat;GO:0030126//COPI vesicle coat	-	GO:0006886//intracellular protein transport;GO:0006890//retrograde vesicle-mediated transport, Golgi to ER;GO:0016192//vesicle-mediated transport
MergePeak_12228	3	131100224	131100777	0.00391	0.105	63	39	49	36	25	20	2.080000	2.210000	4.430000	1.530000	0.920000	1.080000	2.910000	1.180000	-1.302232	Promoter (<=1kb)	131100631	131102402	1772	+	ENSBGRG00000000259	ENSBGRT00000000405	131100631	131102402	1772	+	ENSBGRG00000000259	ENSBGRT00000000405	-131	DUSP28	dual specificity phosphatase 28 [Source:HGNC Symbol;Acc:HGNC:33237]	-	-	-	-	-	GO:0008138//protein tyrosine/serine/threonine phosphatase activity;GO:0016791//phosphatase activity	GO:0006470//protein dephosphorylation;GO:0016311//dephosphorylation
MergePeak_16093	9	8219097	8219630	0.00398	0.106	83	43	38	34	16	29	2.840000	2.530000	3.570000	1.500000	0.610000	1.630000	2.980000	1.250000	-1.253384	Intron (ENSBGRT00000029317/ENSBGRG00000015966, intron 1 of 3)	8205308	8231428	26121	+	ENSBGRG00000015966	ENSBGRT00000029317	8205308	8231428	26121	+	ENSBGRG00000015966	ENSBGRT00000029317	14055	LRRC8A	leucine rich repeat containing 8 VRAC subunit A [Source:HGNC Symbol;Acc:HGNC:19027]	-	-	-	-	GO:0005886//plasma membrane;GO:0009986//cell surface;GO:0034702//ion channel complex	GO:0005225//volume-sensitive anion channel activity;GO:0005253//anion channel activity;GO:0005515//protein binding;GO:0042802//identical protein binding	GO:0006820//anion transport;GO:0006884//cell volume homeostasis;GO:0006970//response to osmotic stress;GO:0098656//anion transmembrane transport
MergePeak_8031	20	64985726	64986521	0.00405	0.107	141	78	48	36	69	48	3.230000	3.070000	3.020000	1.070000	1.770000	1.810000	3.110000	1.550000	-1.004646	Promoter (1-2kb)	64974613	64984401	9789	-	ENSBGRG00000017191	ENSBGRT00000031723	64974613	64984401	9789	-	ENSBGRG00000017191	ENSBGRT00000031723	-1722	GSK3A	XP_027371474.1 glycogen synthase kinase-3 alpha [Bos indicus x Bos taurus]	Human Diseases;Human Diseases;Organismal Systems;Organismal Systems	Infectious diseases;Endocrine and metabolic diseases;Immune system;Nervous system	ko05131//Shigellosis;ko04932//Non-alcoholic fatty liver disease (NAFLD);ko04062//Chemokine signaling pathway;ko04728//Dopaminergic synapse	K08822;K08822;K08822;K08822	-	GO:0004672//protein kinase activity;GO:0004674//protein serine/threonine kinase activity;GO:0005102//signaling receptor binding;GO:0005524//ATP binding	GO:0003073//regulation of systemic arterial blood pressure;GO:0003214//cardiac left ventricle morphogenesis;GO:0006349//regulation of gene expression by genetic imprinting;GO:0006468//protein phosphorylation;GO:0008286//insulin receptor signaling pathway;GO:0010508//positive regulation of autophagy;GO:0010628//positive regulation of gene expression;GO:0010800//positive regulation of peptidyl-thre…
MergePeak_15438	8	21121049	21121692	0.00405	0.107	79	64	47	45	40	27	2.240000	3.120000	3.660000	1.650000	1.270000	1.260000	3.010000	1.390000	-1.114679	Promoter (<=1kb)	21121469	21135775	14307	+	ENSBGRG00000019101	ENSBGRT00000035096	21121469	21135775	14307	+	ENSBGRG00000019101	ENSBGRT00000035096	-99	DAPK3	death associated protein kinase 3 [Source:HGNC Symbol;Acc:HGNC:2676]	Human Diseases;Cellular Processes;Human Diseases	Cancers;Transport and catabolism;Cancers	ko05200//Pathways in cancer;ko04140//Autophagy - animal;ko05219//Bladder cancer	K08803;K08803;K08803	GO:0005634//nucleus;GO:0005654//nucleoplasm;GO:0016605//PML body	GO:0004672//protein kinase activity;GO:0004674//protein serine/threonine kinase activity;GO:0005524//ATP binding;GO:0017048//Rho GTPase binding;GO:0042802//identical protein binding;GO:0042803//protein homodimerization activity;GO:0043522//leucine zipper domain binding	GO:0006468//protein phosphorylation;GO:0006915//apoptotic process;GO:0007346//regulation of mitotic cell cycle;GO:0008360//regulation of cell shape;GO:0017148//negative regulation of translation;GO:0030335//positive regulation of cell migration;GO:0035556//intracellular signal transduction;GO:0043065//positive regulation of apoptotic process;GO:0043519//regulation of myosin II filament organizati…
MergePeak_324	1	75045969	75046719	0.00408	0.107	95	62	56	32	53	40	2.310000	2.590000	3.740000	1.010000	1.440000	1.600000	2.880000	1.350000	-1.093109	Intron (ENSBGRT00000020371/ENSBGRG00000011141, intron 11 of 11)	75031197	75173032	141836	-	ENSBGRG00000011141	ENSBGRT00000020371	75031197	75173032	141836	-	ENSBGRG00000011141	ENSBGRT00000020371	126688	ITGB5	integrin subunit beta 5 [Source:HGNC Symbol;Acc:HGNC:6160]	Environmental Information Processing;Human Diseases;Cellular Processes;Human Diseases;Cellular Processes;Cellular Processes;Human Diseases;Human Diseases;Human Diseases;Environmental Information Processing	Signal transduction;Infectious diseases;Cell motility;Cancers;Cellular community - eukaryotes;Transport and catabolism;Cardiovascular diseases;Cardiovascular diseases;Cardiovascular diseases;Signaling molecules and interaction	ko04151//PI3K-Akt signaling pathway;ko05165//Human papillomavirus infection;ko04810//Regulation of actin cytoskeleton;ko05205//Proteoglycans in cancer;ko04510//Focal adhesion;ko04145//Phagosome;ko05414//Dilated cardiomyopathy (DCM);ko05412//Arrhythmogenic right ventricular cardiomyopathy (ARVC);ko05410//Hypertrophic cardiomyopathy (HCM);ko04512//ECM-receptor interaction	K06588;K06588;K06588;K06588;K06588;K06588;K06588;K06588;K06588;K06588	GO:0008305//integrin complex;GO:0009986//cell surface;GO:0034684//integrin alphav-beta5 complex;GO:0043235//receptor complex	GO:0038023//signaling receptor activity	GO:0007160//cell-matrix adhesion;GO:0007179//transforming growth factor beta receptor signaling pathway;GO:0007229//integrin-mediated signaling pathway;GO:0035987//endodermal cell differentiation;GO:0043149//stress fiber assembly;GO:0090136//epithelial cell-cell adhesion
MergePeak_16870	9	112934235	112934670	0.00409	0.107	54	46	55	28	29	28	2.260000	3.310000	6.330000	1.520000	1.360000	1.930000	3.970000	1.600000	-1.311067	5' UTR	112934150	112961634	27485	+	ENSBGRG00000024734	ENSBGRT00000045726	112934150	112961634	27485	+	ENSBGRG00000024734	ENSBGRT00000045726	302	Pdia6	NP_001193274.1 protein disulfide-isomerase A6 precursor [Bos taurus]	Genetic Information Processing	Folding, sorting and degradation	ko04141//Protein processing in endoplasmic reticulum	K09584	-	GO:0016853//isomerase activity	GO:0045454//cell redox homeostasis
MergePeak_641	1	127988823	127989426	0.00414	0.108	72	42	47	40	22	23	2.180000	2.180000	3.900000	1.560000	0.740000	1.140000	2.750000	1.150000	-1.257798	5' UTR	127961063	127989239	28177	-	ENSBGRG00000014779	ENSBGRT00000027242	127961063	127989239	28177	-	ENSBGRG00000014779	ENSBGRT00000027242	115	SELENOT	selenoprotein T [Source:HGNC Symbol;Acc:HGNC:18136]	-	-	-	-	GO:0005783//endoplasmic reticulum	-	GO:0009749//response to glucose;GO:0031016//pancreas development;GO:0035773//insulin secretion involved in cellular response to glucose stimulus;GO:0042593//glucose homeostasis;GO:0045454//cell redox homeostasis
MergePeak_10195	26	18088991	18089710	0.00414	0.108	77	62	59	43	30	38	1.950000	2.700000	4.110000	1.410000	0.850000	1.580000	2.920000	1.280000	-1.189825	Promoter (<=1kb)	18085061	18088678	3618	-	ENSBGRG00000026100	ENSBGRT00000048299	18085147	18088678	3532	-	ENSBGRG00000026100	ENSBGRT00000048319	-672	CDIPT	CDP-diacylglycerol--inositol 3-phosphatidyltransferase [Source:HGNC Symbol;Acc:HGNC:1769]	Metabolism;Metabolism;Environmental Information Processing;Metabolism	Global and overview maps;Lipid metabolism;Signal transduction;Carbohydrate metabolism	ko01100//Metabolic pathways;ko00564//Glycerophospholipid metabolism;ko04070//Phosphatidylinositol signaling system;ko00562//Inositol phosphate metabolism	K00999;K00999;K00999;K00999	GO:0016020//membrane;GO:0016021//integral component of membrane	GO:0003881//CDP-diacylglycerol-inositol 3-phosphatidyltransferase activity;GO:0016780//phosphotransferase activity, for other substituted phosphate groups	GO:0006661//phosphatidylinositol biosynthetic process;GO:0008654//phospholipid biosynthetic process
MergePeak_16750	9	95739118	95739438	0.00425	0.108	71	55	43	40	27	27	4.050000	5.380000	6.720000	2.940000	1.720000	2.530000	5.380000	2.400000	-1.164572	Promoter (<=1kb)	95717060	95738648	21589	-	ENSBGRG00000006787	ENSBGRT00000012534	95717060	95738648	21589	-	ENSBGRG00000006787	ENSBGRT00000012534	-630	FOSL2	FOS like 2, AP-1 transcription factor subunit [Source:HGNC Symbol;Acc:HGNC:3798]	Organismal Systems	Development	ko04380//Osteoclast differentiation	K09030	GO:0005634//nucleus;GO:0005654//nucleoplasm	GO:0000977//RNA polymerase II regulatory region sequence-specific DNA binding;GO:0001228//DNA-binding transcription activator activity, RNA polymerase II-specific;GO:0003677//DNA binding;GO:0003682//chromatin binding;GO:0003700//DNA-binding transcription factor activity	GO:0003334//keratinocyte development;GO:0006355//regulation of transcription, DNA-templated;GO:0006357//regulation of transcription by RNA polymerase II;GO:0045893//positive regulation of transcription, DNA-templated;GO:0045944//positive regulation of transcription by RNA polymerase II;GO:0048146//positive regulation of fibroblast proliferation
MergePeak_8687	22	29626662	29627430	0.00429	0.108	136	70	103	75	62	54	3.230000	2.850000	6.710000	2.300000	1.640000	2.110000	4.260000	2.020000	-1.076498	Promoter (<=1kb)	29627129	29638173	11045	+	ENSBGRG00000014548	ENSBGRT00000026783	29627129	29638173	11045	+	ENSBGRG00000014548	ENSBGRT00000026783	-83	KBTBD8	kelch repeat and BTB domain containing 8 [Source:HGNC Symbol;Acc:HGNC:30691]	-	-	-	-	GO:0031463//Cul3-RING ubiquitin ligase complex	GO:0005515//protein binding	GO:0006513//protein monoubiquitination;GO:0014029//neural crest formation;GO:0014032//neural crest cell development
MergePeak_13608	5	110995218	110995873	0.00434	0.108	104	105	87	67	44	64	2.900000	5.020000	6.650000	2.410000	1.370000	2.930000	4.860000	2.240000	-1.117458	Promoter (<=1kb)	110995911	111003139	7229	+	ENSBGRG00000001169	ENSBGRT00000002229	110995911	111001606	5696	+	ENSBGRG00000001169	ENSBGRT00000002246	-366	VAMP1	vesicle associated membrane protein 1 [Source:HGNC Symbol;Acc:HGNC:12642]	Genetic Information Processing	Folding, sorting and degradation	ko04130//SNARE interactions in vesicular transport	K08510	GO:0009986//cell surface;GO:0016021//integral component of membrane;GO:0031594//neuromuscular junction;GO:0035579//specific granule membrane;GO:0070821//tertiary granule membrane;GO:0098978//glutamatergic synapse	-	GO:0016082//synaptic vesicle priming;GO:0016192//vesicle-mediated transport;GO:0031630//regulation of synaptic vesicle fusion to presynaptic active zone membrane;GO:0035493//SNARE complex assembly
MergePeak_4705	16	69522014	69522341	0.00434	0.108	70	36	47	42	23	13	3.900000	3.450000	7.190000	3.030000	1.430000	1.190000	4.850000	1.880000	-1.367252	Exon (ENSBGRT00000048725/ENSBGRG00000026336, exon 1 of 3)	69522141	69523977	1837	+	ENSBGRG00000026336	ENSBGRT00000048725	69522141	69523977	1837	+	ENSBGRG00000026336	ENSBGRT00000048725	36	COX6A1	NP_001071299.1 cytochrome c oxidase subunit 6A1, mitochondrial precursor [Bos taurus]	Metabolism;Human Diseases;Human Diseases;Organismal Systems;Human Diseases;Metabolism;Human Diseases;Organismal Systems	Global and overview maps;Neurodegenerative diseases;Neurodegenerative diseases;Environmental adaptation;Endocrine and metabolic diseases;Energy metabolism;Neurodegenerative diseases;Circulatory system	ko01100//Metabolic pathways;ko05010//Alzheimer disease;ko05016//Huntington disease;ko04714//Thermogenesis;ko04932//Non-alcoholic fatty liver disease (NAFLD);ko00190//Oxidative phosphorylation;ko05012//Parkinson disease;ko04260//Cardiac muscle contraction	K02266;K02266;K02266;K02266;K02266;K02266;K02266;K02266	GO:0005743//mitochondrial inner membrane;GO:0005751//mitochondrial respiratory chain complex IV	GO:0004129//cytochrome-c oxidase activity	-
MergePeak_9987	25	56856288	56857042	0.00442	0.108	69	36	48	34	30	20	1.670000	1.490000	3.190000	1.060000	0.810000	0.790000	2.120000	0.890000	-1.252187	3' UTR	56854764	56864650	9887	-	ENSBGRG00000015231	ENSBGRT00000028004	56854764	56864650	9887	-	ENSBGRG00000015231	ENSBGRT00000028004	7985	--	XP_027384889.1 uncharacterized protein LOC113884473 isoform X4 [Bos indicus x Bos taurus]	-	-	-	-	-	-	-
MergePeak_14471	7	8105016	8105778	0.00443	0.108	151	80	99	79	63	65	3.610000	3.290000	6.500000	2.440000	1.680000	2.560000	4.470000	2.230000	-1.003231	Promoter (<=1kb)	8017421	8104992	87572	-	ENSBGRG00000016782	ENSBGRT00000030952	8017421	8104992	87572	-	ENSBGRG00000016782	ENSBGRT00000030952	-405	KCTD9	potassium channel tetramerization domain containing 9 [Source:HGNC Symbol;Acc:HGNC:22401]	-	-	-	-	-	GO:0005515//protein binding;GO:0042802//identical protein binding;GO:0043621//protein self-association;GO:0097602//cullin family protein binding	GO:0035556//intracellular signal transduction;GO:0051260//protein homooligomerization
MergePeak_6309	19	38100105	38100613	0.00444	0.108	88	57	33	35	26	33	3.160000	3.510000	3.250000	1.620000	1.040000	1.950000	3.310000	1.540000	-1.103901	Intron (ENSBGRT00000037818/ENSBGRG00000020553, intron 5 of 5)	38082061	38103778	21718	+	ENSBGRG00000020553	ENSBGRT00000037818	38082061	38103778	21718	+	ENSBGRG00000020553	ENSBGRT00000037818	18298	SCO1	SCO cytochrome c oxidase assembly protein 1 [Source:HGNC Symbol;Acc:HGNC:10603]	-	-	-	-	GO:0005739//mitochondrion;GO:0005743//mitochondrial inner membrane;GO:0030016//myofibril;GO:0031305//integral component of mitochondrial inner membrane;GO:0072492//host cell mitochondrial intermembrane space	GO:0005507//copper ion binding	GO:0006825//copper ion transport;GO:0006878//cellular copper ion homeostasis;GO:0008535//respiratory chain complex IV assembly;GO:0033617//mitochondrial respiratory chain complex IV assembly;GO:1901799//negative regulation of proteasomal protein catabolic process
MergePeak_10366	26	45701739	45702352	0.00453	0.109	77	54	30	40	20	22	2.290000	2.760000	2.450000	1.540000	0.660000	1.080000	2.500000	1.090000	-1.197600	Promoter (<=1kb)	45695070	45701750	6681	-	ENSBGRG00000016254	ENSBGRT00000030135	45695070	45701750	6681	-	ENSBGRG00000016254	ENSBGRT00000030135	-295	TEDC2	tubulin epsilon and delta complex 2 [Source:HGNC Symbol;Acc:HGNC:25849]	-	-	-	-	GO:0005814//centriole;GO:0005929//cilium	-	GO:0045880//positive regulation of smoothened signaling pathway
MergePeak_14996	7	80229003	80229565	0.00457	0.11	76	55	44	40	31	29	2.470000	3.060000	3.920000	1.680000	1.120000	1.550000	3.150000	1.450000	-1.119299	Intron (ENSBGRT00000009434/ENSBGRG00000005123, intron 2 of 10)	79758005	80291001	532997	-	ENSBGRG00000005123	ENSBGRT00000009434	79758005	80291001	532997	-	ENSBGRG00000005123	ENSBGRT00000009434	61717	GLIS3	GLIS family zinc finger 3 [Source:HGNC Symbol;Acc:HGNC:28510]	-	-	-	-	GO:0005634//nucleus	GO:0003676//nucleic acid binding	GO:0006357//regulation of transcription by RNA polymerase II
MergePeak_13813	6	4398657	4399383	0.00467	0.111	135	75	83	66	46	61	3.390000	3.230000	5.720000	2.140000	1.290000	2.520000	4.110000	1.980000	-1.053638	Promoter (<=1kb)	4388851	4398849	9999	-	ENSBGRG00000017804	ENSBGRT00000032622	4388851	4398849	9999	-	ENSBGRG00000017804	ENSBGRT00000032743	-171	TACC3	NP_001093775.1 transforming acidic coiled-coil-containing protein 3 [Bos taurus]	Genetic Information Processing	Translation	ko03013//RNA transport	K14283	-	-	GO:0007052//mitotic spindle organization
MergePeak_10542	27	17879185	17880081	0.00473	0.111	9229	16408	12429	2229	2532	5890	187.830000	573.200000	694.090000	58.610000	57.480000	197.010000	485.040000	104.370000	-2.216397	Downstream (<1kb)	17879940	17880014	75	-	ENSBGRG00000025835	ENSBGRT00000047758	17879940	17880014	75	-	ENSBGRG00000025835	ENSBGRT00000047758	381	--	-	-	-	-	-	-	-	-
MergePeak_5756	18	62688424	62689102	0.00482	0.112	90	37	43	34	27	29	2.420000	1.710000	3.170000	1.180000	0.810000	1.280000	2.430000	1.090000	-1.156628	Promoter (<=1kb)	62679759	62687856	8098	-	ENSBGRG00000009030	ENSBGRT00000016726	62679759	62687856	8098	-	ENSBGRG00000009030	ENSBGRT00000016726	-907	PDP1	pyruvate dehyrogenase phosphatase catalytic subunit 1 [Source:HGNC Symbol;Acc:HGNC:9279]	-	-	-	-	-	GO:0003824//catalytic activity;GO:0004722//protein serine/threonine phosphatase activity;GO:0043169//cation binding	GO:0006470//protein dephosphorylation;GO:0035970//peptidyl-threonine dephosphorylation
MergePeak_15065	7	97018610	97019302	0.00494	0.113	96	51	46	45	46	22	2.530000	2.310000	3.330000	1.530000	1.350000	0.950000	2.720000	1.280000	-1.087463	Promoter (<=1kb)	97014711	97018892	4182	-	ENSBGRG00000001942	ENSBGRT00000003663	97014711	97018892	4182	-	ENSBGRG00000001942	ENSBGRT00000003663	-64	RPS6	NP_001015548.1 40S ribosomal protein S6 [Bos taurus]	Environmental Information Processing;Genetic Information Processing;Organismal Systems;Human Diseases;Environmental Information Processing;Organismal Systems;Environmental Information Processing;Environmental Information Processing;Human Diseases	Signal transduction;Translation;Environmental adaptation;Cancers;Signal transduction;Endocrine system;Signal transduction;Signal transduction;Drug resistance	ko04151//PI3K-Akt signaling pathway;ko03010//Ribosome;ko04714//Thermogenesis;ko05205//Proteoglycans in cancer;ko04150//mTOR signaling pathway;ko04910//Insulin signaling pathway;ko04371//Apelin signaling pathway;ko04066//HIF-1 signaling pathway;ko01521//EGFR tyrosine kinase inhibitor resistance	K02991;K02991;K02991;K02991;K02991;K02991;K02991;K02991;K02991	GO:0005840//ribosome	GO:0003735//structural constituent of ribosome	GO:0006412//translation
MergePeak_1155	10	49248561	49249071	0.00505	0.113	77	62	43	40	41	28	2.750000	3.810000	4.220000	1.850000	1.640000	1.650000	3.590000	1.710000	-1.069988	Exon (ENSBGRT00000012901/ENSBGRG00000006976, exon 1 of 4)	49195953	49249037	53085	-	ENSBGRG00000006976	ENSBGRT00000012901	49195953	49249037	53085	-	ENSBGRG00000006976	ENSBGRT00000012901	221	SNX3	XP_014446547.1 sorting nexin-3 [Tupaia chinensis]	Cellular Processes	Transport and catabolism	ko04144//Endocytosis	K17918	-	GO:0035091//phosphatidylinositol binding;GO:1901981//phosphatidylinositol phosphate binding	-
MergePeak_7241	2	104207912	104208440	0.00511	0.114	82	44	37	33	29	28	2.830000	2.610000	3.510000	1.470000	1.120000	1.590000	2.980000	1.390000	-1.100227	Intron (ENSBGRT00000013794/ENSBGRG00000007349, intron 7 of 10)	103681927	104321811	639885	+	ENSBGRG00000007349	ENSBGRT00000013794	103681927	104321811	639885	+	ENSBGRG00000007349	ENSBGRT00000013794	526249	GALNT13	polypeptide N-acetylgalactosaminyltransferase 13 [Source:HGNC Symbol;Acc:HGNC:23242]	Metabolism;Metabolism;Metabolism	Global and overview maps;Glycan biosynthesis and metabolism;Glycan biosynthesis and metabolism	ko01100//Metabolic pathways;ko00514//Other types of O-glycan biosynthesis;ko00512//Mucin type O-glycan biosynthesis	K00710;K00710;K00710	-	GO:0004653//polypeptide N-acetylgalactosaminyltransferase activity	GO:0006493//protein O-linked glycosylation;GO:0018242//protein O-linked glycosylation via serine;GO:0018243//protein O-linked glycosylation via threonine
MergePeak_6629	2	3345338	3345816	0.00515	0.114	84	49	49	37	20	37	3.200000	3.210000	5.130000	1.820000	0.850000	2.320000	3.850000	1.660000	-1.213675	Intron (ENSBGRT00000008435/ENSBGRG00000004529, intron 2 of 8)	3284228	3446316	162089	-	ENSBGRG00000004529	ENSBGRT00000008435	3284228	3446316	162089	-	ENSBGRG00000004529	ENSBGRT00000008435	100739	CAPZB	capping actin protein of muscle Z-line subunit beta [Source:HGNC Symbol;Acc:HGNC:1491]	Cellular Processes	Transport and catabolism	ko04144//Endocytosis	K10365	GO:0005737//cytoplasm;GO:0005903//brush border;GO:0008290//F-actin capping protein complex;GO:0014069//postsynaptic density;GO:0016020//membrane;GO:0030027//lamellipodium;GO:0030863//cortical cytoskeleton;GO:0032279//asymmetric synapse;GO:0097224//sperm connecting piece;GO:0098685//Schaffer collateral - CA1 synapse;GO:0098686//hippocampal mossy fiber to CA3 synapse	GO:0003779//actin binding	GO:0008154//actin polymerization or depolymerization;GO:0030030//cell projection organization;GO:0030032//lamellipodium assembly;GO:0030036//actin cytoskeleton organization;GO:0051016//barbed-end actin filament capping
MergePeak_8581	22	13518598	13519160	0.00518	0.114	96	59	29	39	32	29	3.110000	3.290000	2.580000	1.630000	1.160000	1.550000	2.990000	1.450000	-1.044093	Promoter (<=1kb)	13516613	13518238	1626	-	ENSBGRG00000026033	ENSBGRT00000048145	13516613	13518238	1626	-	ENSBGRG00000026033	ENSBGRT00000048145	-641	RPL29	ribosomal protein L29 [Source:HGNC Symbol;Acc:HGNC:10331]	Genetic Information Processing	Translation	ko03010//Ribosome	K02905	GO:0005840//ribosome	GO:0003735//structural constituent of ribosome	GO:0006412//translation
MergePeak_1329	10	80860312	80861019	0.00521	0.114	114	46	48	34	58	27	2.940000	2.040000	3.400000	1.130000	1.670000	1.140000	2.790000	1.310000	-1.090698	Intron (ENSBGRT00000015729/ENSBGRG00000007902, intron 1 of 31)	80729687	80867002	137316	-	ENSBGRG00000007902	ENSBGRT00000015729	80729687	80867002	137316	-	ENSBGRG00000007902	ENSBGRT00000015729	6337	CD109	CD109 molecule [Source:HGNC Symbol;Acc:HGNC:21685]	-	-	-	-	GO:0005576//extracellular region;GO:0005615//extracellular space;GO:0005829//cytosol;GO:0005886//plasma membrane	GO:0004866//endopeptidase inhibitor activity;GO:0050431//transforming growth factor beta binding	GO:0001933//negative regulation of protein phosphorylation;GO:0001942//hair follicle development;GO:0010839//negative regulation of keratinocyte proliferation;GO:0030512//negative regulation of transforming growth factor beta receptor signaling pathway;GO:0045616//regulation of keratinocyte differentiation;GO:0061045//negative regulation of wound healing;GO:0072675//osteoclast fusion
MergePeak_767	1	150991737	150992188	0.00525	0.114	46	29	60	19	24	26	1.860000	2.010000	6.660000	0.990000	1.080000	1.730000	3.510000	1.270000	-1.466643	Promoter (<=1kb)	150988836	150991864	3029	-	ENSBGRG00000008026	ENSBGRT00000014683	150988836	150991864	3029	-	ENSBGRG00000008026	ENSBGRT00000014683	-98	NUDT16	nudix hydrolase 16 [Source:HGNC Symbol;Acc:HGNC:26442]	Metabolism;Metabolism;Genetic Information Processing	Global and overview maps;Nucleotide metabolism;Folding, sorting and degradation	ko01100//Metabolic pathways;ko00230//Purine metabolism;ko03018//RNA degradation	K16855;K16855;K16855	GO:0005634//nucleus;GO:0005654//nucleoplasm;GO:0005730//nucleolus;GO:0005737//cytoplasm	GO:0000287//magnesium ion binding;GO:0003729//mRNA binding;GO:0005525//GTP binding;GO:0008235//metalloexopeptidase activity;GO:0016787//hydrolase activity;GO:0030145//manganese ion binding;GO:0030515//snoRNA binding;GO:0031404//chloride ion binding;GO:0042802//identical protein binding;GO:0042803//protein homodimerization activity;GO:0050072//m7G(5')pppN diphosphatase activity;GO:0050897//cobalt …	GO:0006382//adenosine to inosine editing;GO:0006402//mRNA catabolic process;GO:0008284//positive regulation of cell proliferation;GO:0016077//snoRNA catabolic process;GO:0046709//IDP catabolic process;GO:0090068//positive regulation of cell cycle process;GO:0090502//RNA phosphodiester bond hydrolysis, endonucleolytic;GO:1901639//XDP catabolic process;GO:2000781//positive regulation of double-stra…
MergePeak_2998	13	33808107	33808557	0.00526	0.114	105	35	58	45	21	32	4.250000	2.430000	6.450000	2.360000	0.950000	2.130000	4.380000	1.810000	-1.274941	Promoter (1-2kb)	33742167	33807140	64974	-	ENSBGRG00000005527	ENSBGRT00000010199	33742167	33807140	64974	-	ENSBGRG00000005527	ENSBGRT00000010199	-1192	ARHGEF17	Rho guanine nucleotide exchange factor 17 [Source:HGNC Symbol;Acc:HGNC:21726]	-	-	-	-	-	GO:0005085//guanyl-nucleotide exchange factor activity;GO:0005089//Rho guanyl-nucleotide exchange factor activity;GO:0005515//protein binding	GO:0030036//actin cytoskeleton organization
MergePeak_15408	8	19300512	19301184	0.00526	0.114	146	86	92	53	62	80	3.960000	4.010000	6.850000	1.860000	1.880000	3.570000	4.940000	2.440000	-1.017630	Promoter (<=1kb)	19298855	19300561	1707	-	ENSBGRG00000001217	ENSBGRT00000002230	19298855	19300561	1707	-	ENSBGRG00000001217	ENSBGRT00000002230	-287	VMAC	vimentin type intermediate filament associated coiled-coil protein [Source:HGNC Symbol;Acc:HGNC:33803]	-	-	-	-	-	-	-
MergePeak_5244	17	75124541	75124933	0.00527	0.114	73	51	48	52	18	18	3.400000	4.070000	6.130000	3.130000	0.930000	1.380000	4.530000	1.810000	-1.323521	Intron (ENSBGRT00000009598/ENSBGRG00000005179, intron 2 of 2)	75076246	75161680	85435	+	ENSBGRG00000005179	ENSBGRT00000009598	75076246	75161680	85435	+	ENSBGRG00000005179	ENSBGRT00000009598	48491	Inf2	XP_024837964.1 inverted formin-2 isoform X1 [Bos taurus]	-	-	-	-	-	GO:0003779//actin binding;GO:0017048//Rho GTPase binding	GO:0016043//cellular component organization;GO:0030036//actin cytoskeleton organization
MergePeak_7371	2	131388025	131388667	0.00533	0.114	94	57	47	44	40	34	2.670000	2.780000	3.660000	1.610000	1.270000	1.590000	3.040000	1.490000	-1.028759	Intron (ENSBGRT00000002160/ENSBGRG00000001148, intron 1 of 7)	131088750	131462696	373947	-	ENSBGRG00000001148	ENSBGRT00000002160	131088750	131462696	373947	-	ENSBGRG00000001148	ENSBGRT00000002160	74350	ZNF385B	zinc finger protein 385B [Source:HGNC Symbol;Acc:HGNC:26332]	-	-	-	-	-	GO:0003676//nucleic acid binding;GO:0008270//zinc ion binding	-
MergePeak_16688	9	87287585	87288425	0.00547	0.115	110	57	89	61	61	36	2.390000	2.120000	5.300000	1.710000	1.480000	1.280000	3.270000	1.490000	-1.133978	Intron (ENSBGRT00000023495/ENSBGRG00000012848, intron 1 of 1)	87283402	87309639	26238	+	ENSBGRG00000012848	ENSBGRT00000023495	87283402	87309639	26238	+	ENSBGRG00000012848	ENSBGRT00000023495	4603	-	-	-	-	-	-	-	-	-
MergePeak_2576	12	55866392	55866982	0.00558	0.115	98	47	70	42	39	42	3.030000	2.490000	5.940000	1.680000	1.340000	2.130000	3.820000	1.720000	-1.151164	Intron (ENSBGRT00000033818/ENSBGRG00000017942, intron 4 of 13)	55832925	55903606	70682	+	ENSBGRG00000017942	ENSBGRT00000033818	55832925	55903606	70682	+	ENSBGRG00000017942	ENSBGRT00000033818	33762	ASXL1	ASXL transcriptional regulator 1 [Source:HGNC Symbol;Acc:HGNC:18318]	-	-	-	-	GO:0005634//nucleus;GO:0035517//PR-DUB complex	GO:0003677//DNA binding;GO:0003713//transcription coactivator activity;GO:0042974//retinoic acid receptor binding;GO:0042975//peroxisome proliferator activated receptor binding	GO:0000902//cell morphogenesis;GO:0003007//heart morphogenesis;GO:0006351//transcription, DNA-templated;GO:0006355//regulation of transcription, DNA-templated;GO:0009887//animal organ morphogenesis;GO:0030097//hemopoiesis;GO:0032526//response to retinoic acid;GO:0035359//negative regulation of peroxisome proliferator activated receptor signaling pathway;GO:0035522//monoubiquitinated histone H2A d…
MergePeak_16595	9	70344490	70345234	0.0056	0.115	140	76	91	88	60	46	3.430000	3.200000	6.120000	2.790000	1.640000	1.850000	4.250000	2.090000	-1.023960	Promoter (<=1kb)	70277810	70344397	66588	-	ENSBGRG00000018455	ENSBGRT00000033798	70277810	70344397	66588	-	ENSBGRG00000018455	ENSBGRT00000033953	-465	RMND5A	required for meiotic nuclear division 5 homolog A [Source:HGNC Symbol;Acc:HGNC:25850]	-	-	-	-	GO:0000151//ubiquitin ligase complex;GO:0005634//nucleus;GO:0005654//nucleoplasm;GO:0005737//cytoplasm	GO:0005515//protein binding	-
MergePeak_7939	20	60012833	60013393	0.00564	0.115	61	33	52	25	25	28	1.990000	1.840000	4.650000	1.050000	0.910000	1.500000	2.830000	1.150000	-1.299168	Intron (ENSBGRT00000039025/ENSBGRG00000021082, intron 1 of 7)	59981673	60025131	43459	-	ENSBGRG00000021082	ENSBGRT00000039025	59981673	60025131	43459	-	ENSBGRG00000021082	ENSBGRT00000039025	12018	SULT2B1	sulfotransferase family 2B member 1 [Source:HGNC Symbol;Acc:HGNC:11459]	Metabolism	Lipid metabolism	ko00140//Steroid hormone biosynthesis	K01015	GO:0005829//cytosol;GO:0043231//intracellular membrane-bounded organelle	GO:0003676//nucleic acid binding;GO:0008146//sulfotransferase activity;GO:0015485//cholesterol binding;GO:0050294//steroid sulfotransferase activity;GO:1990239//steroid hormone binding	GO:0000103//sulfate assimilation;GO:0008202//steroid metabolic process;GO:0008203//cholesterol metabolic process;GO:0008285//negative regulation of cell proliferation;GO:0045606//positive regulation of epidermal cell differentiation;GO:0050427//3'-phosphoadenosine 5'-phosphosulfate metabolic process
MergePeak_15246	8	6338236	6338814	0.00565	0.115	112	54	109	66	42	50	3.530000	2.920000	9.440000	2.690000	1.480000	2.590000	5.300000	2.250000	-1.236067	Promoter (1-2kb)	6340080	6446091	106012	+	ENSBGRG00000001936	ENSBGRT00000003613	6340080	6446091	106012	+	ENSBGRG00000001936	ENSBGRT00000003613	-1555	GATAD2A	GATA zinc finger domain containing 2A [Source:HGNC Symbol;Acc:HGNC:29989]	-	-	-	-	GO:0005634//nucleus;GO:0005654//nucleoplasm;GO:0016581//NuRD complex	GO:0008270//zinc ion binding;GO:0030674//protein binding, bridging;GO:0043565//sequence-specific DNA binding	GO:0000122//negative regulation of transcription by RNA polymerase II;GO:0006355//regulation of transcription, DNA-templated;GO:0045892//negative regulation of transcription, DNA-templated
MergePeak_14416	7	4260692	4261184	0.00571	0.115	79	34	43	35	18	26	2.930000	2.160000	4.370000	1.680000	0.740000	1.580000	3.150000	1.330000	-1.243926	Promoter (<=1kb)	4257625	4260625	3001	-	ENSBGRG00000008644	ENSBGRT00000015789	4257625	4260625	3001	-	ENSBGRG00000008644	ENSBGRT00000015789	-313	NUDT18	nudix hydrolase 18 [Source:HGNC Symbol;Acc:HGNC:26194]	-	-	-	-	-	GO:0000287//magnesium ion binding;GO:0016787//hydrolase activity;GO:0017110//nucleoside-diphosphatase activity;GO:0044715//8-oxo-dGDP phosphatase activity;GO:0044716//8-oxo-GDP phosphatase activity;GO:0044717//8-hydroxy-dADP phosphatase activity	GO:0046057//dADP catabolic process;GO:0046067//dGDP catabolic process;GO:0046712//GDP catabolic process
MergePeak_12824	4	108133557	108133977	0.00573	0.115	82	50	40	39	24	31	3.560000	3.730000	4.770000	2.190000	1.160000	2.210000	4.020000	1.850000	-1.119670	Promoter (<=1kb)	108132414	108133016	603	-	ENSBGRG00000003203	ENSBGRT00000005937	108132414	108133016	603	-	ENSBGRG00000003203	ENSBGRT00000005937	-751	ARL4A	ADP ribosylation factor like GTPase 4A [Source:HGNC Symbol;Acc:HGNC:695]	-	-	-	-	GO:0005634//nucleus;GO:0005654//nucleoplasm;GO:0005730//nucleolus;GO:0005829//cytosol;GO:0005886//plasma membrane	GO:0005525//GTP binding	GO:0050873//brown fat cell differentiation
MergePeak_8824	22	54749299	54749991	0.00575	0.115	118	40	40	41	42	25	3.110000	1.810000	2.890000	1.400000	1.230000	1.080000	2.600000	1.240000	-1.068172	Exon (ENSBGRT00000020230/ENSBGRG00000011105, exon 1 of 6)	54713326	54749676	36351	-	ENSBGRG00000011105	ENSBGRT00000020230	54713326	54749676	36351	-	ENSBGRG00000011105	ENSBGRT00000020230	31	EXOG	NP_001193142.1 nuclease EXOG, mitochondrial [Bos taurus]	-	-	-	-	-	GO:0003676//nucleic acid binding;GO:0016787//hydrolase activity;GO:0046872//metal ion binding	-
MergePeak_1497	11	2378863	2379277	0.00575	0.115	79	45	63	42	20	36	3.480000	3.400000	7.610000	2.390000	0.980000	2.610000	4.830000	1.990000	-1.279255	Promoter (<=1kb)	2379617	2386200	6584	+	ENSBGRG00000014920	ENSBGRT00000027764	2379617	2386200	6584	+	ENSBGRG00000014920	ENSBGRT00000027764	-547	DCAF11	DDB1 and CUL4 associated factor 11 [Source:HGNC Symbol;Acc:HGNC:20258]	-	-	-	-	GO:0005654//nucleoplasm;GO:0080008//Cul4-RING E3 ubiquitin ligase complex	GO:0005515//protein binding	-
MergePeak_14144	6	88859967	88860411	0.00583	0.116	71	38	40	27	24	29	2.920000	2.680000	4.510000	1.430000	1.100000	1.960000	3.370000	1.500000	-1.167786	Intron (ENSBGRT00000037551/ENSBGRG00000020407, intron 6 of 6)	88852235	88860770	8536	+	ENSBGRG00000020407	ENSBGRT00000037551	88852235	88860770	8536	+	ENSBGRG00000020407	ENSBGRT00000037551	7954	SPP1	secreted phosphoprotein 1 [Source:HGNC Symbol;Acc:HGNC:11255]	Environmental Information Processing;Human Diseases;Cellular Processes;Environmental Information Processing;Organismal Systems;Environmental Information Processing;Organismal Systems	Signal transduction;Infectious diseases;Cellular community - eukaryotes;Signal transduction;Immune system;Signaling molecules and interaction;Endocrine system	ko04151//PI3K-Akt signaling pathway;ko05165//Human papillomavirus infection;ko04510//Focal adhesion;ko04371//Apelin signaling pathway;ko04620//Toll-like receptor signaling pathway;ko04512//ECM-receptor interaction;ko04929//GnRH secretion	K06250;K06250;K06250;K06250;K06250;K06250;K06250	GO:0005615//extracellular space;GO:0005794//Golgi apparatus	GO:0005178//integrin binding	GO:0001503//ossification;GO:0006710//androgen catabolic process;GO:0007155//cell adhesion;GO:0033280//response to vitamin D;GO:0045893//positive regulation of transcription, DNA-templated;GO:0071394//cellular response to testosterone stimulus;GO:2000866//positive regulation of estradiol secretion
MergePeak_16710	9	91516376	91517155	0.00589	0.117	103	47	32	21	36	36	2.410000	1.890000	2.060000	0.640000	0.940000	1.380000	2.120000	0.990000	-1.098564	Intron (ENSBGRT00000008144/ENSBGRG00000004323, intron 17 of 17)	91237450	91526316	288867	+	ENSBGRG00000004323	ENSBGRT00000008144	91237450	91526316	288867	+	ENSBGRG00000004323	ENSBGRT00000008144	279315	ANTXR1	ANTXR cell adhesion molecule 1 [Source:HGNC Symbol;Acc:HGNC:21014]	Organismal Systems	Immune system	ko04621//NOD-like receptor signaling pathway	K20909	GO:0009897//external side of plasma membrane;GO:0009986//cell surface;GO:0016021//integral component of membrane;GO:0031258//lamellipodium membrane;GO:0031527//filopodium membrane	GO:0004888//transmembrane signaling receptor activity;GO:0005518//collagen binding;GO:0038023//signaling receptor activity;GO:0051015//actin filament binding	GO:0001568//blood vessel development;GO:0022414//reproductive process;GO:0031532//actin cytoskeleton reorganization;GO:0034446//substrate adhesion-dependent cell spreading;GO:1901202//negative regulation of extracellular matrix assembly;GO:1905050//positive regulation of metallopeptidase activity
MergePeak_1557	11	8388114	8388506	0.00593	0.117	82	58	45	49	26	29	3.810000	4.630000	5.740000	2.940000	1.350000	2.220000	4.730000	2.170000	-1.124145	Intron (ENSBGRT00000039614/ENSBGRG00000021463, intron 1 of 4)	8361171	8405245	44075	+	ENSBGRG00000021463	ENSBGRT00000039614	8361171	8405245	44075	+	ENSBGRG00000021463	ENSBGRT00000039614	27139	ANP32A	XP_008524302.1 PREDICTED: acidic leucine-rich nuclear phosphoprotein 32 family member A isoform X4 [Equus przewalskii]	-	-	-	-	GO:0005634//nucleus;GO:0016363//nuclear matrix	GO:0005515//protein binding	-
MergePeak_3241	13	63133025	63133339	0.00595	0.118	57	40	47	12	32	30	3.310000	3.990000	7.490000	0.900000	2.070000	2.860000	4.930000	1.940000	-1.345531	Promoter (<=1kb)	63121480	63133071	11592	-	ENSBGRG00000005503	ENSBGRT00000010223	63121626	63133071	11446	-	ENSBGRG00000005503	ENSBGRT00000010304	-111	REXO2	RNA exonuclease 2 [Source:HGNC Symbol;Acc:HGNC:17851]	Genetic Information Processing	Translation	ko03008//Ribosome biogenesis in eukaryotes	K13288	GO:0005634//nucleus;GO:0005730//nucleolus;GO:0005739//mitochondrion;GO:0005925//focal adhesion	GO:0000175//3'-5'-exoribonuclease activity;GO:0003676//nucleic acid binding;GO:0008408//3'-5' exonuclease activity	GO:0006139//nucleobase-containing compound metabolic process
MergePeak_12289	4	8815848	8816261	0.00602	0.118	99	50	60	45	43	37	4.370000	3.790000	7.270000	2.570000	2.120000	2.680000	5.140000	2.460000	-1.063110	Promoter (<=1kb)	8810732	8815818	5087	-	ENSBGRG00000005577	ENSBGRT00000010565	8810732	8815818	5087	-	ENSBGRG00000005577	ENSBGRT00000010639	-236	CDK5	cyclin dependent kinase 5 [Source:HGNC Symbol;Acc:HGNC:1774]	Human Diseases;Organismal Systems;Human Diseases	Neurodegenerative diseases;Development;Substance dependence	ko05010//Alzheimer disease;ko04360//Axon guidance;ko05030//Cocaine addiction	K02090;K02090;K02090	GO:0005634//nucleus;GO:0005654//nucleoplasm;GO:0005737//cytoplasm;GO:0005829//cytosol;GO:0005886//plasma membrane;GO:0030027//lamellipodium;GO:0030175//filopodium;GO:0030424//axon	GO:0002039//p53 binding;GO:0004672//protein kinase activity;GO:0004674//protein serine/threonine kinase activity;GO:0005176//ErbB-2 class receptor binding;GO:0005524//ATP binding;GO:0030549//acetylcholine receptor activator activity;GO:0043125//ErbB-3 class receptor binding;GO:0051879//Hsp90 protein binding	GO:0001764//neuron migration;GO:0001963//synaptic transmission, dopaminergic;GO:0006468//protein phosphorylation;GO:0006886//intracellular protein transport;GO:0006915//apoptotic process;GO:0007160//cell-matrix adhesion;GO:0007409//axonogenesis;GO:0007416//synapse assembly;GO:0007519//skeletal muscle tissue development;GO:0008045//motor neuron axon guidance;GO:0008306//associative learning;GO:000…
MergePeak_5707	18	55177221	55177761	0.00605	0.118	77	42	48	41	29	25	2.600000	2.430000	4.450000	1.790000	1.090000	1.390000	3.160000	1.420000	-1.154034	Promoter (<=1kb)	55178282	55194272	15991	+	ENSBGRG00000009759	ENSBGRT00000018008	55178282	55194272	15991	+	ENSBGRG00000009759	ENSBGRT00000018008	-791	PABPC3	poly(A) binding protein cytoplasmic 1 [Source:HGNC Symbol;Acc:HGNC:8554]	Genetic Information Processing;Genetic Information Processing;Genetic Information Processing	Translation;Translation;Folding, sorting and degradation	ko03013//RNA transport;ko03015//mRNA surveillance pathway;ko03018//RNA degradation	K13126;K13126;K13126	GO:0005829//cytosol	GO:0003676//nucleic acid binding;GO:0003723//RNA binding;GO:0008143//poly(A) binding	-
MergePeak_17125	Y	6900028	6901158	0.00609	0.118	232	175	178	149	82	96	3.740000	4.850000	7.880000	3.110000	1.480000	2.550000	5.490000	2.380000	-1.205845	Promoter (<=1kb)	6900979	6975181	74203	+	ENSBGRG00000018435	ENSBGRT00000033769	6900979	6975181	74203	+	ENSBGRG00000018435	ENSBGRT00000033769	-386	PRKX	DAA12566.1 TPA: protein kinase, X-linked-like [Bos taurus]	-	-	-	-	-	GO:0004672//protein kinase activity;GO:0004674//protein serine/threonine kinase activity;GO:0005524//ATP binding	GO:0006468//protein phosphorylation
MergePeak_7787	20	51307134	51307600	0.00613	0.119	88	70	46	46	26	41	3.440000	4.700000	4.940000	2.330000	1.130000	2.640000	4.360000	2.030000	-1.102848	Promoter (<=1kb)	51292317	51306620	14304	-	ENSBGRG00000022243	ENSBGRT00000041122	51292317	51306620	14304	-	ENSBGRG00000022243	ENSBGRT00000041122	-747	U2AF2	U2 small nuclear RNA auxiliary factor 2 [Source:HGNC Symbol;Acc:HGNC:23156]	Genetic Information Processing	Transcription	ko03040//Spliceosome	K12837	GO:0000974//Prp19 complex;GO:0005634//nucleus;GO:0005681//spliceosomal complex;GO:0016607//nuclear speck;GO:0071004//U2-type prespliceosome;GO:0089701//U2AF	GO:0003676//nucleic acid binding;GO:0003723//RNA binding;GO:0019899//enzyme binding;GO:0030628//pre-mRNA 3'-splice site binding;GO:0070742//C2H2 zinc finger domain binding	GO:0000398//mRNA splicing, via spliceosome;GO:0006397//mRNA processing;GO:0008380//RNA splicing;GO:0031397//negative regulation of protein ubiquitination;GO:0033120//positive regulation of RNA splicing;GO:0048025//negative regulation of mRNA splicing, via spliceosome
MergePeak_5196	17	69627241	69627756	0.00617	0.119	75	59	71	58	22	32	2.660000	3.590000	6.900000	2.650000	0.870000	1.860000	4.380000	1.790000	-1.290971	5' UTR	69534930	69628135	93206	-	ENSBGRG00000019016	ENSBGRT00000035131	69534930	69628135	93206	-	ENSBGRG00000019016	ENSBGRT00000035131	637	SETD3	SET domain containing 3, actin histidine methyltransferase [Source:HGNC Symbol;Acc:HGNC:20493]	-	-	-	-	GO:0000790//nuclear chromatin;GO:0005737//cytoplasm	GO:0001102//RNA polymerase II activating transcription factor binding;GO:0005515//protein binding;GO:0018064//protein-histidine N-methyltransferase activity;GO:0042800//histone methyltransferase activity (H3-K4 specific);GO:0046975//histone methyltransferase activity (H3-K36 specific)	GO:0018021//peptidyl-histidine methylation;GO:0030047//actin modification;GO:0045944//positive regulation of transcription by RNA polymerase II;GO:0051149//positive regulation of muscle cell differentiation;GO:0070472//regulation of uterine smooth muscle contraction
MergePeak_10580	27	24738362	24739095	0.00627	0.12	104	49	77	45	45	45	2.590000	2.090000	5.260000	1.450000	1.250000	1.840000	3.310000	1.510000	-1.132283	Promoter (<=1kb)	24738816	24776497	37682	+	ENSBGRG00000010519	ENSBGRT00000019264	24738816	24776497	37682	+	ENSBGRG00000010519	ENSBGRT00000019264	-88	DDX50	DExD-box helicase 50 [Source:HGNC Symbol;Acc:HGNC:17906]	-	-	-	-	GO:0005634//nucleus;GO:0005730//nucleolus;GO:0005886//plasma membrane	GO:0003676//nucleic acid binding;GO:0003723//RNA binding;GO:0004386//helicase activity;GO:0005524//ATP binding	-
MergePeak_4539	16	35625478	35626108	0.0063	0.12	70	54	44	37	42	23	2.030000	2.680000	3.490000	1.380000	1.360000	1.090000	2.730000	1.280000	-1.092757	Intron (ENSBGRT00000017642/ENSBGRG00000009618, intron 1 of 17)	35502823	35704722	201900	-	ENSBGRG00000009618	ENSBGRT00000017642	35502823	35704722	201900	-	ENSBGRG00000009618	ENSBGRT00000017642	78929	FAT4	FAT atypical cadherin 4 [Source:HGNC Symbol;Acc:HGNC:23109]	Environmental Information Processing;Environmental Information Processing	Signal transduction;Signal transduction	ko04391//Hippo signaling pathway -fly;ko04392//Hippo signaling pathway - multiple species	K16669;K16669	GO:0005886//plasma membrane;GO:0016020//membrane;GO:0045177//apical part of cell	GO:0005509//calcium ion binding	GO:0001658//branching involved in ureteric bud morphogenesis;GO:0001822//kidney development;GO:0003007//heart morphogenesis;GO:0007009//plasma membrane organization;GO:0007155//cell adhesion;GO:0007156//homophilic cell adhesion via plasma membrane adhesion molecules;GO:0007157//heterophilic cell-cell adhesion via plasma membrane cell adhesion molecules;GO:0007219//Notch signaling pathway;GO:00085…
MergePeak_13714	5	120940492	120941122	0.0063	0.12	106	47	70	51	50	33	3.070000	2.340000	5.560000	1.910000	1.610000	1.570000	3.660000	1.700000	-1.106309	Intron (ENSBGRT00000014851/ENSBGRG00000007814, intron 2 of 19)	120939319	121013561	74243	+	ENSBGRG00000007814	ENSBGRT00000014851	120939319	121013561	74243	+	ENSBGRG00000007814	ENSBGRT00000014851	1488	ACO2	aconitase 2 [Source:HGNC Symbol;Acc:HGNC:118]	Metabolism;Metabolism;Metabolism;Metabolism;Metabolism;Metabolism	Global and overview maps;Global and overview maps;Global and overview maps;Carbohydrate metabolism;Carbohydrate metabolism;Global and overview maps	ko01100//Metabolic pathways;ko01200//Carbon metabolism;ko01230//Biosynthesis of amino acids;ko00630//Glyoxylate and dicarboxylate metabolism;ko00020//Citrate cycle (TCA cycle);ko01210//2-Oxocarboxylic acid metabolism	K01681;K01681;K01681;K01681;K01681;K01681	GO:0005739//mitochondrion	GO:0003994//aconitate hydratase activity;GO:0005506//iron ion binding;GO:0051539//4 iron, 4 sulfur cluster binding	GO:0006099//tricarboxylic acid cycle;GO:0006101//citrate metabolic process
MergePeak_2471	12	40599885	40600492	0.00636	0.121	73	51	52	34	17	39	2.190000	2.630000	4.290000	1.320000	0.570000	1.930000	3.040000	1.270000	-1.259243	5' UTR	40537160	40600440	63281	-	ENSBGRG00000007227	ENSBGRT00000013411	40537160	40600440	63281	-	ENSBGRG00000007227	ENSBGRT00000013411	252	FERMT1	fermitin family member 1 [Source:HGNC Symbol;Acc:HGNC:15889]	-	-	-	-	GO:0005829//cytosol;GO:0005925//focal adhesion;GO:0030054//cell junction	GO:0051015//actin filament binding	GO:0001954//positive regulation of cell-matrix adhesion;GO:0007155//cell adhesion;GO:0007229//integrin-mediated signaling pathway;GO:0010629//negative regulation of gene expression;GO:0030511//positive regulation of transforming growth factor beta receptor signaling pathway;GO:0033630//positive regulation of cell adhesion mediated by integrin;GO:0042308//negative regulation of protein import into…
MergePeak_15367	8	16262643	16263330	0.00636	0.121	125	93	84	68	30	69	3.320000	4.240000	6.120000	2.330000	0.890000	3.010000	4.560000	2.080000	-1.132450	Exon (ENSBGRT00000022859/ENSBGRG00000012516, exon 1 of 2)	16262814	16264102	1289	+	ENSBGRG00000012516	ENSBGRT00000022859	16262814	16264102	1289	+	ENSBGRG00000012516	ENSBGRT00000022859	172	SWSAP1	SWIM-type zinc finger 7 associated protein 1 [Source:HGNC Symbol;Acc:HGNC:26638]	-	-	-	-	GO:0097196//Shu complex	GO:0003697//single-stranded DNA binding;GO:0016887//ATPase activity	GO:0000724//double-strand break repair via homologous recombination;GO:0050821//protein stabilization
MergePeak_9534	24	44497453	44498247	0.00648	0.121	127	62	75	73	59	31	2.920000	2.440000	4.730000	2.170000	1.510000	1.170000	3.360000	1.620000	-1.052467	Intron (ENSBGRT00000018441/ENSBGRG00000010074, intron 5 of 8)	44469926	44535722	65797	-	ENSBGRG00000010074	ENSBGRT00000018441	44469926	44535722	65797	-	ENSBGRG00000010074	ENSBGRT00000018441	37872	GMPR	guanosine monophosphate reductase [Source:HGNC Symbol;Acc:HGNC:4376]	Metabolism;Metabolism	Global and overview maps;Nucleotide metabolism	ko01100//Metabolic pathways;ko00230//Purine metabolism	K00364;K00364	GO:1902560//GMP reductase complex	GO:0003824//catalytic activity;GO:0003920//GMP reductase activity;GO:0016491//oxidoreductase activity	GO:0009117//nucleotide metabolic process;GO:0055114//oxidation-reduction process
MergePeak_4085	15	18865021	18865659	0.00649	0.121	165	67	98	89	58	56	4.720000	3.290000	7.690000	3.290000	1.850000	2.630000	5.230000	2.590000	-1.013859	Intron (ENSBGRT00000015957/ENSBGRG00000008746, intron 1 of 1)	18864052	18868802	4751	+	ENSBGRG00000008746	ENSBGRT00000015957	18864052	18868802	4751	+	ENSBGRG00000008746	ENSBGRT00000015957	1288	ING1	inhibitor of growth family member 1 [Source:HGNC Symbol;Acc:HGNC:6062]	-	-	-	-	GO:0005634//nucleus	-	GO:0006606//protein import into nucleus;GO:0008285//negative regulation of cell proliferation;GO:0010941//regulation of cell death;GO:0045893//positive regulation of transcription, DNA-templated
MergePeak_13930	6	30315472	30316005	0.00657	0.121	85	56	48	39	39	36	2.910000	3.290000	4.510000	1.720000	1.490000	2.020000	3.570000	1.740000	-1.036837	Intron (ENSBGRT00000032682/ENSBGRG00000017795, intron 1 of 12)	30315073	30416793	101721	+	ENSBGRG00000017795	ENSBGRT00000032682	30315073	30416793	101721	+	ENSBGRG00000017795	ENSBGRT00000032682	665	G3BP2	G3BP stress granule assembly factor 2 [Source:HGNC Symbol;Acc:HGNC:30291]	-	-	-	-	GO:0005829//cytosol;GO:0010494//cytoplasmic stress granule	GO:0003676//nucleic acid binding;GO:0003723//RNA binding	GO:0034063//stress granule assembly;GO:0051260//protein homooligomerization;GO:0062029//positive regulation of stress granule assembly
MergePeak_14140	6	88146981	88147737	0.00659	0.121	91	59	74	54	47	38	2.190000	2.440000	4.900000	1.680000	1.260000	1.510000	3.180000	1.480000	-1.103430	Promoter (<=1kb)	88097926	88146920	48995	-	ENSBGRG00000019203	ENSBGRT00000035642	88097926	88146920	48995	-	ENSBGRG00000019203	ENSBGRT00000035642	-439	NCAPG	non-SMC condensin I complex subunit G [Source:HGNC Symbol;Acc:HGNC:24304]	-	-	-	-	GO:0000779//condensed chromosome, centromeric region;GO:0000793//condensed chromosome;GO:0000796//condensin complex;GO:0005737//cytoplasm	-	GO:0007076//mitotic chromosome condensation
MergePeak_15615	8	47500982	47501468	0.00668	0.121	88	67	47	53	37	32	3.300000	4.320000	4.840000	2.570000	1.550000	1.970000	4.150000	2.030000	-1.031632	Promoter (<=1kb)	47501250	47505943	4694	+	ENSBGRG00000016730	ENSBGRT00000030724	47501250	47505943	4694	+	ENSBGRG00000016730	ENSBGRT00000030724	-25	REEP6	receptor accessory protein 6 [Source:HGNC Symbol;Acc:HGNC:30078]	-	-	-	-	GO:0001917//photoreceptor inner segment;GO:0005783//endoplasmic reticulum;GO:0005789//endoplasmic reticulum membrane;GO:0044317//rod spherule;GO:0045177//apical part of cell	-	GO:0032386//regulation of intracellular transport;GO:0050908//detection of light stimulus involved in visual perception
MergePeak_14248	6	111829226	111829913	0.00672	0.122	79	56	29	24	44	25	2.100000	2.550000	2.110000	0.820000	1.300000	1.090000	2.250000	1.070000	-1.072314	Promoter (<=1kb)	111830175	111833063	2889	+	ENSBGRG00000001872	ENSBGRT00000003489	111830175	111833063	2889	+	ENSBGRG00000001872	ENSBGRT00000003489	-606	GAR1	GAR1 ribonucleoprotein [Source:HGNC Symbol;Acc:HGNC:14264]	Genetic Information Processing	Translation	ko03008//Ribosome biogenesis in eukaryotes	K11128	GO:0000784//nuclear chromosome, telomeric region;GO:0001650//fibrillar center;GO:0005654//nucleoplasm;GO:0005697//telomerase holoenzyme complex;GO:0031429//box H/ACA snoRNP complex;GO:0090661//box H/ACA telomerase RNP complex	GO:0003723//RNA binding;GO:0034513//box H/ACA snoRNA binding;GO:0070034//telomerase RNA binding	GO:0001522//pseudouridine synthesis;GO:0007004//telomere maintenance via telomerase;GO:0042254//ribosome biogenesis
MergePeak_3020	13	35192097	35192606	0.00678	0.122	86	46	40	40	31	28	3.080000	2.830000	3.930000	1.850000	1.240000	1.650000	3.280000	1.580000	-1.053771	5' UTR	35192336	35214845	22510	+	ENSBGRG00000009873	ENSBGRT00000018120	35192336	35214845	22510	+	ENSBGRG00000009873	ENSBGRT00000018120	15	Trpc2	DAA21979.1 TPA: short transient receptor potential channel 2 homolog [Bos taurus]	-	-	-	-	GO:0005634//nucleus	GO:0003684//damaged DNA binding	GO:0000012//single strand break repair
MergePeak_1492	11	1712671	1713205	0.0068	0.122	78	54	55	41	37	35	2.660000	3.170000	5.150000	1.810000	1.410000	1.960000	3.660000	1.730000	-1.081072	Exon (ENSBGRT00000012821/ENSBGRG00000006964, exon 2 of 2)	1712640	1713773	1134	-	ENSBGRG00000006964	ENSBGRT00000012821	1712640	1713773	1134	-	ENSBGRG00000006964	ENSBGRT00000012821	835	PPP1R3E	protein phosphatase 1 regulatory subunit 3E [Source:HGNC Symbol;Acc:HGNC:14943]	Organismal Systems;Human Diseases	Endocrine system;Endocrine and metabolic diseases	ko04910//Insulin signaling pathway;ko04931//Insulin resistance	K07189;K07189	-	GO:0005515//protein binding	-
MergePeak_1570	11	10204637	10205180	0.00682	0.122	100	55	32	46	23	29	3.360000	3.170000	2.950000	2.000000	0.860000	1.600000	3.160000	1.490000	-1.084612	Intron (ENSBGRT00000044073/ENSBGRG00000023783, intron 7 of 8)	10130739	10207679	76941	+	ENSBGRG00000023783	ENSBGRT00000044073	10130739	10207679	76941	+	ENSBGRG00000023783	ENSBGRT00000044073	74169	AAGAB	alpha and gamma adaptin binding protein [Source:HGNC Symbol;Acc:HGNC:25662]	-	-	-	-	GO:0005737//cytoplasm;GO:0005829//cytosol;GO:0016607//nuclear speck	-	-
MergePeak_9449	24	29391528	29391927	0.00689	0.122	94	53	29	34	30	32	4.300000	4.160000	3.640000	2.010000	1.530000	2.400000	4.030000	1.980000	-1.025279	Promoter (<=1kb)	29392073	29398583	6511	+	ENSBGRG00000019018	ENSBGRT00000034858	29392073	29398583	6511	+	ENSBGRG00000019018	ENSBGRT00000034858	-346	RXRB	retinoid X receptor beta [Source:HGNC Symbol;Acc:HGNC:10478]	Human Diseases;Human Diseases;Human Diseases;Organismal Systems;Organismal Systems;Organismal Systems;Human Diseases;Organismal Systems;Organismal Systems;Human Diseases;Human Diseases	Cancers;Cancers;Cancers;Immune system;Endocrine system;Endocrine system;Cancers;Endocrine system;Endocrine system;Cancers;Cancers	ko05200//Pathways in cancer;ko05202//Transcriptional misregulation in cancers;ko05226//Gastric cancer;ko04659//Th17 cell differentiation;ko04919//Thyroid hormone signaling pathway;ko04928//Parathyroid hormone synthesis, secretion and action;ko05222//Small cell lung cancer;ko03320//PPAR signaling pathway;ko04920//Adipocytokine signaling pathway;ko05223//Non-small cell lung cancer;ko05216//Thyroid …	K08525;K08525;K08525;K08525;K08525;K08525;K08525;K08525;K08525;K08525;K08525	GO:0005634//nucleus;GO:0005654//nucleoplasm	GO:0000977//RNA polymerase II regulatory region sequence-specific DNA binding;GO:0001228//DNA-binding transcription activator activity, RNA polymerase II-specific;GO:0003677//DNA binding;GO:0003700//DNA-binding transcription factor activity;GO:0003707//steroid hormone receptor activity;GO:0004879//nuclear receptor activity;GO:0008270//zinc ion binding;GO:0043565//sequence-specific DNA binding	GO:0006355//regulation of transcription, DNA-templated;GO:0045944//positive regulation of transcription by RNA polymerase II
MergePeak_11137	29	18884318	18884996	0.00694	0.122	120	66	57	63	37	43	3.230000	3.050000	4.210000	2.190000	1.110000	1.900000	3.500000	1.730000	-1.016583	Intron (ENSBGRT00000045773/ENSBGRG00000024615, intron 3 of 9)	18801491	18961025	159535	+	ENSBGRG00000024615	ENSBGRT00000045773	18801491	18961025	159535	+	ENSBGRG00000024615	ENSBGRT00000045773	83166	ETS1	ETS proto-oncogene 1, transcription factor [Source:HGNC Symbol;Acc:HGNC:3488]	Human Diseases;Environmental Information Processing;Human Diseases;Cellular Processes;Environmental Information Processing;Human Diseases;Organismal Systems	Cancers;Signal transduction;Infectious diseases;Cell growth and death;Signal transduction;Cancers;Development	ko05200//Pathways in cancer;ko04014//Ras signaling pathway;ko05166//HTLV-I infection;ko04218//Cellular senescence;ko04013//MAPK signaling pathway - fly;ko05211//Renal cell carcinoma;ko04320//Dorso-ventral axis formation	K02678;K02678;K02678;K02678;K02678;K02678;K02678	GO:0005634//nucleus;GO:0005654//nucleoplasm;GO:0005667//transcription factor complex	GO:0000978//RNA polymerase II proximal promoter sequence-specific DNA binding;GO:0000981//DNA-binding transcription factor activity, RNA polymerase II-specific;GO:0001228//DNA-binding transcription activator activity, RNA polymerase II-specific;GO:0003677//DNA binding;GO:0003700//DNA-binding transcription factor activity;GO:0042802//identical protein binding;GO:0043565//sequence-specific DNA bind…	GO:0006355//regulation of transcription, DNA-templated;GO:0006357//regulation of transcription by RNA polymerase II;GO:0010595//positive regulation of endothelial cell migration;GO:0010628//positive regulation of gene expression;GO:0030578//PML body organization;GO:0043536//positive regulation of blood vessel endothelial cell migration;GO:0045648//positive regulation of erythrocyte differentiatio…
MergePeak_9759	25	22312281	22312851	0.00697	0.122	99	45	75	29	39	51	3.170000	2.470000	6.580000	1.200000	1.390000	2.680000	4.070000	1.760000	-1.209453	Promoter (<=1kb)	22312646	22346183	33538	+	ENSBGRG00000022394	ENSBGRT00000041370	22312646	22346183	33538	+	ENSBGRG00000022394	ENSBGRT00000041370	-80	ENTPD7	ectonucleoside triphosphate diphosphohydrolase 7 [Source:HGNC Symbol;Acc:HGNC:19745]	-	-	-	-	-	GO:0016787//hydrolase activity	-
MergePeak_10608	27	27351625	27352243	0.00698	0.122	132	66	76	65	46	55	3.890000	3.340000	6.150000	2.480000	1.510000	2.670000	4.460000	2.220000	-1.006484	Intron (ENSBGRT00000042427/ENSBGRG00000022994, intron 2 of 5)	27345138	27396069	50932	+	ENSBGRG00000022994	ENSBGRT00000042427	27345138	27396069	50932	+	ENSBGRG00000022994	ENSBGRT00000042427	6796	SLC29A3	solute carrier family 29 member 3 [Source:HGNC Symbol;Acc:HGNC:23096]	Human Diseases	Substance dependence	ko05034//Alcoholism	K15014	GO:0005765//lysosomal membrane;GO:0005794//Golgi apparatus;GO:0016021//integral component of membrane;GO:0043231//intracellular membrane-bounded organelle	GO:0005337//nucleoside transmembrane transporter activity	GO:0015858//nucleoside transport;GO:1901642//nucleoside transmembrane transport
MergePeak_16349	9	29885031	29885640	0.00701	0.122	111	52	82	43	42	55	3.320000	2.670000	6.740000	1.660000	1.400000	2.710000	4.240000	1.920000	-1.142958	Intron (ENSBGRT00000024487/ENSBGRG00000013201, intron 1 of 13)	29884676	30030085	145410	+	ENSBGRG00000013201	ENSBGRT00000024487	29884676	30030085	145410	+	ENSBGRG00000013201	ENSBGRT00000024487	659	SFXN5	sideroflexin 5 [Source:HGNC Symbol;Acc:HGNC:16073]	-	-	-	-	GO:0005739//mitochondrion;GO:0016020//membrane	GO:0015075//ion transmembrane transporter activity	GO:0006811//ion transport;GO:0055085//transmembrane transport
MergePeak_5543	18	20988758	20989253	0.00702	0.122	119	39	76	43	37	47	4.380000	2.470000	7.680000	2.050000	1.520000	2.850000	4.840000	2.140000	-1.177396	Intron (ENSBGRT00000018532/ENSBGRG00000007959, intron 11 of 33)	20970458	20994962	24505	-	ENSBGRG00000007959	ENSBGRT00000018532	20970458	20994962	24505	-	ENSBGRG00000007959	ENSBGRT00000018532	5957	PLEC	plectin [Source:HGNC Symbol;Acc:HGNC:9069]	-	-	-	-	GO:0005829//cytosol;GO:0005856//cytoskeleton;GO:0005903//brush border;GO:0005925//focal adhesion;GO:0030056//hemidesmosome;GO:0042383//sarcolemma;GO:0043292//contractile fiber;GO:0045111//intermediate filament cytoskeleton	GO:0005515//protein binding;GO:0008092//cytoskeletal protein binding;GO:0030506//ankyrin binding	GO:0031581//hemidesmosome assembly
MergePeak_5036	17	35226130	35226571	0.00719	0.124	58	41	45	19	25	33	2.400000	2.910000	5.110000	1.020000	1.150000	2.240000	3.470000	1.470000	-1.239120	Intron (ENSBGRT00000043381/ENSBGRG00000023491, intron 1 of 8)	35225758	35278173	52416	+	ENSBGRG00000023491	ENSBGRT00000043381	35225758	35278173	52416	+	ENSBGRG00000023491	ENSBGRT00000043381	592	SNUPN	snurportin 1 [Source:HGNC Symbol;Acc:HGNC:14245]	Genetic Information Processing	Translation	ko03013//RNA transport	K13151	GO:0005634//nucleus;GO:0005737//cytoplasm	GO:0005515//protein binding;GO:0061608//nuclear import signal receptor activity	GO:0006606//protein import into nucleus;GO:0061015//snRNA import into nucleus
MergePeak_1962	11	60636468	60637235	0.00735	0.124	112	66	67	31	51	59	2.660000	2.690000	4.370000	0.950000	1.350000	2.310000	3.240000	1.540000	-1.073063	Intron (ENSBGRT00000012477/ENSBGRG00000006735, intron 15 of 25)	60502165	60673860	171696	+	ENSBGRG00000006735	ENSBGRT00000012477	60502165	60673860	171696	+	ENSBGRG00000006735	ENSBGRT00000012477	134686	DAAM1	dishevelled associated activator of morphogenesis 1 [Source:HGNC Symbol;Acc:HGNC:18142]	Environmental Information Processing	Signal transduction	ko04310//Wnt signaling pathway	K04512	GO:0001725//stress fiber;GO:0005829//cytosol;GO:0005886//plasma membrane;GO:0031514//motile cilium;GO:0036064//ciliary basal body	GO:0003779//actin binding;GO:0017048//Rho GTPase binding;GO:0042802//identical protein binding	GO:0016043//cellular component organization;GO:0030036//actin cytoskeleton organization
MergePeak_7673	20	34430889	34431423	0.00756	0.124	124	58	63	57	31	49	4.230000	3.400000	5.900000	2.510000	1.180000	2.750000	4.510000	2.150000	-1.068791	Exon (ENSBGRT00000049811/ENSBGRG00000026863, exon 1 of 2)	34428315	34432087	3773	-	ENSBGRG00000026863	ENSBGRT00000049811	34428315	34432087	3773	-	ENSBGRG00000026863	ENSBGRT00000049811	931	-	-	-	-	-	-	-	-	-
MergePeak_11139	29	18953438	18953985	0.00759	0.124	106	36	49	49	33	23	3.530000	2.060000	4.480000	2.110000	1.230000	1.260000	3.360000	1.530000	-1.134930	Intron (ENSBGRT00000045773/ENSBGRG00000024615, intron 8 of 9)	18801491	18961025	159535	+	ENSBGRG00000024615	ENSBGRT00000045773	18801491	18961025	159535	+	ENSBGRG00000024615	ENSBGRT00000045773	152220	ETS1	ETS proto-oncogene 1, transcription factor [Source:HGNC Symbol;Acc:HGNC:3488]	Human Diseases;Environmental Information Processing;Human Diseases;Cellular Processes;Environmental Information Processing;Human Diseases;Organismal Systems	Cancers;Signal transduction;Infectious diseases;Cell growth and death;Signal transduction;Cancers;Development	ko05200//Pathways in cancer;ko04014//Ras signaling pathway;ko05166//HTLV-I infection;ko04218//Cellular senescence;ko04013//MAPK signaling pathway - fly;ko05211//Renal cell carcinoma;ko04320//Dorso-ventral axis formation	K02678;K02678;K02678;K02678;K02678;K02678;K02678	GO:0005634//nucleus;GO:0005654//nucleoplasm;GO:0005667//transcription factor complex	GO:0000978//RNA polymerase II proximal promoter sequence-specific DNA binding;GO:0000981//DNA-binding transcription factor activity, RNA polymerase II-specific;GO:0001228//DNA-binding transcription activator activity, RNA polymerase II-specific;GO:0003677//DNA binding;GO:0003700//DNA-binding transcription factor activity;GO:0042802//identical protein binding;GO:0043565//sequence-specific DNA bind…	GO:0006355//regulation of transcription, DNA-templated;GO:0006357//regulation of transcription by RNA polymerase II;GO:0010595//positive regulation of endothelial cell migration;GO:0010628//positive regulation of gene expression;GO:0030578//PML body organization;GO:0043536//positive regulation of blood vessel endothelial cell migration;GO:0045648//positive regulation of erythrocyte differentiatio…
MergePeak_8828	22	55042777	55043180	0.0076	0.124	68	32	46	17	37	26	3.080000	2.490000	5.710000	0.990000	1.870000	1.930000	3.760000	1.600000	-1.232661	Promoter (<=1kb)	55043155	55120360	77206	+	ENSBGRG00000012620	ENSBGRT00000023080	55043155	55061414	18260	+	ENSBGRG00000012620	ENSBGRT00000023698	-177	ACAA1	acetyl-CoA acyltransferase 1 [Source:HGNC Symbol;Acc:HGNC:82]	Metabolism;Cellular Processes;Organismal Systems;Metabolism;Metabolism;Metabolism;Metabolism;Metabolism	Global and overview maps;Transport and catabolism;Endocrine system;Global and overview maps;Amino acid metabolism;Lipid metabolism;Lipid metabolism;Lipid metabolism	ko01100//Metabolic pathways;ko04146//Peroxisome;ko03320//PPAR signaling pathway;ko01212//Fatty acid metabolism;ko00280//Valine, leucine and isoleucine degradation;ko00071//Fatty acid degradation;ko00592//alpha-Linolenic acid metabolism;ko01040//Biosynthesis of unsaturated fatty acids	K07513;K07513;K07513;K07513;K07513;K07513;K07513;K07513	GO:0005777//peroxisome;GO:0043231//intracellular membrane-bounded organelle	GO:0003824//catalytic activity;GO:0016401//palmitoyl-CoA oxidase activity;GO:0016747//transferase activity, transferring acyl groups other than amino-acyl groups	GO:0000038//very long-chain fatty acid metabolic process;GO:0006635//fatty acid beta-oxidation;GO:0008206//bile acid metabolic process
MergePeak_5730	18	59753910	59754626	0.00762	0.124	111	59	54	49	31	47	2.830000	2.580000	3.770000	1.610000	0.880000	1.970000	3.060000	1.490000	-1.038219	Promoter (<=1kb)	59616989	59753767	136779	-	ENSBGRG00000005618	ENSBGRT00000010437	59616989	59753767	136779	-	ENSBGRG00000005618	ENSBGRT00000010481	-501	SDC2	syndecan 2 [Source:HGNC Symbol;Acc:HGNC:10659]	Environmental Information Processing;Human Diseases;Human Diseases;Human Diseases;Organismal Systems	Signaling molecules and interaction;Cancers;Cardiovascular diseases;Infectious diseases;Development and regeneration	ko04514//Cell adhesion molecules (CAMs);ko05205//Proteoglycans in cancer;ko05418//Fluid shear stress and atherosclerosis;ko05144//Malaria;ko04361//Axon regeneration	K16336;K16336;K16336;K16336;K16336	GO:0016020//membrane	GO:0030165//PDZ domain binding;GO:0042802//identical protein binding	-
MergePeak_949	10	6070217	6070665	0.00764	0.124	62	48	62	40	33	30	2.520000	3.350000	6.920000	2.100000	1.500000	2.010000	4.260000	1.870000	-1.187815	Promoter (<=1kb)	6070632	6070892	261	+	ENSBGRG00000021621	ENSBGRT00000039903	6070632	6070892	261	+	ENSBGRG00000021621	ENSBGRT00000039903	-191	SF3B5	splicing factor 3b subunit 5 [Source:HGNC Symbol;Acc:HGNC:21083]	Genetic Information Processing	Transcription	ko03040//Spliceosome	K12832	GO:0005634//nucleus;GO:0005654//nucleoplasm;GO:0005689//U12-type spliceosomal complex;GO:0071005//U2-type precatalytic spliceosome	GO:0003723//RNA binding;GO:1990935//splicing factor binding	GO:0000398//mRNA splicing, via spliceosome
MergePeak_14250	6	112525987	112526722	0.00766	0.124	109	47	29	29	28	37	2.700000	2.000000	1.970000	0.930000	0.770000	1.510000	2.220000	1.070000	-1.052949	Intron (ENSBGRT00000003978/ENSBGRG00000002076, intron 8 of 19)	112483757	112572178	88422	+	ENSBGRG00000002076	ENSBGRT00000003978	112483757	112572178	88422	+	ENSBGRG00000002076	ENSBGRT00000003978	42597	ENPEP	glutamyl aminopeptidase [Source:HGNC Symbol;Acc:HGNC:3355]	Organismal Systems	Endocrine system	ko04614//Renin-angiotensin system	K11141	GO:0005886//plasma membrane;GO:0005903//brush border;GO:0009897//external side of plasma membrane;GO:0016324//apical plasma membrane;GO:0031410//cytoplasmic vesicle;GO:0045177//apical part of cell	GO:0004177//aminopeptidase activity;GO:0008233//peptidase activity;GO:0008237//metallopeptidase activity;GO:0008270//zinc ion binding;GO:0070006//metalloaminopeptidase activity	GO:0001525//angiogenesis;GO:0003081//regulation of systemic arterial blood pressure by renin-angiotensin;GO:0006508//proteolysis;GO:0008283//cell proliferation;GO:0016477//cell migration;GO:0032835//glomerulus development
MergePeak_5133	17	52679774	52680153	0.00775	0.124	89	48	46	37	29	38	4.280000	3.960000	6.070000	2.300000	1.560000	3.000000	4.770000	2.290000	-1.058642	5' UTR	52679746	52687469	7724	+	ENSBGRG00000005188	ENSBGRT00000009582	52679746	52682405	2660	+	ENSBGRG00000005188	ENSBGRT00000009646	217	PNN	pinin, desmosome associated protein [Source:HGNC Symbol;Acc:HGNC:9162]	Genetic Information Processing;Genetic Information Processing	Translation;Translation	ko03013//RNA transport;ko03015//mRNA surveillance pathway	K13114;K13114	GO:0016607//nuclear speck;GO:0035145//exon-exon junction complex;GO:0071013//catalytic step 2 spliceosome	-	-
MergePeak_7929	20	59619744	59620414	0.00781	0.124	137	90	97	91	33	64	3.730000	4.200000	7.240000	3.200000	1.000000	2.860000	5.060000	2.350000	-1.106477	5' UTR	59600987	59620415	19429	-	ENSBGRG00000018112	ENSBGRT00000033166	59600987	59620415	19429	-	ENSBGRG00000018112	ENSBGRT00000033166	336	RUVBL2	RuvB like AAA ATPase 2 [Source:HGNC Symbol;Acc:HGNC:10475]	-	-	-	-	GO:0000812//Swr1 complex;GO:0005634//nucleus;GO:0005654//nucleoplasm;GO:0005719//nuclear euchromatin;GO:0005737//cytoplasm;GO:0005813//centrosome;GO:0005829//cytosol;GO:0031011//Ino80 complex;GO:0035267//NuA4 histone acetyltransferase complex;GO:0071339//MLL1 complex;GO:0097255//R2TP complex;GO:1990904//ribonucleoprotein complex	GO:0000978//RNA polymerase II proximal promoter sequence-specific DNA binding;GO:0000979//RNA polymerase II core promoter sequence-specific DNA binding;GO:0001094//TFIID-class transcription factor complex binding;GO:0003678//DNA helicase activity;GO:0003714//transcription corepressor activity;GO:0005524//ATP binding;GO:0008013//beta-catenin binding;GO:0016887//ATPase activity;GO:0017025//TBP-clas…	GO:0006338//chromatin remodeling;GO:0034644//cellular response to UV;GO:0035066//positive regulation of histone acetylation;GO:0043967//histone H4 acetylation;GO:0043968//histone H2A acetylation;GO:0045944//positive regulation of transcription by RNA polymerase II;GO:0071169//establishment of protein localization to chromatin;GO:0071392//cellular response to estradiol stimulus;GO:0071733//transcr…
MergePeak_6066	19	20618686	20619410	0.00786	0.124	103	75	58	65	38	41	2.590000	3.240000	4.010000	2.120000	1.070000	1.700000	3.280000	1.630000	-1.008824	Intron (ENSBGRT00000042611/ENSBGRG00000022981, intron 5 of 9)	20588681	20644789	56109	+	ENSBGRG00000022981	ENSBGRT00000042611	20588681	20644789	56109	+	ENSBGRG00000022981	ENSBGRT00000042611	30367	PLEKHM1	pleckstrin homology and RUN domain containing M1 [Source:HGNC Symbol;Acc:HGNC:29017]	Human Diseases	Infectious diseases	ko05132//Salmonella infection	K23282	GO:0005730//nucleolus;GO:0043231//intracellular membrane-bounded organelle	-	GO:0032418//lysosome localization;GO:0035556//intracellular signal transduction;GO:0045780//positive regulation of bone resorption;GO:1900029//positive regulation of ruffle assembly
MergePeak_12876	4	119986506	119987520	0.00786	0.124	97	46	44	39	35	35	1.740000	1.420000	2.170000	0.910000	0.700000	1.030000	1.780000	0.880000	-1.016302	Intron (ENSBGRT00000031163/ENSBGRG00000016959, intron 4 of 7)	119822638	120099404	276767	+	ENSBGRG00000016959	ENSBGRT00000031163	119822638	120099404	276767	+	ENSBGRG00000016959	ENSBGRT00000031163	164375	CDK6	cyclin dependent kinase 6 [Source:HGNC Symbol;Acc:HGNC:1777]	Human Diseases;Environmental Information Processing;Human Diseases;Human Diseases;Human Diseases;Human Diseases;Human Diseases;Human Diseases;Human Diseases;Human Diseases;Cellular Processes;Human Diseases;Human Diseases;Human Diseases;Human Diseases;Cellular Processes;Human Diseases;Cellular Processes;Human Diseases;Human Diseases;Human Diseases;Human Diseases;Human Diseases	Cancers;Signal transduction;Infectious diseases;Infectious diseases;Infectious diseases;Cancers;Infectious diseases;Infectious diseases;Infectious diseases;Cancers;Cell growth and death;Cancers;Endocrine and metabolic diseases;Infectious diseases;Cancers;Cell growth and death;Cancers;Cell growth and death;Cancers;Cancers;Cancers;Cancers;Cancers	ko05200//Pathways in cancer;ko04151//PI3K-Akt signaling pathway;ko05165//Human papillomavirus infection;ko05169//Epstein-Barr virus infection;ko05163//Human cytomegalovirus infection;ko05203//Viral carcinogenesis;ko05162//Measles;ko05167//Kaposi sarcoma-associated herpesvirus infection;ko05164//Influenza A;ko05225//Hepatocellular carcinoma;ko04218//Cellular senescence;ko05206//MicroRNAs in cancer…	K02091;K02091;K02091;K02091;K02091;K02091;K02091;K02091;K02091;K02091;K02091;K02091;K02091;K02091;K02091;K02091;K02091;K02091;K02091;K02091;K02091;K02091;K02091	GO:0000307//cyclin-dependent protein kinase holoenzyme complex;GO:0001726//ruffle;GO:0005634//nucleus;GO:0005654//nucleoplasm;GO:0005737//cytoplasm;GO:0005813//centrosome;GO:0005829//cytosol	GO:0004672//protein kinase activity;GO:0004693//cyclin-dependent protein serine/threonine kinase activity;GO:0005524//ATP binding;GO:0030332//cyclin binding;GO:0098770//FBXO family protein binding	GO:0001954//positive regulation of cell-matrix adhesion;GO:0003323//type B pancreatic cell development;GO:0006468//protein phosphorylation;GO:0009615//response to virus;GO:0010468//regulation of gene expression;GO:0042063//gliogenesis;GO:0042127//regulation of cell proliferation;GO:0043697//cell dedifferentiation;GO:0045638//negative regulation of myeloid cell differentiation;GO:0045646//regulati…
MergePeak_5172	17	63176752	63177390	0.00787	0.124	104	64	26	42	33	31	2.970000	3.140000	2.040000	1.550000	1.050000	1.460000	2.720000	1.350000	-1.010647	5' UTR	63176890	63197896	21007	+	ENSBGRG00000013598	ENSBGRT00000024951	63176890	63197896	21007	+	ENSBGRG00000013598	ENSBGRT00000024951	181	OTUB2	OTU deubiquitinase, ubiquitin aldehyde binding 2 [Source:HGNC Symbol;Acc:HGNC:20351]	-	-	-	-	-	GO:0004843//thiol-dependent ubiquitin-specific protease activity;GO:0016787//hydrolase activity	GO:0016579//protein deubiquitination;GO:0035871//protein K11-linked deubiquitination;GO:0070536//protein K63-linked deubiquitination;GO:0071108//protein K48-linked deubiquitination
MergePeak_5635	18	37788422	37789017	0.0079	0.124	69	51	30	27	34	26	2.110000	2.680000	2.520000	1.070000	1.160000	1.310000	2.440000	1.180000	-1.048094	Intron (ENSBGRT00000007961/ENSBGRG00000004195, intron 7 of 7)	37653276	37835419	182144	+	ENSBGRG00000004195	ENSBGRT00000007961	37653276	37835419	182144	+	ENSBGRG00000004195	ENSBGRT00000007961	135443	EIF3H	eukaryotic translation initiation factor 3 subunit H [Source:HGNC Symbol;Acc:HGNC:3273]	Human Diseases;Genetic Information Processing	Infectious diseases;Translation	ko05162//Measles;ko03013//RNA transport	K03247;K03247	GO:0005737//cytoplasm;GO:0005852//eukaryotic translation initiation factor 3 complex;GO:0071541//eukaryotic translation initiation factor 3 complex, eIF3m	GO:0003743//translation initiation factor activity;GO:0005515//protein binding	GO:0006413//translational initiation
MergePeak_11851	3	80935617	80936190	0.00791	0.124	89	57	61	59	28	33	2.830000	3.110000	5.330000	2.430000	0.990000	1.730000	3.760000	1.720000	-1.128324	Promoter (<=1kb)	80907429	80935565	28137	-	ENSBGRG00000005403	ENSBGRT00000009987	80907429	80935565	28137	-	ENSBGRG00000005403	ENSBGRT00000010099	-338	CTH	cystathionine gamma-lyase [Source:HGNC Symbol;Acc:HGNC:2501]	Metabolism;Metabolism;Metabolism;Metabolism;Metabolism	Global and overview maps;Global and overview maps;Amino acid metabolism;Amino acid metabolism;Metabolism of other amino acids	ko01100//Metabolic pathways;ko01230//Biosynthesis of amino acids;ko00270//Cysteine and methionine metabolism;ko00260//Glycine, serine and threonine metabolism;ko00450//Selenocompound metabolism	K01758;K01758;K01758;K01758;K01758	-	GO:0003824//catalytic activity;GO:0004123//cystathionine gamma-lyase activity;GO:0030170//pyridoxal phosphate binding;GO:0042802//identical protein binding;GO:0044540//L-cystine L-cysteine-lyase (deaminating)	GO:0018272//protein-pyridoxal-5-phosphate linkage via peptidyl-N6-pyridoxal phosphate-L-lysine;GO:0019343//cysteine biosynthetic process via cystathionine;GO:0019344//cysteine biosynthetic process;GO:0019346//transsulfuration;GO:0043066//negative regulation of apoptotic process;GO:0043123//positive regulation of I-kappaB kinase/NF-kappaB signaling;GO:0044524//protein sulfhydration;GO:0051092//pos…
MergePeak_9191	24	3313910	3314454	0.00793	0.124	100	45	56	47	39	34	3.350000	2.590000	5.150000	2.040000	1.460000	1.870000	3.700000	1.790000	-1.047566	Intron (ENSBGRT00000030290/ENSBGRG00000016498, intron 1 of 2)	3313214	3314281	1068	-	ENSBGRG00000016498	ENSBGRT00000030290	3313214	3314281	1068	-	ENSBGRG00000016498	ENSBGRT00000030290	99	H2AC7	XP_014137098.1 histone H2A-IV-like, partial [Falco cherrug]	Human Diseases;Human Diseases;Cellular Processes	Immune diseases;Substance dependence;Cell growth and death	ko05322//Systemic lupus erythematosus;ko05034//Alcoholism;ko04217//Necroptosis	K11251;K11251;K11251	GO:0000786//nucleosome	GO:0003677//DNA binding;GO:0046982//protein heterodimerization activity	-
MergePeak_7487	20	2104436	2105011	0.00801	0.124	96	46	43	45	30	31	3.040000	2.500000	3.740000	1.840000	1.060000	1.620000	3.090000	1.510000	-1.033058	Promoter (<=1kb)	2104812	2198493	93682	+	ENSBGRG00000013711	ENSBGRT00000025575	2104812	2162940	58129	+	ENSBGRG00000013711	ENSBGRT00000025727	-89	CEP89	centrosomal protein 89 [Source:HGNC Symbol;Acc:HGNC:25907]	-	-	-	-	GO:0000922//spindle pole;GO:0005813//centrosome;GO:0005814//centriole;GO:0005829//cytosol;GO:0005886//plasma membrane;GO:0031514//motile cilium;GO:0097539//ciliary transition fiber;GO:0097730//non-motile cilium	-	GO:0007005//mitochondrion organization;GO:0007268//chemical synaptic transmission;GO:0060271//cilium assembly;GO:1905515//non-motile cilium assembly
MergePeak_427	1	87725296	87725853	0.00801	0.124	101	85	82	68	48	55	3.310000	4.780000	7.370000	2.880000	1.750000	2.960000	5.150000	2.530000	-1.025435	Promoter (<=1kb)	87706586	87725523	18938	-	ENSBGRG00000001887	ENSBGRT00000003524	87706586	87725523	18938	-	ENSBGRG00000001887	ENSBGRT00000003524	-51	DNAJB11	NP_001029440.1 dnaJ homolog subfamily B member 11 precursor [Bos taurus]	Genetic Information Processing	Folding, sorting and degradation	ko04141//Protein processing in endoplasmic reticulum	K09517	GO:0005615//extracellular space;GO:0005634//nucleus;GO:0005737//cytoplasm	GO:0005102//signaling receptor binding;GO:0051082//unfolded protein binding	GO:0006457//protein folding;GO:0016556//mRNA modification;GO:0050768//negative regulation of neurogenesis
MergePeak_8659	22	26586268	26586748	0.00809	0.124	61	50	42	35	20	30	2.320000	3.260000	4.380000	1.720000	0.850000	1.870000	3.320000	1.480000	-1.165586	Intron (ENSBGRT00000049371/ENSBGRG00000026631, intron 1 of 7)	26436506	26713999	277494	-	ENSBGRG00000026631	ENSBGRT00000049371	26436506	26713999	277494	-	ENSBGRG00000026631	ENSBGRT00000049371	127491	PRICKLE2	prickle planar cell polarity protein 2 [Source:HGNC Symbol;Acc:HGNC:20340]	Environmental Information Processing	Signal transduction	ko04310//Wnt signaling pathway	K04511	GO:0005737//cytoplasm	GO:0005515//protein binding;GO:0008270//zinc ion binding;GO:0030234//enzyme regulator activity	-
MergePeak_538	1	105600389	105600998	0.00813	0.124	100	37	32	45	24	17	2.990000	1.900000	2.630000	1.740000	0.800000	0.840000	2.510000	1.130000	-1.151365	Intron (ENSBGRT00000011845/ENSBGRG00000006256, intron 2 of 17)	105560488	105631815	71328	-	ENSBGRG00000006256	ENSBGRT00000011845	105560488	105631815	71328	-	ENSBGRG00000006256	ENSBGRT00000011845	31122	PRKCI	protein kinase C iota [Source:HGNC Symbol;Acc:HGNC:9404]	Human Diseases;Environmental Information Processing;Cellular Processes;Environmental Information Processing;Cellular Processes;Organismal Systems;Organismal Systems;Environmental Information Processing	Infectious diseases;Signal transduction;Transport and catabolism;Signal transduction;Cellular community - eukaryotes;Endocrine system;Immune system;Signal transduction	ko05165//Human papillomavirus infection;ko04015//Rap1 signaling pathway;ko04144//Endocytosis;ko04390//Hippo signaling pathway;ko04530//Tight junction;ko04910//Insulin signaling pathway;ko04611//Platelet activation;ko04391//Hippo signaling pathway -fly	K06069;K06069;K06069;K06069;K06069;K06069;K06069;K06069	GO:0005634//nucleus;GO:0005737//cytoplasm;GO:0005829//cytosol;GO:0015630//microtubule cytoskeleton;GO:0016324//apical plasma membrane;GO:0043220//Schmidt-Lanterman incisure;GO:0045171//intercellular bridge;GO:0045177//apical part of cell	GO:0004672//protein kinase activity;GO:0004674//protein serine/threonine kinase activity;GO:0004697//protein kinase C activity;GO:0005515//protein binding;GO:0005524//ATP binding;GO:0005543//phospholipid binding	GO:0006468//protein phosphorylation;GO:0007015//actin filament organization;GO:0007163//establishment or maintenance of cell polarity;GO:0010976//positive regulation of neuron projection development;GO:0018105//peptidyl-serine phosphorylation;GO:0032869//cellular response to insulin stimulus;GO:0034351//negative regulation of glial cell apoptotic process;GO:0035089//establishment of apical/basal …
MergePeak_2079	11	76413304	76413831	0.00817	0.124	83	73	49	62	26	29	2.870000	4.340000	4.650000	2.770000	1.000000	1.650000	3.950000	1.810000	-1.125863	Intron (ENSBGRT00000012351/ENSBGRG00000006692, intron 3 of 35)	76330241	76457403	127163	-	ENSBGRG00000006692	ENSBGRT00000012351	76330241	76457403	127163	-	ENSBGRG00000006692	ENSBGRT00000012351	43836	LTBP2	latent transforming growth factor beta binding protein 2 [Source:HGNC Symbol;Acc:HGNC:6715]	-	-	-	-	-	GO:0005509//calcium ion binding	GO:0097435//supramolecular fiber organization
MergePeak_4709	16	69736986	69738092	0.00817	0.124	131	90	79	63	40	74	2.160000	2.550000	3.570000	1.340000	0.740000	2.010000	2.760000	1.360000	-1.021062	Promoter (<=1kb)	69738152	69748751	10600	+	ENSBGRG00000026401	ENSBGRT00000048861	69738152	69748751	10600	+	ENSBGRG00000026401	ENSBGRT00000048861	-613	MLEC	malectin [Source:HGNC Symbol;Acc:HGNC:28973]	-	-	-	-	-	GO:0019899//enzyme binding;GO:0030246//carbohydrate binding	-
MergePeak_1427	10	111529615	111530355	0.00818	0.124	111	106	63	74	36	56	2.740000	4.480000	4.260000	2.360000	0.990000	2.270000	3.830000	1.870000	-1.034306	Promoter (<=1kb)	111530412	111540881	10470	+	ENSBGRG00000004593	ENSBGRT00000008553	111530412	111540881	10470	+	ENSBGRG00000004593	ENSBGRT00000008553	-427	FBXO5	F-box protein 5 [Source:HGNC Symbol;Acc:HGNC:13584]	Cellular Processes	Cell growth and death	ko04114//Oocyte meiosis	K10292	GO:0005634//nucleus;GO:0005654//nucleoplasm;GO:0005737//cytoplasm;GO:0005819//spindle;GO:0072687//meiotic spindle	GO:0005515//protein binding;GO:0010997//anaphase-promoting complex binding;GO:0019901//protein kinase binding;GO:1990948//ubiquitin ligase inhibitor activity	GO:0001556//oocyte maturation;GO:0006275//regulation of DNA replication;GO:0007057//spindle assembly involved in female meiosis I;GO:0007346//regulation of mitotic cell cycle;GO:0008284//positive regulation of cell proliferation;GO:0010971//positive regulation of G2/M transition of mitotic cell cycle;GO:0016050//vesicle organization;GO:0032876//negative regulation of DNA endoreduplication;GO:0040…
MergePeak_16642	9	78333789	78334309	0.0082	0.124	86	44	28	25	31	30	3.020000	2.650000	2.690000	1.130000	1.210000	1.730000	2.790000	1.360000	-1.036658	Intron (ENSBGRT00000012906/ENSBGRG00000006907, intron 7 of 18)	77526728	79034773	1508046	-	ENSBGRG00000006907	ENSBGRT00000012906	77526728	79034773	1508046	-	ENSBGRG00000006907	ENSBGRT00000012906	700724	CTNNA2	catenin alpha 2 [Source:HGNC Symbol;Acc:HGNC:2510]	Human Diseases;Environmental Information Processing;Human Diseases;Organismal Systems;Human Diseases;Human Diseases;Cellular Processes;Human Diseases	Cancers;Signal transduction;Cancers;Immune system;Infectious diseases;Cardiovascular diseases;Cellular community - eukaryotes;Cancers	ko05200//Pathways in cancer;ko04390//Hippo signaling pathway;ko05226//Gastric cancer;ko04670//Leukocyte transendothelial migration;ko05100//Bacterial invasion of epithelial cells;ko05412//Arrhythmogenic right ventricular cardiomyopathy (ARVC);ko04520//Adherens junction;ko05213//Endometrial cancer	K05691;K05691;K05691;K05691;K05691;K05691;K05691;K05691	GO:0005737//cytoplasm;GO:0005912//adherens junction;GO:0014069//postsynaptic density;GO:0015629//actin cytoskeleton;GO:0016323//basolateral plasma membrane;GO:0030027//lamellipodium;GO:0030424//axon;GO:0098686//hippocampal mossy fiber to CA3 synapse;GO:0098688//parallel fiber to Purkinje cell synapse;GO:0098831//presynaptic active zone cytoplasmic component;GO:0098888//extrinsic component of pres…	GO:0005198//structural molecule activity;GO:0042802//identical protein binding;GO:0045296//cadherin binding;GO:0051015//actin filament binding	GO:0007155//cell adhesion;GO:0007409//axonogenesis;GO:0010975//regulation of neuron projection development;GO:0021942//radial glia guided migration of Purkinje cell;GO:0034316//negative regulation of Arp2/3 complex-mediated actin nucleation;GO:0048813//dendrite morphogenesis;GO:0048854//brain morphogenesis;GO:0051823//regulation of synapse structural plasticity;GO:0060134//prepulse inhibition;GO:…
MergePeak_4171	15	45162353	45162959	0.00829	0.124	80	48	58	35	43	36	2.410000	2.480000	4.790000	1.360000	1.440000	1.780000	3.230000	1.530000	-1.078003	Promoter (<=1kb)	45106884	45162485	55602	-	ENSBGRG00000010072	ENSBGRT00000018440	45106884	45162485	55602	-	ENSBGRG00000010072	ENSBGRT00000018440	-171	PSPC1	paraspeckle component 1 [Source:HGNC Symbol;Acc:HGNC:20320]	-	-	-	-	GO:0001650//fibrillar center;GO:0005654//nucleoplasm;GO:0042382//paraspeckles	GO:0003676//nucleic acid binding;GO:0003723//RNA binding;GO:0070888//E-box binding	GO:0002218//activation of innate immune response;GO:0042752//regulation of circadian rhythm;GO:0045892//negative regulation of transcription, DNA-templated
MergePeak_1070	10	25323725	25324317	0.00841	0.124	97	58	80	68	36	37	2.990000	3.070000	6.760000	2.710000	1.240000	1.870000	4.270000	1.940000	-1.138179	Intron (ENSBGRT00000040057/ENSBGRG00000021677, intron 1 of 12)	25296348	25325164	28817	-	ENSBGRG00000021677	ENSBGRT00000040057	25296348	25325164	28817	-	ENSBGRG00000021677	ENSBGRT00000040057	1143	SYNCRIP	synaptotagmin binding cytoplasmic RNA interacting protein [Source:HGNC Symbol;Acc:HGNC:16918]	-	-	-	-	GO:0070937//CRD-mediated mRNA stability complex;GO:0071013//catalytic step 2 spliceosome;GO:0097452//GAIT complex;GO:1990904//ribonucleoprotein complex	GO:0003676//nucleic acid binding	GO:0017148//negative regulation of translation;GO:0070934//CRD-mediated mRNA stabilization;GO:0071346//cellular response to interferon-gamma
MergePeak_8126	20	70103947	70104645	0.00845	0.124	116	47	97	64	57	39	3.030000	2.110000	6.950000	2.160000	1.660000	1.670000	4.030000	1.830000	-1.138936	Promoter (<=1kb)	70080198	70103870	23673	-	ENSBGRG00000024842	ENSBGRT00000046020	70080198	70103870	23673	-	ENSBGRG00000024842	ENSBGRT00000046020	-426	KMT2B	lysine methyltransferase 2B [Source:HGNC Symbol;Acc:HGNC:15840]	Metabolism;Metabolism	Global and overview maps;Amino acid metabolism	ko01100//Metabolic pathways;ko00310//Lysine degradation	K14959;K14959	GO:0005634//nucleus;GO:0035097//histone methyltransferase complex	GO:0003677//DNA binding;GO:0005515//protein binding;GO:0008270//zinc ion binding;GO:0042800//histone methyltransferase activity (H3-K4 specific);GO:0045322//unmethylated CpG binding	GO:0001541//ovarian follicle development;GO:0006355//regulation of transcription, DNA-templated;GO:0007613//memory;GO:0009994//oocyte differentiation;GO:0016458//gene silencing;GO:0030728//ovulation;GO:0034968//histone lysine methylation;GO:0044648//histone H3-K4 dimethylation;GO:0051568//histone H3-K4 methylation;GO:0051569//regulation of histone H3-K4 methylation;GO:0080182//histone H3-K4 trime…
MergePeak_15292	8	11600571	11601262	0.00847	0.124	94	67	63	50	36	49	2.480000	3.030000	4.560000	1.700000	1.060000	2.130000	3.360000	1.630000	-1.043589	Promoter (<=1kb)	11601132	11608298	7167	+	ENSBGRG00000006775	ENSBGRT00000012516	11601132	11606607	5476	+	ENSBGRG00000006775	ENSBGRT00000012562	-216	GCDH	glutaryl-CoA dehydrogenase [Source:HGNC Symbol;Acc:HGNC:4189]	Metabolism;Metabolism;Metabolism;Metabolism	Global and overview maps;Amino acid metabolism;Amino acid metabolism;Lipid metabolism	ko01100//Metabolic pathways;ko00310//Lysine degradation;ko00380//Tryptophan metabolism;ko00071//Fatty acid degradation	K00252;K00252;K00252;K00252	GO:0005739//mitochondrion	GO:0003995//acyl-CoA dehydrogenase activity;GO:0016627//oxidoreductase activity, acting on the CH-CH group of donors;GO:0050660//flavin adenine dinucleotide binding	GO:0033539//fatty acid beta-oxidation using acyl-CoA dehydrogenase;GO:0055114//oxidation-reduction process
MergePeak_12646	4	70232579	70233193	0.00847	0.124	84	53	73	44	49	39	2.490000	2.700000	5.950000	1.690000	1.620000	1.900000	3.710000	1.740000	-1.092332	Intron (ENSBGRT00000003206/ENSBGRG00000001704, intron 1 of 8)	70231974	70363636	131663	+	ENSBGRG00000001704	ENSBGRT00000003206	70231974	70363636	131663	+	ENSBGRG00000001704	ENSBGRT00000003206	912	ZNF277	zinc finger protein 277 [Source:HGNC Symbol;Acc:HGNC:13070]	-	-	-	-	-	GO:0000978//RNA polymerase II proximal promoter sequence-specific DNA binding;GO:0003676//nucleic acid binding	GO:0070301//cellular response to hydrogen peroxide;GO:2000772//regulation of cellular senescence
MergePeak_7785	20	50942887	50943404	0.00852	0.124	71	54	56	18	51	36	2.500000	3.270000	5.420000	0.820000	2.010000	2.090000	3.730000	1.640000	-1.185480	5' UTR	50943093	50967437	24345	+	ENSBGRG00000021653	ENSBGRT00000040005	50943093	50967437	24345	+	ENSBGRG00000021653	ENSBGRT00000040005	52	PRKCG	protein kinase C gamma [Source:HGNC Symbol;Acc:HGNC:9402]	Human Diseases;Environmental Information Processing;Environmental Information Processing;Human Diseases;Environmental Information Processing;Environmental Information Processing;Human Diseases;Human Diseases;Cellular Processes;Human Diseases;Environmental Information Processing;Human Diseases;Environmental Information Processing;Organismal Systems;Human Diseases;Organismal Systems;Organismal Syst…	Cancers;Signal transduction;Signal transduction;Infectious disease: viral;Signal transduction;Signal transduction;Infectious diseases;Cancers;Cellular community - eukaryotes;Cancers;Signal transduction;Infectious diseases;Signal transduction;Nervous system;Cancers;Endocrine system;Immune system;Circulatory system;Nervous system;Immune system;Infectious diseases;Signal transduction;Endocrine syste…	ko05200//Pathways in cancer;ko04014//Ras signaling pathway;ko04010//MAPK signaling pathway;ko05170//Human immunodeficiency virus 1 infection;ko04015//Rap1 signaling pathway;ko04020//Calcium signaling pathway;ko05163//Human cytomegalovirus infection;ko05205//Proteoglycans in cancer;ko04510//Focal adhesion;ko05225//Hepatocellular carcinoma;ko04150//mTOR signaling pathway;ko05161//Hepatitis B;ko0431…	K19663;K19663;K19663;K19663;K19663;K19663;K19663;K19663;K19663;K19663;K19663;K19663;K19663;K19663;K19663;K19663;K19663;K19663;K19663;K19663;K19663;K19663;K19663;K19663;K19663;K19663;K19663;K19663;K19663;K19663;K19663;K19663;K19663;K19663;K19663;K19663;K19663;K19663;K19663;K19663;K19663;K19663;K19663;K19663;K19663;K19663;K19663;K19663;K19663;K19663;K19663;K19663;K19663;K19663;K19663;K19663;K19663	-	GO:0004672//protein kinase activity;GO:0004674//protein serine/threonine kinase activity;GO:0004697//protein kinase C activity;GO:0004712//protein serine/threonine/tyrosine kinase activity;GO:0005524//ATP binding;GO:0008270//zinc ion binding	GO:0006468//protein phosphorylation;GO:0016310//phosphorylation;GO:0031397//negative regulation of protein ubiquitination;GO:0032425//positive regulation of mismatch repair;GO:0035556//intracellular signal transduction;GO:0042177//negative regulation of protein catabolic process
MergePeak_120	1	38439476	38439989	0.00852	0.124	80	44	40	42	30	24	2.840000	2.680000	3.900000	1.930000	1.190000	1.400000	3.140000	1.510000	-1.056216	Intron (ENSBGRT00000000257/ENSBGRG00000000154, intron 1 of 3)	38314924	38451005	136082	-	ENSBGRG00000000154	ENSBGRT00000000257	38314924	38451005	136082	-	ENSBGRG00000000154	ENSBGRT00000000257	11273	RCAN1	regulator of calcineurin 1 [Source:HGNC Symbol;Acc:HGNC:3040]	Human Diseases;Organismal Systems;Organismal Systems	Infectious diseases;Endocrine system;Endocrine system	ko05167//Kaposi sarcoma-associated herpesvirus infection;ko04921//Oxytocin signaling pathway;ko04919//Thyroid hormone signaling pathway	K17901;K17901;K17901	-	GO:0003676//nucleic acid binding	GO:0019722//calcium-mediated signaling;GO:0033173//calcineurin-NFAT signaling cascade
MergePeak_2489	12	44401710	44402127	0.00853	0.124	80	46	47	33	30	37	3.500000	3.450000	5.640000	1.860000	1.460000	2.660000	4.200000	1.990000	-1.077621	Promoter (1-2kb)	44403350	44595700	192351	+	ENSBGRG00000010669	ENSBGRT00000020332	44403350	44595700	192351	+	ENSBGRG00000010669	ENSBGRT00000020332	-1432	C20orf194	chromosome 20 open reading frame 194 [Source:HGNC Symbol;Acc:HGNC:17721]	-	-	-	-	-	-	-
MergePeak_16185	9	16178655	16179104	0.00853	0.124	80	65	64	62	17	33	3.250000	4.530000	7.130000	3.250000	0.770000	2.200000	4.970000	2.070000	-1.263615	Promoter (<=1kb)	16179172	16181091	1920	+	ENSBGRG00000011047	ENSBGRT00000020232	16179172	16180381	1210	+	ENSBGRG00000011047	ENSBGRT00000020317	-293	TUBB4B	PNJ03372.1 TUBB8 isoform 4 [Pongo abelii]	Human Diseases;Human Diseases;Human Diseases;Cellular Processes;Cellular Processes	Neurodegenerative diseases;Neurodegenerative diseases;Infectious diseases;Transport and catabolism;Cellular community - eukaryotes	ko05010//Alzheimer disease;ko05016//Huntington disease;ko05130//Pathogenic Escherichia coli infection;ko04145//Phagosome;ko04540//Gap junction	K07375;K07375;K07375;K07375;K07375	GO:0005874//microtubule	GO:0003924//GTPase activity	GO:0007017//microtubule-based process
MergePeak_8744	22	44291783	44292340	0.0086	0.124	60	51	37	34	27	26	1.960000	2.870000	3.320000	1.440000	0.990000	1.400000	2.720000	1.280000	-1.087463	Promoter (<=1kb)	44292518	44319961	27444	+	ENSBGRG00000026138	ENSBGRT00000048355	44292518	44319961	27444	+	ENSBGRG00000026138	ENSBGRT00000048355	-457	EDEM1	ER degradation enhancing alpha-mannosidase like protein 1 [Source:HGNC Symbol;Acc:HGNC:18967]	Genetic Information Processing	Folding, sorting and degradation	ko04141//Protein processing in endoplasmic reticulum	K10084	GO:0005783//endoplasmic reticulum;GO:0016020//membrane;GO:0016235//aggresome;GO:0030176//integral component of endoplasmic reticulum membrane	GO:0003824//catalytic activity;GO:0004571//mannosyl-oligosaccharide 1,2-alpha-mannosidase activity;GO:0005509//calcium ion binding;GO:0051787//misfolded protein binding	GO:0030433//ubiquitin-dependent ERAD pathway;GO:0036510//trimming of terminal mannose on C branch;GO:0097466//ubiquitin-dependent glycoprotein ERAD pathway;GO:1904154//positive regulation of retrograde protein transport, ER to cytosol;GO:1904382//mannose trimming involved in glycoprotein ERAD pathway
MergePeak_11029	29	7110611	7111174	0.00863	0.124	60	49	40	31	25	30	1.940000	2.720000	3.550000	1.300000	0.900000	1.600000	2.740000	1.270000	-1.109347	Intron (ENSBGRT00000039027/ENSBGRG00000021143, intron 1 of 1)	7105133	7126027	20895	+	ENSBGRG00000021143	ENSBGRT00000039027	7105133	7126027	20895	+	ENSBGRG00000021143	ENSBGRT00000039027	5759	-	-	-	-	-	-	-	-	-
MergePeak_12418	4	28355572	28356213	0.00873	0.124	76	49	47	37	41	29	2.160000	2.390000	3.670000	1.360000	1.300000	1.360000	2.740000	1.340000	-1.031943	Promoter (<=1kb)	28355892	28389319	33428	+	ENSBGRG00000006532	ENSBGRT00000012162	28355892	28389319	33428	+	ENSBGRG00000006532	ENSBGRT00000012162	0	TMEM209	transmembrane protein 209 [Source:HGNC Symbol;Acc:HGNC:21898]	-	-	-	-	-	-	-
MergePeak_7967	20	61468053	61468692	0.00876	0.124	79	52	37	38	40	25	2.250000	2.550000	2.900000	1.400000	1.270000	1.170000	2.570000	1.280000	-1.005625	Intron (ENSBGRT00000030164/ENSBGRG00000016330, intron 2 of 5)	61446195	61523299	77105	-	ENSBGRG00000016330	ENSBGRT00000030164	61446195	61523299	77105	-	ENSBGRG00000016330	ENSBGRT00000030164	54927	ARHGAP35	Rho GTPase activating protein 35 [Source:HGNC Symbol;Acc:HGNC:4591]	Cellular Processes;Cellular Processes;Organismal Systems;Organismal Systems	Cell motility;Cellular community - eukaryotes;Immune system;Immune system	ko04810//Regulation of actin cytoskeleton;ko04510//Focal adhesion;ko04670//Leukocyte transendothelial migration;ko04611//Platelet activation	K05732;K05732;K05732;K05732	GO:0005737//cytoplasm;GO:0015629//actin cytoskeleton;GO:0036064//ciliary basal body	GO:0003924//GTPase activity;GO:0005096//GTPase activator activity;GO:0005525//GTP binding;GO:0005543//phospholipid binding	GO:0001843//neural tube closure;GO:0007165//signal transduction;GO:0007411//axon guidance;GO:0007413//axonal fasciculation;GO:0008064//regulation of actin polymerization or depolymerization;GO:0008360//regulation of cell shape;GO:0010976//positive regulation of neuron projection development;GO:0016477//cell migration;GO:0021955//central nervous system neuron axonogenesis;GO:0030879//mammary gland…
MergePeak_8775	22	49300569	49301246	0.0088	0.124	59	45	50	30	42	23	1.590000	2.080000	3.700000	1.040000	1.260000	1.020000	2.460000	1.110000	-1.148099	Intron (ENSBGRT00000024946/ENSBGRG00000013609, intron 1 of 2)	49299516	49309407	9892	+	ENSBGRG00000013609	ENSBGRT00000024946	49299516	49309407	9892	+	ENSBGRG00000013609	ENSBGRT00000024946	1391	BRK1	BRICK1 subunit of SCAR/WAVE actin nucleating complex [Source:HGNC Symbol;Acc:HGNC:23057]	Human Diseases;Human Diseases;Cellular Processes	Infectious diseases;Infectious diseases;Cell motility	ko05132//Salmonella infection;ko05130//Pathogenic Escherichia coli infection;ko04810//Regulation of actin cytoskeleton	K05752;K05752;K05752	GO:0030027//lamellipodium;GO:0031209//SCAR complex	GO:0042802//identical protein binding;GO:0044877//protein-containing complex binding;GO:0048365//Rac GTPase binding	GO:0001701//in utero embryonic development;GO:0007015//actin filament organization;GO:0008284//positive regulation of cell proliferation;GO:0010592//positive regulation of lamellipodium assembly;GO:0016601//Rac protein signal transduction;GO:0030036//actin cytoskeleton organization;GO:0031334//positive regulation of protein complex assembly;GO:0048870//cell motility;GO:2000601//positive regulatio…
MergePeak_16277	9	20280614	20281055	0.00883	0.124	75	69	43	50	22	33	3.100000	4.900000	4.880000	2.670000	1.010000	2.240000	4.290000	1.970000	-1.122782	Exon (ENSBGRT00000049695/ENSBGRG00000026800, exon 1 of 11)	20260161	20280879	20719	-	ENSBGRG00000026800	ENSBGRT00000049695	20260161	20280879	20719	-	ENSBGRG00000026800	ENSBGRT00000049695	45	ANKRD23	XP_026343058.1 ankyrin repeat domain-containing protein 39 isoform X1 [Ursus arctos horribilis]	-	-	-	-	-	GO:0005515//protein binding;GO:0031432//titin binding	-
MergePeak_16010	8	120295448	120296176	0.00885	0.124	67	38	76	34	41	33	1.680000	1.630000	5.220000	1.100000	1.150000	1.360000	2.840000	1.200000	-1.242857	Promoter (<=1kb)	120296014	120340695	44682	+	ENSBGRG00000011017	ENSBGRT00000020643	120296014	120340695	44682	+	ENSBGRG00000011017	ENSBGRT00000020643	-202	WDR36	WD repeat domain 36 [Source:HGNC Symbol;Acc:HGNC:30696]	Genetic Information Processing	Translation	ko03008//Ribosome biogenesis in eukaryotes	K14554	GO:0005730//nucleolus;GO:0032040//small-subunit processome	GO:0005515//protein binding	GO:0001895//retina homeostasis;GO:0006364//rRNA processing;GO:0030516//regulation of axon extension
MergePeak_9348	24	18857201	18857872	0.00888	0.124	89	60	73	61	38	38	2.420000	2.800000	5.440000	2.140000	1.150000	1.700000	3.550000	1.660000	-1.096636	Promoter (<=1kb)	18857860	18864996	7137	+	ENSBGRG00000019931	ENSBGRT00000036865	18857860	18864780	6921	+	ENSBGRG00000019931	ENSBGRT00000037016	-324	MRPL2	NP_001035617.2 39S ribosomal protein L2, mitochondrial [Bos taurus]	Genetic Information Processing	Translation	ko03010//Ribosome	K02886	GO:0005840//ribosome	GO:0003735//structural constituent of ribosome	GO:0006412//translation
MergePeak_8738	22	44082172	44082497	0.00894	0.124	87	33	37	30	26	29	4.880000	3.180000	5.700000	2.170000	1.630000	2.670000	4.590000	2.160000	-1.087463	Promoter (<=1kb)	44083150	44087106	3957	+	ENSBGRG00000026121	ENSBGRT00000048325	44083150	44087106	3957	+	ENSBGRG00000026121	ENSBGRT00000048325	-816	BHLHE40	basic helix-loop-helix family member e40 [Source:HGNC Symbol;Acc:HGNC:1046]	Organismal Systems	Environmental adaptation	ko04710//Circadian rhythm	K03729	GO:0005634//nucleus;GO:0016604//nuclear body	GO:0000978//RNA polymerase II proximal promoter sequence-specific DNA binding;GO:0000981//DNA-binding transcription factor activity, RNA polymerase II-specific;GO:0001102//RNA polymerase II activating transcription factor binding;GO:0001227//DNA-binding transcription repressor activity, RNA polymerase II-specific;GO:0003677//DNA binding;GO:0003714//transcription corepressor activity;GO:0019904//p…	GO:0000122//negative regulation of transcription by RNA polymerase II;GO:0006355//regulation of transcription, DNA-templated;GO:0007623//circadian rhythm;GO:0009416//response to light stimulus;GO:0032922//circadian regulation of gene expression;GO:0042752//regulation of circadian rhythm;GO:0043153//entrainment of circadian clock by photoperiod;GO:0043433//negative regulation of DNA-binding transc…
MergePeak_10194	26	18040549	18041189	0.009	0.124	103	54	80	58	49	42	2.930000	2.640000	6.250000	2.140000	1.560000	1.970000	3.940000	1.890000	-1.059809	Promoter (<=1kb)	18041188	18044192	3005	+	ENSBGRG00000026080	ENSBGRT00000048235	18041188	18044192	3005	+	ENSBGRG00000026080	ENSBGRT00000048235	-319	PAGR1	PAXIP1 associated glutamate rich protein 1 [Source:HGNC Symbol;Acc:HGNC:28707]	-	-	-	-	GO:0005634//nucleus;GO:0035097//histone methyltransferase complex;GO:0044666//MLL3/4 complex	GO:0030331//estrogen receptor binding	GO:0033148//positive regulation of intracellular estrogen receptor signaling pathway;GO:0045944//positive regulation of transcription by RNA polymerase II;GO:1902808//positive regulation of cell cycle G1/S phase transition
MergePeak_13370	5	76728423	76729061	0.00912	0.124	84	52	52	45	23	38	2.400000	2.550000	4.080000	1.660000	0.730000	1.790000	3.010000	1.390000	-1.114679	Promoter (<=1kb)	76714958	76728523	13566	-	ENSBGRG00000001347	ENSBGRT00000002565	76714958	76728523	13566	-	ENSBGRG00000001347	ENSBGRT00000002592	-219	LMBR1L	limb development membrane protein 1 like [Source:HGNC Symbol;Acc:HGNC:18268]	-	-	-	-	GO:0005789//endoplasmic reticulum membrane;GO:0005886//plasma membrane;GO:0005887//integral component of plasma membrane	GO:0004888//transmembrane signaling receptor activity	GO:0006898//receptor-mediated endocytosis;GO:0007165//signal transduction;GO:0030217//T cell differentiation;GO:0042098//T cell proliferation;GO:0060218//hematopoietic stem cell differentiation;GO:0070231//T cell apoptotic process;GO:0090090//negative regulation of canonical Wnt signaling pathway
MergePeak_15309	8	12535847	12536245	0.00912	0.124	84	56	67	65	30	27	3.850000	4.400000	8.420000	3.850000	1.530000	2.030000	5.560000	2.470000	-1.170574	Promoter (<=1kb)	12536445	12563306	26862	+	ENSBGRG00000021668	ENSBGRT00000040155	12536445	12563306	26862	+	ENSBGRG00000021668	ENSBGRT00000040155	-399	ZSWIM4	zinc finger SWIM-type containing 4 [Source:HGNC Symbol;Acc:HGNC:25704]	-	-	-	-	-	GO:0008270//zinc ion binding	-
MergePeak_6615	2	2799501	2800178	0.00913	0.124	149	47	79	55	31	59	4.010000	2.170000	5.840000	1.910000	0.930000	2.610000	4.010000	1.820000	-1.139664	Promoter (<=1kb)	2762185	2799603	37419	-	ENSBGRG00000003404	ENSBGRT00000006333	2762185	2799603	37419	-	ENSBGRG00000003404	ENSBGRT00000006395	-236	ALDH4A1	aldehyde dehydrogenase 4 family member A1 [Source:HGNC Symbol;Acc:HGNC:406]	Metabolism;Metabolism;Metabolism	Global and overview maps;Amino acid metabolism;Amino acid metabolism	ko01100//Metabolic pathways;ko00330//Arginine and proline metabolism;ko00250//Alanine, aspartate and glutamate metabolism	K00294;K00294;K00294	-	GO:0003842//1-pyrroline-5-carboxylate dehydrogenase activity;GO:0004029//aldehyde dehydrogenase (NAD) activity;GO:0016491//oxidoreductase activity;GO:0016620//oxidoreductase activity, acting on the aldehyde or oxo group of donors, NAD or NADP as acceptor;GO:0042802//identical protein binding	GO:0010133//proline catabolic process to glutamate;GO:0055114//oxidation-reduction process
MergePeak_6249	19	31797932	31798358	0.00915	0.124	58	49	40	34	31	24	2.480000	3.600000	4.700000	1.880000	1.480000	1.690000	3.590000	1.680000	-1.095523	Promoter (<=1kb)	31778505	31797804	19300	-	ENSBGRG00000010601	ENSBGRT00000019447	31778505	31797804	19300	-	ENSBGRG00000010601	ENSBGRT00000019447	-341	MAP2K3	mitogen-activated protein kinase kinase 3 [Source:HGNC Symbol;Acc:HGNC:6843]	Environmental Information Processing;Human Diseases;Human Diseases;Organismal Systems;Environmental Information Processing;Human Diseases;Human Diseases;Human Diseases;Cellular Processes;Human Diseases;Human Diseases;Organismal Systems;Environmental Information Processing;Organismal Systems;Organismal Systems;Environmental Information Processing;Organismal Systems;Organismal Systems;Human Disease…	Signal transduction;Infectious disease: viral;Infectious diseases;Environmental adaptation;Signal transduction;Infectious diseases;Infectious disease: bacterial;Infectious diseases;Cell growth and death;Cancer: overview;Infectious diseases;Endocrine system;Signal transduction;Immune system;Sensory system;Signal transduction;Endocrine system;Immune system;Neurodegenerative diseases;Immune system	ko04010//MAPK signaling pathway;ko05170//Human immunodeficiency virus 1 infection;ko05169//Epstein-Barr virus infection;ko04714//Thermogenesis;ko04015//Rap1 signaling pathway;ko05132//Salmonella infection;ko05135//Yersinia infection;ko05161//Hepatitis B;ko04218//Cellular senescence;ko05235//PD-L1 expression and PD-1 checkpoint pathway in cancer;ko05145//Toxoplasmosis;ko04935//Growth hormone synth…	K04432;K04432;K04432;K04432;K04432;K04432;K04432;K04432;K04432;K04432;K04432;K04432;K04432;K04432;K04432;K04432;K04432;K04432;K04432;K04432	-	GO:0004672//protein kinase activity;GO:0004708//MAP kinase kinase activity;GO:0005524//ATP binding;GO:0019901//protein kinase binding	GO:0000165//MAPK cascade;GO:0000187//activation of MAPK activity;GO:0006468//protein phosphorylation;GO:0006954//inflammatory response;GO:0035924//cellular response to vascular endothelial growth factor stimulus;GO:0038066//p38MAPK cascade;GO:0042035//regulation of cytokine biosynthetic process;GO:0043536//positive regulation of blood vessel endothelial cell migration;GO:0045860//positive regulat…
MergePeak_1986	11	66029198	66029660	0.0092	0.125	60	44	50	32	22	33	2.370000	2.980000	5.420000	1.630000	0.970000	2.140000	3.590000	1.580000	-1.184059	Promoter (<=1kb)	66029649	66092119	62471	+	ENSBGRG00000013123	ENSBGRT00000024082	66029649	66092119	62471	+	ENSBGRG00000013123	ENSBGRT00000024082	-220	MTHFD1	methylenetetrahydrofolate dehydrogenase, cyclohydrolase and formyltetrahydrofolate synthetase 1 [Source:HGNC Symbol;Acc:HGNC:7432]	Metabolism;Metabolism	Global and overview maps;Metabolism of cofactors and vitamins	ko01100//Metabolic pathways;ko00670//One carbon pool by folate	K00288;K00288	-	GO:0003824//catalytic activity;GO:0004329//formate-tetrahydrofolate ligase activity;GO:0004487//methylenetetrahydrofolate dehydrogenase (NAD+) activity;GO:0004488//methylenetetrahydrofolate dehydrogenase (NADP+) activity;GO:0005524//ATP binding	GO:0001780//neutrophil homeostasis;GO:0001843//neural tube closure;GO:0006164//purine nucleotide biosynthetic process;GO:0006555//methionine metabolic process;GO:0007507//heart development;GO:0009069//serine family amino acid metabolic process;GO:0009257//10-formyltetrahydrofolate biosynthetic process;GO:0019346//transsulfuration;GO:0035999//tetrahydrofolate interconversion;GO:0055114//oxidation-…
MergePeak_1140	10	47338067	47338516	0.00934	0.126	81	42	30	27	35	26	3.290000	2.930000	3.340000	1.420000	1.590000	1.740000	3.190000	1.580000	-1.013632	Intron (ENSBGRT00000010745/ENSBGRG00000005685, intron 3 of 23)	47290582	47572012	281431	+	ENSBGRG00000005685	ENSBGRT00000010745	47290582	47572012	281431	+	ENSBGRG00000005685	ENSBGRT00000010745	47709	CRYBG1	crystallin beta-gamma domain containing 1 [Source:HGNC Symbol;Acc:HGNC:356]	-	-	-	-	-	-	-
MergePeak_7411	2	144707875	144708351	0.0094	0.126	93	38	34	38	21	28	3.560000	2.500000	3.570000	1.880000	0.900000	1.760000	3.210000	1.510000	-1.088025	Intron (ENSBGRT00000005120/ENSBGRG00000002703, intron 2 of 14)	144672586	144720569	47984	-	ENSBGRG00000002703	ENSBGRT00000005120	144672586	144720569	47984	-	ENSBGRG00000002703	ENSBGRT00000005120	12456	IWS1	interacts with SUPT6H, CTD assembly factor 1 [Source:HGNC Symbol;Acc:HGNC:25467]	-	-	-	-	GO:0005634//nucleus;GO:0005654//nucleoplasm	-	GO:0010793//regulation of mRNA export from nucleus;GO:0050684//regulation of mRNA processing;GO:0090239//regulation of histone H4 acetylation;GO:2001253//regulation of histone H3-K36 trimethylation
MergePeak_13093	5	33959651	33960205	0.00945	0.126	86	36	47	37	28	31	2.830000	2.030000	4.240000	1.570000	1.030000	1.680000	3.030000	1.430000	-1.083303	Intron (ENSBGRT00000027479/ENSBGRG00000014385, intron 1 of 16)	33700276	34064425	364150	-	ENSBGRG00000014385	ENSBGRT00000027479	33700276	34064425	364150	-	ENSBGRG00000014385	ENSBGRT00000027479	104497	BTBD11	BTB domain containing 11 [Source:HGNC Symbol;Acc:HGNC:23844]	-	-	-	-	-	GO:0005515//protein binding;GO:0046982//protein heterodimerization activity	GO:0060395//SMAD protein signal transduction
MergePeak_1941	11	56501472	56502136	0.00948	0.126	84	51	73	48	43	39	2.310000	2.400000	5.500000	1.700000	1.320000	1.760000	3.400000	1.590000	-1.096508	Exon (ENSBGRT00000007033/ENSBGRG00000003787, exon 1 of 13)	56430408	56502489	72082	-	ENSBGRG00000003787	ENSBGRT00000007033	56430408	56502489	72082	-	ENSBGRG00000003787	ENSBGRT00000007033	685	ATG14	autophagy related 14 [Source:HGNC Symbol;Acc:HGNC:19962]	Human Diseases;Human Diseases;Human Diseases;Human Diseases;Cellular Processes;Human Diseases	Neurodegenerative diseases;Neurodegenerative diseases;Infectious diseases;Infectious diseases;Transport and catabolism;Neurodegenerative disease	ko05010//Alzheimer disease;ko05016//Huntington disease;ko05131//Shigellosis;ko05167//Kaposi sarcoma-associated herpesvirus infection;ko04140//Autophagy - animal;ko05017//Spinocerebellar ataxia	K17889;K17889;K17889;K17889;K17889;K17889	GO:0005776//autophagosome;GO:0005930//axoneme;GO:0034045//phagophore assembly site membrane;GO:0035032//phosphatidylinositol 3-kinase complex, class III;GO:0044233//Mitochondria-associated ER Membrane;GO:0045335//phagocytic vesicle;GO:0097629//extrinsic component of omegasome membrane;GO:0097632//extrinsic component of phagophore assembly site membrane	GO:0051020//GTPase binding	GO:0000045//autophagosome assembly;GO:0000423//mitophagy;GO:0001932//regulation of protein phosphorylation;GO:0001933//negative regulation of protein phosphorylation;GO:0001934//positive regulation of protein phosphorylation;GO:0006914//autophagy;GO:0008333//endosome to lysosome transport;GO:0009267//cellular response to starvation;GO:0010608//posttranscriptional regulation of gene expression;GO:…
MergePeak_2765	12	88011896	88012418	0.00959	0.126	72	37	43	25	38	27	2.520000	2.220000	4.120000	1.130000	1.480000	1.550000	2.950000	1.390000	-1.085630	Intron (ENSBGRT00000019118/ENSBGRG00000010280, intron 1 of 6)	87923755	88018638	94884	-	ENSBGRG00000010280	ENSBGRT00000019118	87923755	88018638	94884	-	ENSBGRG00000010280	ENSBGRT00000019118	6481	SLX4IP	XP_005886964.1 PREDICTED: protein SLX4IP [Bos mutus]	-	-	-	-	-	-	-
MergePeak_10544	27	17883591	17887735	0.0096	0.126	132131	176686	149701	39827	49384	88904	581.430000	1334.570000	1807.550000	226.420000	242.390000	642.950000	1241.180000	370.590000	-1.743816	Intron (ENSBGRT00000047762/ENSBGRG00000025837, intron 1 of 1)	17884676	17887546	2871	+	ENSBGRG00000025837	ENSBGRT00000047762	17884676	17887546	2871	+	ENSBGRG00000025837	ENSBGRT00000047762	987	MT-ND6	AOT99192.1 NADH dehydrogenase subunit 6 [Bison bison bison]	Metabolism;Human Diseases;Human Diseases;Organismal Systems;Metabolism;Human Diseases;Organismal Systems	Global and overview maps;Neurodegenerative diseases;Neurodegenerative diseases;Environmental adaptation;Energy metabolism;Neurodegenerative diseases;Nervous system	ko01100//Metabolic pathways;ko05010//Alzheimer disease;ko05016//Huntington disease;ko04714//Thermogenesis;ko00190//Oxidative phosphorylation;ko05012//Parkinson disease;ko04723//Retrograde endocannabinoid signaling	K03884;K03884;K03884;K03884;K03884;K03884;K03884	-	GO:0008137//NADH dehydrogenase (ubiquinone) activity	GO:0055114//oxidation-reduction process
MergePeak_10394	26	47385971	47386910	0.00974	0.126	142	73	97	93	42	56	2.760000	2.430000	5.170000	2.330000	0.910000	1.790000	3.450000	1.680000	-1.038135	Intron (ENSBGRT00000022306/ENSBGRG00000012198, intron 1 of 4)	47361325	47386966	25642	-	ENSBGRG00000012198	ENSBGRT00000022306	47361325	47386966	25642	-	ENSBGRG00000012198	ENSBGRT00000022306	526	RAB40C	RAB40C, member RAS oncogene family [Source:HGNC Symbol;Acc:HGNC:18285]	-	-	-	-	-	GO:0003924//GTPase activity;GO:0005525//GTP binding	GO:0035556//intracellular signal transduction
MergePeak_16326	9	28163554	28164072	0.00974	0.126	58	41	53	37	34	22	2.040000	2.480000	5.120000	1.680000	1.340000	1.270000	3.210000	1.430000	-1.166558	Promoter (<=1kb)	28083276	28163125	79850	-	ENSBGRG00000006169	ENSBGRT00000011457	28083276	28163125	79850	-	ENSBGRG00000006169	ENSBGRT00000011457	-688	HK2	hexokinase 2 [Source:HGNC Symbol;Acc:HGNC:4923]	Metabolism;Human Diseases;Organismal Systems;Metabolism;Environmental Information Processing;Metabolism;Human Diseases;Metabolism;Human Diseases;Organismal Systems;Metabolism;Metabolism;Metabolism;Metabolism	Global and overview maps;Infectious diseases;Endocrine system;Global and overview maps;Signal transduction;Carbohydrate metabolism;Cancers;Carbohydrate metabolism;Endocrine and metabolic diseases;Digestive system;Carbohydrate metabolism;Carbohydrate metabolism;Carbohydrate metabolism;Biosynthesis of other secondary metabolites	ko01100//Metabolic pathways;ko05131//Shigellosis;ko04910//Insulin signaling pathway;ko01200//Carbon metabolism;ko04066//HIF-1 signaling pathway;ko00010//Glycolysis / Gluconeogenesis;ko05230//Central carbon metabolism in cancer;ko00520//Amino sugar and nucleotide sugar metabolism;ko04930//Type II diabetes mellitus;ko04973//Carbohydrate digestion and absorption;ko00051//Fructose and mannose metabol…	K00844;K00844;K00844;K00844;K00844;K00844;K00844;K00844;K00844;K00844;K00844;K00844;K00844;K00844	GO:0005741//mitochondrial outer membrane	GO:0004340//glucokinase activity;GO:0004396//hexokinase activity;GO:0005524//ATP binding;GO:0005536//glucose binding;GO:0016773//phosphotransferase activity, alcohol group as acceptor	GO:0001678//cellular glucose homeostasis;GO:0005975//carbohydrate metabolic process;GO:0006006//glucose metabolic process;GO:0006096//glycolytic process;GO:0008637//apoptotic mitochondrial changes;GO:0035795//negative regulation of mitochondrial membrane permeability;GO:0045766//positive regulation of angiogenesis;GO:0046324//regulation of glucose import;GO:0046835//carbohydrate phosphorylation;G…
MergePeak_15364	8	16100000	16100453	0.00975	0.126	77	52	54	42	24	39	3.100000	3.590000	5.960000	2.180000	1.080000	2.580000	4.220000	1.950000	-1.113769	Intron (ENSBGRT00000020754/ENSBGRG00000010747, intron 43 of 49)	16095824	16154129	58306	-	ENSBGRG00000010747	ENSBGRT00000020754	16095824	16154129	58306	-	ENSBGRG00000010747	ENSBGRT00000020754	53903	DOCK6	dedicator of cytokinesis 6 [Source:HGNC Symbol;Acc:HGNC:19189]	-	-	-	-	GO:0005829//cytosol	GO:0005085//guanyl-nucleotide exchange factor activity	GO:0007264//small GTPase mediated signal transduction
MergePeak_4559	16	44683462	44684026	0.00981	0.126	83	28	41	34	28	22	2.680000	1.550000	3.640000	1.420000	1.010000	1.170000	2.620000	1.200000	-1.126532	Intron (ENSBGRT00000007836/ENSBGRG00000004231, intron 4 of 10)	44653737	44693869	40133	-	ENSBGRG00000004231	ENSBGRT00000007836	44653737	44693869	40133	-	ENSBGRG00000004231	ENSBGRT00000007836	10125	TMEM144	transmembrane protein 144 [Source:HGNC Symbol;Acc:HGNC:25633]	-	-	-	-	GO:0016021//integral component of membrane	GO:0015144//carbohydrate transmembrane transporter activity	GO:0034219//carbohydrate transmembrane transport
MergePeak_4349	15	72529768	72530332	0.00982	0.126	68	38	66	29	24	41	2.200000	2.110000	5.860000	1.210000	0.870000	2.180000	3.390000	1.420000	-1.255394	Intron (ENSBGRT00000010653/ENSBGRG00000005506, intron 37 of 44)	72170549	72598352	427804	+	ENSBGRG00000005506	ENSBGRT00000010653	72170549	72598352	427804	+	ENSBGRG00000005506	ENSBGRT00000010653	359501	VWA8	von Willebrand factor A domain containing 8 [Source:HGNC Symbol;Acc:HGNC:29071]	-	-	-	-	GO:0005739//mitochondrion	GO:0005524//ATP binding;GO:0016887//ATPase activity	-
MergePeak_8459	22	1841305	1841962	0.00986	0.126	80	28	43	24	37	24	2.220000	1.330000	3.270000	0.860000	1.150000	1.090000	2.270000	1.030000	-1.140048	Downstream (<1kb)	1842368	1857780	15413	-	ENSBGRG00000013212	ENSBGRT00000024384	1831467	1832690	1224	+	ENSBGRG00000013189	ENSBGRT00000024096	10166	HMCES	5-hydroxymethylcytosine binding, ES cell specific [Source:HGNC Symbol;Acc:HGNC:24446]	-	-	-	-	GO:0005657//replication fork	GO:0003697//single-stranded DNA binding	GO:0006974//cellular response to DNA damage stimulus;GO:0018142//protein-DNA covalent cross-linking;GO:0045830//positive regulation of isotype switching;GO:0097681//double-strand break repair via alternative nonhomologous end joining
MergePeak_9187	24	3240938	3241348	0.00992	0.126	85	37	45	37	24	32	3.780000	2.820000	5.490000	2.130000	1.190000	2.340000	4.030000	1.890000	-1.092394	Intron (ENSBGRT00000029330/ENSBGRG00000015917, intron 1 of 2)	3153248	3279765	126518	-	ENSBGRG00000015917	ENSBGRT00000029330	3153248	3279765	126518	-	ENSBGRG00000015917	ENSBGRT00000029330	38622	H1-3	XP_017894027.1 PREDICTED: histone H1.3 [Capra hircus]	-	-	-	-	GO:0000786//nucleosome;GO:0005634//nucleus	GO:0003677//DNA binding	GO:0006334//nucleosome assembly
MergePeak_3825	14	71136632	71137235	0.00998	0.127	88	39	38	29	27	35	2.660000	2.020000	3.150000	1.130000	0.910000	1.740000	2.610000	1.260000	-1.050626	5' UTR	71105918	71137069	31152	-	ENSBGRG00000020614	ENSBGRT00000037933	71105918	71137069	31152	-	ENSBGRG00000020614	ENSBGRT00000037933	136	FLVCR1	feline leukemia virus subgroup C cellular receptor 1 [Source:HGNC Symbol;Acc:HGNC:24682]	-	-	-	-	GO:0005739//mitochondrion	GO:0015232//heme transporter activity	GO:0001568//blood vessel development;GO:0001701//in utero embryonic development;GO:0006839//mitochondrial transport;GO:0015886//heme transport;GO:0030218//erythrocyte differentiation;GO:0035108//limb morphogenesis;GO:0035264//multicellular organism growth;GO:0042733//embryonic digit morphogenesis;GO:0046620//regulation of organ growth;GO:0048536//spleen development;GO:0048704//embryonic skeletal …
MergePeak_863	1	163378019	163378719	0.00999	0.127	92	46	44	52	30	24	2.400000	2.060000	3.150000	1.750000	0.870000	1.030000	2.540000	1.220000	-1.057947	Downstream (<1kb)	163378385	163380127	1743	-	ENSBGRG00000003325	ENSBGRT00000006192	163378385	163380127	1743	-	ENSBGRG00000003325	ENSBGRT00000006192	1758	-	-	-	-	-	-	-	-	-
MergePeak_16098	9	8460137	8460679	0.0101	0.127	86	46	48	44	35	31	2.890000	2.660000	4.430000	1.910000	1.310000	1.710000	3.330000	1.640000	-1.021826	Intron (ENSBGRT00000033474/ENSBGRG00000017696, intron 10 of 10)	8399842	8482264	82423	+	ENSBGRG00000017696	ENSBGRT00000033474	8399842	8482264	82423	+	ENSBGRG00000017696	ENSBGRT00000033474	60566	PTPA	protein phosphatase 2 phosphatase activator [Source:HGNC Symbol;Acc:HGNC:9308]	Human Diseases	Endocrine and metabolic diseases	ko04931//Insulin resistance	K17605	GO:0000159//protein phosphatase type 2A complex;GO:0005634//nucleus;GO:0005654//nucleoplasm;GO:0005737//cytoplasm;GO:0034704//calcium channel complex	GO:0005102//signaling receptor binding;GO:0005524//ATP binding;GO:0008160//protein tyrosine phosphatase activator activity;GO:0016887//ATPase activity;GO:0019211//phosphatase activator activity;GO:0019888//protein phosphatase regulator activity;GO:0042803//protein homodimerization activity;GO:0051721//protein phosphatase 2A binding	GO:0032515//negative regulation of phosphoprotein phosphatase activity;GO:0032516//positive regulation of phosphoprotein phosphatase activity;GO:0035307//positive regulation of protein dephosphorylation;GO:0035308//negative regulation of protein dephosphorylation;GO:0043065//positive regulation of apoptotic process;GO:0043666//regulation of phosphoprotein phosphatase activity
MergePeak_9022	23	41345233	41345973	0.0101	0.127	116	74	70	69	34	53	2.860000	3.130000	4.730000	2.200000	0.930000	2.150000	3.570000	1.760000	-1.020349	Promoter (<=1kb)	41269877	41345540	75664	-	ENSBGRG00000008494	ENSBGRT00000015490	41270332	41345540	75209	-	ENSBGRG00000008494	ENSBGRT00000015841	-63	MTMR12	myotubularin related protein 12 [Source:HGNC Symbol;Acc:HGNC:18191]	-	-	-	-	GO:0005737//cytoplasm	GO:0019208//phosphatase regulator activity	GO:1901998//toxin transport
MergePeak_2461	12	39624623	39625312	0.0101	0.127	118	67	65	50	38	60	3.120000	3.040000	4.720000	1.710000	1.120000	2.610000	3.630000	1.810000	-1.003980	Promoter (<=1kb)	39625304	39681803	56500	+	ENSBGRG00000006231	ENSBGRT00000011473	39625304	39681803	56500	+	ENSBGRG00000006231	ENSBGRT00000011473	-337	CDS2	CDP-diacylglycerol synthase 2 [Source:HGNC Symbol;Acc:HGNC:1801]	Metabolism;Metabolism;Environmental Information Processing	Global and overview maps;Lipid metabolism;Signal transduction	ko01100//Metabolic pathways;ko00564//Glycerophospholipid metabolism;ko04070//Phosphatidylinositol signaling system	K00981;K00981;K00981	GO:0005783//endoplasmic reticulum;GO:0016020//membrane	GO:0004605//phosphatidate cytidylyltransferase activity;GO:0016772//transferase activity, transferring phosphorus-containing groups	GO:0016024//CDP-diacylglycerol biosynthetic process;GO:0140042//lipid droplet formation
MergePeak_3394	14	13185732	13186285	0.0101	0.127	95	37	37	44	26	23	3.130000	2.090000	3.350000	1.870000	0.960000	1.250000	2.860000	1.360000	-1.072408	Intron (ENSBGRT00000009033/ENSBGRG00000004859, intron 66 of 73)	13120269	14134801	1014533	-	ENSBGRG00000004859	ENSBGRT00000009033	13120269	14134801	1014533	-	ENSBGRG00000004859	ENSBGRT00000009033	948793	USH2A	usherin [Source:HGNC Symbol;Acc:HGNC:12601]	-	-	-	-	GO:0001917//photoreceptor inner segment;GO:0002141//stereocilia ankle link;GO:0002142//stereocilia ankle link complex;GO:0005604//basement membrane;GO:0005737//cytoplasm;GO:0016324//apical plasma membrane;GO:0032391//photoreceptor connecting cilium;GO:0032421//stereocilium bundle;GO:0036064//ciliary basal body;GO:0060171//stereocilium membrane;GO:1990075//periciliary membrane compartment;GO:19906…	GO:0005515//protein binding;GO:0005518//collagen binding;GO:0017022//myosin binding;GO:0042802//identical protein binding	GO:0007605//sensory perception of sound;GO:0035315//hair cell differentiation;GO:0045184//establishment of protein localization;GO:0045494//photoreceptor cell maintenance;GO:0048496//maintenance of animal organ identity;GO:0050953//sensory perception of light stimulus;GO:0060113//inner ear receptor cell differentiation
MergePeak_609	1	121727944	121728795	0.0102	0.128	114	69	101	85	43	50	2.440000	2.540000	5.940000	2.350000	1.030000	1.760000	3.640000	1.710000	-1.089942	Promoter (<=1kb)	121626326	121728127	101802	-	ENSBGRG00000007144	ENSBGRT00000013113	121646930	121728127	81198	-	ENSBGRG00000007144	ENSBGRT00000013499	-242	GMPS	guanine monophosphate synthase [Source:HGNC Symbol;Acc:HGNC:4378]	Metabolism;Metabolism;Metabolism	Global and overview maps;Nucleotide metabolism;Xenobiotics biodegradation and metabolism	ko01100//Metabolic pathways;ko00230//Purine metabolism;ko00983//Drug metabolism - other enzymes	K01951;K01951;K01951	GO:0005829//cytosol	GO:0003921//GMP synthase activity;GO:0003922//GMP synthase (glutamine-hydrolyzing) activity;GO:0005524//ATP binding;GO:0016462//pyrophosphatase activity	GO:0006164//purine nucleotide biosynthetic process;GO:0006177//GMP biosynthetic process
MergePeak_940	10	5843331	5843870	0.0104	0.128	81	62	56	31	29	52	2.740000	3.600000	5.200000	1.350000	1.090000	2.890000	3.850000	1.780000	-1.112981	Intron (ENSBGRT00000039538/ENSBGRG00000020833, intron 1 of 75)	5296910	5890662	593753	-	ENSBGRG00000020833	ENSBGRT00000039538	5296910	5890662	593753	-	ENSBGRG00000020833	ENSBGRT00000039538	47062	UTRN	utrophin [Source:HGNC Symbol;Acc:HGNC:12635]	-	-	-	-	GO:0005654//nucleoplasm;GO:0005737//cytoplasm;GO:0005886//plasma membrane;GO:0016010//dystrophin-associated glycoprotein complex;GO:0030175//filopodium;GO:0031527//filopodium membrane;GO:0031594//neuromuscular junction;GO:0032991//protein-containing complex;GO:0042383//sarcolemma;GO:0045202//synapse;GO:0070938//contractile ring	GO:0003779//actin binding;GO:0005178//integrin binding;GO:0005515//protein binding;GO:0008270//zinc ion binding;GO:0017166//vinculin binding;GO:0019901//protein kinase binding	GO:0001954//positive regulation of cell-matrix adhesion
MergePeak_6235	19	30774235	30774994	0.0104	0.128	62	61	35	35	35	27	1.490000	2.520000	2.310000	1.090000	0.940000	1.070000	2.110000	1.030000	-1.034599	Intron (ENSBGRT00000013428/ENSBGRG00000007324, intron 1 of 14)	30774493	30784610	10118	+	ENSBGRG00000007324	ENSBGRT00000013428	30774493	30784610	10118	+	ENSBGRG00000007324	ENSBGRT00000013428	121	SPATA20	spermatogenesis associated 20 [Source:HGNC Symbol;Acc:HGNC:26125]	-	-	-	-	-	GO:0003824//catalytic activity	-
MergePeak_7098	2	62865171	62865617	0.0105	0.128	65	46	43	38	15	30	2.660000	3.230000	4.820000	2.010000	0.680000	2.020000	3.570000	1.570000	-1.185160	Promoter (<=1kb)	62771656	62865102	93447	-	ENSBGRG00000001930	ENSBGRT00000003791	62808892	62865102	56211	-	ENSBGRG00000001930	ENSBGRT00000003842	-292	GLS	glutaminase [Source:HGNC Symbol;Acc:HGNC:4331]	Metabolism;Human Diseases;Organismal Systems;Organismal Systems;Human Diseases;Metabolism;Organismal Systems;Metabolism;Metabolism	Global and overview maps;Cancers;Nervous system;Nervous system;Cancers;Amino acid metabolism;Excretory system;Amino acid metabolism;Metabolism of other amino acids	ko01100//Metabolic pathways;ko05206//MicroRNAs in cancer;ko04724//Glutamatergic synapse;ko04727//GABAergic synapse;ko05230//Central carbon metabolism in cancer;ko00250//Alanine, aspartate and glutamate metabolism;ko04964//Proximal tubule bicarbonate reclamation;ko00220//Arginine biosynthesis;ko00471//D-Glutamine and D-glutamate metabolism	K01425;K01425;K01425;K01425;K01425;K01425;K01425;K01425;K01425	GO:0005739//mitochondrion	GO:0004359//glutaminase activity;GO:0005515//protein binding	GO:0006537//glutamate biosynthetic process;GO:0006541//glutamine metabolic process;GO:0006543//glutamine catabolic process;GO:0051289//protein homotetramerization;GO:0090461//glutamate homeostasis
MergePeak_14809	7	52609911	52610470	0.0106	0.128	95	73	82	62	49	52	3.100000	4.090000	7.340000	2.610000	1.780000	2.790000	4.840000	2.390000	-1.017996	Intron (ENSBGRT00000036826/ENSBGRG00000019890, intron 1 of 14)	52566793	52617809	51017	-	ENSBGRG00000019890	ENSBGRT00000036826	52566793	52617809	51017	-	ENSBGRG00000019890	ENSBGRT00000036826	7619	ANKS6	ankyrin repeat and sterile alpha motif domain containing 6 [Source:HGNC Symbol;Acc:HGNC:26724]	-	-	-	-	-	GO:0005515//protein binding	-
MergePeak_7983	20	62370445	62370922	0.0106	0.128	75	51	57	47	31	34	2.870000	3.350000	5.980000	2.320000	1.320000	2.140000	4.070000	1.930000	-1.076428	5' UTR	62363941	62370820	6880	-	ENSBGRG00000021008	ENSBGRT00000038799	62363941	62370820	6880	-	ENSBGRG00000021008	ENSBGRT00000038734	137	QPCTL	glutaminyl-peptide cyclotransferase like [Source:HGNC Symbol;Acc:HGNC:25952]	-	-	-	-	GO:0005794//Golgi apparatus	GO:0008270//zinc ion binding;GO:0016603//glutaminyl-peptide cyclotransferase activity	GO:0017186//peptidyl-pyroglutamic acid biosynthetic process, using glutaminyl-peptide cyclotransferase
MergePeak_6299	19	36539359	36539945	0.0107	0.128	69	32	45	40	28	16	2.150000	1.710000	3.840000	1.610000	0.970000	0.820000	2.570000	1.130000	-1.185446	Intron (ENSBGRT00000032841/ENSBGRG00000017919, intron 1 of 1)	36472400	36545955	73556	-	ENSBGRG00000017919	ENSBGRT00000032841	36472400	36545955	73556	-	ENSBGRG00000017919	ENSBGRT00000032841	6303	-	-	-	-	-	-	-	-	-
MergePeak_3739	14	59382718	59383337	0.0108	0.128	73	29	58	24	33	33	2.150000	1.470000	4.690000	0.910000	1.080000	1.600000	2.770000	1.200000	-1.206852	Intron (ENSBGRT00000014259/ENSBGRG00000007367, intron 3 of 16)	59362170	59489670	127501	+	ENSBGRG00000007367	ENSBGRT00000014259	59362170	59489670	127501	+	ENSBGRG00000007367	ENSBGRT00000014259	20857	RALGPS2	Ral GEF with PH domain and SH3 binding motif 2 [Source:HGNC Symbol;Acc:HGNC:30279]	-	-	-	-	-	GO:0005085//guanyl-nucleotide exchange factor activity	GO:0007264//small GTPase mediated signal transduction;GO:0032485//regulation of Ral protein signal transduction
MergePeak_11740	3	53328208	53328772	0.0108	0.128	81	33	53	25	52	22	2.620000	1.830000	4.700000	1.040000	1.880000	1.170000	3.050000	1.360000	-1.165203	Intron (ENSBGRT00000000413/ENSBGRG00000000245, intron 20 of 22)	53321124	53409312	88189	-	ENSBGRG00000000245	ENSBGRT00000000413	53321124	53409312	88189	-	ENSBGRG00000000245	ENSBGRT00000000413	80822	ABCD3	ATP binding cassette subfamily D member 3 [Source:HGNC Symbol;Acc:HGNC:67]	Cellular Processes;Environmental Information Processing	Transport and catabolism;Membrane transport	ko04146//Peroxisome;ko02010//ABC transporters	K05677;K05677	GO:0005777//peroxisome;GO:0005778//peroxisomal membrane;GO:0005782//peroxisomal matrix;GO:0016021//integral component of membrane;GO:0043231//intracellular membrane-bounded organelle	GO:0005324//long-chain fatty acid transporter activity;GO:0005524//ATP binding;GO:0016887//ATPase activity;GO:0042626//ATPase activity, coupled to transmembrane movement of substances;GO:0042803//protein homodimerization activity	GO:0006633//fatty acid biosynthetic process;GO:0006635//fatty acid beta-oxidation;GO:0007031//peroxisome organization;GO:0015910//peroxisomal long-chain fatty acid import;GO:0042760//very long-chain fatty acid catabolic process;GO:0055085//transmembrane transport
MergePeak_5953	19	9898011	9898489	0.0108	0.128	56	50	43	49	16	16	2.140000	3.270000	4.500000	2.420000	0.680000	1.000000	3.300000	1.370000	-1.268290	Promoter (<=1kb)	9897992	9898207	216	-	ENSBGRG00000012809	ENSBGRT00000023425	9897992	9898207	216	-	ENSBGRG00000012809	ENSBGRT00000023425	-43	--	ACJ07002.1 hypothetical protein [Bos taurus]	-	-	-	-	-	-	-
MergePeak_2584	12	57335562	57336054	0.0108	0.128	73	48	61	42	47	28	2.710000	3.050000	6.200000	2.010000	1.940000	1.710000	3.990000	1.890000	-1.078003	Promoter (<=1kb)	57318288	57335651	17364	-	ENSBGRG00000006426	ENSBGRT00000011854	57318512	57335651	17140	-	ENSBGRG00000006426	ENSBGRT00000011889	-157	PXMP4	XP_005688528.3 PREDICTED: peroxisomal membrane protein 4 [Capra hircus]	Cellular Processes	Transport and catabolism	ko04146//Peroxisome	K13350	-	-	-
MergePeak_13206	5	48624330	48624786	0.0109	0.128	110	56	62	66	40	35	4.400000	3.840000	6.800000	3.410000	1.780000	2.300000	5.010000	2.500000	-1.002883	Promoter (<=1kb)	48607802	48624405	16604	-	ENSBGRG00000004148	ENSBGRT00000007730	48607802	48624405	16604	-	ENSBGRG00000004148	ENSBGRT00000007781	-153	NEMP1	nuclear envelope integral membrane protein 1 [Source:HGNC Symbol;Acc:HGNC:29001]	-	-	-	-	GO:0005635//nuclear envelope	-	-
MergePeak_906	1	171995613	171996279	0.0109	0.128	99	58	72	64	42	39	2.710000	2.730000	5.410000	2.260000	1.280000	1.750000	3.620000	1.760000	-1.040414	Promoter (<=1kb)	171996226	172032562	36337	+	ENSBGRG00000001791	ENSBGRT00000003323	171996226	172032562	36337	+	ENSBGRG00000001791	ENSBGRT00000003323	-280	RAB5A	RAB5A, member RAS oncogene family [Source:HGNC Symbol;Acc:HGNC:9783]	Environmental Information Processing;Cellular Processes;Human Diseases;Human Diseases;Cellular Processes;Human Diseases;Human Diseases;Organismal Systems	Signal transduction;Transport and catabolism;Infectious diseases;Infectious diseases;Transport and catabolism;Infectious diseases;Neurodegenerative diseases;Excretory system	ko04014//Ras signaling pathway;ko04144//Endocytosis;ko05132//Salmonella infection;ko05152//Tuberculosis;ko04145//Phagosome;ko05146//Amoebiasis;ko05014//Amyotrophic lateral sclerosis (ALS);ko04962//Vasopressin-regulated water reabsorption	K07887;K07887;K07887;K07887;K07887;K07887;K07887;K07887	GO:0005737//cytoplasm;GO:0005769//early endosome;GO:0005829//cytosol;GO:0010008//endosome membrane;GO:0036477//somatodendritic compartment;GO:0043195//terminal bouton;GO:0098559//cytoplasmic side of early endosome membrane	GO:0003924//GTPase activity;GO:0005525//GTP binding;GO:0019003//GDP binding	GO:0006897//endocytosis;GO:0036465//synaptic vesicle recycling;GO:0039694//viral RNA genome replication;GO:0045022//early endosome to late endosome transport;GO:0045921//positive regulation of exocytosis;GO:0051036//regulation of endosome size;GO:0051489//regulation of filopodium assembly;GO:0150093//amyloid-beta clearance by transcytosis;GO:2000286//receptor internalization involved in canonical…
MergePeak_3068	13	42363354	42363811	0.0109	0.128	85	34	43	36	36	24	3.390000	2.330000	4.710000	1.860000	1.600000	1.570000	3.480000	1.680000	-1.050626	Intron (ENSBGRT00000018170/ENSBGRG00000009763, intron 6 of 20)	42334542	42388468	53927	-	ENSBGRG00000009763	ENSBGRT00000018170	42334542	42388468	53927	-	ENSBGRG00000009763	ENSBGRT00000018170	24886	DENND5A	DENN domain containing 5A [Source:HGNC Symbol;Acc:HGNC:19344]	-	-	-	-	GO:0005794//Golgi apparatus;GO:0005802//trans-Golgi network;GO:0030904//retromer complex	GO:0005515//protein binding;GO:0017112//Rab guanyl-nucleotide exchange factor activity;GO:0017137//Rab GTPase binding	GO:0042147//retrograde transport, endosome to Golgi
MergePeak_14704	7	38056528	38057234	0.011	0.128	116	38	53	47	45	31	3.000000	1.680000	3.760000	1.570000	1.300000	1.320000	2.810000	1.400000	-1.005143	Intron (ENSBGRT00000005877/ENSBGRG00000002989, intron 1 of 48)	37862199	38084511	222313	-	ENSBGRG00000002989	ENSBGRT00000005877	37862199	38084511	222313	-	ENSBGRG00000002989	ENSBGRT00000005877	27630	SVEP1	sushi, von Willebrand factor type A, EGF and pentraxin domain containing 1 [Source:HGNC Symbol;Acc:HGNC:15985]	-	-	-	-	GO:0005615//extracellular space;GO:0005634//nucleus;GO:0005737//cytoplasm	GO:0003682//chromatin binding;GO:0005509//calcium ion binding	GO:0001945//lymph vessel development;GO:0003017//lymph circulation;GO:0008544//epidermis development;GO:0010467//gene expression;GO:0036303//lymph vessel morphogenesis;GO:0048014//Tie signaling pathway;GO:0120193//tight junction organization
MergePeak_11394	3	5037352	5038104	0.011	0.128	88	47	74	42	47	42	2.130000	1.960000	4.920000	1.320000	1.270000	1.670000	3.000000	1.420000	-1.079072	Promoter (<=1kb)	5038452	5154567	116116	+	ENSBGRG00000009308	ENSBGRT00000017145	5038452	5154385	115934	+	ENSBGRG00000009308	ENSBGRT00000017450	-724	KIRREL1	kirre like nephrin family adhesion molecule 1 [Source:HGNC Symbol;Acc:HGNC:15734]	-	-	-	-	GO:0005886//plasma membrane;GO:0005911//cell-cell junction;GO:0048471//perinuclear region of cytoplasm	GO:0017022//myosin binding	-
MergePeak_15141	7	118035496	118036172	0.011	0.128	115	58	65	45	34	58	3.100000	2.690000	4.810000	1.570000	1.020000	2.570000	3.530000	1.720000	-1.037260	Intron (ENSBGRT00000022765/ENSBGRG00000012232, intron 6 of 11)	118021777	118104931	83155	-	ENSBGRG00000012232	ENSBGRT00000022765	118021777	118104931	83155	-	ENSBGRG00000012232	ENSBGRT00000022765	69097	GALNT7	polypeptide N-acetylgalactosaminyltransferase 7 [Source:HGNC Symbol;Acc:HGNC:4129]	Metabolism;Metabolism;Metabolism	Global and overview maps;Glycan biosynthesis and metabolism;Glycan biosynthesis and metabolism	ko01100//Metabolic pathways;ko00514//Other types of O-glycan biosynthesis;ko00512//Mucin type O-glycan biosynthesis	K00710;K00710;K00710	-	GO:0004653//polypeptide N-acetylgalactosaminyltransferase activity	GO:0006493//protein O-linked glycosylation
MergePeak_9536	24	45071353	45071971	0.0111	0.128	73	35	50	34	29	30	2.150000	1.770000	4.050000	1.300000	0.950000	1.450000	2.660000	1.230000	-1.112768	Promoter (<=1kb)	45072126	45182520	110395	+	ENSBGRG00000010332	ENSBGRT00000019281	45072126	45182520	110395	+	ENSBGRG00000010332	ENSBGRT00000019281	-464	DTNBP1	dystrobrevin binding protein 1 [Source:HGNC Symbol;Acc:HGNC:17328]	-	-	-	-	GO:0005634//nucleus;GO:0005737//cytoplasm;GO:0005789//endoplasmic reticulum membrane;GO:0005886//plasma membrane;GO:0014069//postsynaptic density;GO:0015630//microtubule cytoskeleton;GO:0016528//sarcoplasm;GO:0030424//axon;GO:0030426//growth cone;GO:0030496//midbody;GO:0030672//synaptic vesicle membrane;GO:0031083//BLOC-1 complex;GO:0032279//asymmetric synapse;GO:0042383//sarcolemma;GO:0043005//n…	-	GO:0001956//positive regulation of neurotransmitter secretion;GO:0006996//organelle organization;GO:0007596//blood coagulation;GO:0008089//anterograde axonal transport;GO:0010628//positive regulation of gene expression;GO:0014059//regulation of dopamine secretion;GO:0031175//neuron projection development;GO:0031532//actin cytoskeleton reorganization;GO:0032091//negative regulation of protein bind…
MergePeak_13946	6	32750148	32750764	0.0112	0.128	109	38	49	40	34	38	3.230000	1.930000	3.980000	1.530000	1.120000	1.850000	3.050000	1.500000	-1.023847	Promoter (<=1kb)	32596397	32750222	153826	-	ENSBGRG00000020957	ENSBGRT00000039018	32596397	32750222	153826	-	ENSBGRG00000020957	ENSBGRT00000039018	-234	ALB	albumin [Source:HGNC Symbol;Acc:HGNC:399]	Organismal Systems	Endocrine system	ko04918//Thyroid hormone synthesis	K16141	GO:0005576//extracellular region;GO:0005615//extracellular space;GO:0005737//cytoplasm;GO:0005783//endoplasmic reticulum;GO:0005794//Golgi apparatus;GO:0032991//protein-containing complex;GO:0070062//extracellular exosome	GO:0003677//DNA binding;GO:0005504//fatty acid binding;GO:0008144//drug binding;GO:0015643//toxic substance binding;GO:0019825//oxygen binding;GO:0030170//pyridoxal phosphate binding;GO:0042802//identical protein binding;GO:0051087//chaperone binding;GO:1903981//enterobactin binding	GO:0009267//cellular response to starvation;GO:0043066//negative regulation of apoptotic process;GO:0051659//maintenance of mitochondrion location
MergePeak_12530	4	49409820	49410395	0.0112	0.128	104	69	63	74	40	34	3.300000	3.760000	5.480000	3.030000	1.410000	1.770000	4.180000	2.070000	-1.013872	Intron (ENSBGRT00000037202/ENSBGRG00000020206, intron 15 of 28)	49356511	49520525	164015	-	ENSBGRG00000020206	ENSBGRT00000037202	49356511	49520525	164015	-	ENSBGRG00000020206	ENSBGRT00000037202	110418	TNS3	tensin 3 [Source:HGNC Symbol;Acc:HGNC:21616]	-	-	-	-	GO:0005829//cytosol;GO:0005925//focal adhesion	GO:0005515//protein binding	GO:0008284//positive regulation of cell proliferation;GO:0016477//cell migration;GO:0048286//lung alveolus development
MergePeak_15208	8	4074665	4075271	0.0112	0.128	124	42	60	48	33	46	3.730000	2.170000	4.950000	1.870000	1.110000	2.270000	3.620000	1.750000	-1.048635	Promoter (<=1kb)	4075614	4081027	5414	+	ENSBGRG00000024682	ENSBGRT00000045554	4075614	4081027	5414	+	ENSBGRG00000024682	ENSBGRT00000045554	-646	BABAM1	BRISC and BRCA1 A complex member 1 [Source:HGNC Symbol;Acc:HGNC:25008]	Genetic Information Processing	Replication and repair	ko03440//Homologous recombination	K20776	GO:0005634//nucleus;GO:0005654//nucleoplasm;GO:0005737//cytoplasm;GO:0005829//cytosol;GO:0016604//nuclear body;GO:0070531//BRCA1-A complex;GO:0070552//BRISC complex	-	GO:0006302//double-strand break repair;GO:0010212//response to ionizing radiation;GO:0045739//positive regulation of DNA repair;GO:0070536//protein K63-linked deubiquitination;GO:0071425//hematopoietic stem cell proliferation;GO:0072425//signal transduction involved in G2 DNA damage checkpoint
MergePeak_3502	14	28537840	28538409	0.0112	0.128	83	50	67	23	35	53	2.660000	2.750000	5.890000	0.950000	1.250000	2.790000	3.770000	1.660000	-1.183381	Promoter (<=1kb)	28538321	28573310	34990	+	ENSBGRG00000009393	ENSBGRT00000017232	28538321	28573191	34871	+	ENSBGRG00000009393	ENSBGRT00000017327	-197	ADSS2	adenylosuccinate synthase 2 [Source:HGNC Symbol;Acc:HGNC:292]	Metabolism;Metabolism;Metabolism	Global and overview maps;Nucleotide metabolism;Amino acid metabolism	ko01100//Metabolic pathways;ko00230//Purine metabolism;ko00250//Alanine, aspartate and glutamate metabolism	K01939;K01939;K01939	GO:0005737//cytoplasm;GO:0005829//cytosol;GO:0005886//plasma membrane	GO:0004019//adenylosuccinate synthase activity;GO:0005525//GTP binding	GO:0006164//purine nucleotide biosynthetic process;GO:0006167//AMP biosynthetic process
MergePeak_4761	16	76459199	76460154	0.0113	0.128	92	69	55	31	40	56	1.760000	2.260000	2.880000	0.760000	0.850000	1.760000	2.300000	1.120000	-1.038135	Promoter (<=1kb)	76459866	76461800	1935	+	ENSBGRG00000022367	ENSBGRT00000041329	76459866	76461800	1935	+	ENSBGRG00000022367	ENSBGRT00000041329	-190	UQCR10	ubiquinol-cytochrome c reductase, complex III subunit X [Source:HGNC Symbol;Acc:HGNC:30863]	Metabolism;Human Diseases;Human Diseases;Organismal Systems;Human Diseases;Metabolism;Human Diseases;Organismal Systems	Global and overview maps;Neurodegenerative diseases;Neurodegenerative diseases;Environmental adaptation;Endocrine and metabolic diseases;Energy metabolism;Neurodegenerative diseases;Circulatory system	ko01100//Metabolic pathways;ko05010//Alzheimer disease;ko05016//Huntington disease;ko04714//Thermogenesis;ko04932//Non-alcoholic fatty liver disease (NAFLD);ko00190//Oxidative phosphorylation;ko05012//Parkinson disease;ko04260//Cardiac muscle contraction	K00419;K00419;K00419;K00419;K00419;K00419;K00419;K00419	GO:0005739//mitochondrion;GO:0005743//mitochondrial inner membrane;GO:0005750//mitochondrial respiratory chain complex III	-	GO:0006122//mitochondrial electron transport, ubiquinol to cytochrome c
MergePeak_13433	5	82139169	82139609	0.0114	0.128	96	33	43	27	39	32	3.980000	2.350000	4.890000	1.450000	1.800000	2.180000	3.740000	1.810000	-1.047049	Intron (ENSBGRT00000008840/ENSBGRG00000004717, intron 2 of 29)	82124130	82140287	16158	-	ENSBGRG00000004717	ENSBGRT00000008840	82124130	82140287	16158	-	ENSBGRG00000004717	ENSBGRT00000008840	898	ITGA5	integrin subunit alpha 5 [Source:HGNC Symbol;Acc:HGNC:6141]	Human Diseases;Environmental Information Processing;Human Diseases;Human Diseases;Cellular Processes;Human Diseases;Cellular Processes;Human Diseases;Cellular Processes;Human Diseases;Human Diseases;Organismal Systems;Human Diseases;Human Diseases;Human Diseases;Environmental Information Processing;Human Diseases	Infectious diseases;Signal transduction;Infectious diseases;Infectious diseases;Cell motility;Cancers;Cellular community - eukaryotes;Infectious disease: bacterial;Transport and catabolism;Cancers;Cardiovascular diseases;Immune system;Infectious diseases;Cardiovascular diseases;Cardiovascular diseases;Signaling molecules and interaction;Infectious diseases	ko05168//Herpes simplex infection;ko04151//PI3K-Akt signaling pathway;ko05165//Human papillomavirus infection;ko05131//Shigellosis;ko04810//Regulation of actin cytoskeleton;ko05205//Proteoglycans in cancer;ko04510//Focal adhesion;ko05135//Yersinia infection;ko04145//Phagosome;ko05206//MicroRNAs in cancer;ko05414//Dilated cardiomyopathy (DCM);ko04640//Hematopoietic cell lineage;ko05100//Bacterial …	K06484;K06484;K06484;K06484;K06484;K06484;K06484;K06484;K06484;K06484;K06484;K06484;K06484;K06484;K06484;K06484;K06484	GO:0005783//endoplasmic reticulum;GO:0005794//Golgi apparatus;GO:0005886//plasma membrane;GO:0005911//cell-cell junction;GO:0005925//focal adhesion;GO:0008305//integrin complex;GO:0009897//external side of plasma membrane;GO:0009986//cell surface;GO:0031410//cytoplasmic vesicle;GO:0032587//ruffle membrane;GO:0034674//integrin alpha5-beta1 complex;GO:0045202//synapse	GO:0005178//integrin binding	GO:0007044//cell-substrate junction assembly;GO:0007155//cell adhesion;GO:0007157//heterophilic cell-cell adhesion via plasma membrane cell adhesion molecules;GO:0007159//leukocyte cell-cell adhesion;GO:0007229//integrin-mediated signaling pathway;GO:0007613//memory;GO:0023035//CD40 signaling pathway;GO:0031589//cell-substrate adhesion;GO:0033627//cell adhesion mediated by integrin;GO:0033631//ce…
MergePeak_9866	25	36030746	36031226	0.0114	0.128	86	37	34	33	19	31	3.270000	2.410000	3.540000	1.620000	0.810000	1.940000	3.070000	1.460000	-1.072270	Intron (ENSBGRT00000035944/ENSBGRG00000019577, intron 8 of 8)	35621573	36037511	415939	+	ENSBGRG00000019577	ENSBGRT00000035944	35621573	36037511	415939	+	ENSBGRG00000019577	ENSBGRT00000035944	409413	VTI1A	vesicle transport through interaction with t-SNAREs 1A [Source:HGNC Symbol;Acc:HGNC:17792]	Genetic Information Processing	Folding, sorting and degradation	ko04130//SNARE interactions in vesicular transport	K08493	GO:0005776//autophagosome;GO:0005794//Golgi apparatus;GO:0016020//membrane;GO:0043231//intracellular membrane-bounded organelle	GO:0005484//SNAP receptor activity	GO:0006886//intracellular protein transport;GO:0006914//autophagy;GO:0016192//vesicle-mediated transport;GO:0042147//retrograde transport, endosome to Golgi;GO:0050882//voluntary musculoskeletal movement;GO:0090161//Golgi ribbon formation
MergePeak_17006	X	65178228	65179047	0.0114	0.128	84	49	71	43	39	44	1.870000	1.870000	4.340000	1.240000	0.970000	1.610000	2.690000	1.270000	-1.082778	Intron (ENSBGRT00000043556/ENSBGRG00000023530, intron 1 of 2)	65178434	65180987	2554	+	ENSBGRG00000023530	ENSBGRT00000043556	65178434	65180987	2554	+	ENSBGRG00000023530	ENSBGRT00000043556	203	ALG13	KAB1252865.1 putative bifunctional UDP-N-acetylglucosamine transferase and deubiquitinase ALG13 [Camelus dromedarius]	Metabolism;Metabolism;Metabolism	Global and overview maps;Glycan biosynthesis and metabolism;Glycan biosynthesis and metabolism	ko01100//Metabolic pathways;ko00510//N-Glycan biosynthesis;ko00513//Various types of N-glycan biosynthesis	K07432;K07432;K07432	-	GO:0016758//transferase activity, transferring hexosyl groups	GO:0006488//dolichol-linked oligosaccharide biosynthetic process
MergePeak_8552	22	11784992	11785437	0.0114	0.128	64	56	43	34	30	35	2.620000	3.940000	4.830000	1.800000	1.370000	2.360000	3.800000	1.840000	-1.046294	Intron (ENSBGRT00000040373/ENSBGRG00000021700, intron 35 of 38)	11758706	11787904	29199	+	ENSBGRG00000021700	ENSBGRT00000040373	11758706	11787904	29199	+	ENSBGRG00000021700	ENSBGRT00000040373	26508	RNF123	ring finger protein 123 [Source:HGNC Symbol;Acc:HGNC:21148]	-	-	-	-	GO:0005737//cytoplasm;GO:0005829//cytosol;GO:0031965//nuclear membrane	GO:0005515//protein binding	-
MergePeak_3210	13	59822360	59822947	0.0115	0.128	104	53	60	39	34	53	3.230000	2.830000	5.110000	1.570000	1.180000	2.710000	3.720000	1.820000	-1.031364	Downstream (2-3kb)	59824953	59841958	17006	-	ENSBGRG00000025333	ENSBGRT00000047063	59814314	59816663	2350	-	ENSBGRG00000025309	ENSBGRT00000046781	-5990	SIDT2	SID1 transmembrane family member 2 [Source:HGNC Symbol;Acc:HGNC:24272]	-	-	-	-	GO:0005764//lysosome;GO:0005765//lysosomal membrane;GO:0005886//plasma membrane;GO:0016021//integral component of membrane	GO:0003725//double-stranded RNA binding;GO:0035612//AP-2 adaptor complex binding;GO:0035650//AP-1 adaptor complex binding;GO:0051032//nucleic acid transmembrane transporter activity;GO:0051033//RNA transmembrane transporter activity	GO:0000902//cell morphogenesis;GO:0003323//type B pancreatic cell development;GO:0006401//RNA catabolic process;GO:0009749//response to glucose;GO:0033227//dsRNA transport;GO:0042593//glucose homeostasis;GO:0044342//type B pancreatic cell proliferation;GO:0050658//RNA transport;GO:0061178//regulation of insulin secretion involved in cellular response to glucose stimulus
MergePeak_15574	8	42452427	42453010	0.0118	0.128	61	46	45	38	39	19	1.910000	2.470000	3.860000	1.540000	1.360000	0.980000	2.750000	1.290000	-1.092061	Intron (ENSBGRT00000020495/ENSBGRG00000011184, intron 1 of 8)	42433582	42459219	25638	+	ENSBGRG00000011184	ENSBGRT00000020495	42433582	42459219	25638	+	ENSBGRG00000011184	ENSBGRT00000020495	19136	HNRNPAB	heterogeneous nuclear ribonucleoprotein A/B [Source:HGNC Symbol;Acc:HGNC:5034]	-	-	-	-	GO:0005654//nucleoplasm;GO:1990904//ribonucleoprotein complex	GO:0003676//nucleic acid binding	-
MergePeak_14244	6	111495980	111496639	0.0119	0.128	71	49	50	40	28	35	1.960000	2.330000	3.800000	1.430000	0.860000	1.590000	2.700000	1.290000	-1.065588	5' UTR	111495961	111582946	86986	+	ENSBGRG00000001484	ENSBGRT00000002733	111495961	111582946	86986	+	ENSBGRG00000001484	ENSBGRT00000002733	348	SEC24B	SEC24 homolog B, COPII coat complex component [Source:HGNC Symbol;Acc:HGNC:10704]	Human Diseases;Genetic Information Processing	Infectious diseases;Folding, sorting and degradation	ko05130//Pathogenic Escherichia coli infection;ko04141//Protein processing in endoplasmic reticulum	K14007;K14007	GO:0005829//cytosol;GO:0030127//COPII vesicle coat	GO:0008270//zinc ion binding	GO:0001843//neural tube closure;GO:0002093//auditory receptor cell morphogenesis;GO:0003151//outflow tract morphogenesis;GO:0006886//intracellular protein transport;GO:0006888//ER to Golgi vesicle-mediated transport;GO:0021747//cochlear nucleus development;GO:0035909//aorta morphogenesis;GO:0060088//auditory receptor cell stereocilium organization;GO:0060425//lung morphogenesis;GO:0060463//lung l…
MergePeak_12858	4	118072416	118073014	0.012	0.128	89	43	42	24	33	41	2.710000	2.250000	3.510000	0.950000	1.120000	2.050000	2.820000	1.370000	-1.041519	Promoter (<=1kb)	118027787	118072551	44765	-	ENSBGRG00000013466	ENSBGRT00000025804	118027787	118072551	44765	-	ENSBGRG00000013466	ENSBGRT00000027197	-164	COL1A2	collagen type I alpha 2 chain [Source:HGNC Symbol;Acc:HGNC:2198]	Environmental Information Processing;Human Diseases;Human Diseases;Cellular Processes;Organismal Systems;Human Diseases;Organismal Systems;Organismal Systems;Human Diseases;Environmental Information Processing	Signal transduction;Infectious diseases;Cancers;Cellular community - eukaryotes;Endocrine system;Infectious diseases;Immune system;Digestive system;Endocrine and metabolic diseases;Signaling molecules and interaction	ko04151//PI3K-Akt signaling pathway;ko05165//Human papillomavirus infection;ko05205//Proteoglycans in cancer;ko04510//Focal adhesion;ko04926//Relaxin signaling pathway;ko05146//Amoebiasis;ko04611//Platelet activation;ko04974//Protein digestion and absorption;ko04933//AGE-RAGE signaling pathway in diabetic complications;ko04512//ECM-receptor interaction	K06236;K06236;K06236;K06236;K06236;K06236;K06236;K06236;K06236;K06236	GO:0005581//collagen trimer;GO:0005584//collagen type I trimer;GO:0005615//extracellular space;GO:0005783//endoplasmic reticulum	GO:0002020//protease binding;GO:0005201//extracellular matrix structural constituent;GO:0030674//protein binding, bridging;GO:0042802//identical protein binding;GO:0046332//SMAD binding;GO:0048407//platelet-derived growth factor binding	GO:0001501//skeletal system development;GO:0001568//blood vessel development;GO:0007179//transforming growth factor beta receptor signaling pathway;GO:0007266//Rho protein signal transduction;GO:0008217//regulation of blood pressure;GO:0030199//collagen fibril organization;GO:0030282//bone mineralization;GO:0032963//collagen metabolic process;GO:0043589//skin morphogenesis;GO:0070208//protein het…
MergePeak_15554	8	37369188	37369617	0.012	0.128	85	26	53	18	30	37	3.610000	1.900000	6.180000	0.990000	1.420000	2.580000	3.900000	1.660000	-1.232291	Promoter (<=1kb)	37237765	37368967	131203	-	ENSBGRG00000013273	ENSBGRT00000024305	37237765	37368967	131203	-	ENSBGRG00000013273	ENSBGRT00000024527	-435	DMXL1	Dmx like 1 [Source:HGNC Symbol;Acc:HGNC:2937]	-	-	-	-	-	GO:0005515//protein binding	-
MergePeak_12044	3	110287349	110287784	0.0121	0.128	65	41	41	27	30	31	2.720000	2.950000	4.720000	1.460000	1.400000	2.140000	3.460000	1.670000	-1.050924	Intron (ENSBGRT00000007183/ENSBGRG00000003896, intron 1 of 6)	110282610	110287597	4988	-	ENSBGRG00000003896	ENSBGRT00000007183	110282610	110287597	4988	-	ENSBGRG00000003896	ENSBGRT00000007183	31	RPS8	ribosomal protein S8 [Source:HGNC Symbol;Acc:HGNC:10441]	Genetic Information Processing	Translation	ko03010//Ribosome	K02995	GO:0005783//endoplasmic reticulum;GO:0005829//cytosol;GO:0005840//ribosome;GO:0022627//cytosolic small ribosomal subunit;GO:1990904//ribonucleoprotein complex	GO:0003735//structural constituent of ribosome	GO:0006412//translation
MergePeak_341	1	76646874	76647430	0.0123	0.129	75	43	59	33	36	39	2.460000	2.420000	5.310000	1.400000	1.320000	2.100000	3.400000	1.610000	-1.078474	Exon (ENSBGRT00000032649/ENSBGRG00000017823, exon 1 of 1)	76646138	76647334	1197	-	ENSBGRG00000017823	ENSBGRT00000032649	76646138	76647334	1197	-	ENSBGRG00000017823	ENSBGRT00000032649	182	-	-	-	-	-	-	-	-	-
MergePeak_10008	26	599707	600114	0.0123	0.129	65	33	72	34	29	36	2.910000	2.540000	8.850000	1.970000	1.450000	2.650000	4.770000	2.020000	-1.239634	Promoter (<=1kb)	596735	599742	3008	-	ENSBGRG00000018274	ENSBGRT00000033656	596735	599742	3008	-	ENSBGRG00000018274	ENSBGRT00000033714	-168	LAMTOR4	late endosomal/lysosomal adaptor, MAPK and MTOR activator 4 [Source:HGNC Symbol;Acc:HGNC:33772]	Environmental Information Processing	Signal transduction	ko04150//mTOR signaling pathway	K20399	GO:0005764//lysosome;GO:0043231//intracellular membrane-bounded organelle;GO:0071986//Ragulator complex	GO:0005085//guanyl-nucleotide exchange factor activity;GO:0060090//molecular adaptor activity	GO:0008361//regulation of cell size;GO:0032008//positive regulation of TOR signaling;GO:0061462//protein localization to lysosome;GO:0071230//cellular response to amino acid stimulus
MergePeak_7770	20	48584490	48585073	0.0124	0.129	59	59	36	29	31	33	1.850000	3.170000	3.090000	1.170000	1.080000	1.700000	2.700000	1.320000	-1.032421	Intron (ENSBGRT00000029975/ENSBGRG00000015414, intron 2 of 28)	48510256	48652028	141773	+	ENSBGRG00000015414	ENSBGRT00000029975	48510256	48652028	141773	+	ENSBGRG00000015414	ENSBGRT00000029975	74525	GLG1	golgi glycoprotein 1 [Source:HGNC Symbol;Acc:HGNC:4316]	Environmental Information Processing	Signaling molecules and interaction	ko04514//Cell adhesion molecules (CAMs)	K06816	GO:0000139//Golgi membrane;GO:0005794//Golgi apparatus;GO:0016020//membrane;GO:0031012//extracellular matrix	-	GO:0010955//negative regulation of protein processing;GO:0030512//negative regulation of transforming growth factor beta receptor signaling pathway;GO:0032330//regulation of chondrocyte differentiation;GO:0060349//bone morphogenesis
MergePeak_11427	3	9079345	9079878	0.0126	0.129	95	54	81	63	45	40	3.250000	3.170000	7.600000	2.780000	1.720000	2.250000	4.670000	2.250000	-1.053498	Intron (ENSBGRT00000001668/ENSBGRG00000000904, intron 2 of 9)	9069015	9084839	15825	-	ENSBGRG00000000904	ENSBGRT00000001668	9069015	9084839	15825	-	ENSBGRG00000000904	ENSBGRT00000001668	5228	NECTIN4	nectin cell adhesion molecule 4 [Source:HGNC Symbol;Acc:HGNC:19688]	Cellular Processes	Cellular community - eukaryotes	ko04520//Adherens junction	K06593	GO:0005886//plasma membrane;GO:0005912//adherens junction	GO:0042802//identical protein binding	GO:0007155//cell adhesion;GO:0046718//viral entry into host cell
MergePeak_2085	11	76933188	76933902	0.0126	0.129	70	48	45	45	37	21	1.790000	2.100000	3.150000	1.480000	1.050000	0.880000	2.350000	1.140000	-1.043627	Promoter (<=1kb)	76921317	76933288	11972	-	ENSBGRG00000008858	ENSBGRT00000016289	76921317	76933288	11972	-	ENSBGRG00000008858	ENSBGRT00000016289	-257	ACYP1	acylphosphatase 1 [Source:HGNC Symbol;Acc:HGNC:179]	Metabolism;Metabolism	Global and overview maps;Carbohydrate metabolism	ko01100//Metabolic pathways;ko00620//Pyruvate metabolism	K01512;K01512	-	GO:0003998//acylphosphatase activity	-
MergePeak_15314	8	12690067	12690423	0.0127	0.13	65	41	54	43	41	16	3.330000	3.600000	7.590000	2.850000	2.340000	1.350000	4.840000	2.180000	-1.150679	5' UTR	12690138	12702117	11980	+	ENSBGRG00000023126	ENSBGRT00000042706	12690138	12702117	11980	+	ENSBGRG00000023126	ENSBGRT00000042706	107	DCAF15	DDB1 and CUL4 associated factor 15 [Source:HGNC Symbol;Acc:HGNC:25095]	-	-	-	-	GO:0080008//Cul4-RING E3 ubiquitin ligase complex	GO:0008144//drug binding	GO:0000209//protein polyubiquitination;GO:0016567//protein ubiquitination;GO:0032814//regulation of natural killer cell activation
MergePeak_229	1	61078849	61079694	0.0127	0.13	104	37	56	49	49	22	2.240000	1.370000	3.320000	1.370000	1.180000	0.780000	2.310000	1.110000	-1.057333	Intron (ENSBGRT00000000401/ENSBGRG00000000255, intron 3 of 3)	60988247	61183820	195574	+	ENSBGRG00000000255	ENSBGRT00000000401	60988247	61183820	195574	+	ENSBGRG00000000255	ENSBGRT00000000401	91024	PHLDB2	pleckstrin homology like domain family B member 2 [Source:HGNC Symbol;Acc:HGNC:29573]	-	-	-	-	GO:0005829//cytosol;GO:0005886//plasma membrane;GO:0005925//focal adhesion;GO:0031252//cell leading edge;GO:0045111//intermediate filament cytoskeleton;GO:0045180//basal cortex	GO:0008081//phosphoric diester hydrolase activity	GO:0000226//microtubule cytoskeleton organization;GO:0006629//lipid metabolic process;GO:0010470//regulation of gastrulation;GO:0010717//regulation of epithelial to mesenchymal transition;GO:0045184//establishment of protein localization;GO:0051497//negative regulation of stress fiber assembly;GO:0051895//negative regulation of focal adhesion assembly;GO:0070507//regulation of microtubule cytoske…
MergePeak_7180	2	92512404	92513185	0.0127	0.13	71	34	55	37	38	24	1.660000	1.360000	3.520000	1.120000	0.990000	0.920000	2.180000	1.010000	-1.109973	Intron (ENSBGRT00000008162/ENSBGRG00000004374, intron 1 of 10)	92028077	92514405	486329	-	ENSBGRG00000004374	ENSBGRT00000008162	92028077	92514405	486329	-	ENSBGRG00000004374	ENSBGRT00000008162	1611	GTDC1	glycosyltransferase like domain containing 1 [Source:HGNC Symbol;Acc:HGNC:20887]	-	-	-	-	-	-	-
MergePeak_15430	8	20747947	20748408	0.0128	0.13	105	38	46	48	32	30	4.150000	2.580000	4.990000	2.450000	1.410000	1.950000	3.910000	1.940000	-1.011112	Promoter (<=1kb)	20748412	20776462	28051	+	ENSBGRG00000015300	ENSBGRT00000028721	20748412	20776258	27847	+	ENSBGRG00000015300	ENSBGRT00000028887	-235	SH3GL1	SH3 domain containing GRB2 like 1, endophilin A2 [Source:HGNC Symbol;Acc:HGNC:10830]	Cellular Processes	Transport and catabolism	ko04144//Endocytosis	K11247	GO:0005737//cytoplasm;GO:0005829//cytosol;GO:0098793//presynapse;GO:0098978//glutamatergic synapse	GO:0005515//protein binding;GO:0042802//identical protein binding	GO:0016191//synaptic vesicle uncoating
MergePeak_9823	25	26863896	26864322	0.013	0.13	90	45	41	33	24	41	3.850000	3.310000	4.820000	1.820000	1.150000	2.880000	3.990000	1.950000	-1.032915	Exon (ENSBGRT00000022802/ENSBGRG00000012483, exon 1 of 3)	26863905	26867753	3849	+	ENSBGRG00000012483	ENSBGRT00000022802	26863905	26867753	3849	+	ENSBGRG00000012483	ENSBGRT00000022802	204	SFR1	SWI5 dependent homologous recombination repair protein 1 [Source:HGNC Symbol;Acc:HGNC:29574]	-	-	-	-	GO:0005634//nucleus;GO:0032798//Swi5-Sfr1 complex	GO:0030374//nuclear receptor transcription coactivator activity	GO:0000724//double-strand break repair via homologous recombination;GO:0045893//positive regulation of transcription, DNA-templated;GO:0071391//cellular response to estrogen stimulus
MergePeak_14080	6	65218853	65219585	0.013	0.13	108	41	78	54	45	41	2.690000	1.750000	5.330000	1.740000	1.250000	1.680000	3.260000	1.560000	-1.063326	Promoter (<=1kb)	65136537	65218984	82448	-	ENSBGRG00000003750	ENSBGRT00000007303	65136537	65218984	82448	-	ENSBGRG00000003750	ENSBGRT00000007303	-235	WDR19	WD repeat domain 19 [Source:HGNC Symbol;Acc:HGNC:18340]	-	-	-	-	GO:0005929//cilium;GO:0030991//intraciliary transport particle A;GO:0031514//motile cilium;GO:0032391//photoreceptor connecting cilium;GO:0097730//non-motile cilium	GO:0005515//protein binding	GO:0000902//cell morphogenesis;GO:0001701//in utero embryonic development;GO:0007224//smoothened signaling pathway;GO:0008406//gonad development;GO:0030326//embryonic limb morphogenesis;GO:0031076//embryonic camera-type eye development;GO:0035721//intraciliary retrograde transport;GO:0042471//ear morphogenesis;GO:0048701//embryonic cranial skeleton morphogenesis;GO:0050877//nervous system process…
MergePeak_6709	2	9133211	9133698	0.013	0.13	64	41	40	37	32	21	2.400000	2.640000	4.110000	1.790000	1.340000	1.290000	3.050000	1.470000	-1.052993	Promoter (1-2kb)	9134916	9217534	82619	+	ENSBGRG00000007301	ENSBGRT00000013449	9134916	9217534	82619	+	ENSBGRG00000007301	ENSBGRT00000013449	-1462	CLIC4	chloride intracellular channel 4 [Source:HGNC Symbol;Acc:HGNC:13518]	-	-	-	-	GO:0005737//cytoplasm;GO:0005739//mitochondrion;GO:0005813//centrosome;GO:0005829//cytosol;GO:0005886//plasma membrane;GO:0005902//microvillus;GO:0005911//cell-cell junction;GO:0009986//cell surface;GO:0015630//microtubule cytoskeleton;GO:0016363//nuclear matrix;GO:0030496//midbody;GO:0045177//apical part of cell;GO:0048471//perinuclear region of cytoplasm	-	GO:0001525//angiogenesis;GO:0001886//endothelial cell morphogenesis;GO:0007035//vacuolar acidification;GO:0009566//fertilization;GO:0030216//keratinocyte differentiation;GO:0030336//negative regulation of cell migration;GO:0035264//multicellular organism growth;GO:0048754//branching morphogenesis of an epithelial tube;GO:0061299//retina vasculature morphogenesis in camera-type eye;GO:0071277//cel…
MergePeak_13444	5	84049247	84049678	0.0131	0.13	76	40	35	23	35	31	3.220000	2.900000	4.060000	1.260000	1.650000	2.160000	3.390000	1.690000	-1.004262	Intron (ENSBGRT00000002819/ENSBGRG00000001355, intron 2 of 31)	83903636	84079020	175385	-	ENSBGRG00000001355	ENSBGRT00000002819	83903636	84079020	175385	-	ENSBGRG00000001355	ENSBGRT00000002819	29558	PLXNC1	plexin C1 [Source:HGNC Symbol;Acc:HGNC:9106]	Organismal Systems	Development	ko04360//Axon guidance	K06572	-	GO:0005515//protein binding;GO:0017154//semaphorin receptor activity	GO:0007165//signal transduction;GO:0071526//semaphorin-plexin signaling pathway
MergePeak_8076	20	67126532	67127224	0.0131	0.13	99	60	39	61	19	27	2.610000	2.710000	2.820000	2.080000	0.560000	1.170000	2.710000	1.270000	-1.093464	Intron (ENSBGRT00000045210/ENSBGRG00000024478, intron 1 of 12)	67108636	67132639	24004	-	ENSBGRG00000024478	ENSBGRT00000045210	67108636	67132639	24004	-	ENSBGRG00000024478	ENSBGRT00000045210	5761	SAMD4B	sterile alpha motif domain containing 4B [Source:HGNC Symbol;Acc:HGNC:25492]	-	-	-	-	GO:0005829//cytosol	GO:0003723//RNA binding;GO:0005515//protein binding;GO:0030371//translation repressor activity	GO:0017148//negative regulation of translation;GO:0043488//regulation of mRNA stability
MergePeak_7478	20	1491504	1492090	0.0131	0.13	72	31	45	24	34	29	2.240000	1.660000	3.840000	0.960000	1.180000	1.480000	2.580000	1.210000	-1.092364	Promoter (<=1kb)	1491906	1636382	144477	+	ENSBGRG00000011874	ENSBGRT00000021735	1491906	1636240	144335	+	ENSBGRG00000011874	ENSBGRT00000021929	-109	PEPD	peptidase D [Source:HGNC Symbol;Acc:HGNC:8840]	-	-	-	-	-	GO:0004177//aminopeptidase activity;GO:0008233//peptidase activity;GO:0030145//manganese ion binding	-
MergePeak_2979	13	32176421	32177086	0.0133	0.13	72	36	63	49	37	19	1.970000	1.690000	4.740000	1.740000	1.130000	0.860000	2.800000	1.240000	-1.175087	Promoter (<=1kb)	32161881	32176494	14614	-	ENSBGRG00000024225	ENSBGRT00000044739	32161881	32176494	14614	-	ENSBGRG00000024225	ENSBGRT00000044739	-259	NEU3	neuraminidase 3 [Source:HGNC Symbol;Acc:HGNC:7760]	Metabolism;Metabolism;Metabolism	Global and overview maps;Lipid metabolism;Glycan biosynthesis and metabolism	ko01100//Metabolic pathways;ko00600//Sphingolipid metabolism;ko00511//Other glycan degradation	K12357;K12357;K12357	GO:0005886//plasma membrane	GO:0004308//exo-alpha-sialidase activity;GO:0016997//alpha-sialidase activity	GO:0005975//carbohydrate metabolic process;GO:0006689//ganglioside catabolic process;GO:0009313//oligosaccharide catabolic process
MergePeak_10316	26	39212381	39212964	0.0134	0.13	77	43	56	46	38	28	2.410000	2.310000	4.810000	1.860000	1.330000	1.440000	3.180000	1.540000	-1.046096	Promoter (<=1kb)	39176595	39212652	36058	-	ENSBGRG00000007132	ENSBGRT00000013415	39176595	39212652	36058	-	ENSBGRG00000007132	ENSBGRT00000013501	-20	PMM2	NP_001030267.1 phosphomannomutase 2 [Bos taurus]	Metabolism;Metabolism;Metabolism	Global and overview maps;Carbohydrate metabolism;Carbohydrate metabolism	ko01100//Metabolic pathways;ko00520//Amino sugar and nucleotide sugar metabolism;ko00051//Fructose and mannose metabolism	K17497;K17497;K17497	-	GO:0004615//phosphomannomutase activity	GO:0009298//GDP-mannose biosynthetic process
MergePeak_12942	5	3990738	3991252	0.0135	0.13	57	41	51	37	20	30	2.020000	2.500000	4.960000	1.700000	0.790000	1.750000	3.160000	1.410000	-1.164229	Intron (ENSBGRT00000000458/ENSBGRG00000000284, intron 7 of 10)	3675640	3996679	321040	+	ENSBGRG00000000284	ENSBGRT00000000458	3675640	3996679	321040	+	ENSBGRG00000000284	ENSBGRT00000000458	315355	ETV6	ETS variant transcription factor 6 [Source:HGNC Symbol;Acc:HGNC:3495]	Human Diseases;Environmental Information Processing;Organismal Systems	Cancers;Signal transduction;Development	ko05202//Transcriptional misregulation in cancers;ko04013//MAPK signaling pathway - fly;ko04320//Dorso-ventral axis formation	K03211;K03211;K03211	GO:0005634//nucleus;GO:0005730//nucleolus;GO:0005829//cytosol	GO:0000977//RNA polymerase II regulatory region sequence-specific DNA binding;GO:0000978//RNA polymerase II proximal promoter sequence-specific DNA binding;GO:0001227//DNA-binding transcription repressor activity, RNA polymerase II-specific;GO:0001228//DNA-binding transcription activator activity, RNA polymerase II-specific;GO:0003677//DNA binding;GO:0003700//DNA-binding transcription factor acti…	GO:0000122//negative regulation of transcription by RNA polymerase II;GO:0006355//regulation of transcription, DNA-templated;GO:0007296//vitellogenesis;GO:0022008//neurogenesis;GO:0030154//cell differentiation;GO:0045944//positive regulation of transcription by RNA polymerase II;GO:0071425//hematopoietic stem cell proliferation;GO:0097152//mesenchymal cell apoptotic process
MergePeak_13217	5	49116493	49116816	0.0135	0.13	77	42	49	45	13	31	4.350000	4.070000	7.590000	3.280000	0.820000	2.880000	5.340000	2.330000	-1.196510	Promoter (<=1kb)	49100694	49116435	15742	-	ENSBGRG00000008064	ENSBGRT00000015621	49100694	49116435	15742	-	ENSBGRG00000008064	ENSBGRT00000015797	-219	DCTN2	dynactin subunit 2 [Source:HGNC Symbol;Acc:HGNC:2712]	Human Diseases;Organismal Systems	Neurodegenerative diseases;Excretory system	ko05016//Huntington disease;ko04962//Vasopressin-regulated water reabsorption	K10424;K10424	GO:0000776//kinetochore;GO:0005813//centrosome;GO:0005829//cytosol;GO:0005869//dynactin complex;GO:0030426//growth cone;GO:0031982//vesicle	GO:0019901//protein kinase binding;GO:0030507//spectrin binding;GO:0042802//identical protein binding	GO:0007017//microtubule-based process;GO:0007052//mitotic spindle organization;GO:0007080//mitotic metaphase plate congression;GO:0032402//melanosome transport;GO:0071539//protein localization to centrosome
MergePeak_2019	11	70239366	70239895	0.0136	0.13	75	50	42	38	18	37	2.590000	2.960000	3.970000	1.690000	0.690000	2.100000	3.170000	1.490000	-1.089171	Intron (ENSBGRT00000011927/ENSBGRG00000006291, intron 9 of 10)	69485194	70361251	876058	+	ENSBGRG00000006291	ENSBGRT00000011927	69485194	70361251	876058	+	ENSBGRG00000006291	ENSBGRT00000011927	754436	RAD51B	RAD51 paralog B [Source:HGNC Symbol;Acc:HGNC:9822]	Genetic Information Processing	Replication and repair	ko03440//Homologous recombination	K10869	GO:0033063//Rad51B-Rad51C-Rad51D-XRCC2 complex	GO:0003677//DNA binding;GO:0005524//ATP binding;GO:0008094//DNA-dependent ATPase activity	GO:0000724//double-strand break repair via homologous recombination;GO:0001701//in utero embryonic development;GO:0001832//blastocyst growth;GO:0006281//DNA repair;GO:0008284//positive regulation of cell proliferation;GO:0061053//somite development
MergePeak_11700	3	45587323	45588011	0.0136	0.13	80	38	53	41	35	30	2.120000	1.730000	3.850000	1.400000	1.030000	1.310000	2.570000	1.250000	-1.039840	Intron (ENSBGRT00000014198/ENSBGRG00000007757, intron 1 of 10)	45533956	45615364	81409	-	ENSBGRG00000007757	ENSBGRT00000014198	45533956	45615364	81409	-	ENSBGRG00000007757	ENSBGRT00000014198	27697	CASQ2	calsequestrin 2 [Source:HGNC Symbol;Acc:HGNC:1513]	Environmental Information Processing;Organismal Systems	Signal transduction;Circulatory system	ko04020//Calcium signaling pathway;ko04260//Cardiac muscle contraction	K23445;K23445	GO:0005737//cytoplasm;GO:0030018//Z disc;GO:0030314//junctional membrane complex;GO:0033018//sarcoplasmic reticulum lumen	GO:0005509//calcium ion binding;GO:0048306//calcium-dependent protein binding	GO:0002027//regulation of heart rate;GO:0010649//regulation of cell communication by electrical coupling;GO:0010880//regulation of release of sequestered calcium ion into cytosol by sarcoplasmic reticulum;GO:0010881//regulation of cardiac muscle contraction by regulation of the release of sequestered calcium ion;GO:0043267//negative regulation of potassium ion transport;GO:0045214//sarcomere orga…
MergePeak_15140	7	118008580	118009297	0.0137	0.13	100	48	91	58	49	46	2.540000	2.100000	6.350000	1.910000	1.390000	1.920000	3.660000	1.740000	-1.072756	Promoter (<=1kb)	118009496	118011772	2277	+	ENSBGRG00000012160	ENSBGRT00000022235	118009496	118010989	1494	+	ENSBGRG00000012160	ENSBGRT00000022274	-558	HMGB2	high mobility group box 2 [Source:HGNC Symbol;Acc:HGNC:5000]	-	-	-	-	GO:0000790//nuclear chromatin;GO:0000793//condensed chromosome;GO:0005615//extracellular space;GO:0005623//cell;GO:0005634//nucleus;GO:0005654//nucleoplasm;GO:0005730//nucleolus;GO:0005737//cytoplasm;GO:0032991//protein-containing complex;GO:0048471//perinuclear region of cytoplasm	GO:0000987//proximal promoter sequence-specific DNA binding;GO:0003677//DNA binding;GO:0003684//damaged DNA binding;GO:0003690//double-stranded DNA binding;GO:0003713//transcription coactivator activity;GO:0008134//transcription factor binding;GO:0008301//DNA binding, bending;GO:0019904//protein domain specific binding;GO:0042056//chemoattractant activity;GO:0044212//transcription regulatory regi…	GO:0001938//positive regulation of endothelial cell proliferation;GO:0002437//inflammatory response to antigenic stimulus;GO:0006357//regulation of transcription by RNA polymerase II;GO:0007283//spermatogenesis;GO:0007289//spermatid nucleus differentiation;GO:0008584//male gonad development;GO:0010628//positive regulation of gene expression;GO:0010629//negative regulation of gene expression;GO:00…
MergePeak_2676	12	70143559	70144058	0.0139	0.132	99	37	61	31	41	44	3.620000	2.320000	6.120000	1.460000	1.670000	2.640000	4.020000	1.920000	-1.066089	5' UTR	70143742	70149491	5750	+	ENSBGRG00000018402	ENSBGRT00000033701	70143742	70147097	3356	+	ENSBGRG00000018402	ENSBGRT00000034215	66	UBE2C	ubiquitin conjugating enzyme E2 C [Source:HGNC Symbol;Acc:HGNC:15937]	Genetic Information Processing	Folding, sorting and degradation	ko04120//Ubiquitin mediated proteolysis	K06688	GO:0000151//ubiquitin ligase complex;GO:0005680//anaphase-promoting complex;GO:0005829//cytosol;GO:0005886//plasma membrane	GO:0004842//ubiquitin-protein transferase activity;GO:0044389//ubiquitin-like protein ligase binding;GO:0061631//ubiquitin conjugating enzyme activity	GO:0006511//ubiquitin-dependent protein catabolic process;GO:0010458//exit from mitosis;GO:0010994//free ubiquitin chain polymerization;GO:0016567//protein ubiquitination;GO:0031145//anaphase-promoting complex-dependent catabolic process;GO:0031536//positive regulation of exit from mitosis;GO:0070936//protein K48-linked ubiquitination;GO:0070979//protein K11-linked ubiquitination
MergePeak_3008	13	34374672	34375389	0.0141	0.133	60	88	53	44	41	43	1.530000	3.840000	3.700000	1.450000	1.160000	1.800000	3.020000	1.470000	-1.038732	Intron (ENSBGRT00000011819/ENSBGRG00000006242, intron 3 of 34)	34342705	34415658	72954	+	ENSBGRG00000006242	ENSBGRT00000011819	34342705	34415658	72954	+	ENSBGRG00000006242	ENSBGRT00000011819	32325	ARAP1	ArfGAP with RhoGAP domain, ankyrin repeat and PH domain 1 [Source:HGNC Symbol;Acc:HGNC:16925]	Cellular Processes	Transport and catabolism	ko04144//Endocytosis	K18439	GO:0005654//nucleoplasm;GO:0005794//Golgi apparatus;GO:0005829//cytosol;GO:0005886//plasma membrane;GO:0043231//intracellular membrane-bounded organelle	GO:0005096//GTPase activator activity;GO:0005515//protein binding;GO:0005547//phosphatidylinositol-3,4,5-trisphosphate binding	GO:0007165//signal transduction;GO:0008360//regulation of cell shape;GO:0043547//positive regulation of GTPase activity;GO:0051270//regulation of cellular component movement;GO:0051491//positive regulation of filopodium assembly;GO:0051497//negative regulation of stress fiber assembly
MergePeak_7064	2	55663037	55663604	0.0142	0.133	86	42	52	39	33	38	2.770000	2.320000	4.590000	1.620000	1.180000	2.010000	3.230000	1.600000	-1.013462	Promoter (<=1kb)	55663553	55673581	10029	+	ENSBGRG00000000539	ENSBGRT00000000953	55663553	55673581	10029	+	ENSBGRG00000000539	ENSBGRT00000000953	-233	HSPD1	heat shock protein family D (Hsp60) member 1 [Source:HGNC Symbol;Acc:HGNC:5261]	Human Diseases;Human Diseases;Organismal Systems;Genetic Information Processing;Human Diseases	Infectious diseases;Endocrine and metabolic diseases;Aging;Folding, sorting and degradation;Infectious diseases	ko05152//Tuberculosis;ko04940//Type I diabetes mellitus;ko04212//Longevity regulating pathway - worm;ko03018//RNA degradation;ko05134//Legionellosis	K04077;K04077;K04077;K04077;K04077	GO:0005737//cytoplasm;GO:0005739//mitochondrion;GO:0005886//plasma membrane;GO:0016020//membrane;GO:0030141//secretory granule;GO:0043231//intracellular membrane-bounded organelle	GO:0001530//lipopolysaccharide binding;GO:0005524//ATP binding	GO:0006457//protein folding;GO:0009409//response to cold;GO:0032727//positive regulation of interferon-alpha production;GO:0032729//positive regulation of interferon-gamma production;GO:0042026//protein refolding;GO:0042110//T cell activation;GO:0050870//positive regulation of T cell activation;GO:0098761//cellular response to interleukin-7
MergePeak_4575	16	48423858	48424489	0.0143	0.133	89	48	42	52	21	29	2.570000	2.380000	3.330000	1.940000	0.680000	1.380000	2.760000	1.330000	-1.053242	Promoter (<=1kb)	48424852	48436565	11714	+	ENSBGRG00000005330	ENSBGRT00000009858	48424852	48436565	11714	+	ENSBGRG00000005330	ENSBGRT00000009858	-679	ZNF140	zinc finger protein 140 [Source:HGNC Symbol;Acc:HGNC:12925]	Human Diseases	Infectious diseases	ko05168//Herpes simplex infection	K09228	-	GO:0001227//DNA-binding transcription repressor activity, RNA polymerase II-specific;GO:0003676//nucleic acid binding;GO:0043565//sequence-specific DNA binding	GO:0000122//negative regulation of transcription by RNA polymerase II;GO:0006355//regulation of transcription, DNA-templated
MergePeak_11822	3	71990048	71990452	0.0143	0.133	49	40	49	25	25	32	2.210000	3.100000	6.070000	1.460000	1.260000	2.370000	3.790000	1.700000	-1.156663	Intron (ENSBGRT00000004165/ENSBGRG00000002233, intron 3 of 5)	71935087	72044692	109606	-	ENSBGRG00000002233	ENSBGRT00000004165	71935087	72044692	109606	-	ENSBGRG00000002233	ENSBGRT00000004165	54442	GIPC2	GIPC PDZ domain containing family member 2 [Source:HGNC Symbol;Acc:HGNC:18177]	-	-	-	-	-	GO:0005515//protein binding;GO:0042802//identical protein binding	-
MergePeak_3910	14	83501080	83501664	0.0144	0.133	71	41	45	41	29	27	2.220000	2.200000	3.860000	1.650000	1.010000	1.390000	2.760000	1.350000	-1.031709	3' UTR	83496370	83502889	6520	+	ENSBGRG00000007735	ENSBGRT00000014162	83496370	83502889	6520	+	ENSBGRG00000007735	ENSBGRT00000014162	5002	PRELP	proline and arginine rich end leucine rich repeat protein [Source:HGNC Symbol;Acc:HGNC:9357]	-	-	-	-	GO:0062023//collagen-containing extracellular matrix	GO:0005201//extracellular matrix structural constituent;GO:0005515//protein binding	GO:0007569//cell aging
MergePeak_13408	5	80895452	80895905	0.0144	0.133	68	36	44	43	27	19	2.740000	2.490000	4.860000	2.240000	1.210000	1.260000	3.360000	1.570000	-1.097697	Promoter (<=1kb)	80895964	80918537	22574	+	ENSBGRG00000002871	ENSBGRT00000005376	80895964	80918537	22574	+	ENSBGRG00000002871	ENSBGRT00000005376	-286	ESPL1	extra spindle pole bodies like 1, separase [Source:HGNC Symbol;Acc:HGNC:16856]	Human Diseases;Cellular Processes;Cellular Processes	Infectious diseases;Cell growth and death;Cell growth and death	ko05166//HTLV-I infection;ko04110//Cell cycle;ko04114//Oocyte meiosis	K02365;K02365;K02365	GO:0005634//nucleus;GO:0005813//centrosome	GO:0008233//peptidase activity;GO:0008234//cysteine-type peptidase activity	GO:0000070//mitotic sister chromatid segregation;GO:0000212//meiotic spindle organization;GO:0000278//mitotic cell cycle;GO:0006508//proteolysis;GO:0007059//chromosome segregation;GO:0007127//meiosis I;GO:0045143//homologous chromosome segregation
MergePeak_11381	3	3276506	3276960	0.0145	0.133	92	48	43	44	23	38	3.700000	3.310000	4.740000	2.280000	1.030000	2.510000	3.920000	1.940000	-1.014797	Intron (ENSBGRT00000012297/ENSBGRG00000006648, intron 1 of 5)	3271917	3282228	10312	-	ENSBGRG00000006648	ENSBGRT00000012297	3271917	3282228	10312	-	ENSBGRG00000006648	ENSBGRT00000012297	5495	HDGF	heparin binding growth factor [Source:HGNC Symbol;Acc:HGNC:4856]	-	-	-	-	GO:0005615//extracellular space;GO:0005634//nucleus;GO:0005654//nucleoplasm;GO:0017053//transcriptional repressor complex	GO:0001222//transcription corepressor binding;GO:0003714//transcription corepressor activity	GO:0000122//negative regulation of transcription by RNA polymerase II;GO:0009987//cellular process;GO:0098761//cellular response to interleukin-7
MergePeak_1510	11	2730940	2731419	0.0148	0.135	78	31	41	42	22	21	2.970000	2.030000	4.280000	2.070000	0.930000	1.310000	3.090000	1.440000	-1.101538	Intron (ENSBGRT00000037874/ENSBGRG00000020584, intron 9 of 9)	2679122	2731748	52627	+	ENSBGRG00000020584	ENSBGRT00000037874	2679122	2731748	52627	+	ENSBGRG00000020584	ENSBGRT00000037874	52057	KHNYN	KH and NYN domain containing [Source:HGNC Symbol;Acc:HGNC:20166]	-	-	-	-	-	-	-
MergePeak_1606	11	13088011	13088441	0.0148	0.135	55	32	59	36	14	30	2.330000	2.330000	6.870000	1.970000	0.660000	2.090000	3.840000	1.570000	-1.290342	Promoter (<=1kb)	13088321	13114252	25932	+	ENSBGRG00000004257	ENSBGRT00000008056	13088321	13114252	25932	+	ENSBGRG00000004257	ENSBGRT00000008056	-95	PSMC6	proteasome 26S subunit, ATPase 6 [Source:HGNC Symbol;Acc:HGNC:9553]	Human Diseases;Genetic Information Processing	Infectious diseases;Folding, sorting and degradation	ko05169//Epstein-Barr virus infection;ko03050//Proteasome	K03064;K03064	GO:0005737//cytoplasm;GO:0008540//proteasome regulatory particle, base subcomplex;GO:0022624//proteasome accessory complex	GO:0005524//ATP binding;GO:0016787//hydrolase activity;GO:0016887//ATPase activity	GO:0030163//protein catabolic process;GO:0030433//ubiquitin-dependent ERAD pathway
MergePeak_11059	29	8225677	8226149	0.0148	0.135	94	43	69	48	36	43	3.630000	2.850000	7.310000	2.400000	1.550000	2.730000	4.600000	2.230000	-1.044590	Promoter (1-2kb)	8219565	8224626	5062	-	ENSBGRG00000020712	ENSBGRT00000038642	8220288	8224626	4339	-	ENSBGRG00000020712	ENSBGRT00000038729	-1287	MUS81	MUS81 structure-specific endonuclease subunit [Source:HGNC Symbol;Acc:HGNC:29814]	Genetic Information Processing;Genetic Information Processing	Replication and repair;Replication and repair	ko03460//Fanconi anemia pathway;ko03440//Homologous recombination	K08991;K08991	-	GO:0003677//DNA binding;GO:0004518//nuclease activity;GO:0048257//3'-flap endonuclease activity	GO:0000737//DNA catabolic process, endonucleolytic;GO:0006281//DNA repair;GO:0033687//osteoblast proliferation;GO:0072429//response to intra-S DNA damage checkpoint signaling
MergePeak_4456	16	15047217	15047690	0.0148	0.135	42	58	41	42	12	23	1.620000	3.840000	4.340000	2.090000	0.520000	1.460000	3.270000	1.360000	-1.265684	Promoter (1-2kb)	15021421	15046114	24694	-	ENSBGRG00000019539	ENSBGRT00000035908	15027286	15046114	18829	-	ENSBGRG00000019539	ENSBGRT00000035998	-1339	MSMO1	methylsterol monooxygenase 1 [Source:HGNC Symbol;Acc:HGNC:10545]	Metabolism;Metabolism	Global and overview maps;Lipid metabolism	ko01100//Metabolic pathways;ko00100//Steroid biosynthesis	K07750;K07750	-	GO:0005506//iron ion binding;GO:0016491//oxidoreductase activity	GO:0008610//lipid biosynthetic process;GO:0055114//oxidation-reduction process
MergePeak_5249	17	75757195	75757776	0.0151	0.135	55	60	40	38	31	29	1.730000	3.230000	3.440000	1.540000	1.090000	1.500000	2.800000	1.380000	-1.020759	Intron (ENSBGRT00000014196/ENSBGRG00000007640, intron 5 of 6)	75753489	75766908	13420	+	ENSBGRG00000007640	ENSBGRT00000014196	75753489	75766908	13420	+	ENSBGRG00000007640	ENSBGRT00000014196	3996	CRIP2	KQK74640.1 hypothetical protein AAES_156279 [Amazona aestiva]	-	-	-	-	-	-	-
MergePeak_14146	6	88897011	88897506	0.0151	0.135	64	55	36	38	25	31	2.360000	3.480000	3.640000	1.810000	1.030000	1.880000	3.160000	1.570000	-1.009160	Intron (ENSBGRT00000037773/ENSBGRG00000020518, intron 2 of 15)	88883467	88950544	67078	+	ENSBGRG00000020518	ENSBGRT00000037773	88883467	88950544	67078	+	ENSBGRG00000020518	ENSBGRT00000037773	13791	PKD2	polycystin 2, transient receptor potential cation channel [Source:HGNC Symbol;Acc:HGNC:9009]	-	-	-	-	GO:0002133//polycystin complex;GO:0005737//cytoplasm;GO:0005783//endoplasmic reticulum;GO:0005789//endoplasmic reticulum membrane;GO:0005794//Golgi apparatus;GO:0005886//plasma membrane;GO:0005887//integral component of plasma membrane;GO:0005911//cell-cell junction;GO:0005929//cilium;GO:0009925//basal plasma membrane;GO:0016020//membrane;GO:0030027//lamellipodium;GO:0031514//motile cilium;GO:003…	GO:0005102//signaling receptor binding;GO:0005244//voltage-gated ion channel activity;GO:0005245//voltage-gated calcium channel activity;GO:0005248//voltage-gated sodium channel activity;GO:0005249//voltage-gated potassium channel activity;GO:0005261//cation channel activity;GO:0005262//calcium channel activity;GO:0005267//potassium channel activity;GO:0005509//calcium ion binding;GO:0008092//cyt…	GO:0001658//branching involved in ureteric bud morphogenesis;GO:0001822//kidney development;GO:0001889//liver development;GO:0001892//embryonic placenta development;GO:0001947//heart looping;GO:0003127//detection of nodal flow;GO:0006816//calcium ion transport;GO:0006874//cellular calcium ion homeostasis;GO:0007050//cell cycle arrest;GO:0007259//JAK-STAT cascade;GO:0007368//determination of left/…
MergePeak_4528	16	32866203	32866732	0.0151	0.135	65	35	48	31	25	32	2.240000	2.070000	4.540000	1.380000	0.960000	1.810000	2.950000	1.380000	-1.096047	5' UTR	32804994	32866544	61551	-	ENSBGRG00000009049	ENSBGRT00000016820	32804994	32866544	61551	-	ENSBGRG00000009049	ENSBGRT00000016820	77	HSPA4L	heat shock protein family A (Hsp70) member 4 like [Source:HGNC Symbol;Acc:HGNC:17041]	Genetic Information Processing	Folding, sorting and degradation	ko04141//Protein processing in endoplasmic reticulum	K09485	GO:0005829//cytosol	-	-
MergePeak_2009	11	69011870	69012538	0.0151	0.135	117	32	81	50	48	40	3.190000	1.500000	6.070000	1.760000	1.460000	1.790000	3.590000	1.670000	-1.104136	Promoter (<=1kb)	69012389	69034166	21778	+	ENSBGRG00000005627	ENSBGRT00000010443	69012389	69034166	21778	+	ENSBGRG00000005627	ENSBGRT00000010443	-185	EIF2S1	XP_016079291.1 PREDICTED: eukaryotic translation initiation factor 2 subunit 1 isoform X1 [Miniopterus natalensis]	Human Diseases;Human Diseases;Human Diseases;Genetic Information Processing;Human Diseases;Genetic Information Processing;Human Diseases;Human Diseases;Cellular Processes;Cellular Processes	Infectious diseases;Neurodegenerative diseases;Infectious diseases;Translation;Endocrine and metabolic diseases;Folding, sorting and degradation;Infectious diseases;Infectious diseases;Cell growth and death;Transport and catabolism	ko05168//Herpes simplex infection;ko05010//Alzheimer disease;ko05162//Measles;ko03013//RNA transport;ko04932//Non-alcoholic fatty liver disease (NAFLD);ko04141//Protein processing in endoplasmic reticulum;ko05164//Influenza A;ko05160//Hepatitis C;ko04210//Apoptosis;ko04140//Autophagy - animal	K03237;K03237;K03237;K03237;K03237;K03237;K03237;K03237;K03237;K03237	-	GO:0003676//nucleic acid binding;GO:0003723//RNA binding;GO:0003743//translation initiation factor activity	-
MergePeak_3136	13	48574682	48575211	0.0152	0.135	92	55	41	48	14	37	3.170000	3.250000	3.880000	2.140000	0.540000	2.100000	3.430000	1.590000	-1.109182	Exon (ENSBGRT00000014680/ENSBGRG00000008015, exon 1 of 5)	48522934	48575010	52077	-	ENSBGRG00000008015	ENSBGRT00000014680	48522934	48575010	52077	-	ENSBGRG00000008015	ENSBGRT00000014680	64	CYP2R1	cytochrome P450 family 2 subfamily R member 1 [Source:HGNC Symbol;Acc:HGNC:20580]	Metabolism;Metabolism	Global and overview maps;Lipid metabolism	ko01100//Metabolic pathways;ko00100//Steroid biosynthesis	K07419;K07419	-	GO:0005506//iron ion binding;GO:0016705//oxidoreductase activity, acting on paired donors, with incorporation or reduction of molecular oxygen;GO:0020037//heme binding;GO:0030343//vitamin D3 25-hydroxylase activity;GO:0042803//protein homodimerization activity;GO:1902271//D3 vitamins binding	GO:0036378//calcitriol biosynthetic process from calciol;GO:0042359//vitamin D metabolic process;GO:0055114//oxidation-reduction process
MergePeak_2990	13	33309227	33309765	0.0153	0.135	80	45	67	28	48	44	2.710000	2.620000	6.230000	1.230000	1.810000	2.450000	3.850000	1.830000	-1.073015	Promoter (<=1kb)	33310064	33405746	95683	+	ENSBGRG00000005036	ENSBGRT00000009439	33310064	33372995	62932	+	ENSBGRG00000005036	ENSBGRT00000009544	-568	RAB6A	RAB6A, member RAS oncogene family [Source:HGNC Symbol;Acc:HGNC:9786]	-	-	-	-	GO:0000139//Golgi membrane;GO:0005794//Golgi apparatus;GO:0005802//trans-Golgi network;GO:0005829//cytosol;GO:0016020//membrane;GO:0031410//cytoplasmic vesicle;GO:0070381//endosome to plasma membrane transport vesicle	GO:0003924//GTPase activity;GO:0005525//GTP binding;GO:0019904//protein domain specific binding;GO:0031489//myosin V binding	GO:0006890//retrograde vesicle-mediated transport, Golgi to ER;GO:0018125//peptidyl-cysteine methylation;GO:0019882//antigen processing and presentation;GO:0034067//protein localization to Golgi apparatus;GO:0034498//early endosome to Golgi transport
MergePeak_6278	19	33655162	33655585	0.0153	0.135	89	53	46	46	15	40	3.840000	3.920000	5.440000	2.560000	0.720000	2.830000	4.400000	2.040000	-1.108934	Promoter (<=1kb)	33655589	33724261	68673	+	ENSBGRG00000024203	ENSBGRT00000044712	33655589	33720203	64615	+	ENSBGRG00000024203	ENSBGRT00000044741	-216	SPECC1	XP_010814402.1 cytospin-B isoform X6 [Bos taurus]	-	-	-	-	-	-	-
MergePeak_4691	16	68544401	68544908	0.0154	0.135	79	26	47	26	25	33	2.840000	1.610000	4.640000	1.210000	1.000000	1.950000	3.030000	1.390000	-1.124233	Promoter (1-2kb)	68545920	68724395	178476	+	ENSBGRG00000020611	ENSBGRT00000047863	68545920	68724395	178476	+	ENSBGRG00000020611	ENSBGRT00000047863	-1266	HECTD4	HECT domain E3 ubiquitin protein ligase 4 [Source:HGNC Symbol;Acc:HGNC:26611]	-	-	-	-	-	GO:0004842//ubiquitin-protein transferase activity	-
MergePeak_1531	11	4551742	4552172	0.0158	0.136	52	41	62	33	29	34	2.210000	2.980000	7.210000	1.810000	1.370000	2.370000	4.130000	1.850000	-1.158617	Intron (ENSBGRT00000025484/ENSBGRG00000013760, intron 1 of 13)	4541273	4582384	41112	+	ENSBGRG00000013760	ENSBGRT00000025484	4541273	4582384	41112	+	ENSBGRG00000013760	ENSBGRT00000025484	10684	GRAMD2A	GRAM domain containing 2A [Source:HGNC Symbol;Acc:HGNC:27287]	-	-	-	-	GO:0031227//intrinsic component of endoplasmic reticulum membrane;GO:0031234//extrinsic component of cytoplasmic side of plasma membrane;GO:0044232//organelle membrane contact site	GO:0005546//phosphatidylinositol-4,5-bisphosphate binding;GO:0035091//phosphatidylinositol binding	GO:0061817//endoplasmic reticulum-plasma membrane tethering;GO:2001256//regulation of store-operated calcium entry
MergePeak_934	10	4176428	4176890	0.0158	0.136	78	59	55	60	35	29	3.080000	4.000000	5.960000	3.060000	1.540000	1.880000	4.350000	2.160000	-1.009984	Promoter (<=1kb)	4177237	4266943	89707	+	ENSBGRG00000019842	ENSBGRT00000036525	4177237	4266452	89216	+	ENSBGRG00000019842	ENSBGRT00000037784	-578	SHPRH	SNF2 histone linker PHD RING helicase [Source:HGNC Symbol;Acc:HGNC:19336]	-	-	-	-	GO:0000786//nucleosome;GO:0005634//nucleus	GO:0003677//DNA binding;GO:0004842//ubiquitin-protein transferase activity;GO:0005524//ATP binding;GO:0031625//ubiquitin protein ligase binding	GO:0000209//protein polyubiquitination;GO:0006334//nucleosome assembly;GO:0006974//cellular response to DNA damage stimulus
MergePeak_5991	19	13436044	13436464	0.0158	0.136	77	37	58	27	30	43	3.340000	2.760000	6.910000	1.510000	1.450000	3.070000	4.340000	2.010000	-1.110500	Intron (ENSBGRT00000045878/ENSBGRG00000024535, intron 6 of 13)	13382594	13451221	68628	+	ENSBGRG00000024535	ENSBGRT00000045878	13382594	13451221	68628	+	ENSBGRG00000024535	ENSBGRT00000045878	53660	BAIAP2	BAR/IMD domain containing adaptor protein 2 [Source:HGNC Symbol;Acc:HGNC:947]	Human Diseases;Cellular Processes;Human Diseases;Cellular Processes	Infectious diseases;Cell motility;Infectious disease: bacterial;Cellular community - eukaryotes	ko05130//Pathogenic Escherichia coli infection;ko04810//Regulation of actin cytoskeleton;ko05135//Yersinia infection;ko04520//Adherens junction	K05627;K05627;K05627;K05627	GO:0005829//cytosol;GO:0005886//plasma membrane;GO:0015629//actin cytoskeleton;GO:0043005//neuron projection;GO:0098685//Schaffer collateral - CA1 synapse	GO:0005515//protein binding;GO:0008093//cytoskeletal adaptor activity;GO:0042802//identical protein binding;GO:0070064//proline-rich region binding	GO:0007009//plasma membrane organization;GO:0008360//regulation of cell shape;GO:0009617//response to bacterium;GO:0016358//dendrite development;GO:0032956//regulation of actin cytoskeleton organization;GO:0048167//regulation of synaptic plasticity;GO:0050804//modulation of chemical synaptic transmission;GO:0051017//actin filament bundle assembly;GO:0051764//actin crosslink formation;GO:0099564//…
MergePeak_4097	15	20938290	20938781	0.0159	0.136	66	28	52	27	23	33	2.450000	1.780000	5.300000	1.300000	0.950000	2.010000	3.180000	1.420000	-1.163136	Intron (ENSBGRT00000035658/ENSBGRG00000019190, intron 1 of 11)	20938139	20957380	19242	+	ENSBGRG00000019190	ENSBGRT00000035658	20938139	20957380	19242	+	ENSBGRG00000019190	ENSBGRT00000035658	396	UPF3A	UPF3A regulator of nonsense mediated mRNA decay [Source:HGNC Symbol;Acc:HGNC:20332]	Genetic Information Processing;Genetic Information Processing	Translation;Translation	ko03013//RNA transport;ko03015//mRNA surveillance pathway	K14328;K14328	GO:0005654//nucleoplasm;GO:0005829//cytosol;GO:0035145//exon-exon junction complex;GO:0043231//intracellular membrane-bounded organelle	GO:0003676//nucleic acid binding;GO:0042162//telomeric DNA binding	GO:0000184//nuclear-transcribed mRNA catabolic process, nonsense-mediated decay;GO:0045727//positive regulation of translation
MergePeak_4478	16	18492707	18493156	0.016	0.136	74	44	51	47	36	26	3.010000	3.070000	5.680000	2.470000	1.630000	1.740000	3.920000	1.950000	-1.007380	Intron (ENSBGRT00000040315/ENSBGRG00000021671, intron 1 of 6)	18326710	18627076	300367	+	ENSBGRG00000021671	ENSBGRT00000040315	18326710	18627076	300367	+	ENSBGRG00000021671	ENSBGRT00000040315	166221	RNF150	ring finger protein 150 [Source:HGNC Symbol;Acc:HGNC:23138]	-	-	-	-	-	-	-
MergePeak_6621	2	2860996	2861284	0.0161	0.136	54	49	37	35	28	25	3.420000	5.330000	6.430000	2.860000	1.980000	2.600000	5.060000	2.480000	-1.028797	Promoter (<=1kb)	2806451	2861094	54644	-	ENSBGRG00000003470	ENSBGRT00000006479	2806451	2861094	54644	-	ENSBGRG00000003470	ENSBGRT00000006503	-46	IFFO2	intermediate filament family orphan 2 [Source:HGNC Symbol;Acc:HGNC:27006]	-	-	-	-	-	-	-
MergePeak_9754	25	22057736	22058392	0.0162	0.136	107	47	37	52	19	32	2.970000	2.240000	2.820000	1.870000	0.590000	1.460000	2.680000	1.310000	-1.032666	Intron (ENSBGRT00000040753/ENSBGRG00000021985, intron 8 of 11)	21993595	22075094	81500	+	ENSBGRG00000021985	ENSBGRT00000040753	21993595	22075094	81500	+	ENSBGRG00000021985	ENSBGRT00000040753	64469	CNNM1	cyclin and CBS domain divalent metal cation transport mediator 1 [Source:HGNC Symbol;Acc:HGNC:102]	-	-	-	-	GO:0005886//plasma membrane;GO:0030425//dendrite;GO:0043025//neuronal cell body	-	-
MergePeak_14885	7	61192341	61192699	0.0164	0.136	62	38	54	42	24	28	3.160000	3.320000	7.550000	2.760000	1.360000	2.340000	4.680000	2.150000	-1.122172	Promoter (<=1kb)	61193214	61295862	102649	+	ENSBGRG00000014025	ENSBGRT00000025859	61193214	61276903	83690	+	ENSBGRG00000014025	ENSBGRT00000026427	-694	TLE1	TLE family member 1, transcriptional corepressor [Source:HGNC Symbol;Acc:HGNC:11837]	-	-	-	-	GO:0005634//nucleus;GO:0005654//nucleoplasm;GO:0005829//cytosol;GO:1990907//beta-catenin-TCF complex	GO:0003714//transcription corepressor activity;GO:0005515//protein binding;GO:0008134//transcription factor binding;GO:0042802//identical protein binding	GO:0006355//regulation of transcription, DNA-templated;GO:0010628//positive regulation of gene expression;GO:0043124//negative regulation of I-kappaB kinase/NF-kappaB signaling;GO:0045892//negative regulation of transcription, DNA-templated;GO:2000811//negative regulation of anoikis
MergePeak_11426	3	9044486	9044985	0.0166	0.137	72	49	47	45	26	33	2.630000	3.070000	4.710000	2.120000	1.060000	1.980000	3.470000	1.720000	-1.012527	Promoter (1-2kb)	9039799	9042898	3100	-	ENSBGRG00000000853	ENSBGRT00000001550	9039799	9042898	3100	-	ENSBGRG00000000853	ENSBGRT00000001550	-1837	USF1	upstream transcription factor 1 [Source:HGNC Symbol;Acc:HGNC:12593]	-	-	-	-	GO:0000790//nuclear chromatin;GO:0005634//nucleus;GO:0005654//nucleoplasm;GO:0005667//transcription factor complex	GO:0000981//DNA-binding transcription factor activity, RNA polymerase II-specific;GO:0003677//DNA binding;GO:0003700//DNA-binding transcription factor activity;GO:0019899//enzyme binding;GO:0019901//protein kinase binding;GO:0042802//identical protein binding;GO:0042803//protein homodimerization activity;GO:0042826//histone deacetylase binding;GO:0043425//bHLH transcription factor binding;GO:0043…	GO:0000432//positive regulation of transcription from RNA polymerase II promoter by glucose;GO:0001666//response to hypoxia;GO:0006366//transcription by RNA polymerase II;GO:0009411//response to UV;GO:0019086//late viral transcription;GO:0032869//cellular response to insulin stimulus;GO:0045893//positive regulation of transcription, DNA-templated;GO:0045944//positive regulation of transcription b…
MergePeak_13238	5	54215892	54216480	0.0166	0.137	68	38	52	33	23	37	2.110000	2.020000	4.420000	1.320000	0.800000	1.890000	2.850000	1.340000	-1.088729	Promoter (<=1kb)	54216412	54366275	149864	+	ENSBGRG00000009962	ENSBGRT00000018334	54216412	54304265	87854	+	ENSBGRG00000009962	ENSBGRT00000018967	-226	USP15	ubiquitin specific peptidase 15 [Source:HGNC Symbol;Acc:HGNC:12613]	Cellular Processes	Transport and catabolism	ko04137//Mitophagy - animal	K21343	GO:0005634//nucleus;GO:0005737//cytoplasm;GO:0005829//cytosol	GO:0003824//catalytic activity;GO:0004197//cysteine-type endopeptidase activity;GO:0004843//thiol-dependent ubiquitin-specific protease activity;GO:0005160//transforming growth factor beta receptor binding;GO:0036459//thiol-dependent ubiquitinyl hydrolase activity;GO:0042802//identical protein binding;GO:0046332//SMAD binding;GO:0061649//ubiquitin modification-dependent histone binding;GO:1990380…	GO:0006511//ubiquitin-dependent protein catabolic process;GO:0007179//transforming growth factor beta receptor signaling pathway;GO:0016579//protein deubiquitination;GO:0030509//BMP signaling pathway;GO:0035520//monoubiquitinated protein deubiquitination;GO:0035616//histone H2B conserved C-terminal lysine deubiquitination;GO:0060389//pathway-restricted SMAD protein phosphorylation;GO:1900246//pos…
MergePeak_15644	8	50119062	50119646	0.0168	0.138	77	37	49	30	36	35	2.400000	1.980000	4.200000	1.210000	1.250000	1.800000	2.860000	1.420000	-1.010124	Promoter (<=1kb)	50119583	50127287	7705	+	ENSBGRG00000001715	ENSBGRT00000003171	50119583	50126857	7275	+	ENSBGRG00000001715	ENSBGRT00000003195	-229	CAMLG	calcium modulating ligand [Source:HGNC Symbol;Acc:HGNC:1471]	-	-	-	-	GO:0005737//cytoplasm;GO:0005783//endoplasmic reticulum	GO:0031625//ubiquitin protein ligase binding	GO:0031397//negative regulation of protein ubiquitination;GO:0032435//negative regulation of proteasomal ubiquitin-dependent protein catabolic process;GO:0050821//protein stabilization
MergePeak_7594	20	21495316	21496016	0.0169	0.138	106	35	36	42	20	32	2.760000	1.570000	2.570000	1.410000	0.580000	1.370000	2.300000	1.120000	-1.038135	Promoter (<=1kb)	21495955	21508992	13038	+	ENSBGRG00000014585	ENSBGRT00000026909	21495955	21508733	12779	+	ENSBGRG00000014585	ENSBGRT00000026981	-289	CFAP20	cilia and flagella associated protein 20 [Source:HGNC Symbol;Acc:HGNC:29523]	-	-	-	-	GO:0005654//nucleoplasm;GO:0005814//centriole;GO:0005929//cilium;GO:0036064//ciliary basal body	-	GO:0018095//protein polyglutamylation;GO:0060271//cilium assembly;GO:0060296//regulation of cilium beat frequency involved in ciliary motility;GO:2000147//positive regulation of cell motility;GO:2000253//positive regulation of feeding behavior
MergePeak_577	1	117437430	117438041	0.0171	0.139	104	40	32	23	24	43	3.100000	2.050000	2.620000	0.890000	0.800000	2.110000	2.590000	1.270000	-1.028124	Intron (ENSBGRT00000025295/ENSBGRG00000013519, intron 1 of 7)	117065948	117793968	728021	-	ENSBGRG00000013519	ENSBGRT00000025295	117065948	117793968	728021	-	ENSBGRG00000013519	ENSBGRT00000025295	356233	Iqcj-Schip1	XP_024846273.1 schwannomin-interacting protein 1 isoform X1 [Bos taurus]	-	-	-	-	-	-	-
MergePeak_1828	11	42347322	42347846	0.0171	0.139	65	59	52	48	17	37	2.260000	3.520000	4.970000	2.160000	0.660000	2.120000	3.580000	1.650000	-1.117494	Promoter (<=1kb)	42339919	42347291	7373	-	ENSBGRG00000016198	ENSBGRT00000029706	42339919	42347291	7373	-	ENSBGRG00000016198	ENSBGRT00000029706	-293	C15orf65	chromosome 15 open reading frame 65 [Source:HGNC Symbol;Acc:HGNC:44654]	-	-	-	-	-	-	-
MergePeak_17080	X	118674275	118674933	0.0173	0.139	8240	11147	9484	2592	3294	6094	228.360000	530.260000	721.190000	92.800000	101.820000	277.560000	493.270000	157.390000	-1.648034	Promoter (1-2kb)	118673105	118673323	219	-	ENSBGRG00000008563	ENSBGRT00000015580	118673105	118673323	219	-	ENSBGRG00000008563	ENSBGRT00000015580	-1281	--	BAE89224.1 unnamed protein product [Macaca fascicularis]	-	-	-	-	-	-	-
MergePeak_798	1	157216637	157217171	0.0174	0.139	65	45	44	27	31	37	2.220000	2.640000	4.120000	1.190000	1.180000	2.080000	2.990000	1.480000	-1.014548	Intron (ENSBGRT00000040707/ENSBGRG00000021882, intron 3 of 22)	157189200	157272842	83643	+	ENSBGRG00000021882	ENSBGRT00000040707	157189200	157272842	83643	+	ENSBGRG00000021882	ENSBGRT00000040707	27704	TRAPPC10	NP_001192814.1 trafficking protein particle complex subunit 10 [Bos taurus]	-	-	-	-	-	-	-
MergePeak_4482	16	19104689	19105370	0.0174	0.139	89	73	73	57	23	58	2.380000	3.360000	5.360000	1.970000	0.690000	2.550000	3.700000	1.740000	-1.088438	Exon (ENSBGRT00000041133/ENSBGRG00000022257, exon 1 of 4)	19060356	19105122	44767	-	ENSBGRG00000022257	ENSBGRT00000041133	19060356	19105122	44767	-	ENSBGRG00000022257	ENSBGRT00000041133	93	SCOC	XP_005895879.1 PREDICTED: short coiled-coil protein isoform X1 [Bos mutus]	-	-	-	-	-	-	-
MergePeak_15291	8	11587920	11588331	0.0176	0.14	85	37	48	47	31	27	3.770000	2.820000	5.840000	2.690000	1.530000	1.970000	4.140000	2.060000	-1.006986	Promoter (<=1kb)	11584860	11587787	2928	-	ENSBGRG00000006722	ENSBGRT00000012408	11584860	11587787	2928	-	ENSBGRG00000006722	ENSBGRT00000012408	-338	DNASE2	deoxyribonuclease 2, lysosomal [Source:HGNC Symbol;Acc:HGNC:2960]	Cellular Processes	Transport and catabolism	ko04142//Lysosome	K01158	-	GO:0004531//deoxyribonuclease II activity	GO:0000737//DNA catabolic process, endonucleolytic;GO:0006259//DNA metabolic process;GO:0006308//DNA catabolic process;GO:0030218//erythrocyte differentiation;GO:0050776//regulation of immune response
MergePeak_4604	16	56594564	56595178	0.0177	0.14	98	55	87	68	42	47	2.910000	2.800000	7.090000	2.610000	1.390000	2.290000	4.270000	2.100000	-1.023847	Intron (ENSBGRT00000023355/ENSBGRG00000012520, intron 10 of 48)	56519276	56710531	191256	+	ENSBGRG00000012520	ENSBGRT00000023355	56519276	56710531	191256	+	ENSBGRG00000012520	ENSBGRT00000023355	75595	NCOR2	nuclear receptor corepressor 2 [Source:HGNC Symbol;Acc:HGNC:7673]	Human Diseases;Environmental Information Processing	Infectious diseases;Signal transduction	ko05169//Epstein-Barr virus infection;ko04330//Notch signaling pathway	K06065;K06065	GO:0000790//nuclear chromatin;GO:0005634//nucleus;GO:0005654//nucleoplasm;GO:0016363//nuclear matrix;GO:0016604//nuclear body;GO:0017053//transcriptional repressor complex	GO:0003677//DNA binding;GO:0003714//transcription corepressor activity;GO:0005112//Notch binding;GO:0042826//histone deacetylase binding;GO:0047485//protein N-terminus binding	GO:0000122//negative regulation of transcription by RNA polymerase II;GO:0010565//regulation of cellular ketone metabolic process;GO:0045892//negative regulation of transcription, DNA-templated;GO:0060766//negative regulation of androgen receptor signaling pathway;GO:1903799//negative regulation of production of miRNAs involved in gene silencing by miRNA
MergePeak_1729	11	30753606	30754191	0.0178	0.14	79	45	34	43	41	13	2.460000	2.410000	2.910000	1.730000	1.430000	0.670000	2.590000	1.280000	-1.016808	5' UTR	30753423	30850567	97145	+	ENSBGRG00000022716	ENSBGRT00000041926	30753423	30850567	97145	+	ENSBGRG00000022716	ENSBGRT00000041926	475	FRMD6	FERM domain containing 6 [Source:HGNC Symbol;Acc:HGNC:19839]	Environmental Information Processing;Environmental Information Processing	Signal transduction;Signal transduction	ko04390//Hippo signaling pathway;ko04392//Hippo signaling pathway - multiple species	K16822;K16822	GO:0005856//cytoskeleton	-	-
MergePeak_17120	Y	3849651	3850376	0.0181	0.14	87	40	55	52	32	30	2.190000	1.730000	3.800000	1.690000	0.900000	1.240000	2.570000	1.280000	-1.005625	5' UTR	3849865	3931719	81855	+	ENSBGRG00000017714	ENSBGRT00000032448	3849865	3910386	60522	+	ENSBGRG00000017714	ENSBGRT00000032531	148	PUDP	NP_001040060.1 pseudouridine-5'-phosphatase [Bos taurus]	-	-	-	-	-	GO:0016787//hydrolase activity	-
MergePeak_4413	16	4220004	4220636	0.0184	0.14	87	39	49	53	27	26	2.510000	1.930000	3.880000	1.980000	0.870000	1.230000	2.770000	1.360000	-1.026279	Intron (ENSBGRT00000020175/ENSBGRG00000011004, intron 1 of 22)	4163361	4577420	414060	+	ENSBGRG00000011004	ENSBGRT00000020175	4163361	4577420	414060	+	ENSBGRG00000011004	ENSBGRT00000020175	56959	ARHGAP10	Rho GTPase activating protein 10 [Source:HGNC Symbol;Acc:HGNC:26099]	Human Diseases	Infectious diseases	ko05100//Bacterial invasion of epithelial cells	K13736	GO:0005829//cytosol	GO:0005096//GTPase activator activity;GO:0005515//protein binding	GO:0007010//cytoskeleton organization;GO:0007165//signal transduction;GO:0043066//negative regulation of apoptotic process
MergePeak_10788	28	1008387	1008895	0.0185	0.14	67	58	27	43	36	13	2.410000	3.570000	2.660000	1.990000	1.440000	0.770000	2.880000	1.400000	-1.040642	Intron (ENSBGRT00000014539/ENSBGRG00000007575, intron 12 of 14)	830971	1097483	266513	-	ENSBGRG00000007575	ENSBGRT00000014539	830971	1097483	266513	-	ENSBGRG00000007575	ENSBGRT00000014539	88842	MCPH1	microcephalin 1 [Source:HGNC Symbol;Acc:HGNC:6954]	-	-	-	-	-	GO:0042802//identical protein binding	GO:0000122//negative regulation of transcription by RNA polymerase II;GO:0021987//cerebral cortex development;GO:0071850//mitotic cell cycle arrest
MergePeak_15463	8	22261725	22262213	0.0186	0.14	78	30	42	27	25	34	2.910000	1.920000	4.310000	1.300000	1.040000	2.090000	3.050000	1.480000	-1.043212	Intron (ENSBGRT00000002240/ENSBGRG00000001223, intron 2 of 4)	22188265	22334986	146722	+	ENSBGRG00000001223	ENSBGRT00000002240	22188265	22334986	146722	+	ENSBGRG00000001223	ENSBGRT00000002240	73704	-	-	-	-	-	-	-	-	-
MergePeak_12491	4	45169454	45170080	0.0187	0.14	62	38	63	51	19	27	1.810000	1.900000	5.040000	1.920000	0.620000	1.290000	2.920000	1.280000	-1.189825	Intron (ENSBGRT00000018059/ENSBGRG00000009831, intron 1 of 1)	45168711	45171342	2632	+	ENSBGRG00000009831	ENSBGRT00000018059	45168711	45171342	2632	+	ENSBGRG00000009831	ENSBGRT00000018059	1056	-	-	-	-	-	-	-	-	-
MergePeak_4110	15	24988948	24989535	0.0188	0.141	88	53	51	63	24	29	2.730000	2.830000	4.350000	2.530000	0.830000	1.480000	3.300000	1.610000	-1.035405	Intron (ENSBGRT00000036325/ENSBGRG00000019693, intron 2 of 7)	24954187	25028324	74138	-	ENSBGRG00000019693	ENSBGRT00000036325	24954187	25028324	74138	-	ENSBGRG00000019693	ENSBGRT00000036325	39083	NDFIP2	Nedd4 family interacting protein 2 [Source:HGNC Symbol;Acc:HGNC:18537]	-	-	-	-	GO:0005737//cytoplasm;GO:0005739//mitochondrion;GO:0005783//endoplasmic reticulum;GO:0005794//Golgi apparatus;GO:0043231//intracellular membrane-bounded organelle;GO:0048471//perinuclear region of cytoplasm	GO:0050699//WW domain binding	GO:0007034//vacuolar transport;GO:0010629//negative regulation of gene expression;GO:0030001//metal ion transport;GO:0031398//positive regulation of protein ubiquitination;GO:0032410//negative regulation of transporter activity;GO:0051224//negative regulation of protein transport
MergePeak_1094	10	29104157	29104650	0.0193	0.142	76	47	65	43	40	41	2.810000	2.980000	6.600000	2.050000	1.650000	2.490000	4.130000	2.060000	-1.003497	Promoter (<=1kb)	29104501	29136952	32452	+	ENSBGRG00000026235	ENSBGRT00000048514	29104501	29136952	32452	+	ENSBGRG00000026235	ENSBGRT00000048514	-98	CASP8AP2	caspase 8 associated protein 2 [Source:HGNC Symbol;Acc:HGNC:1510]	-	-	-	-	-	GO:0003677//DNA binding	GO:0097190//apoptotic signaling pathway
MergePeak_8906	23	2426939	2427468	0.0195	0.142	74	26	49	41	27	21	2.550000	1.540000	4.630000	1.830000	1.040000	1.190000	2.910000	1.350000	-1.108060	Intron (ENSBGRT00000027302/ENSBGRG00000014556, intron 2 of 9)	2365550	2428812	63263	-	ENSBGRG00000014556	ENSBGRT00000027302	2365550	2428812	63263	-	ENSBGRG00000014556	ENSBGRT00000027302	1609	ERGIC1	endoplasmic reticulum-golgi intermediate compartment 1 [Source:HGNC Symbol;Acc:HGNC:29205]	-	-	-	-	-	-	-
MergePeak_13324	5	71993403	71994164	0.0196	0.142	86	32	41	25	27	38	2.060000	1.320000	2.700000	0.770000	0.720000	1.500000	2.030000	1.000000	-1.021480	Intron (ENSBGRT00000040477/ENSBGRG00000021443, intron 1 of 20)	71935242	72189298	254057	+	ENSBGRG00000021443	ENSBGRT00000040477	71935242	72189298	254057	+	ENSBGRG00000021443	ENSBGRT00000040477	58541	ANO6	anoctamin 6 [Source:HGNC Symbol;Acc:HGNC:25240]	-	-	-	-	GO:0005829//cytosol;GO:0005886//plasma membrane;GO:0005887//integral component of plasma membrane;GO:0034707//chloride channel complex	GO:0005227//calcium activated cation channel activity;GO:0005229//intracellular calcium activated chloride channel activity;GO:0005244//voltage-gated ion channel activity;GO:0005247//voltage-gated chloride channel activity;GO:0017128//phospholipid scramblase activity;GO:0042802//identical protein binding;GO:0042803//protein homodimerization activity;GO:0046983//protein dimerization activity	GO:0002407//dendritic cell chemotaxis;GO:0002543//activation of blood coagulation via clotting cascade;GO:0006812//cation transport;GO:0006821//chloride transport;GO:0007596//blood coagulation;GO:0017121//phospholipid scrambling;GO:0030501//positive regulation of bone mineralization;GO:0032060//bleb assembly;GO:0034767//positive regulation of ion transmembrane transport;GO:0035590//purinergic nuc…
MergePeak_6684	2	7866684	7867035	0.0196	0.142	70	33	44	35	20	31	3.640000	2.940000	6.270000	2.350000	1.160000	2.650000	4.280000	2.050000	-1.061987	Promoter (<=1kb)	7865647	7866753	1107	-	ENSBGRG00000004562	ENSBGRT00000008419	7865647	7866753	1107	-	ENSBGRG00000004562	ENSBGRT00000008419	-106	ID3	inhibitor of DNA binding 3, HLH protein [Source:HGNC Symbol;Acc:HGNC:5362]	Cellular Processes;Environmental Information Processing	Cellular community - eukaryotes;Signal transduction	ko04550//Signaling pathways regulating pluripotency of stem cells;ko04350//TGF-beta signaling pathway	K17694;K17694	GO:0005634//nucleus;GO:0005737//cytoplasm	GO:0003713//transcription coactivator activity;GO:0008134//transcription factor binding;GO:0019904//protein domain specific binding;GO:0046983//protein dimerization activity;GO:1901707//leptomycin B binding	GO:0000122//negative regulation of transcription by RNA polymerase II;GO:0001656//metanephros development;GO:0007417//central nervous system development;GO:0007507//heart development;GO:0007623//circadian rhythm;GO:0010628//positive regulation of gene expression;GO:0010629//negative regulation of gene expression;GO:0030855//epithelial cell differentiation;GO:0030903//notochord development;GO:0042…
MergePeak_6048	19	18365430	18365944	0.0196	0.142	102	31	48	44	19	35	3.620000	1.890000	4.670000	2.020000	0.750000	2.040000	3.390000	1.600000	-1.083213	Intron (ENSBGRT00000031809/ENSBGRG00000017221, intron 10 of 11)	18266423	18367075	100653	+	ENSBGRG00000017221	ENSBGRT00000031809	18266423	18367075	100653	+	ENSBGRG00000017221	ENSBGRT00000031809	99264	MARCHF10	membrane associated ring-CH-type finger 10 [Source:HGNC Symbol;Acc:HGNC:26655]	-	-	-	-	-	GO:0008270//zinc ion binding	-
MergePeak_8787	22	49826347	49826941	0.0197	0.142	65	36	47	26	30	35	2.000000	1.900000	3.960000	1.030000	1.030000	1.770000	2.620000	1.280000	-1.033423	Downstream (2-3kb)	49828903	49899320	70418	-	ENSBGRG00000015714	ENSBGRT00000028847	49810032	49816617	6586	-	ENSBGRG00000015541	ENSBGRT00000028795	-10027	TOPAZ1	testis and ovary specific PAZ domain containing 1 [Source:HGNC Symbol;Acc:HGNC:24746]	-	-	-	-	-	-	GO:0006915//apoptotic process;GO:0007286//spermatid development;GO:0048137//spermatocyte division;GO:0098781//ncRNA transcription;GO:1901995//positive regulation of meiotic cell cycle phase transition
MergePeak_13766	5	128831092	128831603	0.0203	0.142	74	52	49	56	23	29	2.640000	3.190000	4.800000	2.580000	0.920000	1.700000	3.540000	1.730000	-1.032977	Promoter (<=1kb)	128831608	128840391	8784	+	ENSBGRG00000002179	ENSBGRT00000004091	128831608	128840391	8784	+	ENSBGRG00000002179	ENSBGRT00000004091	-261	CRELD2	cysteine rich with EGF like domains 2 [Source:HGNC Symbol;Acc:HGNC:28150]	-	-	-	-	GO:0005615//extracellular space;GO:0005783//endoplasmic reticulum;GO:0005794//Golgi apparatus	GO:0005509//calcium ion binding	-
MergePeak_16727	9	92640527	92641049	0.0205	0.142	86	33	45	45	27	27	3.000000	1.980000	4.310000	2.030000	1.050000	1.550000	3.100000	1.540000	-1.009338	Promoter (<=1kb)	92632339	92640692	8354	-	ENSBGRG00000005564	ENSBGRT00000010358	92632339	92640692	8354	-	ENSBGRG00000005564	ENSBGRT00000010358	-96	SNRPG	NP_001035633.1 small nuclear ribonucleoprotein G [Bos taurus]	Genetic Information Processing	Transcription	ko03040//Spliceosome	K11099	GO:0005681//spliceosomal complex	-	GO:0000387//spliceosomal snRNP assembly
MergePeak_13710	5	120884150	120884669	0.0205	0.142	82	42	48	57	28	21	2.880000	2.530000	4.630000	2.590000	1.100000	1.210000	3.350000	1.630000	-1.039289	Intron (ENSBGRT00000014040/ENSBGRG00000007661, intron 1 of 3)	120873908	120896638	22731	+	ENSBGRG00000007661	ENSBGRT00000014040	120873908	120896638	22731	+	ENSBGRG00000007661	ENSBGRT00000014040	10501	TEF	TEF transcription factor, PAR bZIP family member [Source:HGNC Symbol;Acc:HGNC:11722]	-	-	-	-	GO:0005634//nucleus	GO:0003690//double-stranded DNA binding;GO:0003700//DNA-binding transcription factor activity;GO:0043565//sequence-specific DNA binding	GO:0006355//regulation of transcription, DNA-templated;GO:0006357//regulation of transcription by RNA polymerase II;GO:0045944//positive regulation of transcription by RNA polymerase II
MergePeak_5064	17	36865929	36866430	0.0205	0.142	70	43	41	49	29	19	2.550000	2.690000	4.090000	2.300000	1.180000	1.140000	3.110000	1.540000	-1.013984	Intron (ENSBGRT00000009649/ENSBGRG00000005233, intron 1 of 6)	36855873	36882049	26177	-	ENSBGRG00000005233	ENSBGRT00000009649	36855873	36882049	26177	-	ENSBGRG00000005233	ENSBGRT00000009649	15870	LOXL1	lysyl oxidase like 1 [Source:HGNC Symbol;Acc:HGNC:6665]	-	-	-	-	-	GO:0005507//copper ion binding;GO:0016641//oxidoreductase activity, acting on the CH-NH2 group of donors, oxygen as acceptor	GO:0055114//oxidation-reduction process
MergePeak_11438	3	9747835	9748441	0.0205	0.142	66	31	51	31	43	22	1.990000	1.600000	4.210000	1.210000	1.440000	1.090000	2.600000	1.250000	-1.056584	Exon (ENSBGRT00000003778/ENSBGRG00000002021, exon 1 of 6)	9748078	9758940	10863	+	ENSBGRG00000002021	ENSBGRT00000003778	9748078	9758940	10863	+	ENSBGRG00000002021	ENSBGRT00000003778	60	DUSP12	dual specificity phosphatase 12 [Source:HGNC Symbol;Acc:HGNC:3067]	-	-	-	-	GO:0005634//nucleus;GO:0005654//nucleoplasm;GO:0005737//cytoplasm	GO:0008138//protein tyrosine/serine/threonine phosphatase activity;GO:0008270//zinc ion binding;GO:0016791//phosphatase activity	GO:0006470//protein dephosphorylation;GO:0016311//dephosphorylation
MergePeak_1925	11	55694021	55694391	0.0207	0.143	77	36	41	43	8	27	3.790000	3.050000	5.540000	2.740000	0.440000	2.190000	4.130000	1.790000	-1.206182	Intron (ENSBGRT00000044149/ENSBGRG00000023839, intron 1 of 8)	55603513	55828842	225330	+	ENSBGRG00000023839	ENSBGRT00000044149	55603513	55828842	225330	+	ENSBGRG00000023839	ENSBGRT00000044149	90693	SAMD4A	sterile alpha motif domain containing 4A [Source:HGNC Symbol;Acc:HGNC:23023]	-	-	-	-	GO:0001650//fibrillar center;GO:0005829//cytosol;GO:0030054//cell junction;GO:0045202//synapse	GO:0003723//RNA binding;GO:0005515//protein binding;GO:0030371//translation repressor activity	GO:0017148//negative regulation of translation;GO:0043488//regulation of mRNA stability;GO:0045727//positive regulation of translation
MergePeak_773	1	151922198	151922795	0.021	0.144	63	36	52	35	31	31	1.920000	1.890000	4.360000	1.380000	1.060000	1.560000	2.720000	1.330000	-1.032180	Intron (ENSBGRT00000020475/ENSBGRG00000011188, intron 1 of 6)	151916078	151946724	30647	-	ENSBGRG00000011188	ENSBGRT00000020475	151916078	151946724	30647	-	ENSBGRG00000011188	ENSBGRT00000020475	24228	--	XP_022408650.2 LOW QUALITY PROTEIN: non-histone chromosomal protein HMG-14 [Delphinapterus leucas]	-	-	-	-	GO:0000785//chromatin;GO:0005634//nucleus	GO:0031492//nucleosomal DNA binding	-
MergePeak_15355	8	15738233	15738752	0.0212	0.144	99	50	81	75	43	34	3.480000	3.020000	7.810000	3.400000	1.690000	1.960000	4.770000	2.350000	-1.021329	Promoter (<=1kb)	15739369	15788193	48825	+	ENSBGRG00000005309	ENSBGRT00000009939	15739369	15788193	48825	+	ENSBGRG00000005309	ENSBGRT00000009939	-877	CARM1	coactivator associated arginine methyltransferase 1 [Source:HGNC Symbol;Acc:HGNC:23393]	Human Diseases	Drug resistance	ko01522//Endocrine resistance	K05931	GO:0005634//nucleus;GO:0005654//nucleoplasm;GO:0005737//cytoplasm;GO:0005829//cytosol;GO:0032991//protein-containing complex;GO:0090575//RNA polymerase II transcription factor complex	GO:0003713//transcription coactivator activity;GO:0008168//methyltransferase activity;GO:0008276//protein methyltransferase activity;GO:0008469//histone-arginine N-methyltransferase activity;GO:0016274//protein-arginine N-methyltransferase activity;GO:0030374//nuclear receptor transcription coactivator activity;GO:0035242//protein-arginine omega-N asymmetric methyltransferase activity;GO:0035642/…	GO:0003420//regulation of growth plate cartilage chondrocyte proliferation;GO:0006355//regulation of transcription, DNA-templated;GO:0006479//protein methylation;GO:0008284//positive regulation of cell proliferation;GO:0016571//histone methylation;GO:0030518//intracellular steroid hormone receptor signaling pathway;GO:0030520//intracellular estrogen receptor signaling pathway;GO:0032091//negative…
MergePeak_7488	20	2382617	2383071	0.0217	0.144	122	32	56	47	23	44	4.900000	2.210000	6.170000	2.440000	1.030000	2.900000	4.430000	2.120000	-1.063242	Promoter (<=1kb)	2381203	2381916	714	-	ENSBGRG00000015694	ENSBGRT00000028853	2381203	2381916	714	-	ENSBGRG00000015694	ENSBGRT00000028853	-928	RGS9BP	regulator of G protein signaling 9 binding protein [Source:HGNC Symbol;Acc:HGNC:30304]	-	-	-	-	GO:0001750//photoreceptor outer segment	-	GO:0050908//detection of light stimulus involved in visual perception
MergePeak_15485	8	23546677	23547180	0.0217	0.144	67	47	56	44	20	39	2.430000	2.920000	5.570000	2.060000	0.810000	2.320000	3.640000	1.730000	-1.073166	Downstream (<1kb)	23547654	23558369	10716	-	ENSBGRG00000003303	ENSBGRT00000006167	23547654	23558369	10716	-	ENSBGRG00000003303	ENSBGRT00000006167	11441	PDLIM4	PDZ and LIM domain 4 [Source:HGNC Symbol;Acc:HGNC:16501]	-	-	-	-	GO:0001725//stress fiber;GO:0005634//nucleus;GO:0005737//cytoplasm;GO:0005856//cytoskeleton;GO:0030027//lamellipodium;GO:0031941//filamentous actin;GO:0048471//perinuclear region of cytoplasm	GO:0005515//protein binding;GO:0019903//protein phosphatase binding;GO:0042803//protein homodimerization activity;GO:0051393//alpha-actinin binding	GO:0031532//actin cytoskeleton reorganization
MergePeak_16715	9	91949160	91949820	0.0218	0.144	81	33	42	31	21	37	2.240000	1.570000	3.180000	1.110000	0.650000	1.680000	2.330000	1.150000	-1.018696	Promoter (<=1kb)	91764342	91948787	184446	-	ENSBGRG00000004732	ENSBGRT00000008770	91774462	91948787	174326	-	ENSBGRG00000004732	ENSBGRT00000008857	-703	AAK1	AP2 associated kinase 1 [Source:HGNC Symbol;Acc:HGNC:19679]	-	-	-	-	-	GO:0004672//protein kinase activity;GO:0005112//Notch binding;GO:0005524//ATP binding;GO:0035612//AP-2 adaptor complex binding	GO:0006468//protein phosphorylation;GO:0032880//regulation of protein localization;GO:0045747//positive regulation of Notch signaling pathway;GO:0050821//protein stabilization;GO:2000369//regulation of clathrin-dependent endocytosis
MergePeak_95	1	35088756	35089168	0.0218	0.144	38	44	49	37	22	24	1.680000	3.340000	5.950000	2.120000	1.090000	1.750000	3.660000	1.650000	-1.149378	5' UTR	35088954	35098559	9606	+	ENSBGRG00000000117	ENSBGRT00000000186	35088954	35098559	9606	+	ENSBGRG00000000117	ENSBGRT00000000186	8	SOD1	Superoxide dismutase [Cu-Zn] [Source:UniProtKB/Swiss-Prot;Acc:Q52RN5]	Human Diseases;Cellular Processes;Organismal Systems;Human Diseases;Human Diseases	Neurodegenerative diseases;Transport and catabolism;Aging;Neurodegenerative diseases;Neurodegenerative diseases	ko05016//Huntington disease;ko04146//Peroxisome;ko04213//Longevity regulating pathway - multiple species;ko05014//Amyotrophic lateral sclerosis (ALS);ko05020//Prion diseases	K04565;K04565;K04565;K04565;K04565	GO:0005615//extracellular space;GO:0005623//cell;GO:0005634//nucleus;GO:0005654//nucleoplasm;GO:0005737//cytoplasm;GO:0005739//mitochondrion;GO:0005777//peroxisome;GO:0005829//cytosol;GO:0005886//plasma membrane;GO:0031410//cytoplasmic vesicle;GO:0032839//dendrite cytoplasm;GO:0032991//protein-containing complex;GO:0043025//neuronal cell body;GO:1904115//axon cytoplasm	GO:0004784//superoxide dismutase activity;GO:0005507//copper ion binding;GO:0008270//zinc ion binding;GO:0016209//antioxidant activity;GO:0016491//oxidoreductase activity;GO:0030346//protein phosphatase 2B binding;GO:0042802//identical protein binding;GO:0046872//metal ion binding;GO:0048365//Rac GTPase binding;GO:0051087//chaperone binding	GO:0000187//activation of MAPK activity;GO:0000302//response to reactive oxygen species;GO:0000303//response to superoxide;GO:0001541//ovarian follicle development;GO:0001819//positive regulation of cytokine production;GO:0001895//retina homeostasis;GO:0002262//myeloid cell homeostasis;GO:0006749//glutathione metabolic process;GO:0006801//superoxide metabolic process;GO:0006879//cellular iron ion…
MergePeak_12954	5	5202470	5202926	0.0219	0.144	62	40	77	52	29	34	2.480000	2.750000	8.450000	2.690000	1.290000	2.230000	4.560000	2.070000	-1.139403	Promoter (<=1kb)	5157529	5202595	45067	-	ENSBGRG00000000916	ENSBGRT00000001675	5157529	5202595	45067	-	ENSBGRG00000000916	ENSBGRT00000001675	-103	HEBP1	NP_001069453.1 heme-binding protein 1 [Bos taurus]	-	-	-	-	-	-	-
MergePeak_12889	4	121495582	121496028	0.0219	0.144	63	35	51	43	22	27	2.580000	2.460000	5.720000	2.270000	1.000000	1.810000	3.590000	1.690000	-1.086961	Promoter (<=1kb)	121493382	121495319	1938	-	ENSBGRG00000019940	ENSBGRT00000036632	121493382	121495319	1938	-	ENSBGRG00000019940	ENSBGRT00000036632	-486	FZD1	frizzled class receptor 1 [Source:HGNC Symbol;Acc:HGNC:4038]	Human Diseases;Human Diseases;Human Diseases;Human Diseases;Environmental Information Processing;Human Diseases;Human Diseases;Environmental Information Processing;Environmental Information Processing;Human Diseases;Human Diseases;Cellular Processes;Organismal Systems;Human Diseases	Cancers;Neurodegenerative diseases;Infectious diseases;Cancers;Signal transduction;Cancers;Cancers;Signal transduction;Signal transduction;Endocrine and metabolic diseases;Cancers;Cellular community - eukaryotes;Endocrine system;Cancers	ko05200//Pathways in cancer;ko05010//Alzheimer disease;ko05165//Human papillomavirus infection;ko05205//Proteoglycans in cancer;ko04390//Hippo signaling pathway;ko05226//Gastric cancer;ko05225//Hepatocellular carcinoma;ko04150//mTOR signaling pathway;ko04310//Wnt signaling pathway;ko04934//Cushing syndrome;ko05224//Breast cancer;ko04550//Signaling pathways regulating pluripotency of stem cells;ko…	K02432;K02432;K02432;K02432;K02432;K02432;K02432;K02432;K02432;K02432;K02432;K02432;K02432;K02432	GO:0009986//cell surface;GO:0016020//membrane;GO:0016021//integral component of membrane	GO:0004888//transmembrane signaling receptor activity;GO:0005102//signaling receptor binding;GO:0005109//frizzled binding;GO:0005515//protein binding;GO:0017147//Wnt-protein binding;GO:0030165//PDZ domain binding;GO:0042813//Wnt-activated receptor activity	GO:0007166//cell surface receptor signaling pathway;GO:0007267//cell-cell signaling;GO:0016055//Wnt signaling pathway;GO:0035425//autocrine signaling;GO:0042493//response to drug;GO:0044338//canonical Wnt signaling pathway involved in mesenchymal stem cell differentiation;GO:0044339//canonical Wnt signaling pathway involved in osteoblast differentiation;GO:0045893//positive regulation of transcri…
MergePeak_17079	X	118672555	118672859	0.0219	0.144	2693	3079	2859	890	1201	1953	161.540000	317.030000	470.570000	68.970000	80.360000	192.530000	316.380000	113.950000	-1.473257	Downstream (<1kb)	118673105	118673323	219	-	ENSBGRG00000008563	ENSBGRT00000015580	118673105	118673323	219	-	ENSBGRG00000008563	ENSBGRT00000015580	616	--	BAE89224.1 unnamed protein product [Macaca fascicularis]	-	-	-	-	-	-	-
MergePeak_6586	19	65210136	65210812	0.022	0.144	53	45	67	38	23	41	1.430000	2.080000	4.960000	1.320000	0.690000	1.820000	2.820000	1.280000	-1.139551	5' UTR	65210429	65274314	63886	+	ENSBGRG00000019889	ENSBGRT00000036570	65210429	65241823	31395	+	ENSBGRG00000019889	ENSBGRT00000036706	45	MMD	monocyte to macrophage differentiation associated [Source:HGNC Symbol;Acc:HGNC:7153]	-	-	-	-	GO:0005794//Golgi apparatus;GO:0016021//integral component of membrane	GO:0004672//protein kinase activity	GO:0019835//cytolysis;GO:0032880//regulation of protein localization;GO:0045666//positive regulation of neuron differentiation;GO:0045860//positive regulation of protein kinase activity
MergePeak_13802	6	3336223	3336764	0.0225	0.146	88	29	40	37	21	31	2.970000	1.680000	3.700000	1.610000	0.790000	1.720000	2.780000	1.370000	-1.020909	5' UTR	3230685	3337116	106432	-	ENSBGRG00000014564	ENSBGRT00000026843	3230685	3337116	106432	-	ENSBGRG00000014564	ENSBGRT00000026843	623	ADD1	adducin 1 [Source:HGNC Symbol;Acc:HGNC:243]	-	-	-	-	GO:0005634//nucleus;GO:0005654//nucleoplasm;GO:0005737//cytoplasm;GO:0005856//cytoskeleton;GO:0005886//plasma membrane;GO:0005912//adherens junction;GO:0008290//F-actin capping protein complex;GO:0016020//membrane;GO:0016604//nuclear body	GO:0005200//structural constituent of cytoskeleton;GO:0008134//transcription factor binding;GO:0030507//spectrin binding;GO:0042803//protein homodimerization activity;GO:0046982//protein heterodimerization activity;GO:0051015//actin filament binding	GO:0000902//cell morphogenesis;GO:0001701//in utero embryonic development;GO:0006884//cell volume homeostasis;GO:0020027//hemoglobin metabolic process;GO:0030218//erythrocyte differentiation;GO:0032092//positive regulation of protein binding;GO:0035264//multicellular organism growth;GO:0048873//homeostasis of number of cells within a tissue;GO:0051016//barbed-end actin filament capping;GO:0051017…
MergePeak_8082	20	67638269	67638794	0.0229	0.147	114	44	72	65	24	46	3.960000	2.620000	6.860000	2.920000	0.930000	2.630000	4.480000	2.160000	-1.052467	Promoter (<=1kb)	67638554	67659771	21218	+	ENSBGRG00000025551	ENSBGRT00000047242	67638554	67658449	19896	+	ENSBGRG00000025551	ENSBGRT00000047262	-23	SIRT2	sirtuin 2 [Source:HGNC Symbol;Acc:HGNC:10886]	Metabolism;Metabolism	Global and overview maps;Metabolism of cofactors and vitamins	ko01100//Metabolic pathways;ko00760//Nicotinate and nicotinamide metabolism	K11412;K11412	GO:0005634//nucleus;GO:0005694//chromosome;GO:0005730//nucleolus;GO:0005737//cytoplasm;GO:0005739//mitochondrion;GO:0005813//centrosome;GO:0005814//centriole;GO:0005819//spindle;GO:0005829//cytosol;GO:0005874//microtubule;GO:0005886//plasma membrane;GO:0030496//midbody;GO:0033010//paranodal junction;GO:0043204//perikaryon;GO:0043209//myelin sheath;GO:0043220//Schmidt-Lanterman incisure;GO:0048471…	GO:0003682//chromatin binding;GO:0003950//NAD+ ADP-ribosyltransferase activity;GO:0004407//histone deacetylase activity;GO:0008134//transcription factor binding;GO:0008270//zinc ion binding;GO:0017136//NAD-dependent histone deacetylase activity;GO:0033558//protein deacetylase activity;GO:0034979//NAD-dependent protein deacetylase activity;GO:0035035//histone acetyltransferase binding;GO:0042826//…	GO:0000122//negative regulation of transcription by RNA polymerase II;GO:0006471//protein ADP-ribosylation;GO:0006476//protein deacetylation;GO:0008285//negative regulation of cell proliferation;GO:0010507//negative regulation of autophagy;GO:0010801//negative regulation of peptidyl-threonine phosphorylation;GO:0014065//phosphatidylinositol 3-kinase signaling;GO:0016575//histone deacetylation;GO:…
MergePeak_16566	9	65605558	65606380	0.0239	0.148	87	32	63	43	39	35	1.930000	1.220000	3.830000	1.230000	0.970000	1.280000	2.330000	1.160000	-1.006205	Exon (ENSBGRT00000014860/ENSBGRG00000007889, exon 1 of 17)	65605866	65686528	80663	+	ENSBGRG00000007889	ENSBGRT00000014860	65605866	65686528	80663	+	ENSBGRG00000007889	ENSBGRT00000014860	103	GCFC2	GC-rich sequence DNA-binding factor 2 [Source:HGNC Symbol;Acc:HGNC:1317]	-	-	-	-	GO:0005634//nucleus;GO:0005654//nucleoplasm;GO:0005730//nucleolus;GO:0005829//cytosol;GO:0071008//U2-type post-mRNA release spliceosomal complex	GO:0000978//RNA polymerase II proximal promoter sequence-specific DNA binding;GO:0001227//DNA-binding transcription repressor activity, RNA polymerase II-specific;GO:0003677//DNA binding;GO:0003700//DNA-binding transcription factor activity	GO:0000122//negative regulation of transcription by RNA polymerase II;GO:0000245//spliceosomal complex assembly;GO:0006355//regulation of transcription, DNA-templated
MergePeak_13161	5	45574321	45575121	0.0251	0.15	64	57	60	45	26	45	1.460000	2.230000	3.750000	1.330000	0.660000	1.690000	2.480000	1.230000	-1.011682	Exon (ENSBGRT00000012455/ENSBGRG00000006730, exon 1 of 9)	45559630	45574862	15233	-	ENSBGRG00000006730	ENSBGRT00000012455	45559630	45574862	15233	-	ENSBGRG00000006730	ENSBGRT00000012455	141	AMDHD1	amidohydrolase domain containing 1 [Source:HGNC Symbol;Acc:HGNC:28577]	Metabolism;Metabolism	Global and overview maps;Amino acid metabolism	ko01100//Metabolic pathways;ko00340//Histidine metabolism	K01468;K01468	GO:0005737//cytoplasm	GO:0016787//hydrolase activity;GO:0016810//hydrolase activity, acting on carbon-nitrogen (but not peptide) bonds;GO:0016812//hydrolase activity, acting on carbon-nitrogen (but not peptide) bonds, in cyclic amides	GO:0019556//histidine catabolic process to glutamate and formamide
MergePeak_5232	17	73698991	73699511	0.0253	0.15	64	46	42	51	31	17	2.240000	2.770000	4.040000	2.310000	1.210000	0.980000	3.020000	1.500000	-1.009586	5' UTR	73698692	73706096	7405	+	ENSBGRG00000023240	ENSBGRT00000042948	73698692	73706096	7405	+	ENSBGRG00000023240	ENSBGRT00000042948	559	EIF5	eukaryotic translation initiation factor 5 [Source:HGNC Symbol;Acc:HGNC:3299]	Genetic Information Processing;Cellular Processes	Translation;Cell growth and death	ko03013//RNA transport;ko04214//Apoptosis - fly	K03262;K03262	GO:0005737//cytoplasm;GO:0005829//cytosol;GO:0005886//plasma membrane	GO:0003743//translation initiation factor activity;GO:0005515//protein binding	GO:0006413//translational initiation;GO:0006446//regulation of translational initiation
MergePeak_12118	3	117791811	117792250	0.0258	0.152	45	32	62	38	20	29	1.870000	2.280000	7.070000	2.040000	0.930000	1.980000	3.740000	1.650000	-1.180572	Promoter (<=1kb)	117775053	117791749	16697	-	ENSBGRG00000005350	ENSBGRT00000009938	117776261	117791749	15489	-	ENSBGRG00000005350	ENSBGRT00000010046	-281	UTP11	UTP11 small subunit processome component [Source:HGNC Symbol;Acc:HGNC:24329]	-	-	-	-	GO:0005615//extracellular space;GO:0005730//nucleolus;GO:0005737//cytoplasm;GO:0032040//small-subunit processome	-	GO:0006364//rRNA processing;GO:0007399//nervous system development;GO:0043065//positive regulation of apoptotic process
MergePeak_1631	11	16258433	16259051	0.0259	0.152	83	35	64	48	29	38	2.450000	1.770000	5.180000	1.830000	0.950000	1.840000	3.130000	1.540000	-1.023232	Promoter (<=1kb)	16258924	16310092	51169	+	ENSBGRG00000006363	ENSBGRT00000011715	16258924	16310092	51169	+	ENSBGRG00000006363	ENSBGRT00000011715	-182	WDR41	WD repeat domain 41 [Source:HGNC Symbol;Acc:HGNC:25601]	Cellular Processes	Transport and catabolism	ko04140//Autophagy - animal	K23610	GO:0005737//cytoplasm;GO:0032045//guanyl-nucleotide exchange factor complex;GO:1990316//Atg1/ULK1 kinase complex	GO:0005515//protein binding;GO:0017112//Rab guanyl-nucleotide exchange factor activity	GO:0010506//regulation of autophagy
MergePeak_11344	3	1519352	1519727	0.0263	0.153	61	44	55	46	25	33	2.970000	3.670000	7.340000	2.890000	1.360000	2.640000	4.660000	2.300000	-1.018696	Promoter (<=1kb)	1519763	1523129	3367	+	ENSBGRG00000009345	ENSBGRT00000017205	1519763	1523129	3367	+	ENSBGRG00000009345	ENSBGRT00000017205	-224	CKS1B	CDC28 protein kinase regulatory subunit 1B [Source:HGNC Symbol;Acc:HGNC:19083]	Human Diseases;Human Diseases	Cancers;Cancers	ko05200//Pathways in cancer;ko05222//Small cell lung cancer	K02219;K02219	-	GO:0016538//cyclin-dependent protein serine/threonine kinase regulator activity	-
MergePeak_9994	26	50625	51120	0.0269	0.153	42	52	38	34	27	26	1.550000	3.290000	3.840000	1.620000	1.110000	1.570000	2.890000	1.430000	-1.015054	Promoter (<=1kb)	35446	50429	14984	-	ENSBGRG00000018324	ENSBGRT00000033638	35446	50429	14984	-	ENSBGRG00000018324	ENSBGRT00000033638	-443	SRRT	serrate, RNA effector molecule [Source:HGNC Symbol;Acc:HGNC:24101]	-	-	-	-	GO:0005654//nucleoplasm;GO:0005737//cytoplasm;GO:0032991//protein-containing complex	GO:0003676//nucleic acid binding;GO:0003677//DNA binding	GO:0006355//regulation of transcription, DNA-templated;GO:0006397//mRNA processing;GO:0031053//primary miRNA processing;GO:0050769//positive regulation of neurogenesis;GO:0097150//neuronal stem cell population maintenance
MergePeak_11963	3	98763310	98763746	0.0269	0.153	471	622	510	194	204	380	19.700000	44.650000	58.530000	10.480000	9.520000	26.120000	40.960000	15.370000	-1.414099	Promoter (<=1kb)	98763565	98763828	264	+	ENSBGRG00000000687	ENSBGRT00000001230	98763565	98763828	264	+	ENSBGRG00000000687	ENSBGRT00000001230	-37	MT-ATP6	YP_001260504.1 ATP synthase F0 subunit 6 [Ammotragus lervia]	Metabolism;Human Diseases;Human Diseases;Organismal Systems;Metabolism;Human Diseases	Global and overview maps;Neurodegenerative diseases;Neurodegenerative diseases;Environmental adaptation;Energy metabolism;Neurodegenerative diseases	ko01100//Metabolic pathways;ko05010//Alzheimer disease;ko05016//Huntington disease;ko04714//Thermogenesis;ko00190//Oxidative phosphorylation;ko05012//Parkinson disease	K02126;K02126;K02126;K02126;K02126;K02126	GO:0045263//proton-transporting ATP synthase complex, coupling factor F(o)	GO:0015078//proton transmembrane transporter activity	GO:0015986//ATP synthesis coupled proton transport
MergePeak_7365	2	130006545	130007233	0.0274	0.153	59	39	59	32	27	41	1.560000	1.770000	4.290000	1.100000	0.800000	1.790000	2.540000	1.230000	-1.046170	Promoter (<=1kb)	130007519	130025762	18244	+	ENSBGRG00000000848	ENSBGRT00000001537	130007519	130025762	18244	+	ENSBGRG00000000848	ENSBGRT00000001537	-630	PLEKHA3	pleckstrin homology domain containing A3 [Source:HGNC Symbol;Acc:HGNC:14338]	-	-	-	-	GO:0005794//Golgi apparatus	GO:0070273//phosphatidylinositol-4-phosphate binding	-
MergePeak_14649	7	32432912	32433369	0.0274	0.153	57	29	50	29	26	31	2.270000	1.990000	5.470000	1.490000	1.160000	2.030000	3.240000	1.560000	-1.054448	Promoter (<=1kb)	32433575	32694006	260432	+	ENSBGRG00000001497	ENSBGRT00000002747	32433575	32631624	198050	+	ENSBGRG00000001497	ENSBGRT00000002836	-435	SLC44A1	solute carrier family 44 member 1 [Source:HGNC Symbol;Acc:HGNC:18798]	Human Diseases	Cancers	ko05231//Choline metabolism in cancer	K06515	GO:0005654//nucleoplasm;GO:0005739//mitochondrion;GO:0005829//cytosol;GO:0005886//plasma membrane;GO:0016021//integral component of membrane	GO:0015220//choline transmembrane transporter activity	GO:0015871//choline transport;GO:0055085//transmembrane transport
MergePeak_15414	8	19511996	19512383	0.0275	0.153	43	38	52	18	20	40	2.030000	3.070000	6.720000	1.100000	1.050000	3.100000	3.940000	1.750000	-1.170841	Exon (ENSBGRT00000004684/ENSBGRG00000002405, exon 14 of 22)	19487636	19545476	57841	-	ENSBGRG00000002405	ENSBGRT00000004684	19487636	19545476	57841	-	ENSBGRG00000002405	ENSBGRT00000004684	33287	SAFB	DAA27914.1 TPA: scaffold attachment factor B-like [Bos taurus]	-	-	-	-	-	GO:0003676//nucleic acid binding	GO:0006355//regulation of transcription, DNA-templated;GO:0050684//regulation of mRNA processing
MergePeak_3665	14	47331114	47331663	0.028	0.153	64	48	53	27	18	50	2.130000	2.740000	4.830000	1.160000	0.670000	2.730000	3.230000	1.520000	-1.087463	Promoter (<=1kb)	47326914	47331059	4146	-	ENSBGRG00000021077	ENSBGRT00000038984	47326914	47331059	4146	-	ENSBGRG00000021077	ENSBGRT00000039013	-329	TPRG1L	tumor protein p63 regulated 1 like [Source:HGNC Symbol;Acc:HGNC:27007]	-	-	-	-	-	GO:0042802//identical protein binding	-
MergePeak_16533	9	58674695	58675327	0.0282	0.154	90	34	57	41	21	44	2.600000	1.680000	4.510000	1.530000	0.680000	2.090000	2.930000	1.430000	-1.034886	Intron (ENSBGRT00000030299/ENSBGRG00000016097, intron 25 of 40)	58401315	58721246	319932	+	ENSBGRG00000016097	ENSBGRT00000030299	58401315	58721246	319932	+	ENSBGRG00000016097	ENSBGRT00000030299	273696	EML6	EMAP like 6 [Source:HGNC Symbol;Acc:HGNC:35412]	-	-	-	-	-	GO:0005515//protein binding	-
MergePeak_6910	2	32037489	32038191	0.0286	0.154	97	21	43	35	41	20	2.520000	0.940000	3.060000	1.170000	1.190000	0.850000	2.170000	1.070000	-1.020084	Intron (ENSBGRT00000035228/ENSBGRG00000018601, intron 6 of 23)	32030748	32055462	24715	+	ENSBGRG00000018601	ENSBGRT00000035228	32030748	32055462	24715	+	ENSBGRG00000018601	ENSBGRT00000035228	7092	OBSL1	obscurin like cytoskeletal adaptor 1 [Source:HGNC Symbol;Acc:HGNC:29092]	-	-	-	-	GO:0005737//cytoplasm;GO:0005794//Golgi apparatus;GO:0005813//centrosome;GO:0048471//perinuclear region of cytoplasm;GO:1990393//3M complex	GO:0005515//protein binding	GO:0000226//microtubule cytoskeleton organization;GO:0007030//Golgi organization;GO:0007088//regulation of mitotic nuclear division;GO:0034067//protein localization to Golgi apparatus;GO:0050775//positive regulation of dendrite morphogenesis
MergePeak_13703	5	120506656	120507045	0.0288	0.154	42	47	49	33	24	33	1.970000	3.780000	6.300000	2.000000	1.250000	2.540000	4.020000	1.930000	-1.058595	Intron (ENSBGRT00000011615/ENSBGRG00000006304, intron 1 of 2)	120505649	120510839	5191	+	ENSBGRG00000006304	ENSBGRT00000011615	120505649	120510839	5191	+	ENSBGRG00000006304	ENSBGRT00000011615	1201	RBX1	XP_004397484.1 PREDICTED: E3 ubiquitin-protein ligase RBX1 isoform X2 [Odobenus rosmarus divergens]	Human Diseases;Human Diseases;Human Diseases;Genetic Information Processing;Genetic Information Processing;Environmental Information Processing;Cellular Processes;Cellular Processes;Environmental Information Processing;Environmental Information Processing;Human Diseases;Genetic Information Processing;Environmental Information Processing;Organismal Systems	Cancers;Infectious disease: viral;Infectious diseases;Folding, sorting and degradation;Folding, sorting and degradation;Signal transduction;Cell growth and death;Cell growth and death;Signal transduction;Signal transduction;Cancers;Replication and repair;Signal transduction;Environmental adaptation	ko05200//Pathways in cancer;ko05170//Human immunodeficiency virus 1 infection;ko05131//Shigellosis;ko04141//Protein processing in endoplasmic reticulum;ko04120//Ubiquitin mediated proteolysis;ko04310//Wnt signaling pathway;ko04110//Cell cycle;ko04114//Oocyte meiosis;ko04066//HIF-1 signaling pathway;ko04350//TGF-beta signaling pathway;ko05211//Renal cell carcinoma;ko03420//Nucleotide excision repa…	K03868;K03868;K03868;K03868;K03868;K03868;K03868;K03868;K03868;K03868;K03868;K03868;K03868;K03868	-	GO:0008270//zinc ion binding	-
MergePeak_4040	15	8906159	8906746	0.0304	0.158	58	26	50	31	27	28	1.800000	1.390000	4.260000	1.240000	0.940000	1.430000	2.480000	1.200000	-1.047306	Intron (ENSBGRT00000043128/ENSBGRG00000023354, intron 1 of 6)	8899092	9156538	257447	+	ENSBGRG00000023354	ENSBGRT00000043128	8899092	9156538	257447	+	ENSBGRG00000023354	ENSBGRT00000043128	7360	CLYBL	citrate lyase beta like [Source:HGNC Symbol;Acc:HGNC:18355]	-	-	-	-	-	GO:0000287//magnesium ion binding;GO:0003824//catalytic activity;GO:0004474//malate synthase activity;GO:0047777//(3S)-citramalyl-CoA lyase activity	GO:0070207//protein homotrimerization;GO:0106064//regulation of cobalamin metabolic process;GO:0106121//positive regulation of cobalamin metabolic process
MergePeak_8837	22	55994696	55995480	0.0308	0.158	71	35	56	31	28	43	1.650000	1.400000	3.570000	0.930000	0.730000	1.640000	2.210000	1.100000	-1.006543	Promoter (<=1kb)	55880336	55994625	114290	-	ENSBGRG00000014575	ENSBGRT00000026856	55936629	55994625	57997	-	ENSBGRG00000014786	ENSBGRT00000027206	-463	Golga4	XP_005695604.2 PREDICTED: golgin subfamily A member 4 isoform X5 [Capra hircus]	-	-	-	-	-	-	-
MergePeak_11962	3	98762475	98762847	0.0309	0.158	472	536	438	173	196	365	23.140000	45.100000	58.910000	10.960000	10.720000	29.410000	42.380000	17.030000	-1.315305	Promoter (<=1kb)	98763565	98763828	264	+	ENSBGRG00000000687	ENSBGRT00000001230	98763565	98763828	264	+	ENSBGRG00000000687	ENSBGRT00000001230	-904	MT-ATP6	YP_001260504.1 ATP synthase F0 subunit 6 [Ammotragus lervia]	Metabolism;Human Diseases;Human Diseases;Organismal Systems;Metabolism;Human Diseases	Global and overview maps;Neurodegenerative diseases;Neurodegenerative diseases;Environmental adaptation;Energy metabolism;Neurodegenerative diseases	ko01100//Metabolic pathways;ko05010//Alzheimer disease;ko05016//Huntington disease;ko04714//Thermogenesis;ko00190//Oxidative phosphorylation;ko05012//Parkinson disease	K02126;K02126;K02126;K02126;K02126;K02126	GO:0045263//proton-transporting ATP synthase complex, coupling factor F(o)	GO:0015078//proton transmembrane transporter activity	GO:0015986//ATP synthesis coupled proton transport
MergePeak_12043	3	110249514	110249845	0.0327	0.162	61	27	49	42	22	23	3.360000	2.550000	7.410000	2.990000	1.350000	2.080000	4.440000	2.140000	-1.052949	Promoter (<=1kb)	110241730	110248939	7210	-	ENSBGRG00000003693	ENSBGRT00000006876	110241730	110248939	7210	-	ENSBGRG00000003693	ENSBGRT00000006927	-740	BTBD19	BTB domain containing 19 [Source:HGNC Symbol;Acc:HGNC:27145]	-	-	-	-	-	GO:0005515//protein binding	-
MergePeak_13784	6	553029	553344	0.0344	0.164	74	34	54	57	29	20	4.280000	3.380000	8.580000	4.260000	1.870000	1.900000	5.410000	2.680000	-1.013396	Promoter (<=1kb)	536964	553062	16099	-	ENSBGRG00000006663	ENSBGRT00000012280	537873	553062	15190	-	ENSBGRG00000006663	ENSBGRT00000012302	-124	GRPEL1	GrpE like 1, mitochondrial [Source:HGNC Symbol;Acc:HGNC:19696]	-	-	-	-	GO:0005654//nucleoplasm;GO:0005739//mitochondrion;GO:0005759//mitochondrial matrix	GO:0000774//adenyl-nucleotide exchange factor activity;GO:0042803//protein homodimerization activity;GO:0051082//unfolded protein binding;GO:0051087//chaperone binding	GO:0006457//protein folding
MergePeak_4674	16	63969103	63969701	0.0359	0.166	51	33	62	44	23	30	1.560000	1.730000	5.190000	1.730000	0.780000	1.500000	2.830000	1.340000	-1.078569	Intron (ENSBGRT00000022359/ENSBGRG00000012215, intron 2 of 12)	63944195	64007220	63026	+	ENSBGRG00000012215	ENSBGRT00000022359	63944195	64007220	63026	+	ENSBGRG00000012215	ENSBGRT00000022359	25207	FBXO21	F-box protein 21 [Source:HGNC Symbol;Acc:HGNC:13592]	-	-	-	-	-	GO:0003677//DNA binding;GO:0005515//protein binding	-
MergePeak_7758	20	47520346	47520812	0.0362	0.166	73	38	46	38	15	40	2.860000	2.550000	4.940000	1.920000	0.650000	2.570000	3.450000	1.710000	-1.012600	Intron (ENSBGRT00000046389/ENSBGRG00000025047, intron 1 of 13)	47520499	47536206	15708	+	ENSBGRG00000025047	ENSBGRT00000046389	47520499	47536206	15708	+	ENSBGRG00000025047	ENSBGRT00000046389	80	KARS1	lysyl-tRNA synthetase 1 [Source:HGNC Symbol;Acc:HGNC:6215]	Genetic Information Processing	Translation	ko00970//Aminoacyl-tRNA biosynthesis	K04567	GO:0005615//extracellular space;GO:0005634//nucleus;GO:0005737//cytoplasm;GO:0005739//mitochondrion;GO:0005829//cytosol;GO:0017101//aminoacyl-tRNA synthetase multienzyme complex	GO:0000166//nucleotide binding;GO:0003676//nucleic acid binding;GO:0003877//ATP adenylyltransferase activity;GO:0004812//aminoacyl-tRNA ligase activity;GO:0004824//lysine-tRNA ligase activity;GO:0005524//ATP binding;GO:0042802//identical protein binding;GO:0042803//protein homodimerization activity	GO:0000187//activation of MAPK activity;GO:0002276//basophil activation involved in immune response;GO:0002741//positive regulation of cytokine secretion involved in immune response;GO:0006418//tRNA aminoacylation for protein translation;GO:0006430//lysyl-tRNA aminoacylation;GO:0008285//negative regulation of cell proliferation;GO:0010759//positive regulation of macrophage chemotaxis;GO:0015966//…
MergePeak_3900	14	83025555	83025810	0.0375	0.168	321	362	316	122	161	256	22.960000	44.440000	62.010000	11.270000	12.840000	30.090000	43.140000	18.070000	-1.255430	Promoter (<=1kb)	83025024	83025417	394	-	ENSBGRG00000026277	ENSBGRT00000048627	83025024	83025417	394	-	ENSBGRG00000026277	ENSBGRT00000048627	-265	--	KAB0396420.1 hypothetical protein E2I00_012062, partial [Balaenoptera physalus]	-	-	-	-	-	-	-
MergePeak_5547	18	21169252	21169566	0.0375	0.168	45	30	57	36	32	24	2.610000	2.990000	9.080000	2.700000	2.070000	2.290000	4.890000	2.350000	-1.057174	Promoter (<=1kb)	21169585	21172525	2941	+	ENSBGRG00000012410	ENSBGRT00000022679	21169585	21172525	2941	+	ENSBGRG00000012410	ENSBGRT00000022679	-176	HGH1	HGH1 homolog [Source:HGNC Symbol;Acc:HGNC:24161]	-	-	-	-	-	-	-
MergePeak_5603	18	33993704	33994106	0.0389	0.17	72	27	44	46	17	24	3.270000	2.100000	5.480000	2.700000	0.860000	1.790000	3.620000	1.780000	-1.024112	Intron (ENSBGRT00000034963/ENSBGRG00000019051, intron 1 of 7)	33918459	34091704	173246	-	ENSBGRG00000019051	ENSBGRT00000034963	33918459	34091704	173246	-	ENSBGRG00000019051	ENSBGRT00000034963	97799	PAG1	phosphoprotein membrane anchor with glycosphingolipid microdomains 1 [Source:HGNC Symbol;Acc:HGNC:30043]	-	-	-	-	GO:0005886//plasma membrane;GO:0045121//membrane raft	GO:0042169//SH2 domain binding	GO:0035556//intracellular signal transduction;GO:0050863//regulation of T cell activation;GO:0050868//negative regulation of T cell activation
MergePeak_8090	20	68112654	68113216	0.0391	0.17	138	46	94	63	25	47	4.480000	2.560000	8.370000	2.640000	0.900000	2.510000	5.140000	2.020000	-1.347413	Promoter (<=1kb)	68101973	68112600	10628	-	ENSBGRG00000026632	ENSBGRT00000049354	68101973	68112600	10628	-	ENSBGRG00000026632	ENSBGRT00000049354	-335	SPRED3	sprouty related EVH1 domain containing 3 [Source:HGNC Symbol;Acc:HGNC:31041]	-	-	-	-	GO:0016020//membrane	-	GO:0007275//multicellular organism development;GO:0009966//regulation of signal transduction
MergePeak_2932	13	28702806	28703354	0.0418	0.174	35	45	56	39	24	31	1.160000	2.570000	5.110000	1.680000	0.890000	1.700000	2.950000	1.420000	-1.054824	Intron (ENSBGRT00000017425/ENSBGRG00000009273, intron 3 of 11)	28685469	28726326	40858	+	ENSBGRG00000009273	ENSBGRT00000017425	28685469	28726326	40858	+	ENSBGRG00000009273	ENSBGRT00000017425	17611	CRY2	cryptochrome circadian regulator 2 [Source:HGNC Symbol;Acc:HGNC:2385]	Organismal Systems	Environmental adaptation	ko04710//Circadian rhythm	K02295	GO:0005634//nucleus;GO:0005739//mitochondrion;GO:0005829//cytosol;GO:0016607//nuclear speck	GO:0000976//transcription regulatory region sequence-specific DNA binding;GO:0019900//kinase binding;GO:0019901//protein kinase binding;GO:0035257//nuclear hormone receptor binding;GO:0071949//FAD binding	GO:0006606//protein import into nucleus;GO:0007623//circadian rhythm;GO:0009416//response to light stimulus;GO:0014823//response to activity;GO:0019915//lipid storage;GO:0032868//response to insulin;GO:0032922//circadian regulation of gene expression;GO:0042593//glucose homeostasis;GO:0042752//regulation of circadian rhythm;GO:0042754//negative regulation of circadian rhythm;GO:0043153//entrainme…
MergePeak_1345	10	90350640	90350910	0.0446	0.178	100	119	107	39	41	85	6.750000	13.800000	19.830000	3.400000	3.090000	9.430000	13.460000	5.310000	-1.341895	Promoter (<=1kb)	90350884	90351222	339	+	ENSBGRG00000022824	ENSBGRT00000042129	90350884	90351222	339	+	ENSBGRG00000022824	ENSBGRT00000042129	-109	--	-	-	-	-	-	-	-	-
MergePeak_4009	15	5099564	5099998	0.0449	0.179	39	45	47	18	28	40	1.640000	3.250000	5.420000	0.980000	1.310000	2.760000	3.440000	1.680000	-1.033947	Promoter (<=1kb)	5099881	5168026	68146	+	ENSBGRG00000020313	ENSBGRT00000037499	5099881	5168026	68146	+	ENSBGRG00000020313	ENSBGRT00000037499	-100	DNAJC3	DnaJ heat shock protein family (Hsp40) member C3 [Source:HGNC Symbol;Acc:HGNC:9439]	Genetic Information Processing;Human Diseases	Folding, sorting and degradation;Infectious diseases	ko04141//Protein processing in endoplasmic reticulum;ko05164//Influenza A	K09523;K09523	GO:0005737//cytoplasm;GO:0005783//endoplasmic reticulum;GO:0005788//endoplasmic reticulum lumen;GO:0005829//cytosol	GO:0004860//protein kinase inhibitor activity;GO:0005515//protein binding;GO:0019901//protein kinase binding;GO:0051087//chaperone binding;GO:0051787//misfolded protein binding	GO:0034976//response to endoplasmic reticulum stress;GO:0036494//positive regulation of translation initiation in response to endoplasmic reticulum stress;GO:0043066//negative regulation of apoptotic process;GO:0051603//proteolysis involved in cellular protein catabolic process;GO:0070417//cellular response to cold;GO:1903912//negative regulation of endoplasmic reticulum stress-induced eIF2 alpha…
MergePeak_14456	7	5538177	5538549	0.0465	0.181	60	22	51	27	22	35	2.940000	1.850000	6.860000	1.710000	1.200000	2.820000	3.880000	1.910000	-1.022484	Intron (ENSBGRT00000025164/ENSBGRG00000013709, intron 2 of 12)	5477315	5567370	90056	-	ENSBGRG00000013709	ENSBGRT00000025164	5477315	5567370	90056	-	ENSBGRG00000013709	ENSBGRT00000025164	29007	LOXL2	lysyl oxidase like 2 [Source:HGNC Symbol;Acc:HGNC:6666]	-	-	-	-	GO:0000785//chromatin;GO:0005615//extracellular space;GO:0005634//nucleus;GO:0005654//nucleoplasm;GO:0005783//endoplasmic reticulum;GO:0016020//membrane	GO:0004720//protein-lysine 6-oxidase activity;GO:0005044//scavenger receptor activity;GO:0005507//copper ion binding;GO:0005509//calcium ion binding;GO:0016641//oxidoreductase activity, acting on the CH-NH2 group of donors, oxygen as acceptor;GO:0070492//oligosaccharide binding	GO:0000122//negative regulation of transcription by RNA polymerase II;GO:0001666//response to hypoxia;GO:0001837//epithelial to mesenchymal transition;GO:0001935//endothelial cell proliferation;GO:0002040//sprouting angiogenesis;GO:0006464//cellular protein modification process;GO:0010718//positive regulation of epithelial to mesenchymal transition;GO:0018057//peptidyl-lysine oxidation;GO:0030199…
MergePeak_3647	14	44285568	44285854	3.57e-05	1	43	39	37	17	13	7	2.740000	4.270000	6.470000	1.400000	0.920000	0.730000	4.490000	1.020000	-2.138146	Promoter (<=1kb)	44280343	44285534	5192	-	ENSBGRG00000014625	ENSBGRT00000026881	44280343	44285534	5192	-	ENSBGRG00000014625	ENSBGRT00000026881	-177	THAP3	THAP domain containing 3 [Source:HGNC Symbol;Acc:HGNC:20855]	-	-	-	-	-	GO:0003676//nucleic acid binding	-
MergePeak_8237	21	24284242	24284559	0.000112	1	65	27	29	16	15	9	3.740000	2.670000	4.580000	1.190000	0.960000	0.850000	3.660000	1.000000	-1.871844	Intron (ENSBGRT00000044276/ENSBGRG00000023975, intron 2 of 16)	24178992	24455597	276606	+	ENSBGRG00000023975	ENSBGRT00000044276	24178992	24455597	276606	+	ENSBGRG00000023975	ENSBGRT00000044276	105408	CDH2	cadherin 2 [Source:HGNC Symbol;Acc:HGNC:1759]	Environmental Information Processing;Human Diseases	Signaling molecules and interaction;Cardiovascular diseases	ko04514//Cell adhesion molecules (CAMs);ko05412//Arrhythmogenic right ventricular cardiomyopathy (ARVC)	K06736;K06736	GO:0005886//plasma membrane;GO:0016020//membrane	GO:0005509//calcium ion binding	GO:0007155//cell adhesion;GO:0007156//homophilic cell adhesion via plasma membrane adhesion molecules;GO:0009966//regulation of signal transduction;GO:0098609//cell-cell adhesion
MergePeak_16168	9	14729370	14729739	0.000121	1	62	30	28	10	23	5	3.060000	2.540000	3.800000	0.640000	1.270000	0.410000	3.130000	0.770000	-2.023232	Intron (ENSBGRT00000009564/ENSBGRG00000005191, intron 1 of 10)	14719582	14830409	110828	+	ENSBGRG00000005191	ENSBGRT00000009564	14719582	14830409	110828	+	ENSBGRG00000005191	ENSBGRT00000009564	9972	RXRA	retinoid X receptor alpha [Source:HGNC Symbol;Acc:HGNC:10477]	Human Diseases;Environmental Information Processing;Human Diseases;Human Diseases;Human Diseases;Organismal Systems;Human Diseases;Organismal Systems;Organismal Systems;Human Diseases;Organismal Systems;Organismal Systems;Organismal Systems;Human Diseases;Human Diseases	Cancers;Signal transduction;Cancers;Endocrine and metabolic diseases;Cancers;Immune system;Infectious diseases;Endocrine system;Endocrine system;Cancers;Endocrine system;Digestive system;Endocrine system;Cancers;Cancers	ko05200//Pathways in cancer;ko04151//PI3K-Akt signaling pathway;ko05202//Transcriptional misregulation in cancers;ko04932//Non-alcoholic fatty liver disease (NAFLD);ko05226//Gastric cancer;ko04659//Th17 cell differentiation;ko05160//Hepatitis C;ko04919//Thyroid hormone signaling pathway;ko04928//Parathyroid hormone synthesis, secretion and action;ko05222//Small cell lung cancer;ko03320//PPAR sign…	K08524;K08524;K08524;K08524;K08524;K08524;K08524;K08524;K08524;K08524;K08524;K08524;K08524;K08524;K08524	GO:0000790//nuclear chromatin;GO:0005634//nucleus;GO:0032991//protein-containing complex;GO:0043235//receptor complex;GO:0090575//RNA polymerase II transcription factor complex	GO:0000977//RNA polymerase II regulatory region sequence-specific DNA binding;GO:0000978//RNA polymerase II proximal promoter sequence-specific DNA binding;GO:0001162//RNA polymerase II intronic transcription regulatory region sequence-specific DNA binding;GO:0001972//retinoic acid binding;GO:0003677//DNA binding;GO:0003690//double-stranded DNA binding;GO:0003700//DNA-binding transcription factor…	GO:0000122//negative regulation of transcription by RNA polymerase II;GO:0001701//in utero embryonic development;GO:0001890//placenta development;GO:0001893//maternal placenta development;GO:0006355//regulation of transcription, DNA-templated;GO:0006357//regulation of transcription by RNA polymerase II;GO:0007507//heart development;GO:0007566//embryo implantation;GO:0019048//modulation by virus o…
MergePeak_12146	3	120182368	120182877	0.000131	1	45	51	35	18	20	12	1.610000	3.140000	3.440000	0.830000	0.800000	0.710000	2.730000	0.780000	-1.807355	Intron (ENSBGRT00000019261/ENSBGRG00000010482, intron 1 of 24)	120182095	120212906	30812	+	ENSBGRG00000010482	ENSBGRT00000019261	120182095	120212906	30812	+	ENSBGRG00000010482	ENSBGRT00000019261	527	CLSPN	claspin [Source:HGNC Symbol;Acc:HGNC:19715]	-	-	-	-	GO:0005634//nucleus;GO:0005654//nucleoplasm;GO:0005794//Golgi apparatus	GO:0000217//DNA secondary structure binding;GO:0010997//anaphase-promoting complex binding	GO:0000076//DNA replication checkpoint;GO:0000077//DNA damage checkpoint;GO:0007095//mitotic G2 DNA damage checkpoint;GO:0018105//peptidyl-serine phosphorylation;GO:0032147//activation of protein kinase activity;GO:0033314//mitotic DNA replication checkpoint
MergePeak_1637	11	17650247	17650623	0.000182	1	69	40	37	22	8	19	3.350000	3.330000	4.920000	1.380000	0.430000	1.510000	3.870000	1.110000	-1.801774	Intron (ENSBGRT00000015717/ENSBGRG00000008621, intron 1 of 12)	17438967	17751584	312618	-	ENSBGRG00000008621	ENSBGRT00000015717	17438967	17751584	312618	-	ENSBGRG00000008621	ENSBGRT00000015717	101149	SV2C	synaptic vesicle glycoprotein 2C [Source:HGNC Symbol;Acc:HGNC:30670]	Environmental Information Processing	Signaling molecules and interaction	ko04512//ECM-receptor interaction	K06258	GO:0016020//membrane;GO:0016021//integral component of membrane	GO:0022857//transmembrane transporter activity	GO:0007268//chemical synaptic transmission;GO:0055085//transmembrane transport
MergePeak_11905	3	87756879	87757401	0.000231	1	64	32	34	21	18	11	2.240000	1.920000	3.260000	0.950000	0.700000	0.630000	2.470000	0.760000	-1.700440	Promoter (<=1kb)	87497932	87756748	258817	-	ENSBGRG00000014987	ENSBGRT00000028701	87499472	87756748	257277	-	ENSBGRG00000014987	ENSBGRT00000029878	-392	CACHD1	cache domain containing 1 [Source:HGNC Symbol;Acc:HGNC:29314]	-	-	-	-	-	-	-
MergePeak_14213	6	104719488	104719807	0.000248	1	41	25	21	9	10	7	2.340000	2.450000	3.290000	0.660000	0.640000	0.660000	2.690000	0.650000	-2.049095	Intron (ENSBGRT00000006060/ENSBGRG00000003214, intron 7 of 16)	104639395	104769721	130327	-	ENSBGRG00000003214	ENSBGRT00000006060	104639395	104769721	130327	-	ENSBGRG00000003214	ENSBGRT00000006060	50074	MANBA	mannosidase beta [Source:HGNC Symbol;Acc:HGNC:6831]	Cellular Processes;Metabolism	Transport and catabolism;Glycan biosynthesis and metabolism	ko04142//Lysosome;ko00511//Other glycan degradation	K01192;K01192	GO:0043231//intracellular membrane-bounded organelle	GO:0004553//hydrolase activity, hydrolyzing O-glycosyl compounds;GO:0004567//beta-mannosidase activity	GO:0005975//carbohydrate metabolic process
MergePeak_4658	16	61032996	61033391	0.000311	1	55	32	33	16	15	15	2.540000	2.540000	4.180000	0.950000	0.770000	1.140000	3.090000	0.950000	-1.701607	Intron (ENSBGRT00000027404/ENSBGRG00000014406, intron 1 of 23)	60925016	61034694	109679	-	ENSBGRG00000014406	ENSBGRT00000027404	60925016	61034694	109679	-	ENSBGRG00000014406	ENSBGRT00000027404	1501	ATXN2	ataxin 2 [Source:HGNC Symbol;Acc:HGNC:10555]	Human Diseases;Organismal Systems	Neurodegenerative disease;Environmental adaptation	ko05017//Spinocerebellar ataxia;ko04711//Circadian rhythm - fly	K23625;K23625	GO:0005737//cytoplasm;GO:0005794//Golgi apparatus;GO:0005802//trans-Golgi network;GO:0005829//cytosol;GO:0005844//polysome;GO:0010494//cytoplasmic stress granule;GO:0048471//perinuclear region of cytoplasm;GO:1990904//ribonucleoprotein complex	GO:0005154//epidermal growth factor receptor binding;GO:0008022//protein C-terminus binding	GO:0002091//negative regulation of receptor internalization;GO:0033962//cytoplasmic mRNA processing body assembly;GO:0034063//stress granule assembly
MergePeak_9180	24	3100712	3100957	0.000341	1	44	24	18	7	6	10	3.270000	3.070000	3.680000	0.670000	0.500000	1.220000	3.340000	0.800000	-2.061776	Promoter (<=1kb)	3100282	3100692	411	-	ENSBGRG00000015411	ENSBGRT00000028279	3100282	3100692	411	-	ENSBGRG00000015411	ENSBGRT00000028279	-142	H3C1	XP_016048653.1 PREDICTED: uncharacterized protein LOC103123927 [Erinaceus europaeus]	Human Diseases;Human Diseases;Human Diseases;Human Diseases	Infectious diseases;Cancers;Immune diseases;Substance dependence	ko05131//Shigellosis;ko05202//Transcriptional misregulation in cancers;ko05322//Systemic lupus erythematosus;ko05034//Alcoholism	K11253;K11253;K11253;K11253	GO:0000786//nucleosome	GO:0003677//DNA binding;GO:0046982//protein heterodimerization activity	-
MergePeak_4516	16	31906571	31906836	0.00035	1	42	24	28	13	6	10	2.890000	2.830000	5.290000	1.160000	0.460000	1.130000	3.670000	0.920000	-1.996074	Intron (ENSBGRT00000009719/ENSBGRG00000005261, intron 1 of 10)	31843726	31909769	66044	-	ENSBGRG00000005261	ENSBGRT00000009719	31843726	31909769	66044	-	ENSBGRG00000005261	ENSBGRT00000009719	3066	JADE1	jade family PHD finger 1 [Source:HGNC Symbol;Acc:HGNC:30027]	-	-	-	-	GO:0000123//histone acetyltransferase complex;GO:0005634//nucleus;GO:0005737//cytoplasm;GO:0005886//plasma membrane;GO:0016607//nuclear speck;GO:0036064//ciliary basal body	GO:0003713//transcription coactivator activity	GO:0043966//histone H3 acetylation;GO:0043981//histone H4-K5 acetylation;GO:0043982//histone H4-K8 acetylation;GO:0043983//histone H4-K12 acetylation;GO:0090090//negative regulation of canonical Wnt signaling pathway;GO:2000134//negative regulation of G1/S transition of mitotic cell cycle
MergePeak_11766	3	58331194	58331643	0.000442	1	50	21	37	13	12	13	2.030000	1.460000	4.120000	0.680000	0.540000	0.870000	2.540000	0.700000	-1.859402	Intron (ENSBGRT00000004615/ENSBGRG00000002473, intron 2 of 3)	58314549	58416010	101462	-	ENSBGRG00000002473	ENSBGRT00000004615	58314549	58416010	101462	-	ENSBGRG00000002473	ENSBGRT00000004615	84592	LRRC8C	leucine rich repeat containing 8 VRAC subunit C [Source:HGNC Symbol;Acc:HGNC:25075]	-	-	-	-	GO:0005737//cytoplasm;GO:0005783//endoplasmic reticulum;GO:0005886//plasma membrane;GO:0005887//integral component of plasma membrane;GO:0034702//ion channel complex	GO:0005225//volume-sensitive anion channel activity;GO:0005515//protein binding	GO:0034214//protein hexamerization;GO:0045444//fat cell differentiation;GO:0098656//anion transmembrane transport
MergePeak_1926	11	55717663	55717970	0.000476	1	60	43	27	16	24	15	3.560000	4.380000	4.400000	1.230000	1.590000	1.460000	4.110000	1.430000	-1.523123	Intron (ENSBGRT00000044149/ENSBGRG00000023839, intron 1 of 8)	55603513	55828842	225330	+	ENSBGRG00000023839	ENSBGRT00000044149	55603513	55828842	225330	+	ENSBGRG00000023839	ENSBGRT00000044149	114303	SAMD4A	sterile alpha motif domain containing 4A [Source:HGNC Symbol;Acc:HGNC:23023]	-	-	-	-	GO:0001650//fibrillar center;GO:0005829//cytosol;GO:0030054//cell junction;GO:0045202//synapse	GO:0003723//RNA binding;GO:0005515//protein binding;GO:0030371//translation repressor activity	GO:0017148//negative regulation of translation;GO:0043488//regulation of mRNA stability;GO:0045727//positive regulation of translation
MergePeak_4337	15	70340607	70341128	0.000509	1	86	36	34	23	32	11	3.010000	2.160000	3.270000	1.040000	1.250000	0.630000	2.810000	0.970000	-1.534513	Intron (ENSBGRT00000008274/ENSBGRG00000004490, intron 1 of 15)	70185059	70775812	590754	+	ENSBGRG00000004490	ENSBGRT00000008274	70185059	70775812	590754	+	ENSBGRG00000004490	ENSBGRT00000008274	155808	ENOX1	ecto-NOX disulfide-thiol exchanger 1 [Source:HGNC Symbol;Acc:HGNC:25474]	-	-	-	-	GO:0005886//plasma membrane;GO:0009897//external side of plasma membrane	GO:0003676//nucleic acid binding;GO:0016491//oxidoreductase activity	GO:0007624//ultradian rhythm
MergePeak_17024	X	93227730	93228203	0.00051	1	50	39	40	18	22	16	1.930000	2.580000	4.230000	0.900000	0.950000	1.010000	2.910000	0.950000	-1.615020	Intron (ENSBGRT00000027623/ENSBGRG00000014621, intron 3 of 22)	93226114	93242471	16358	+	ENSBGRG00000014621	ENSBGRT00000027623	93226114	93242471	16358	+	ENSBGRG00000014621	ENSBGRT00000027623	1852	USP11	XP_005228139.1 ubiquitin carboxyl-terminal hydrolase 11 isoform X3 [Bos taurus]	-	-	-	-	-	GO:0004843//thiol-dependent ubiquitin-specific protease activity;GO:0036459//thiol-dependent ubiquitinyl hydrolase activity	GO:0006511//ubiquitin-dependent protein catabolic process;GO:0016579//protein deubiquitination
MergePeak_7621	20	24017494	24017882	0.000511	1	50	20	24	9	17	2	2.350000	1.610000	3.100000	0.550000	0.890000	0.150000	2.350000	0.530000	-2.148596	Intron (ENSBGRT00000044391/ENSBGRG00000023889, intron 1 of 12)	23988324	24018902	30579	-	ENSBGRG00000023889	ENSBGRT00000044391	23988324	24018902	30579	-	ENSBGRG00000023889	ENSBGRT00000044391	1214	MMP2	matrix metallopeptidase 2 [Source:HGNC Symbol;Acc:HGNC:7166]	Human Diseases;Human Diseases;Organismal Systems;Human Diseases;Organismal Systems;Organismal Systems;Human Diseases;Organismal Systems;Human Diseases;Human Diseases	Cancers;Cancers;Immune system;Cardiovascular diseases;Endocrine system;Endocrine system;Endocrine and metabolic diseases;Endocrine system;Drug resistance;Cancers	ko05200//Pathways in cancer;ko05205//Proteoglycans in cancer;ko04670//Leukocyte transendothelial migration;ko05418//Fluid shear stress and atherosclerosis;ko04915//Estrogen signaling pathway;ko04926//Relaxin signaling pathway;ko04933//AGE-RAGE signaling pathway in diabetic complications;ko04912//GnRH signaling pathway;ko01522//Endocrine resistance;ko05219//Bladder cancer	K01398;K01398;K01398;K01398;K01398;K01398;K01398;K01398;K01398;K01398	GO:0005615//extracellular space;GO:0005886//plasma membrane;GO:0030017//sarcomere;GO:0031012//extracellular matrix	GO:0004175//endopeptidase activity;GO:0004222//metalloendopeptidase activity;GO:0008237//metallopeptidase activity;GO:0008270//zinc ion binding	GO:0001666//response to hypoxia;GO:0001955//blood vessel maturation;GO:0001957//intramembranous ossification;GO:0006508//proteolysis;GO:0007566//embryo implantation;GO:0030574//collagen catabolic process;GO:0034614//cellular response to reactive oxygen species;GO:0035987//endodermal cell differentiation;GO:0048661//positive regulation of smooth muscle cell proliferation;GO:0048705//skeletal syste…
MergePeak_1679	11	24870176	24870577	0.000562	1	7	1	1	14	34	26	0.320000	0.080000	0.120000	0.820000	1.720000	1.940000	0.170000	1.490000	3.131706	Intron (ENSBGRT00000027359/ENSBGRG00000014150, intron 1 of 17)	24647744	24991656	343913	-	ENSBGRG00000014150	ENSBGRT00000027359	24647744	24991656	343913	-	ENSBGRG00000014150	ENSBGRT00000027359	121280	MCC	MCC regulator of WNT signaling pathway [Source:HGNC Symbol;Acc:HGNC:6935]	-	-	-	-	GO:0005634//nucleus;GO:0005654//nucleoplasm;GO:0005737//cytoplasm;GO:0005829//cytosol;GO:0005886//plasma membrane;GO:0036464//cytoplasmic ribonucleoprotein granule	GO:0005509//calcium ion binding	GO:0010633//negative regulation of epithelial cell migration;GO:0045184//establishment of protein localization;GO:0050680//negative regulation of epithelial cell proliferation;GO:0090090//negative regulation of canonical Wnt signaling pathway
MergePeak_5766	18	64907044	64907472	0.000579	1	71	44	30	12	20	25	3.030000	3.220000	3.510000	0.660000	0.950000	1.750000	3.250000	1.120000	-1.536941	Intron (ENSBGRT00000018951/ENSBGRG00000010331, intron 1 of 10)	64845424	65014151	168728	+	ENSBGRG00000010331	ENSBGRT00000018951	64845424	65014151	168728	+	ENSBGRG00000010331	ENSBGRT00000018951	61834	RUNX1T1	RUNX1 partner transcriptional co-repressor 1 [Source:HGNC Symbol;Acc:HGNC:1535]	Human Diseases;Human Diseases;Human Diseases	Cancers;Cancers;Cancers	ko05200//Pathways in cancer;ko05202//Transcriptional misregulation in cancers;ko05221//Acute myeloid leukemia	K10053;K10053;K10053	GO:0005654//nucleoplasm	GO:0003700//DNA-binding transcription factor activity;GO:0003714//transcription corepressor activity	GO:0006355//regulation of transcription, DNA-templated;GO:0045892//negative regulation of transcription, DNA-templated
MergePeak_13823	6	5544599	5544980	0.000592	1	60	36	21	16	18	12	2.870000	2.960000	2.760000	0.990000	0.960000	0.940000	2.860000	0.960000	-1.574909	Promoter (<=1kb)	5545013	5570694	25682	+	ENSBGRG00000021798	ENSBGRT00000040602	5545013	5566375	21363	+	ENSBGRG00000021798	ENSBGRT00000040711	-224	QDPR	quinoid dihydropteridine reductase [Source:HGNC Symbol;Acc:HGNC:9752]	Metabolism;Metabolism	Global and overview maps;Metabolism of cofactors and vitamins	ko01100//Metabolic pathways;ko00790//Folate biosynthesis	K00357;K00357	GO:0005737//cytoplasm	GO:0016491//oxidoreductase activity	-
MergePeak_12488	4	44852284	44852702	0.000603	1	82	40	23	20	26	14	3.580000	3.000000	2.750000	1.130000	1.270000	1.000000	3.110000	1.130000	-1.460592	Intron (ENSBGRT00000017863/ENSBGRG00000009720, intron 9 of 16)	44818966	45151247	332282	-	ENSBGRG00000009720	ENSBGRT00000017863	44818966	45151247	332282	-	ENSBGRG00000009720	ENSBGRT00000017863	298754	GLI3	GLI family zinc finger 3 [Source:HGNC Symbol;Acc:HGNC:4319]	Human Diseases;Environmental Information Processing;Human Diseases;Environmental Information Processing	Cancers;Signal transduction;Cancers;Signal transduction	ko05200//Pathways in cancer;ko04024//cAMP signaling pathway;ko05217//Basal cell carcinoma;ko04340//Hedgehog signaling pathway	K06230;K06230;K06230;K06230	GO:0005634//nucleus;GO:0005737//cytoplasm;GO:0005829//cytosol;GO:0005929//cilium;GO:0005930//axoneme;GO:0016607//nuclear speck;GO:0017053//transcriptional repressor complex	GO:0000977//RNA polymerase II regulatory region sequence-specific DNA binding;GO:0000978//RNA polymerase II proximal promoter sequence-specific DNA binding;GO:0003676//nucleic acid binding;GO:0003682//chromatin binding;GO:0003700//DNA-binding transcription factor activity;GO:0008013//beta-catenin binding;GO:0035035//histone acetyltransferase binding;GO:0036033//mediator complex binding;GO:0042826…	GO:0000122//negative regulation of transcription by RNA polymerase II;GO:0001656//metanephros development;GO:0001658//branching involved in ureteric bud morphogenesis;GO:0001701//in utero embryonic development;GO:0001822//kidney development;GO:0002052//positive regulation of neuroblast proliferation;GO:0006355//regulation of transcription, DNA-templated;GO:0007224//smoothened signaling pathway;GO…
MergePeak_13693	5	119925192	119925730	0.00062	1	66	52	33	17	24	25	2.240000	3.030000	3.070000	0.740000	0.910000	1.390000	2.780000	1.010000	-1.460730	Intron (ENSBGRT00000014011/ENSBGRG00000007053, intron 17 of 21)	119743192	119931868	188677	+	ENSBGRG00000007053	ENSBGRT00000014011	119743192	119931868	188677	+	ENSBGRG00000007053	ENSBGRT00000014011	182269	TNRC6B	trinucleotide repeat containing adaptor 6B [Source:HGNC Symbol;Acc:HGNC:29190]	-	-	-	-	-	GO:0003676//nucleic acid binding	GO:0031047//gene silencing by RNA;GO:0035278//miRNA mediated inhibition of translation;GO:0060213//positive regulation of nuclear-transcribed mRNA poly(A) tail shortening;GO:1900153//positive regulation of nuclear-transcribed mRNA catabolic process, deadenylation-dependent decay
MergePeak_8373	21	46804065	46804479	0.000623	1	34	26	29	13	11	8	1.500000	1.970000	3.500000	0.740000	0.540000	0.580000	2.320000	0.620000	-1.903785	Intron (ENSBGRT00000042212/ENSBGRG00000022704, intron 7 of 15)	46493653	46895633	401981	-	ENSBGRG00000022704	ENSBGRT00000042212	46493653	46895633	401981	-	ENSBGRG00000022704	ENSBGRT00000042212	91361	DYM	dymeclin [Source:HGNC Symbol;Acc:HGNC:21317]	-	-	-	-	GO:0005737//cytoplasm;GO:0005794//Golgi apparatus	GO:0019899//enzyme binding	GO:0007030//Golgi organization;GO:0060348//bone development
MergePeak_2104	11	78542527	78542958	0.000627	1	60	46	39	23	16	23	2.540000	3.340000	4.530000	1.260000	0.760000	1.600000	3.470000	1.210000	-1.519929	Intron (ENSBGRT00000019280/ENSBGRG00000010484, intron 5 of 6)	78335606	78563805	228200	+	ENSBGRG00000010484	ENSBGRT00000019280	78335606	78563805	228200	+	ENSBGRG00000010484	ENSBGRT00000019280	207136	ESRRB	estrogen related receptor beta [Source:HGNC Symbol;Acc:HGNC:3473]	Cellular Processes	Cellular community - eukaryotes	ko04550//Signaling pathways regulating pluripotency of stem cells	K08553	GO:0005634//nucleus	GO:0003677//DNA binding;GO:0003700//DNA-binding transcription factor activity;GO:0003707//steroid hormone receptor activity;GO:0005496//steroid binding;GO:0008270//zinc ion binding;GO:0043565//sequence-specific DNA binding	GO:0006355//regulation of transcription, DNA-templated;GO:0019827//stem cell population maintenance
MergePeak_1330	10	80912681	80913044	0.000681	1	50	33	35	11	23	15	2.510000	2.850000	4.820000	0.710000	1.290000	1.240000	3.390000	1.080000	-1.650254	Promoter (<=1kb)	80913153	80993704	80552	+	ENSBGRG00000008882	ENSBGRT00000016241	80913153	80991223	78071	+	ENSBGRG00000008882	ENSBGRT00000016340	-291	SLC17A5	solute carrier family 17 member 5 [Source:HGNC Symbol;Acc:HGNC:10933]	Cellular Processes	Transport and catabolism	ko04142//Lysosome	K12301	GO:0005765//lysosomal membrane;GO:0005829//cytosol;GO:0005886//plasma membrane;GO:0031410//cytoplasmic vesicle	GO:0015136//sialic acid transmembrane transporter activity	GO:0009617//response to bacterium;GO:0015739//sialic acid transport;GO:0055085//transmembrane transport
MergePeak_5043	17	35737423	35737913	0.00073	1	81	29	49	24	14	24	3.010000	1.850000	5.000000	1.150000	0.580000	1.470000	3.290000	1.070000	-1.620477	Intron (ENSBGRT00000046148/ENSBGRG00000024994, intron 2 of 5)	35697637	35745384	47748	-	ENSBGRG00000024994	ENSBGRT00000046148	35697637	35745384	47748	-	ENSBGRG00000024994	ENSBGRT00000046148	7716	PPCDC	phosphopantothenoylcysteine decarboxylase [Source:HGNC Symbol;Acc:HGNC:28107]	Metabolism;Metabolism	Global and overview maps;Metabolism of cofactors and vitamins	ko01100//Metabolic pathways;ko00770//Pantothenate and CoA biosynthesis	K01598;K01598	-	GO:0003824//catalytic activity;GO:0004633//phosphopantothenoylcysteine decarboxylase activity;GO:0042802//identical protein binding	GO:0015937//coenzyme A biosynthetic process
MergePeak_525	1	104434414	104434716	0.000738	1	66	41	34	21	26	18	3.990000	4.250000	5.630000	1.640000	1.750000	1.790000	4.620000	1.730000	-1.417121	Intron (ENSBGRT00000013241/ENSBGRG00000004855, intron 1 of 2)	104371886	104490606	118721	+	ENSBGRG00000004855	ENSBGRT00000013241	104371886	104490606	118721	+	ENSBGRG00000004855	ENSBGRT00000013241	62679	TNIK	TRAF2 and NCK interacting kinase [Source:HGNC Symbol;Acc:HGNC:30765]	Environmental Information Processing	Signal transduction	ko04013//MAPK signaling pathway - fly	K08840	GO:0005634//nucleus;GO:0005654//nucleoplasm;GO:0005737//cytoplasm;GO:0005829//cytosol;GO:0005856//cytoskeleton;GO:0016324//apical plasma membrane	GO:0004672//protein kinase activity;GO:0004674//protein serine/threonine kinase activity;GO:0005524//ATP binding	GO:0001934//positive regulation of protein phosphorylation;GO:0006468//protein phosphorylation;GO:0007010//cytoskeleton organization;GO:0007256//activation of JNKK activity;GO:0030033//microvillus assembly;GO:0031532//actin cytoskeleton reorganization;GO:0035556//intracellular signal transduction;GO:0046777//protein autophosphorylation;GO:0048814//regulation of dendrite morphogenesis;GO:0072659//…
MergePeak_5198	17	69823279	69823770	0.000798	1	56	27	28	15	15	14	2.080000	1.720000	2.850000	0.720000	0.620000	0.850000	2.220000	0.730000	-1.604591	Intron (ENSBGRT00000036444/ENSBGRG00000019819, intron 8 of 10)	69791841	69830655	38815	+	ENSBGRG00000019819	ENSBGRT00000036444	69791841	69830655	38815	+	ENSBGRG00000019819	ENSBGRT00000036444	31683	HHIPL1	HHIP like 1 [Source:HGNC Symbol;Acc:HGNC:19710]	-	-	-	-	-	GO:0003824//catalytic activity	-
MergePeak_6340	19	40913767	40914025	0.000825	1	46	31	29	19	10	12	3.250000	3.760000	5.620000	1.730000	0.790000	1.390000	4.210000	1.300000	-1.695309	Intron (ENSBGRT00000035239/ENSBGRG00000018985, intron 2 of 12)	40905025	40915396	10372	-	ENSBGRG00000018985	ENSBGRT00000035239	40905025	40915396	10372	-	ENSBGRG00000018985	ENSBGRT00000035239	1500	CHRNB1	cholinergic receptor nicotinic beta 1 subunit [Source:HGNC Symbol;Acc:HGNC:1961]	Environmental Information Processing	Signaling molecules and interaction	ko04080//Neuroactive ligand-receptor interaction	K04812	GO:0005886//plasma membrane;GO:0005892//acetylcholine-gated channel complex;GO:0016021//integral component of membrane;GO:0031594//neuromuscular junction;GO:0045202//synapse;GO:0045211//postsynaptic membrane;GO:0099060//integral component of postsynaptic specialization membrane	GO:0004888//transmembrane signaling receptor activity;GO:0005216//ion channel activity;GO:0005230//extracellular ligand-gated ion channel activity;GO:0015267//channel activity;GO:0015464//acetylcholine receptor activity;GO:0022848//acetylcholine-gated cation-selective channel activity;GO:0042166//acetylcholine binding;GO:1904315//transmitter-gated ion channel activity involved in regulation of po…	GO:0001941//postsynaptic membrane organization;GO:0006811//ion transport;GO:0006812//cation transport;GO:0006936//muscle contraction;GO:0007165//signal transduction;GO:0007271//synaptic transmission, cholinergic;GO:0007274//neuromuscular synaptic transmission;GO:0034220//ion transmembrane transport;GO:0035095//behavioral response to nicotine;GO:0042391//regulation of membrane potential;GO:0048747…
MergePeak_16776	9	97367382	97367967	0.000849	1	50	37	52	22	26	16	1.560000	1.980000	4.450000	0.890000	0.900000	0.820000	2.660000	0.870000	-1.612339	Intron (ENSBGRT00000019640/ENSBGRG00000010740, intron 1 of 5)	97355776	97373026	17251	-	ENSBGRG00000010740	ENSBGRT00000019640	97355776	97373026	17251	-	ENSBGRG00000010740	ENSBGRT00000019640	5352	SLC35F6	solute carrier family 35 member F6 [Source:HGNC Symbol;Acc:HGNC:26055]	-	-	-	-	GO:0005654//nucleoplasm;GO:0005739//mitochondrion;GO:0005764//lysosome;GO:0005765//lysosomal membrane;GO:0005829//cytosol;GO:0016021//integral component of membrane;GO:0043231//intracellular membrane-bounded organelle	GO:0022857//transmembrane transporter activity	GO:0008284//positive regulation of cell proliferation;GO:0055085//transmembrane transport;GO:1901029//negative regulation of mitochondrial outer membrane permeabilization involved in apoptotic signaling pathway
MergePeak_13165	5	45733071	45733534	0.000897	1	67	39	39	25	24	19	2.640000	2.640000	4.210000	1.270000	1.050000	1.230000	3.160000	1.180000	-1.421138	Intron (ENSBGRT00000013295/ENSBGRG00000007052, intron 3 of 9)	45677774	45822147	144374	+	ENSBGRG00000007052	ENSBGRT00000013295	45677774	45822147	144374	+	ENSBGRG00000007052	ENSBGRT00000013295	55528	NTN4	netrin 4 [Source:HGNC Symbol;Acc:HGNC:13658]	Organismal Systems	Development	ko04360//Axon guidance	K06845	-	GO:0005515//protein binding	-
MergePeak_1286	10	69926283	69926665	0.000924	1	53	21	38	13	24	7	2.530000	1.720000	4.980000	0.800000	1.280000	0.550000	3.080000	0.880000	-1.807355	Intron (ENSBGRT00000027770/ENSBGRG00000015027, intron 12 of 13)	69695259	69932015	236757	+	ENSBGRG00000015027	ENSBGRT00000027770	69695259	69932015	236757	+	ENSBGRG00000015027	ENSBGRT00000027770	231215	ME1	malic enzyme 1 [Source:HGNC Symbol;Acc:HGNC:6983]	Metabolism;Metabolism;Organismal Systems;Metabolism	Global and overview maps;Global and overview maps;Endocrine system;Carbohydrate metabolism	ko01100//Metabolic pathways;ko01200//Carbon metabolism;ko03320//PPAR signaling pathway;ko00620//Pyruvate metabolism	K00029;K00029;K00029;K00029	-	GO:0004470//malic enzyme activity;GO:0004471//malate dehydrogenase (decarboxylating) (NAD+) activity;GO:0004473//malate dehydrogenase (decarboxylating) (NADP+) activity;GO:0030145//manganese ion binding;GO:0051287//NAD binding	GO:0006108//malate metabolic process;GO:0055114//oxidation-reduction process;GO:1902031//regulation of NADP metabolic process
MergePeak_570	1	116899548	116900041	0.000951	1	72	34	34	16	26	20	2.660000	2.160000	3.450000	0.760000	1.070000	1.220000	2.760000	1.020000	-1.436099	Intron (ENSBGRT00000024227/ENSBGRG00000013199, intron 5 of 15)	116875748	116917778	42031	+	ENSBGRG00000013199	ENSBGRT00000024227	116875748	116917778	42031	+	ENSBGRG00000013199	ENSBGRT00000024227	24046	--	XP_010838202.1 PREDICTED: uncharacterized protein LOC104988541 [Bison bison bison]	-	-	-	-	-	GO:0005515//protein binding	GO:0007165//signal transduction
MergePeak_4857	17	5029747	5030099	0.00104	1	33	28	21	8	9	11	1.710000	2.490000	2.990000	0.540000	0.520000	0.940000	2.400000	0.670000	-1.840801	Intron (ENSBGRT00000008804/ENSBGRG00000004770, intron 10 of 10)	4877690	5063311	185622	+	ENSBGRG00000004770	ENSBGRT00000008804	4877690	5063311	185622	+	ENSBGRG00000004770	ENSBGRT00000008804	152233	CERS3	ceramide synthase 3 [Source:HGNC Symbol;Acc:HGNC:23752]	Metabolism;Environmental Information Processing;Metabolism	Global and overview maps;Signal transduction;Lipid metabolism	ko01100//Metabolic pathways;ko04071//Sphingolipid signaling pathway;ko00600//Sphingolipid metabolism	K04710;K04710;K04710	GO:0005783//endoplasmic reticulum;GO:0016021//integral component of membrane	GO:0003677//DNA binding;GO:0050291//sphingosine N-acyltransferase activity	GO:0008544//epidermis development;GO:0030148//sphingolipid biosynthetic process;GO:0030216//keratinocyte differentiation;GO:0046513//ceramide biosynthetic process;GO:0070268//cornification
[truncated: 827 more rows]
