# Supplementary material for: The Landscape of Accessible Chromatin during Yak Adipocyte Differentiation
Source: Int J Mol Sci. 2022 Sep 1;23(17):9960. doi: 10.3390/ijms23179960 (PMC9456067; doi:10.3390/ijms23179960)
Supplement: Supplementary file 1 [file ijms-23-09960-s001.zip › Supplementary Table S4.xls]

GO ID (level1)	GO Term (level1)	GO ID (level2)	GO Term (level2)	number_of_Pread-vs-Ad (All)
GO:0008150	Biological Process	GO:0071840	cellular component organization or biogenesis	327
GO:0008150	Biological Process	GO:0048518	positive regulation of biological process	316
GO:0008150	Biological Process	GO:0032501	multicellular organismal process	348
GO:0008150	Biological Process	GO:0048519	negative regulation of biological process	274
GO:0008150	Biological Process	GO:0032502	developmental process	301
GO:0008150	Biological Process	GO:0009987	cellular process	812
GO:0008150	Biological Process	GO:0008152	metabolic process	589
GO:0008150	Biological Process	GO:0051179	localization	310
GO:0008150	Biological Process	GO:0040011	locomotion	101
GO:0008150	Biological Process	GO:0022610	biological adhesion	67
GO:0008150	Biological Process	GO:0040007	growth	50
GO:0008150	Biological Process	GO:0065007	biological regulation	589
GO:0008150	Biological Process	GO:0050789	regulation of biological process	559
GO:0008150	Biological Process	GO:0008283	cell proliferation	92
GO:0008150	Biological Process	GO:0048511	rhythmic process	15
GO:0008150	Biological Process	GO:0007610	behavior	32
GO:0008150	Biological Process	GO:0043473	pigmentation	7
GO:0008150	Biological Process	GO:0019740	nitrogen utilization	1
GO:0008150	Biological Process	GO:0050896	response to stimulus	401
GO:0008150	Biological Process	GO:0002376	immune system process	104
GO:0008150	Biological Process	GO:0044848	biological phase	1
GO:0008150	Biological Process	GO:0023052	signaling	288
GO:0008150	Biological Process	GO:0098754	detoxification	2
GO:0008150	Biological Process	GO:0022414	reproductive process	49
GO:0008150	Biological Process	GO:0000003	reproduction	49
GO:0008150	Biological Process	GO:0051704	multi-organism process	75
GO:0008150	Biological Process	GO:0001906	cell killing	2
GO:0003674	Molecular Function	GO:0005488	binding	762
GO:0003674	Molecular Function	GO:0140110	transcription regulator activity	97
GO:0003674	Molecular Function	GO:0003824	catalytic activity	346
GO:0003674	Molecular Function	GO:0045182	translation regulator activity	5
GO:0003674	Molecular Function	GO:0005215	transporter activity	66
GO:0003674	Molecular Function	GO:0098772	molecular function regulator	79
GO:0003674	Molecular Function	GO:0140104	molecular carrier activity	2
GO:0003674	Molecular Function	GO:0038024	cargo receptor activity	4
GO:0003674	Molecular Function	GO:0005198	structural molecule activity	34
GO:0003674	Molecular Function	GO:0016209	antioxidant activity	3
GO:0003674	Molecular Function	GO:0060089	molecular transducer activity	48
GO:0005575	Cellular Component	GO:0044464	cell part	751
GO:0005575	Cellular Component	GO:0005623	cell	751
GO:0005575	Cellular Component	GO:0043226	organelle	613
GO:0005575	Cellular Component	GO:0044422	organelle part	435
GO:0005575	Cellular Component	GO:0031974	membrane-enclosed lumen	247
GO:0005575	Cellular Component	GO:0032991	protein-containing complex	282
GO:0005575	Cellular Component	GO:0045202	synapse	53
GO:0005575	Cellular Component	GO:0030054	cell junction	42
GO:0005575	Cellular Component	GO:0044456	synapse part	34
GO:0005575	Cellular Component	GO:0044421	extracellular region part	56
GO:0005575	Cellular Component	GO:0099080	supramolecular complex	31
GO:0005575	Cellular Component	GO:0009295	nucleoid	3
GO:0005575	Cellular Component	GO:0044215	other organism	1
GO:0005575	Cellular Component	GO:0044217	other organism part	1
GO:0005575	Cellular Component	GO:0016020	membrane	325
GO:0005575	Cellular Component	GO:0005576	extracellular region	60
GO:0005575	Cellular Component	GO:0044425	membrane part	186
