# Supplementary material for: The Landscape of Accessible Chromatin during Yak Adipocyte Differentiation
Source: Int J Mol Sci. 2022 Sep 1;23(17):9960. doi: 10.3390/ijms23179960 (PMC9456067; doi:10.3390/ijms23179960)
Supplement: Supplementary file 1 [file ijms-23-09960-s001.zip › Supplementary Table S5.xls]

id	num	qvalue	per	ratio	class	ID	Descrption	Pvalue	Qvalue	fg_num	bg_num
Focal adhesion	26	0.02852811	5.068	0.133	Cellular Processes	ko04510	Focal adhesion	0.000105711	0.02852811	26	196
Axon guidance	23	0.02852811	4.483	0.136	Organismal Systems	ko04360	Axon guidance	0.000178301	0.02852811	23	169
Circadian rhythm	9	0.03396433	1.754	0.237	Organismal Systems	ko04710	Circadian rhythm	0.000318416	0.03396433	9	38
Oxytocin signaling pathway	19	0.07507434	3.704	0.132	Organismal Systems	ko04921	Oxytocin signaling pathway	0.000938429	0.07507434	19	144
Wnt signaling pathway	19	0.1475424	3.704	0.121	Environmental Information Processing	ko04310	Wnt signaling pathway	0.002615458	0.1475424	19	157
Regulation of actin cytoskeleton	23	0.1475424	4.483	0.111	Cellular Processes	ko04810	Regulation of actin cytoskeleton	0.003212352	0.1475424	23	208
Adherens junction	14	0.1475424	2.729	0.136	Cellular Processes	ko04520	Adherens junction	0.00322749	0.1475424	14	103
Protein processing in endoplasmic reticulum	20	0.22253228	3.899	0.11	Genetic Information Processing	ko04141	Protein processing in endoplasmic reticulum	0.005839863	0.22253228	20	181
Metabolic pathways	114	0.22253228	22.222	0.074	Metabolism	ko01100	Metabolic pathways	0.006935448	0.22253228	114	1539
Shigellosis	26	0.22253228	5.068	0.099	Human Diseases	ko05131	Shigellosis	0.007661542	0.22253228	26	262
Glioma	10	0.22253228	1.949	0.143	Human Diseases	ko05214	Glioma	0.008476924	0.22253228	10	70
Huntington disease	29	0.22253228	5.653	0.095	Human Diseases	ko05016	Huntington disease	0.008993219	0.22253228	29	305
Parathyroid hormone synthesis, secretion and action	13	0.22253228	2.534	0.125	Organismal Systems	ko04928	Parathyroid hormone synthesis, secretion and action	0.009040374	0.22253228	13	104
Dorso-ventral axis formation	5	0.23760274	0.975	0.217	Organismal Systems	ko04320	Dorso-ventral axis formation	0.01039512	0.23760274	5	23
ECM-receptor interaction	11	0.2480118	2.144	0.129	Environmental Information Processing	ko04512	ECM-receptor interaction	0.01225696	0.2480118	11	85
Cell cycle	15	0.2480118	2.924	0.114	Cellular Processes	ko04110	Cell cycle	0.01240059	0.2480118	15	132
Phototransduction - fly	5	0.27994391	0.975	0.2	Organismal Systems	ko04745	Phototransduction - fly	0.01487202	0.27994391	5	25
Choline metabolism in cancer	11	0.3214016	2.144	0.122	Human Diseases	ko05231	Choline metabolism in cancer	0.01829522	0.3214016	11	90
PPAR signaling pathway	10	0.3214016	1.949	0.127	Organismal Systems	ko03320	PPAR signaling pathway	0.01908322	0.3214016	10	79
Aldosterone synthesis and secretion	11	0.39250496	2.144	0.117	Organismal Systems	ko04925	Aldosterone synthesis and secretion	0.02453156	0.39250496	11	94
Proteoglycans in cancer	19	0.39813959	3.704	0.096	Human Diseases	ko05205	Proteoglycans in cancer	0.02832868	0.39813959	19	198
Acute myeloid leukemia	8	0.39813959	1.559	0.129	Human Diseases	ko05221	Acute myeloid leukemia	0.03086813	0.39813959	8	62
Pantothenate and CoA biosynthesis	4	0.39813959	0.78	0.19	Metabolism	ko00770	Pantothenate and CoA biosynthesis	0.0338854	0.39813959	4	21
Peroxisome	10	0.39813959	1.949	0.115	Cellular Processes	ko04146	Peroxisome	0.03474072	0.39813959	10	87
Alzheimer disease	30	0.39813959	5.848	0.084	Human Diseases	ko05010	Alzheimer disease	0.03628758	0.39813959	30	356
MAPK signaling pathway - fly	10	0.39813959	1.949	0.114	Environmental Information Processing	ko04013	MAPK signaling pathway - fly	0.03718685	0.39813959	10	88
Biosynthesis of amino acids	9	0.39813959	1.754	0.118	Metabolism	ko01230	Biosynthesis of amino acids	0.03723179	0.39813959	9	76
Homologous recombination	6	0.39813959	1.17	0.143	Genetic Information Processing	ko03440	Homologous recombination	0.03772933	0.39813959	6	42
Oocyte meiosis	13	0.39813959	2.534	0.103	Cellular Processes	ko04114	Oocyte meiosis	0.03849971	0.39813959	13	126
Amphetamine addiction	8	0.39813959	1.559	0.123	Human Diseases	ko05031	Amphetamine addiction	0.03948028	0.39813959	8	65
Glycosaminoglycan biosynthesis - heparan sulfate / heparin	4	0.39813959	0.78	0.182	Metabolism	ko00534	Glycosaminoglycan biosynthesis - heparan sulfate / heparin	0.03951602	0.39813959	4	22
HIF-1 signaling pathway	12	0.39813959	2.339	0.104	Environmental Information Processing	ko04066	HIF-1 signaling pathway	0.04239831	0.39813959	12	115
Cellular senescence	15	0.39813959	2.924	0.097	Cellular Processes	ko04218	Cellular senescence	0.04488229	0.39813959	15	155
Fructose and mannose metabolism	5	0.39813959	0.975	0.152	Metabolism	ko00051	Fructose and mannose metabolism	0.04494391	0.39813959	5	33
Morphine addiction	10	0.39813959	1.949	0.11	Human Diseases	ko05032	Morphine addiction	0.04523429	0.39813959	10	91
Biosynthesis of unsaturated fatty acids	4	0.39813959	0.78	0.174	Metabolism	ko01040	Biosynthesis of unsaturated fatty acids	0.04564674	0.39813959	4	23
Long-term potentiation	8	0.39813959	1.559	0.119	Organismal Systems	ko04720	Long-term potentiation	0.04603489	0.39813959	8	67
Glutamatergic synapse	11	0.41612429	2.144	0.105	Organismal Systems	ko04724	Glutamatergic synapse	0.04941476	0.41612429	11	105
Other types of O-glycan biosynthesis	6	0.42520633	1.17	0.13	Metabolism	ko00514	Other types of O-glycan biosynthesis	0.05523004	0.42520633	6	46
Carbon metabolism	12	0.42520633	2.339	0.1	Metabolism	ko01200	Carbon metabolism	0.05557252	0.42520633	12	120
Hepatitis B	15	0.42520633	2.924	0.094	Human Diseases	ko05161	Hepatitis B	0.05643437	0.42520633	15	160
Glycosphingolipid biosynthesis - ganglio series	3	0.42520633	0.585	0.2	Metabolism	ko00604	Glycosphingolipid biosynthesis - ganglio series	0.056909	0.42520633	3	15
Glycerolipid metabolism	8	0.42520633	1.559	0.114	Metabolism	ko00561	Glycerolipid metabolism	0.0571371	0.42520633	8	70
AGE-RAGE signaling pathway in diabetic complications	10	0.44451796	1.949	0.104	Human Diseases	ko04933	AGE-RAGE signaling pathway in diabetic complications	0.06112122	0.44451796	10	96
Small cell lung cancer	10	0.45595636	1.949	0.103	Human Diseases	ko05222	Small cell lung cancer	0.06468318	0.45595636	10	97
Vasopressin-regulated water reabsorption	6	0.45595636	1.17	0.125	Organismal Systems	ko04962	Vasopressin-regulated water reabsorption	0.06554696	0.45595636	6	48
Purine metabolism	13	0.45595636	2.534	0.095	Metabolism	ko00230	Purine metabolism	0.06696859	0.45595636	13	137
Bacterial invasion of epithelial cells	11	0.4562554	2.144	0.099	Human Diseases	ko05100	Bacterial invasion of epithelial cells	0.06843831	0.4562554	11	111
Insulin signaling pathway	13	0.49226074	2.534	0.093	Organismal Systems	ko04910	Insulin signaling pathway	0.07665486	0.49226074	13	140
Cholesterol metabolism	6	0.49226074	1.17	0.12	Organismal Systems	ko04979	Cholesterol metabolism	0.07691574	0.49226074	6	50
Gastric acid secretion	8	0.4965206	1.559	0.107	Organismal Systems	ko04971	Gastric acid secretion	0.07913297	0.4965206	8	75
Non-small cell lung cancer	7	0.50298308	1.365	0.111	Human Diseases	ko05223	Non-small cell lung cancer	0.08173475	0.50298308	7	63
Dopaminergic synapse	12	0.53124871	2.339	0.092	Organismal Systems	ko04728	Dopaminergic synapse	0.08955291	0.53124871	12	130
Pathways in cancer	42	0.53124871	8.187	0.074	Human Diseases	ko05200	Pathways in cancer	0.08964822	0.53124871	42	568
Thyroid cancer	5	0.56206249	0.975	0.122	Human Diseases	ko05216	Thyroid cancer	0.09660449	0.56206249	5	41
Other glycan degradation	3	0.5769134	0.585	0.158	Metabolism	ko00511	Other glycan degradation	0.1017528	0.5769134	3	19
Long-term depression	6	0.5769134	1.17	0.111	Organismal Systems	ko04730	Long-term depression	0.1027627	0.5769134	6	54
Amoebiasis	11	0.57837131	2.144	0.092	Human Diseases	ko05146	Amoebiasis	0.1048298	0.57837131	11	120
GABAergic synapse	9	0.58589333	1.754	0.096	Organismal Systems	ko04727	GABAergic synapse	0.1098359	0.58589333	9	94
Valine, leucine and isoleucine degradation	6	0.58589333	1.17	0.109	Metabolism	ko00280	Valine, leucine and isoleucine degradation	0.109855	0.58589333	6	55
Endocytosis	20	0.58948026	3.899	0.08	Cellular Processes	ko04144	Endocytosis	0.1141567	0.58948026	20	250
Yersinia infection	15	0.58948026	2.924	0.084	Human Diseases	ko05135	Yersinia infection	0.1142118	0.58948026	15	178
Monobactam biosynthesis	1	0.59100343	0.195	0.5	Metabolism	ko00261	Monobactam biosynthesis	0.1163538	0.59100343	1	2
Serotonergic synapse	10	0.59822863	1.949	0.091	Organismal Systems	ko04726	Serotonergic synapse	0.1230049	0.59822863	10	110
ErbB signaling pathway	8	0.59822863	1.559	0.096	Environmental Information Processing	ko04012	ErbB signaling pathway	0.123458	0.59822863	8	83
TGF-beta signaling pathway	9	0.59822863	1.754	0.093	Environmental Information Processing	ko04350	TGF-beta signaling pathway	0.1266463	0.59822863	9	97
Spinocerebellar ataxia	9	0.59822863	1.754	0.093	Human Diseases	ko05017	Spinocerebellar ataxia	0.1266463	0.59822863	9	97
2-Oxocarboxylic acid metabolism	3	0.59822863	0.585	0.143	Metabolism	ko01210	2-Oxocarboxylic acid metabolism	0.1280934	0.59822863	3	21
Non-alcoholic fatty liver disease (NAFLD)	15	0.59822863	2.924	0.082	Human Diseases	ko04932	Non-alcoholic fatty liver disease (NAFLD)	0.1306152	0.59822863	15	182
Cholinergic synapse	10	0.59822863	1.949	0.089	Organismal Systems	ko04725	Cholinergic synapse	0.1339366	0.59822863	10	112
EGFR tyrosine kinase inhibitor resistance	8	0.59822863	1.559	0.094	Human Diseases	ko01521	EGFR tyrosine kinase inhibitor resistance	0.1362365	0.59822863	8	85
Progesterone-mediated oocyte maturation	8	0.59822863	1.559	0.094	Organismal Systems	ko04914	Progesterone-mediated oocyte maturation	0.1362365	0.59822863	8	85
Salmonella infection	18	0.59822863	3.509	0.079	Human Diseases	ko05132	Salmonella infection	0.1365326	0.59822863	18	227
Toll and Imd signaling pathway	5	0.59822863	0.975	0.109	Organismal Systems	ko04624	Toll and Imd signaling pathway	0.1394202	0.59822863	5	46
Amyotrophic lateral sclerosis (ALS)	6	0.59822863	1.17	0.102	Human Diseases	ko05014	Amyotrophic lateral sclerosis (ALS)	0.140608	0.59822863	6	59
Steroid biosynthesis	3	0.59822863	0.585	0.136	Metabolism	ko00100	Steroid biosynthesis	0.1420793	0.59822863	3	22
Renal cell carcinoma	7	0.64011345	1.365	0.095	Human Diseases	ko05211	Renal cell carcinoma	0.1540273	0.64011345	7	74
GnRH signaling pathway	8	0.64214765	1.559	0.091	Organismal Systems	ko04912	GnRH signaling pathway	0.1565975	0.64214765	8	88
VEGF signaling pathway	5	0.64214765	0.975	0.104	Environmental Information Processing	ko04370	VEGF signaling pathway	0.1585302	0.64214765	5	48
Sphingolipid metabolism	5	0.65842467	0.975	0.102	Metabolism	ko00600	Sphingolipid metabolism	0.1684654	0.65842467	5	49
Osteoclast differentiation	10	0.65842467	1.949	0.085	Organismal Systems	ko04380	Osteoclast differentiation	0.1696697	0.65842467	10	118
Parkinson disease	14	0.65842467	2.729	0.08	Human Diseases	ko05012	Parkinson disease	0.1705841	0.65842467	14	176
Glycerophospholipid metabolism	9	0.65842467	1.754	0.087	Metabolism	ko00564	Glycerophospholipid metabolism	0.1707789	0.65842467	9	104
AMPK signaling pathway	10	0.66469805	1.949	0.084	Environmental Information Processing	ko04152	AMPK signaling pathway	0.1760326	0.66469805	10	119
Amino sugar and nucleotide sugar metabolism	5	0.66469805	0.975	0.1	Metabolism	ko00520	Amino sugar and nucleotide sugar metabolism	0.1786376	0.66469805	5	50
Endocrine and other factor-regulated calcium reabsorption	5	0.66469805	0.975	0.1	Organismal Systems	ko04961	Endocrine and other factor-regulated calcium reabsorption	0.1786376	0.66469805	5	50
Primary bile acid biosynthesis	2	0.66650593	0.39	0.154	Metabolism	ko00120	Primary bile acid biosynthesis	0.1812063	0.66650593	2	13
Fc gamma R-mediated phagocytosis	9	0.671128	1.754	0.085	Organismal Systems	ko04666	Fc gamma R-mediated phagocytosis	0.1845602	0.671128	9	106
Pentose phosphate pathway	3	0.67134382	0.585	0.12	Metabolism	ko00030	Pentose phosphate pathway	0.1867175	0.67134382	3	25
Cardiac muscle contraction	9	0.69447224	1.754	0.083	Organismal Systems	ko04260	Cardiac muscle contraction	0.1988169	0.69447224	9	108
Phosphatidylinositol signaling system	8	0.69447224	1.559	0.085	Environmental Information Processing	ko04070	Phosphatidylinositol signaling system	0.2012581	0.69447224	8	94
Hepatitis C	12	0.69447224	2.339	0.078	Human Diseases	ko05160	Hepatitis C	0.2068425	0.69447224	12	153
Human papillomavirus infection	24	0.69447224	4.678	0.072	Human Diseases	ko05165	Human papillomavirus infection	0.2083219	0.69447224	24	335
MAPK signaling pathway	21	0.69447224	4.094	0.073	Environmental Information Processing	ko04010	MAPK signaling pathway	0.2085207	0.69447224	21	289
Cysteine and methionine metabolism	5	0.69447224	0.975	0.094	Metabolism	ko00270	Cysteine and methionine metabolism	0.2104453	0.69447224	5	53
Cushing syndrome	12	0.69447224	2.339	0.078	Human Diseases	ko04934	Cushing syndrome	0.2130592	0.69447224	12	154
Sphingolipid signaling pathway	9	0.69447224	1.754	0.082	Environmental Information Processing	ko04071	Sphingolipid signaling pathway	0.2135205	0.69447224	9	110
Bladder cancer	4	0.69447224	0.78	0.1	Human Diseases	ko05219	Bladder cancer	0.2166879	0.69447224	4	40
alpha-Linolenic acid metabolism	3	0.69447224	0.585	0.111	Metabolism	ko00592	alpha-Linolenic acid metabolism	0.2182341	0.69447224	3	27
D-Glutamine and D-glutamate metabolism	1	0.69447224	0.195	0.25	Metabolism	ko00471	D-Glutamine and D-glutamate metabolism	0.2191928	0.69447224	1	4
Neomycin, kanamycin and gentamicin biosynthesis	1	0.69447224	0.195	0.25	Metabolism	ko00524	Neomycin, kanamycin and gentamicin biosynthesis	0.2191928	0.69447224	1	4
Inflammatory mediator regulation of TRP channels	8	0.6980736	1.559	0.082	Organismal Systems	ko04750	Inflammatory mediator regulation of TRP channels	0.2253255	0.6980736	8	97
Glucagon signaling pathway	8	0.6980736	1.559	0.082	Organismal Systems	ko04922	Glucagon signaling pathway	0.2253255	0.6980736	8	97
RNA degradation	7	0.6980736	1.365	0.084	Genetic Information Processing	ko03018	RNA degradation	0.2290554	0.6980736	7	83
Colorectal cancer	7	0.6980736	1.365	0.084	Human Diseases	ko05210	Colorectal cancer	0.2290554	0.6980736	7	83
Phagosome	13	0.70058385	2.534	0.076	Cellular Processes	ko04145	Phagosome	0.2320684	0.70058385	13	172
Melanogenesis	8	0.72156889	1.559	0.081	Organismal Systems	ko04916	Melanogenesis	0.2419249	0.72156889	8	99
RNA transport	14	0.72156889	2.729	0.074	Genetic Information Processing	ko03013	RNA transport	0.2435295	0.72156889	14	189
PI3K-Akt signaling pathway	26	0.7456787	5.068	0.069	Environmental Information Processing	ko04151	PI3K-Akt signaling pathway	0.2550149	0.7456787	26	377
Ribosome biogenesis in eukaryotes	7	0.7456787	1.365	0.081	Genetic Information Processing	ko03008	Ribosome biogenesis in eukaryotes	0.2564682	0.7456787	7	86
Ubiquitin mediated proteolysis	12	0.7456787	2.339	0.075	Genetic Information Processing	ko04120	Ubiquitin mediated proteolysis	0.2586573	0.7456787	12	161
Valine, leucine and isoleucine biosynthesis	1	0.75426804	0.195	0.2	Metabolism	ko00290	Valine, leucine and isoleucine biosynthesis	0.2660412	0.75426804	1	5
Thermogenesis	19	0.75426804	3.704	0.07	Organismal Systems	ko04714	Thermogenesis	0.2663509	0.75426804	19	270
Insulin secretion	7	0.77263944	1.365	0.08	Organismal Systems	ko04911	Insulin secretion	0.2752528	0.77263944	7	88
Th17 cell differentiation	12	0.77640807	2.339	0.073	Organismal Systems	ko04659	Th17 cell differentiation	0.2791821	0.77640807	12	164
Mucin type O-glycan biosynthesis	3	0.77640807	0.585	0.097	Metabolism	ko00512	Mucin type O-glycan biosynthesis	0.2838742	0.77640807	3	31
SNARE interactions in vesicular transport	3	0.77640807	0.585	0.097	Genetic Information Processing	ko04130	SNARE interactions in vesicular transport	0.2838742	0.77640807	3	31
HTLV-I infection	20	0.78488705	3.899	0.069	Human Diseases	ko05166	HTLV-I infection	0.2894271	0.78488705	20	290
Platelet activation	8	0.83851307	1.559	0.075	Organismal Systems	ko04611	Platelet activation	0.3118299	0.83851307	8	107
Tight junction	12	0.83851307	2.339	0.071	Cellular Processes	ko04530	Tight junction	0.3144424	0.83851307	12	169
Folate biosynthesis	3	0.83927458	0.585	0.091	Metabolism	ko00790	Folate biosynthesis	0.3173507	0.83927458	3	33
MicroRNAs in cancer	11	0.84567961	2.144	0.071	Human Diseases	ko05206	MicroRNAs in cancer	0.3259696	0.84567961	11	155
GnRH secretion	5	0.84567961	0.975	0.079	Organismal Systems	ko04929	GnRH secretion	0.3263012	0.84567961	5	63
Influenza A	12	0.84567961	2.339	0.07	Human Diseases	ko05164	Influenza A	0.3288513	0.84567961	12	171
Arginine biosynthesis	2	0.84567961	0.39	0.1	Metabolism	ko00220	Arginine biosynthesis	0.3393963	0.84567961	2	20
Selenocompound metabolism	2	0.84567961	0.39	0.1	Metabolism	ko00450	Selenocompound metabolism	0.3393963	0.84567961	2	20
Retrograde endocannabinoid signaling	11	0.84567961	2.144	0.07	Organismal Systems	ko04723	Retrograde endocannabinoid signaling	0.341214	0.84567961	11	157
Relaxin signaling pathway	9	0.84567961	1.754	0.071	Organismal Systems	ko04926	Relaxin signaling pathway	0.3433011	0.84567961	9	126
Chronic myeloid leukemia	6	0.84567961	1.17	0.075	Human Diseases	ko05220	Chronic myeloid leukemia	0.3472099	0.84567961	6	80
Pathogenic Escherichia coli infection	15	0.84567961	2.924	0.068	Human Diseases	ko05130	Pathogenic Escherichia coli infection	0.3474032	0.84567961	15	221
Thyroid hormone signaling pathway	8	0.84567961	1.559	0.072	Organismal Systems	ko04919	Thyroid hormone signaling pathway	0.348263	0.84567961	8	111
Gastric cancer	12	0.84567961	2.339	0.069	Human Diseases	ko05226	Gastric cancer	0.350722	0.84567961	12	174
Apoptosis - fly	4	0.84567961	0.78	0.08	Cellular Processes	ko04214	Apoptosis - fly	0.3523303	0.84567961	4	50
Leukocyte transendothelial migration	10	0.84567961	1.949	0.07	Organismal Systems	ko04670	Leukocyte transendothelial migration	0.354583	0.84567961	10	143
Aldosterone-regulated sodium reabsorption	3	0.84567961	0.585	0.083	Organismal Systems	ko04960	Aldosterone-regulated sodium reabsorption	0.3675916	0.84567961	3	36
Circadian entrainment	7	0.84567961	1.365	0.071	Organismal Systems	ko04713	Circadian entrainment	0.3731422	0.84567961	7	98
Apoptosis	10	0.84567961	1.949	0.068	Cellular Processes	ko04210	Apoptosis	0.3790583	0.84567961	10	146
Necroptosis	11	0.84567961	2.144	0.068	Cellular Processes	ko04217	Necroptosis	0.3798268	0.84567961	11	162
Hedgehog signaling pathway	4	0.84567961	0.78	0.077	Environmental Information Processing	ko04340	Hedgehog signaling pathway	0.3801101	0.84567961	4	52
Oxidative phosphorylation	12	0.84567961	2.339	0.067	Metabolism	ko00190	Oxidative phosphorylation	0.3802455	0.84567961	12	178
Histidine metabolism	2	0.84567961	0.39	0.091	Metabolism	ko00340	Histidine metabolism	0.3835947	0.84567961	2	22
Mannose type O-glycan biosyntheis	2	0.84567961	0.39	0.091	Metabolism	ko00515	Mannose type O-glycan biosyntheis	0.3835947	0.84567961	2	22
Proximal tubule bicarbonate reclamation	2	0.84567961	0.39	0.091	Organismal Systems	ko04964	Proximal tubule bicarbonate reclamation	0.3835947	0.84567961	2	22
Alanine, aspartate and glutamate metabolism	3	0.84567961	0.585	0.081	Metabolism	ko00250	Alanine, aspartate and glutamate metabolism	0.3842238	0.84567961	3	37
Vitamin B6 metabolism	1	0.84567961	0.195	0.125	Metabolism	ko00750	Vitamin B6 metabolism	0.3904129	0.84567961	1	8
Circadian rhythm - fly	1	0.84567961	0.195	0.125	Organismal Systems	ko04711	Circadian rhythm - fly	0.3904129	0.84567961	1	8
Transcriptional misregulation in cancers	17	0.84567961	3.314	0.065	Human Diseases	ko05202	Transcriptional misregulation in cancers	0.3916566	0.84567961	17	260
Arginine and proline metabolism	4	0.84567961	0.78	0.075	Metabolism	ko00330	Arginine and proline metabolism	0.3939603	0.84567961	4	53
Toxoplasmosis	8	0.84567961	1.559	0.069	Human Diseases	ko05145	Toxoplasmosis	0.3944805	0.84567961	8	116
Glyoxylate and dicarboxylate metabolism	3	0.84567961	0.585	0.079	Metabolism	ko00630	Glyoxylate and dicarboxylate metabolism	0.4007535	0.84567961	3	38
Hepatocellular carcinoma	11	0.84567961	2.144	0.067	Human Diseases	ko05225	Hepatocellular carcinoma	0.40321	0.84567961	11	165
Glutathione metabolism	4	0.84567961	0.78	0.074	Metabolism	ko00480	Glutathione metabolism	0.4077625	0.84567961	4	54
Notch signaling pathway	4	0.84567961	0.78	0.074	Environmental Information Processing	ko04330	Notch signaling pathway	0.4077625	0.84567961	4	54
Various types of N-glycan biosynthesis	3	0.84567961	0.585	0.077	Metabolism	ko00513	Various types of N-glycan biosynthesis	0.4171566	0.84567961	3	39
Hedgehog signaling pathway - fly	3	0.84567961	0.585	0.077	Environmental Information Processing	ko04341	Hedgehog signaling pathway - fly	0.4171566	0.84567961	3	39
Nicotine addiction	3	0.84567961	0.585	0.077	Human Diseases	ko05033	Nicotine addiction	0.4171566	0.84567961	3	39
Endocrine resistance	6	0.84567961	1.17	0.069	Human Diseases	ko01522	Endocrine resistance	0.423439	0.84567961	6	87
Endometrial cancer	6	0.84567961	1.17	0.069	Human Diseases	ko05213	Endometrial cancer	0.423439	0.84567961	6	87
cGMP - PKG signaling pathway	11	0.84567961	2.144	0.065	Environmental Information Processing	ko04022	cGMP - PKG signaling pathway	0.4266506	0.84567961	11	168
Sulfur metabolism	1	0.84567961	0.195	0.111	Metabolism	ko00920	Sulfur metabolism	0.4270052	0.84567961	1	9
Apelin signaling pathway	9	0.84567961	1.754	0.066	Environmental Information Processing	ko04371	Apelin signaling pathway	0.4299916	0.84567961	9	136
Fluid shear stress and atherosclerosis	9	0.84567961	1.754	0.066	Human Diseases	ko05418	Fluid shear stress and atherosclerosis	0.4299916	0.84567961	9	136
Insulin resistance	7	0.84567961	1.365	0.067	Human Diseases	ko04931	Insulin resistance	0.4330386	0.84567961	7	104
Nucleotide excision repair	3	0.84567961	0.585	0.075	Genetic Information Processing	ko03420	Nucleotide excision repair	0.4334108	0.84567961	3	40
Thyroid hormone synthesis	5	0.85713878	0.975	0.068	Organismal Systems	ko04918	Thyroid hormone synthesis	0.447077	0.85713878	5	73
Bile secretion	5	0.85713878	0.975	0.068	Organismal Systems	ko04976	Bile secretion	0.447077	0.85713878	5	73
Protein export	2	0.85713878	0.39	0.08	Genetic Information Processing	ko03060	Protein export	0.4473193	0.85713878	2	25
Natural killer cell mediated cytotoxicity	8	0.85724381	1.559	0.066	Organismal Systems	ko04650	Natural killer cell mediated cytotoxicity	0.450053	0.85724381	8	122
Pancreatic cancer	5	0.86905202	0.975	0.068	Human Diseases	ko05212	Pancreatic cancer	0.4589681	0.86905202	5	74
Pyruvate metabolism	3	0.87529357	0.585	0.071	Metabolism	ko00620	Pyruvate metabolism	0.4653923	0.87529357	3	42
Hippo signaling pathway - multiple species	2	0.87529357	0.39	0.077	Environmental Information Processing	ko04392	Hippo signaling pathway - multiple species	0.467735	0.87529357	2	26
FoxO signaling pathway	8	0.8885066	1.559	0.064	Environmental Information Processing	ko04068	FoxO signaling pathway	0.4775723	0.8885066	8	125
Fatty acid metabolism	4	0.89707406	0.78	0.067	Metabolism	ko01212	Fatty acid metabolism	0.48877	0.89707406	4	60
Longevity regulating pathway - multiple species	4	0.89707406	0.78	0.067	Organismal Systems	ko04213	Longevity regulating pathway - multiple species	0.48877	0.89707406	4	60
TNF signaling pathway	7	0.89707406	1.365	0.064	Environmental Information Processing	ko04668	TNF signaling pathway	0.4921183	0.89707406	7	110
Ubiquinone and other terpenoid-quinone biosynthesis	1	0.89707406	0.195	0.091	Metabolism	ko00130	Ubiquinone and other terpenoid-quinone biosynthesis	0.4937434	0.89707406	1	11
Prostate cancer	6	0.89707406	1.17	0.064	Human Diseases	ko05215	Prostate cancer	0.4983535	0.89707406	6	94
mRNA surveillance pathway	7	0.89707406	1.365	0.063	Genetic Information Processing	ko03015	mRNA surveillance pathway	0.5018008	0.89707406	7	111
Arrhythmogenic right ventricular cardiomyopathy (ARVC)	7	0.89707406	1.365	0.063	Human Diseases	ko05412	Arrhythmogenic right ventricular cardiomyopathy (ARVC)	0.5018008	0.89707406	7	111
Synthesis and degradation of ketone bodies	1	0.9225245	0.195	0.083	Metabolism	ko00072	Synthesis and degradation of ketone bodies	0.5241437	0.9225245	1	12
Fatty acid degradation	3	0.9225245	0.585	0.065	Metabolism	ko00071	Fatty acid degradation	0.5267796	0.9225245	3	46
Metabolism of xenobiotics by cytochrome P450	3	0.9225245	0.585	0.065	Metabolism	ko00980	Metabolism of xenobiotics by cytochrome P450	0.5267796	0.9225245	3	46
Lysine degradation	4	0.9225245	0.78	0.063	Metabolism	ko00310	Lysine degradation	0.5275687	0.9225245	4	63
Adrenergic signaling in cardiomyocytes	9	0.94046852	1.754	0.06	Organismal Systems	ko04261	Adrenergic signaling in cardiomyocytes	0.5407694	0.94046852	9	149
Citrate cycle (TCA cycle)	2	0.9421357	0.39	0.067	Metabolism	ko00020	Citrate cycle (TCA cycle)	0.5446722	0.9421357	2	30
Vascular smooth muscle contraction	8	0.94394408	1.559	0.06	Organismal Systems	ko04270	Vascular smooth muscle contraction	0.5490021	0.94394408	8	133
Cortisol synthesis and secretion	4	0.94394408	0.78	0.062	Organismal Systems	ko04927	Cortisol synthesis and secretion	0.5526226	0.94394408	4	65
Galactose metabolism	2	0.94394408	0.39	0.065	Metabolism	ko00052	Galactose metabolism	0.5626583	0.94394408	2	31
Neurotrophin signaling pathway	7	0.94394408	1.365	0.059	Organismal Systems	ko04722	Neurotrophin signaling pathway	0.5676512	0.94394408	7	118
Steroid hormone biosynthesis	3	0.94394408	0.585	0.061	Metabolism	ko00140	Steroid hormone biosynthesis	0.5701613	0.94394408	3	49
Adipocytokine signaling pathway	4	0.94394408	0.78	0.06	Organismal Systems	ko04920	Adipocytokine signaling pathway	0.5769569	0.94394408	4	67
Autophagy - other eukaryotes	2	0.94394408	0.39	0.062	Cellular Processes	ko04136	Autophagy - other eukaryotes	0.5801296	0.94394408	2	32
Prion diseases	2	0.94394408	0.39	0.062	Human Diseases	ko05020	Prion diseases	0.5801296	0.94394408	2	32
Longevity regulating pathway - mammal	5	0.94394408	0.975	0.059	Organismal Systems	ko04211	Longevity regulating pathway - mammal	0.5832393	0.94394408	5	85
Gap junction	5	0.94394408	0.975	0.059	Cellular Processes	ko04540	Gap junction	0.5832393	0.94394408	5	85
B cell receptor signaling pathway	5	0.94394408	0.975	0.059	Organismal Systems	ko04662	B cell receptor signaling pathway	0.5832393	0.94394408	5	85
N-Glycan biosynthesis	3	0.94394408	0.585	0.06	Metabolism	ko00510	N-Glycan biosynthesis	0.5840654	0.94394408	3	50
Aminoacyl-tRNA biosynthesis	3	0.94394408	0.585	0.06	Genetic Information Processing	ko00970	Aminoacyl-tRNA biosynthesis	0.5840654	0.94394408	3	50
Melanoma	4	0.94412673	0.78	0.059	Human Diseases	ko05218	Melanoma	0.5888387	0.94412673	4	68
Hippo signaling pathway	11	0.94412673	2.144	0.058	Environmental Information Processing	ko04390	Hippo signaling pathway	0.5930296	0.94412673	11	190
Tuberculosis	11	0.94412673	2.144	0.058	Human Diseases	ko05152	Tuberculosis	0.5930296	0.94412673	11	190
Inositol phosphate metabolism	4	0.9513242	0.78	0.058	Metabolism	ko00562	Inositol phosphate metabolism	0.6005234	0.9513242	4	69
Protein digestion and absorption	6	0.97325525	1.17	0.057	Organismal Systems	ko04974	Protein digestion and absorption	0.6174088	0.97325525	6	106
Mitophagy - animal	4	0.97769992	0.78	0.056	Cellular Processes	ko04137	Mitophagy - animal	0.6232837	0.97769992	4	71
Thiamine metabolism	1	0.97776326	0.195	0.062	Metabolism	ko00730	Thiamine metabolism	0.6285812	0.97776326	1	16
Propanoate metabolism	2	0.97776326	0.39	0.057	Metabolism	ko00640	Propanoate metabolism	0.6294351	0.97776326	2	35
Fc epsilon RI signaling pathway	4	0.97891931	0.78	0.056	Organismal Systems	ko04664	Fc epsilon RI signaling pathway	0.6343521	0.97891931	4	72
Autophagy - animal	8	0.97891931	1.559	0.056	Cellular Processes	ko04140	Autophagy - animal	0.6399374	0.97891931	8	144
Alcoholism	11	0.97891931	2.144	0.056	Human Diseases	ko05034	Alcoholism	0.6413908	0.97891931	11	197
Rap1 signaling pathway	15	0.97891931	2.924	0.056	Environmental Information Processing	ko04015	Rap1 signaling pathway	0.6424158	0.97891931	15	267
mTOR signaling pathway	9	0.99581872	1.754	0.055	Environmental Information Processing	ko04150	mTOR signaling pathway	0.6570259	0.99581872	9	164
Nicotinate and nicotinamide metabolism	2	0.99581872	0.39	0.054	Metabolism	ko00760	Nicotinate and nicotinamide metabolism	0.6597299	0.99581872	2	37
Glycosaminoglycan biosynthesis - chondroitin sulfate / dermatan sulfate	1	1	0.195	0.056	Metabolism	ko00532	Glycosaminoglycan biosynthesis - chondroitin sulfate / dermatan sulfate	0.6718757	1	1	18
cAMP signaling pathway	12	1	2.339	0.055	Environmental Information Processing	ko04024	cAMP signaling pathway	0.6757241	1	12	220
C-type lectin receptor signaling pathway	5	1	0.975	0.052	Organismal Systems	ko04625	C-type lectin receptor signaling pathway	0.690437	1	5	96
Chemical carcinogenesis	3	1	0.585	0.051	Human Diseases	ko05204	Chemical carcinogenesis	0.6957849	1	3	59
NOD-like receptor signaling pathway	9	1	1.754	0.053	Organismal Systems	ko04621	NOD-like receptor signaling pathway	0.6984659	1	9	170
Toll-like receptor signaling pathway	5	1	0.975	0.052	Organismal Systems	ko04620	Toll-like receptor signaling pathway	0.6991855	1	5	97
Estrogen signaling pathway	7	1	1.365	0.052	Organismal Systems	ko04915	Estrogen signaling pathway	0.7006031	1	7	134
Apoptosis - multiple species	2	1	0.39	0.05	Cellular Processes	ko04215	Apoptosis - multiple species	0.7014071	1	2	40
Basal cell carcinoma	3	1	0.585	0.05	Human Diseases	ko05217	Basal cell carcinoma	0.7066804	1	3	60
Lysosome	7	1	1.365	0.052	Cellular Processes	ko04142	Lysosome	0.7079504	1	7	135
One carbon pool by folate	1	1	0.195	0.05	Metabolism	ko00670	One carbon pool by folate	0.7101322	1	1	20
p53 signaling pathway	4	1	0.78	0.05	Cellular Processes	ko04115	p53 signaling pathway	0.7151307	1	4	80
Legionellosis	3	1	0.585	0.049	Human Diseases	ko05134	Legionellosis	0.7172749	1	3	61
Carbohydrate digestion and absorption	2	1	0.39	0.048	Organismal Systems	ko04973	Carbohydrate digestion and absorption	0.7267723	1	2	42
Hippo signaling pathway -fly	3	1	0.585	0.048	Environmental Information Processing	ko04391	Hippo signaling pathway -fly	0.7275708	1	3	62
Central carbon metabolism in cancer	3	1	0.585	0.048	Human Diseases	ko05230	Central carbon metabolism in cancer	0.7275708	1	3	62
Pancreatic secretion	5	1	0.975	0.05	Organismal Systems	ko04972	Pancreatic secretion	0.7324586	1	5	101
Signaling pathways regulating pluripotency of stem cells	7	1	1.365	0.05	Cellular Processes	ko04550	Signaling pathways regulating pluripotency of stem cells	0.7361311	1	7	139
PD-L1 expression and PD-1 checkpoint pathway in cancer	7	1	1.365	0.05	Human Diseases	ko05235	PD-L1 expression and PD-1 checkpoint pathway in cancer	0.7361311	1	7	139
Basal transcription factors	2	1	0.39	0.047	Genetic Information Processing	ko03022	Basal transcription factors	0.7387571	1	2	43
Kaposi sarcoma-associated herpesvirus infection	9	1	1.754	0.05	Human Diseases	ko05167	Kaposi sarcoma-associated herpesvirus infection	0.7544273	1	9	179
Pentose and glucuronate interconversions	1	1	0.195	0.043	Metabolism	ko00040	Pentose and glucuronate interconversions	0.7593323	1	1	23
Measles	10	1	1.949	0.05	Human Diseases	ko05162	Measles	0.7683	1	10	200
Longevity regulating pathway - worm	4	1	0.78	0.046	Organismal Systems	ko04212	Longevity regulating pathway - worm	0.7743938	1	4	87
Spliceosome	8	1	1.559	0.048	Genetic Information Processing	ko03040	Spliceosome	0.7811085	1	8	165
Proteasome	2	1	0.39	0.043	Genetic Information Processing	ko03050	Proteasome	0.7822935	1	2	47
Cocaine addiction	2	1	0.39	0.043	Human Diseases	ko05030	Cocaine addiction	0.7822935	1	2	47
Renin-angiotensin system	1	1	0.195	0.04	Organismal Systems	ko04614	Renin-angiotensin system	0.7874081	1	1	25
Ovarian Steroidogenesis	2	1	0.39	0.042	Organismal Systems	ko04913	Ovarian Steroidogenesis	0.7921334	1	2	48
Fat digestion and absorption	2	1	0.39	0.042	Organismal Systems	ko04975	Fat digestion and absorption	0.7921334	1	2	48
African trypanosomiasis	2	1	0.39	0.042	Human Diseases	ko05143	African trypanosomiasis	0.7921334	1	2	48
Complement and coagulation cascades	4	1	0.78	0.044	Organismal Systems	ko04610	Complement and coagulation cascades	0.7966374	1	4	90
Calcium signaling pathway	13	1	2.534	0.049	Environmental Information Processing	ko04020	Calcium signaling pathway	0.8036408	1	13	263
Ether lipid metabolism	2	1	0.39	0.04	Metabolism	ko00565	Ether lipid metabolism	0.8106421	1	2	50
Fatty acid elongation	1	1	0.195	0.037	Metabolism	ko00062	Fatty acid elongation	0.8122142	1	1	27
Maturity onset diabetes of the young	1	1	0.195	0.037	Human Diseases	ko04950	Maturity onset diabetes of the young	0.8122142	1	1	27
Vitamin digestion and absorption	1	1	0.195	0.037	Organismal Systems	ko04977	Vitamin digestion and absorption	0.8122142	1	1	27
Glycine, serine and threonine metabolism	2	1	0.39	0.039	Metabolism	ko00260	Glycine, serine and threonine metabolism	0.8193344	1	2	51
Fanconi anemia pathway	2	1	0.39	0.039	Genetic Information Processing	ko03460	Fanconi anemia pathway	0.8193344	1	2	51
Pertussis	3	1	0.585	0.041	Human Diseases	ko05133	Pertussis	0.8221841	1	3	73
Glycosphingolipid biosynthesis - lacto and neolacto series	1	1	0.195	0.036	Metabolism	ko00601	Glycosphingolipid biosynthesis - lacto and neolacto series	0.8235118	1	1	28
ABC transporters	2	1	0.39	0.038	Environmental Information Processing	ko02010	ABC transporters	0.8276678	1	2	52
Growth hormone synthesis, secretion and action	5	1	0.975	0.043	Organismal Systems	ko04935	Growth hormone synthesis, secretion and action	0.8276895	1	5	115
Platinum drug resistance	3	1	0.585	0.041	Human Diseases	ko01524	Platinum drug resistance	0.8292123	1	3	74
Butanoate metabolism	1	1	0.195	0.034	Metabolism	ko00650	Butanoate metabolism	0.8341309	1	1	29
Tryptophan metabolism	2	1	0.39	0.038	Metabolism	ko00380	Tryptophan metabolism	0.8356538	1	2	53
Cell adhesion molecules (CAMs)	10	1	1.949	0.047	Environmental Information Processing	ko04514	Cell adhesion molecules (CAMs)	0.8385628	1	10	215
Phospholipase D signaling pathway	7	1	1.365	0.045	Environmental Information Processing	ko04072	Phospholipase D signaling pathway	0.8392113	1	7	157
Starch and sucrose metabolism	1	1	0.195	0.033	Metabolism	ko00500	Starch and sucrose metabolism	0.8441122	1	1	30
Porphyrin and chlorophyll metabolism	1	1	0.195	0.033	Metabolism	ko00860	Porphyrin and chlorophyll metabolism	0.8441122	1	1	30
Hypertrophic cardiomyopathy (HCM)	4	1	0.78	0.041	Human Diseases	ko05410	Hypertrophic cardiomyopathy (HCM)	0.8473854	1	4	98
Ferroptosis	2	1	0.39	0.036	Cellular Processes	ko04216	Ferroptosis	0.8506303	1	2	55
Breast cancer	6	1	1.17	0.043	Human Diseases	ko05224	Breast cancer	0.8573201	1	6	141
Retinol metabolism	2	1	0.39	0.035	Metabolism	ko00830	Retinol metabolism	0.8643547	1	2	57
beta-Alanine metabolism	1	1	0.195	0.03	Metabolism	ko00410	beta-Alanine metabolism	0.8706006	1	1	33
Vibrio cholerae infection	2	1	0.39	0.034	Human Diseases	ko05110	Vibrio cholerae infection	0.870775	1	2	58
Synaptic vesicle cycle	3	1	0.585	0.037	Organismal Systems	ko04721	Synaptic vesicle cycle	0.872031	1	3	81
DNA replication	1	1	0.195	0.029	Genetic Information Processing	ko03030	DNA replication	0.878391	1	1	34
Human immunodeficiency virus 1 infection	13	1	2.534	0.046	Human Diseases	ko05170	Human immunodeficiency virus 1 infection	0.8812938	1	13	285
Mineral absorption	2	1	0.39	0.033	Organismal Systems	ko04978	Mineral absorption	0.8827851	1	2	60
Linoleic acid metabolism	1	1	0.195	0.029	Metabolism	ko00591	Linoleic acid metabolism	0.8857132	1	1	35
Antifolate resistance	1	1	0.195	0.029	Human Diseases	ko01523	Antifolate resistance	0.8857132	1	1	35
Drug metabolism - other enzymes	2	1	0.39	0.033	Metabolism	ko00983	Drug metabolism - other enzymes	0.8883957	1	2	61
Salivary secretion	3	1	0.585	0.035	Organismal Systems	ko04970	Salivary secretion	0.8919892	1	3	85
Viral carcinogenesis	9	1	1.754	0.042	Human Diseases	ko05203	Viral carcinogenesis	0.9052421	1	9	215
T cell receptor signaling pathway	6	1	1.17	0.039	Organismal Systems	ko04660	T cell receptor signaling pathway	0.9069353	1	6	154
Glycolysis / Gluconeogenesis	2	1	0.39	0.031	Metabolism	ko00010	Glycolysis / Gluconeogenesis	0.9084365	1	2	65
Epstein-Barr virus infection	12	1	2.339	0.043	Human Diseases	ko05169	Epstein-Barr virus infection	0.911118	1	12	277
Hematopoietic cell lineage	4	1	0.78	0.035	Organismal Systems	ko04640	Hematopoietic cell lineage	0.91402	1	4	113
Base excision repair	1	1	0.195	0.024	Genetic Information Processing	ko03410	Base excision repair	0.9260197	1	1	42
Leishmaniasis	3	1	0.585	0.032	Human Diseases	ko05140	Leishmaniasis	0.927047	1	3	94
Human cytomegalovirus infection	9	1	1.754	0.04	Human Diseases	ko05163	Human cytomegalovirus infection	0.9274681	1	9	224
Taste transduction	2	1	0.39	0.028	Organismal Systems	ko04742	Taste transduction	0.9322804	1	2	71
Drug metabolism - cytochrome P450	1	1	0.195	0.022	Metabolism	ko00982	Drug metabolism - cytochrome P450	0.9423084	1	1	46
Type II diabetes mellitus	1	1	0.195	0.022	Human Diseases	ko04930	Type II diabetes mellitus	0.9423084	1	1	46
Th1 and Th2 cell differentiation	5	1	0.975	0.034	Organismal Systems	ko04658	Th1 and Th2 cell differentiation	0.9453707	1	5	147
Ribosome	11	1	2.144	0.04	Genetic Information Processing	ko03010	Ribosome	0.9462332	1	11	275
Neuroactive ligand-receptor interaction	14	1	2.729	0.04	Environmental Information Processing	ko04080	Neuroactive ligand-receptor interaction	0.9606758	1	14	347
Systemic lupus erythematosus	8	1	1.559	0.036	Human Diseases	ko05322	Systemic lupus erythematosus	0.963238	1	8	224
Ras signaling pathway	11	1	2.144	0.038	Environmental Information Processing	ko04014	Ras signaling pathway	0.9678385	1	11	292
IL-17 signaling pathway	2	1	0.39	0.023	Organismal Systems	ko04657	IL-17 signaling pathway	0.9688028	1	2	86
Axon regeneration	2	1	0.39	0.022	Organismal Systems	ko04361	Axon regeneration	0.9733638	1	2	89
Inflammatiory bowel disease (IBD)	3	1	0.585	0.024	Human Diseases	ko05321	Inflammatiory bowel disease (IBD)	0.9819254	1	3	124
Renin secretion	1	1	0.195	0.015	Organismal Systems	ko04924	Renin secretion	0.9843961	1	1	67
Jak-STAT signaling pathway	5	1	0.975	0.028	Environmental Information Processing	ko04630	Jak-STAT signaling pathway	0.9851002	1	5	179
Epithelial cell signaling in Helicobacter pylori infection	1	1	0.195	0.014	Human Diseases	ko05120	Epithelial cell signaling in Helicobacter pylori infection	0.9878409	1	1	71
Arachidonic acid metabolism	1	1	0.195	0.014	Metabolism	ko00590	Arachidonic acid metabolism	0.9899163	1	1	74
Prolactin signaling pathway	1	1	0.195	0.013	Organismal Systems	ko04917	Prolactin signaling pathway	0.9905263	1	1	75
Type I diabetes mellitus	2	1	0.39	0.018	Human Diseases	ko04940	Type I diabetes mellitus	0.9909042	1	2	109
RIG-I-like receptor signaling pathway	1	1	0.195	0.013	Organismal Systems	ko04622	RIG-I-like receptor signaling pathway	0.9921441	1	1	78
Dilated cardiomyopathy (DCM)	2	1	0.39	0.017	Human Diseases	ko05414	Dilated cardiomyopathy (DCM)	0.9944471	1	2	118
NF-kappa B signaling pathway	4	1	0.78	0.023	Environmental Information Processing	ko04064	NF-kappa B signaling pathway	0.9945947	1	4	176
Chemokine signaling pathway	4	1	0.78	0.022	Organismal Systems	ko04062	Chemokine signaling pathway	0.9953117	1	4	179
Viral protein interaction with cytokine and cytokine receptor	1	1	0.195	0.011	Environmental Information Processing	ko04061	Viral protein interaction with cytokine and cytokine receptor	0.9955224	1	1	87
Intestinal immune network for IgA production	2	1	0.39	0.016	Organismal Systems	ko04672	Intestinal immune network for IgA production	0.9955482	1	2	122
Antigen processing and presentation	2	1	0.39	0.015	Organismal Systems	ko04612	Antigen processing and presentation	0.9975875	1	2	133
Graft-versus-host disease	1	1	0.195	0.01	Human Diseases	ko05332	Graft-versus-host disease	0.9977495	1	1	98
Chagas disease (American trypanosomiasis)	3	1	0.585	0.018	Human Diseases	ko05142	Chagas disease (American trypanosomiasis)	0.9980272	1	3	168
Asthma	1	1	0.195	0.01	Human Diseases	ko05310	Asthma	0.9981348	1	1	101
Malaria	1	1	0.195	0.01	Human Diseases	ko05144	Malaria	0.9984542	1	1	104
Viral myocarditis	2	1	0.39	0.014	Human Diseases	ko05416	Viral myocarditis	0.9984612	1	2	141
Rheumatoid arthritis	3	1	0.585	0.017	Human Diseases	ko05323	Rheumatoid arthritis	0.9987016	1	3	176
Allograft rejection	1	1	0.195	0.008	Human Diseases	ko05330	Allograft rejection	0.9993572	1	1	118
Staphylococcus aureus infection	2	1	0.39	0.012	Human Diseases	ko05150	Staphylococcus aureus infection	0.9995844	1	2	164
Autoimmune thyroid disease	1	1	0.195	0.008	Human Diseases	ko05320	Autoimmune thyroid disease	0.9996347	1	1	127
Herpes simplex infection	15	1	2.924	0.026	Human Diseases	ko05168	Herpes simplex infection	0.999979	1	15	582
Cytokine-cytokine receptor interaction	4	1	0.78	0.014	Environmental Information Processing	ko04060	Cytokine-cytokine receptor interaction	0.9999884	1	4	296
Olfactory transduction	6	1	1.17	0.009	Organismal Systems	ko04740	Olfactory transduction	1	1	6	654
