# Supplementary material for: The Landscape of Accessible Chromatin during Yak Adipocyte Differentiation
Source: Int J Mol Sci. 2022 Sep 1;23(17):9960. doi: 10.3390/ijms23179960 (PMC9456067; doi:10.3390/ijms23179960)
Supplement: Supplementary file 1 [file ijms-23-09960-s001.zip › Supplementary Table S6.xlsx]

## Sheet: Sheet1
peak_name	Chr	Start	End	p-value	FDR	Pread-1_reads	Pread-2_reads	Pread-3_reads	Ad-1_reads	Ad-2_reads	Ad-3_reads	Pread-1_rpkm	Pread-2_rpkm	Pread-3_rpkm	Ad-1_rpkm	Ad-2_rpkm	Ad-3_rpkm	Pread_mean	Ad_mean	rpkm_log2fc	annotation	anno_geneStart	anno_geneEnd	anno_geneLength	anno_geneStrand	anno_GeneId	anno_TranscriptId	dist_geneStart	dist_geneEnd	dist_geneLength	dist_geneStrand	dist_geneId	dist_transcriptId	distToTSS	Symbol	Description	KEGG_A_class	KEGG_B_class	Pathway	K_ID	GO_Component	GO_Function	GO_Process
MergePeak_2024	11	70668317	70668908	0.000117	0.0625	83	63	64	26	32	32	2.56	3.34	5.42	1.04	1.1	1.62	3.77	1.25	-1.59264	Intron (ENSBGRT00000012699/ENSBGRG00000006595, intron 1 of 19)	70598259	70715092	116834	-	ENSBGRG00000006595	ENSBGRT00000012699	70598259	70715092	116834	-	ENSBGRG00000006595	ENSBGRT00000012699	46480	ACTN1	actinin alpha 1 [Source:HGNC Symbol;Acc:HGNC:163]	Human Diseases;Human Diseases;Human Diseases;Cellular Processes;Cellular Processes;Cellular Processes;Organismal Systems;Human Diseases;Cellular Processes	Infectious diseases;Immune diseases;Cancers;Cell motility;Cellular community - eukaryotes;Cellular community - eukaryotes;Immune system;Infectious diseases;Cellular community - eukaryotes	ko05131//Shigellosis;ko05322//Systemic lupus erythematosus;ko05203//Viral carcinogenesis;ko04810//Regulation of actin cytoskeleton;ko04510//Focal adhesion;ko04530//Tight junction;ko04670//Leukocyte transendothelial migration;ko05146//Amoebiasis;ko04520//Adherens junction	K05699;K05699;K05699;K05699;K05699;K05699;K05699;K05699;K05699	GO:0001725//stress fiber;GO:0001726//ruffle;GO:0005737//cytoplasm;GO:0005884//actin filament;GO:0005903//brush border;GO:0005911//cell-cell junction;GO:0005916//fascia adherens;GO:0005925//focal adhesion;GO:0030017//sarcomere;GO:0030018//Z disc;GO:0042995//cell projection;GO:0098978//glutamatergic synapse	GO:0003725//double-stranded RNA binding;GO:0005178//integrin binding;GO:0005509//calcium ion binding;GO:0005515//protein binding;GO:0017166//vinculin binding;GO:0030374//nuclear receptor transcription coactivator activity;GO:0042803//protein homodimerization activity;GO:0044325//ion channel binding;GO:0051015//actin filament binding;GO:0099186//structural constituent of postsynapse	GO:0007015//actin filament organization;GO:0030220//platelet formation;GO:0036344//platelet morphogenesis;GO:0048041//focal adhesion assembly;GO:0051017//actin filament bundle assembly;GO:0051271//negative regulation of cellular component movement;GO:0051639//actin filament network formation;GO:0051764//actin crosslink formation
MergePeak_11986	3	101644881	101645721	0.00272	0.101	82	62	61	46	28	36	1.78	2.31	3.63	1.29	0.68	1.28	2.57	1.08	-1.25074	Promoter (<=1kb)	101423406	101645154	221749	-	ENSBGRG00000003114	ENSBGRT00000005798	101511046	101645154	134109	-	ENSBGRG00000003114	ENSBGRT00000005908	-147	SCP2	sterol carrier protein 2 [Source:HGNC Symbol;Acc:HGNC:10606]	Metabolism;Cellular Processes;Organismal Systems;Metabolism;Metabolism;Metabolism	Global and overview maps;Transport and catabolism;Endocrine system;Global and overview maps;Lipid metabolism;Lipid metabolism	ko01100//Metabolic pathways;ko04146//Peroxisome;ko03320//PPAR signaling pathway;ko01212//Fatty acid metabolism;ko01040//Biosynthesis of unsaturated fatty acids;ko00120//Primary bile acid biosynthesis	K08764;K08764;K08764;K08764;K08764;K08764	GO:0005654//nucleoplasm;GO:0005777//peroxisome;GO:0032991//protein-containing complex;GO:0043231//intracellular membrane-bounded organelle	GO:0000062//fatty-acyl-CoA binding;GO:0003824//catalytic activity;GO:0005102//signaling receptor binding;GO:0015485//cholesterol binding;GO:0016747//transferase activity, transferring acyl groups other than amino-acyl groups;GO:0036042//long-chain fatty acyl-CoA binding;GO:0070538//oleic acid binding	GO:0007031//peroxisome organization;GO:0032385//positive regulation of intracellular cholesterol transport;GO:1901373//lipid hydroperoxide transport
MergePeak_1181	10	51286599	51287005	0.0028	0.101	86	57	41	21	32	39	3.86	4.39	5.05	1.22	1.6	2.88	4.43	1.9	-1.22131	5' UTR	51211292	51287014	75723	-	ENSBGRG00000009881	ENSBGRT00000018234	51211292	51287014	75723	-	ENSBGRG00000009881	ENSBGRT00000018234	212	WASF1	WASP family member 1 [Source:HGNC Symbol;Acc:HGNC:12732]	Human Diseases;Human Diseases;Cellular Processes;Human Diseases;Organismal Systems;Cellular Processes;Human Diseases	Infectious diseases;Infectious diseases;Cell motility;Infectious diseases;Immune system;Cellular community - eukaryotes;Cancers	ko05131//Shigellosis;ko05130//Pathogenic Escherichia coli infection;ko04810//Regulation of actin cytoskeleton;ko05100//Bacterial invasion of epithelial cells;ko04666//Fc gamma R-mediated phagocytosis;ko04520//Adherens junction;ko05231//Choline metabolism in cancer	K05753;K05753;K05753;K05753;K05753;K05753;K05753	GO:0005737//cytoplasm;GO:0005739//mitochondrion;GO:0005741//mitochondrial outer membrane;GO:0005856//cytoskeleton;GO:0030027//lamellipodium;GO:0031209//SCAR complex;GO:0032991//protein-containing complex;GO:0098794//postsynapse	GO:0003779//actin binding;GO:0048365//Rac GTPase binding;GO:0051018//protein kinase A binding	GO:0006898//receptor-mediated endocytosis;GO:0016601//Rac protein signal transduction;GO:0030036//actin cytoskeleton organization;GO:0031175//neuron projection development;GO:0051388//positive regulation of neurotrophin TRK receptor signaling pathway;GO:0072673//lamellipodium morphogenesis;GO:0097484//dendrite extension;GO:0098885//modification of postsynaptic actin cytoskeleton;GO:1990416//cellu…
MergePeak_13790	6	1861324	1861991	0.00292	0.101	142	34	82	35	36	48	3.88	1.6	6.15	1.24	1.1	2.16	3.88	1.5	-1.37109	Intron (ENSBGRT00000018230/ENSBGRG00000009913, intron 18 of 19)	1857727	1920022	62296	-	ENSBGRG00000009913	ENSBGRT00000018230	1857727	1920022	62296	-	ENSBGRG00000009913	ENSBGRT00000018230	58365	ACOX3	acyl-CoA oxidase 3, pristanoyl [Source:HGNC Symbol;Acc:HGNC:121]	Metabolism;Environmental Information Processing;Metabolism;Cellular Processes;Organismal Systems;Metabolism;Metabolism;Metabolism;Metabolism;Metabolism;Metabolism	Global and overview maps;Signal transduction;Global and overview maps;Transport and catabolism;Endocrine system;Global and overview maps;Lipid metabolism;Carbohydrate metabolism;Metabolism of other amino acids;Lipid metabolism;Lipid metabolism	ko01100//Metabolic pathways;ko04024//cAMP signaling pathway;ko01200//Carbon metabolism;ko04146//Peroxisome;ko03320//PPAR signaling pathway;ko01212//Fatty acid metabolism;ko00071//Fatty acid degradation;ko00640//Propanoate metabolism;ko00410//beta-Alanine metabolism;ko00592//alpha-Linolenic acid metabolism;ko01040//Biosynthesis of unsaturated fatty acids	K00232;K00232;K00232;K00232;K00232;K00232;K00232;K00232;K00232;K00232;K00232	GO:0005777//peroxisome	GO:0003997//acyl-CoA oxidase activity;GO:0016627//oxidoreductase activity, acting on the CH-CH group of donors;GO:0071949//FAD binding	GO:0006631//fatty acid metabolic process;GO:0006635//fatty acid beta-oxidation;GO:0055114//oxidation-reduction process
MergePeak_324	1	75045969	75046719	0.00408	0.107	95	62	56	32	53	40	2.31	2.59	3.74	1.01	1.44	1.6	2.88	1.35	-1.09311	Intron (ENSBGRT00000020371/ENSBGRG00000011141, intron 11 of 11)	75031197	75173032	141836	-	ENSBGRG00000011141	ENSBGRT00000020371	75031197	75173032	141836	-	ENSBGRG00000011141	ENSBGRT00000020371	126688	ITGB5	integrin subunit beta 5 [Source:HGNC Symbol;Acc:HGNC:6160]	Environmental Information Processing;Human Diseases;Cellular Processes;Human Diseases;Cellular Processes;Cellular Processes;Human Diseases;Human Diseases;Human Diseases;Environmental Information Processing	Signal transduction;Infectious diseases;Cell motility;Cancers;Cellular community - eukaryotes;Transport and catabolism;Cardiovascular diseases;Cardiovascular diseases;Cardiovascular diseases;Signaling molecules and interaction	ko04151//PI3K-Akt signaling pathway;ko05165//Human papillomavirus infection;ko04810//Regulation of actin cytoskeleton;ko05205//Proteoglycans in cancer;ko04510//Focal adhesion;ko04145//Phagosome;ko05414//Dilated cardiomyopathy (DCM);ko05412//Arrhythmogenic right ventricular cardiomyopathy (ARVC);ko05410//Hypertrophic cardiomyopathy (HCM);ko04512//ECM-receptor interaction	K06588;K06588;K06588;K06588;K06588;K06588;K06588;K06588;K06588;K06588	GO:0008305//integrin complex;GO:0009986//cell surface;GO:0034684//integrin alphav-beta5 complex;GO:0043235//receptor complex	GO:0038023//signaling receptor activity	GO:0007160//cell-matrix adhesion;GO:0007179//transforming growth factor beta receptor signaling pathway;GO:0007229//integrin-mediated signaling pathway;GO:0035987//endodermal cell differentiation;GO:0043149//stress fiber assembly;GO:0090136//epithelial cell-cell adhesion
MergePeak_14144	6	88859967	88860411	0.00583	0.116	71	38	40	27	24	29	2.92	2.68	4.51	1.43	1.1	1.96	3.37	1.5	-1.16779	Intron (ENSBGRT00000037551/ENSBGRG00000020407, intron 6 of 6)	88852235	88860770	8536	+	ENSBGRG00000020407	ENSBGRT00000037551	88852235	88860770	8536	+	ENSBGRG00000020407	ENSBGRT00000037551	7954	SPP1	secreted phosphoprotein 1 [Source:HGNC Symbol;Acc:HGNC:11255]	Environmental Information Processing;Human Diseases;Cellular Processes;Environmental Information Processing;Organismal Systems;Environmental Information Processing;Organismal Systems	Signal transduction;Infectious diseases;Cellular community - eukaryotes;Signal transduction;Immune system;Signaling molecules and interaction;Endocrine system	ko04151//PI3K-Akt signaling pathway;ko05165//Human papillomavirus infection;ko04510//Focal adhesion;ko04371//Apelin signaling pathway;ko04620//Toll-like receptor signaling pathway;ko04512//ECM-receptor interaction;ko04929//GnRH secretion	K06250;K06250;K06250;K06250;K06250;K06250;K06250	GO:0005615//extracellular space;GO:0005794//Golgi apparatus	GO:0005178//integrin binding	GO:0001503//ossification;GO:0006710//androgen catabolic process;GO:0007155//cell adhesion;GO:0033280//response to vitamin D;GO:0045893//positive regulation of transcription, DNA-templated;GO:0071394//cellular response to testosterone stimulus;GO:2000866//positive regulation of estradiol secretion
MergePeak_9449	24	29391528	29391927	0.00689	0.122	94	53	29	34	30	32	4.3	4.16	3.64	2.01	1.53	2.4	4.03	1.98	-1.02528	Promoter (<=1kb)	29392073	29398583	6511	+	ENSBGRG00000019018	ENSBGRT00000034858	29392073	29398583	6511	+	ENSBGRG00000019018	ENSBGRT00000034858	-346	RXRB	retinoid X receptor beta [Source:HGNC Symbol;Acc:HGNC:10478]	Human Diseases;Human Diseases;Human Diseases;Organismal Systems;Organismal Systems;Organismal Systems;Human Diseases;Organismal Systems;Organismal Systems;Human Diseases;Human Diseases	Cancers;Cancers;Cancers;Immune system;Endocrine system;Endocrine system;Cancers;Endocrine system;Endocrine system;Cancers;Cancers	ko05200//Pathways in cancer;ko05202//Transcriptional misregulation in cancers;ko05226//Gastric cancer;ko04659//Th17 cell differentiation;ko04919//Thyroid hormone signaling pathway;ko04928//Parathyroid hormone synthesis, secretion and action;ko05222//Small cell lung cancer;ko03320//PPAR signaling pathway;ko04920//Adipocytokine signaling pathway;ko05223//Non-small cell lung cancer;ko05216//Thyroid …	K08525;K08525;K08525;K08525;K08525;K08525;K08525;K08525;K08525;K08525;K08525	GO:0005634//nucleus;GO:0005654//nucleoplasm	GO:0000977//RNA polymerase II regulatory region sequence-specific DNA binding;GO:0001228//DNA-binding transcription activator activity, RNA polymerase II-specific;GO:0003677//DNA binding;GO:0003700//DNA-binding transcription factor activity;GO:0003707//steroid hormone receptor activity;GO:0004879//nuclear receptor activity;GO:0008270//zinc ion binding;GO:0043565//sequence-specific DNA binding	GO:0006355//regulation of transcription, DNA-templated;GO:0045944//positive regulation of transcription by RNA polymerase II
MergePeak_1962	11	60636468	60637235	0.00735	0.124	112	66	67	31	51	59	2.66	2.69	4.37	0.95	1.35	2.31	3.24	1.54	-1.07306	Intron (ENSBGRT00000012477/ENSBGRG00000006735, intron 15 of 25)	60502165	60673860	171696	+	ENSBGRG00000006735	ENSBGRT00000012477	60502165	60673860	171696	+	ENSBGRG00000006735	ENSBGRT00000012477	134686	DAAM1	dishevelled associated activator of morphogenesis 1 [Source:HGNC Symbol;Acc:HGNC:18142]	Environmental Information Processing	Signal transduction	ko04310//Wnt signaling pathway	K04512	GO:0001725//stress fiber;GO:0005829//cytosol;GO:0005886//plasma membrane;GO:0031514//motile cilium;GO:0036064//ciliary basal body	GO:0003779//actin binding;GO:0017048//Rho GTPase binding;GO:0042802//identical protein binding	GO:0016043//cellular component organization;GO:0030036//actin cytoskeleton organization
MergePeak_8828	22	55042777	55043180	0.0076	0.124	68	32	46	17	37	26	3.08	2.49	5.71	0.99	1.87	1.93	3.76	1.6	-1.23266	Promoter (<=1kb)	55043155	55120360	77206	+	ENSBGRG00000012620	ENSBGRT00000023080	55043155	55061414	18260	+	ENSBGRG00000012620	ENSBGRT00000023698	-177	ACAA1	acetyl-CoA acyltransferase 1 [Source:HGNC Symbol;Acc:HGNC:82]	Metabolism;Cellular Processes;Organismal Systems;Metabolism;Metabolism;Metabolism;Metabolism;Metabolism	Global and overview maps;Transport and catabolism;Endocrine system;Global and overview maps;Amino acid metabolism;Lipid metabolism;Lipid metabolism;Lipid metabolism	ko01100//Metabolic pathways;ko04146//Peroxisome;ko03320//PPAR signaling pathway;ko01212//Fatty acid metabolism;ko00280//Valine, leucine and isoleucine degradation;ko00071//Fatty acid degradation;ko00592//alpha-Linolenic acid metabolism;ko01040//Biosynthesis of unsaturated fatty acids	K07513;K07513;K07513;K07513;K07513;K07513;K07513;K07513	GO:0005777//peroxisome;GO:0043231//intracellular membrane-bounded organelle	GO:0003824//catalytic activity;GO:0016401//palmitoyl-CoA oxidase activity;GO:0016747//transferase activity, transferring acyl groups other than amino-acyl groups	GO:0000038//very long-chain fatty acid metabolic process;GO:0006635//fatty acid beta-oxidation;GO:0008206//bile acid metabolic process
MergePeak_8659	22	26586268	26586748	0.00809	0.124	61	50	42	35	20	30	2.32	3.26	4.38	1.72	0.85	1.87	3.32	1.48	-1.16559	Intron (ENSBGRT00000049371/ENSBGRG00000026631, intron 1 of 7)	26436506	26713999	277494	-	ENSBGRG00000026631	ENSBGRT00000049371	26436506	26713999	277494	-	ENSBGRG00000026631	ENSBGRT00000049371	127491	PRICKLE2	prickle planar cell polarity protein 2 [Source:HGNC Symbol;Acc:HGNC:20340]	Environmental Information Processing	Signal transduction	ko04310//Wnt signaling pathway	K04511	GO:0005737//cytoplasm	GO:0005515//protein binding;GO:0008270//zinc ion binding;GO:0030234//enzyme regulator activity	-
MergePeak_7785	20	50942887	50943404	0.00852	0.124	71	54	56	18	51	36	2.5	3.27	5.42	0.82	2.01	2.09	3.73	1.64	-1.18548	5' UTR	50943093	50967437	24345	+	ENSBGRG00000021653	ENSBGRT00000040005	50943093	50967437	24345	+	ENSBGRG00000021653	ENSBGRT00000040005	52	PRKCG	protein kinase C gamma [Source:HGNC Symbol;Acc:HGNC:9402]	Human Diseases;Environmental Information Processing;Environmental Information Processing;Human Diseases;Environmental Information Processing;Environmental Information Processing;Human Diseases;Human Diseases;Cellular Processes;Human Diseases;Environmental Information Processing;Human Diseases;Environmental Information Processing;Organismal Systems;Human Diseases;Organismal Systems;Organismal Syst…	Cancers;Signal transduction;Signal transduction;Infectious disease: viral;Signal transduction;Signal transduction;Infectious diseases;Cancers;Cellular community - eukaryotes;Cancers;Signal transduction;Infectious diseases;Signal transduction;Nervous system;Cancers;Endocrine system;Immune system;Circulatory system;Nervous system;Immune system;Infectious diseases;Signal transduction;Endocrine syste…	ko05200//Pathways in cancer;ko04014//Ras signaling pathway;ko04010//MAPK signaling pathway;ko05170//Human immunodeficiency virus 1 infection;ko04015//Rap1 signaling pathway;ko04020//Calcium signaling pathway;ko05163//Human cytomegalovirus infection;ko05205//Proteoglycans in cancer;ko04510//Focal adhesion;ko05225//Hepatocellular carcinoma;ko04150//mTOR signaling pathway;ko05161//Hepatitis B;ko0431…	K19663;K19663;K19663;K19663;K19663;K19663;K19663;K19663;K19663;K19663;K19663;K19663;K19663;K19663;K19663;K19663;K19663;K19663;K19663;K19663;K19663;K19663;K19663;K19663;K19663;K19663;K19663;K19663;K19663;K19663;K19663;K19663;K19663;K19663;K19663;K19663;K19663;K19663;K19663;K19663;K19663;K19663;K19663;K19663;K19663;K19663;K19663;K19663;K19663;K19663;K19663;K19663;K19663;K19663;K19663;K19663;K19663	-	GO:0004672//protein kinase activity;GO:0004674//protein serine/threonine kinase activity;GO:0004697//protein kinase C activity;GO:0004712//protein serine/threonine/tyrosine kinase activity;GO:0005524//ATP binding;GO:0008270//zinc ion binding	GO:0006468//protein phosphorylation;GO:0016310//phosphorylation;GO:0031397//negative regulation of protein ubiquitination;GO:0032425//positive regulation of mismatch repair;GO:0035556//intracellular signal transduction;GO:0042177//negative regulation of protein catabolic process
MergePeak_7967	20	61468053	61468692	0.00876	0.124	79	52	37	38	40	25	2.25	2.55	2.9	1.4	1.27	1.17	2.57	1.28	-1.00562	Intron (ENSBGRT00000030164/ENSBGRG00000016330, intron 2 of 5)	61446195	61523299	77105	-	ENSBGRG00000016330	ENSBGRT00000030164	61446195	61523299	77105	-	ENSBGRG00000016330	ENSBGRT00000030164	54927	ARHGAP35	Rho GTPase activating protein 35 [Source:HGNC Symbol;Acc:HGNC:4591]	Cellular Processes;Cellular Processes;Organismal Systems;Organismal Systems	Cell motility;Cellular community - eukaryotes;Immune system;Immune system	ko04810//Regulation of actin cytoskeleton;ko04510//Focal adhesion;ko04670//Leukocyte transendothelial migration;ko04611//Platelet activation	K05732;K05732;K05732;K05732	GO:0005737//cytoplasm;GO:0015629//actin cytoskeleton;GO:0036064//ciliary basal body	GO:0003924//GTPase activity;GO:0005096//GTPase activator activity;GO:0005525//GTP binding;GO:0005543//phospholipid binding	GO:0001843//neural tube closure;GO:0007165//signal transduction;GO:0007411//axon guidance;GO:0007413//axonal fasciculation;GO:0008064//regulation of actin polymerization or depolymerization;GO:0008360//regulation of cell shape;GO:0010976//positive regulation of neuron projection development;GO:0016477//cell migration;GO:0021955//central nervous system neuron axonogenesis;GO:0030879//mammary gland…
MergePeak_8775	22	49300569	49301246	0.0088	0.124	59	45	50	30	42	23	1.59	2.08	3.7	1.04	1.26	1.02	2.46	1.11	-1.1481	Intron (ENSBGRT00000024946/ENSBGRG00000013609, intron 1 of 2)	49299516	49309407	9892	+	ENSBGRG00000013609	ENSBGRT00000024946	49299516	49309407	9892	+	ENSBGRG00000013609	ENSBGRT00000024946	1391	BRK1	BRICK1 subunit of SCAR/WAVE actin nucleating complex [Source:HGNC Symbol;Acc:HGNC:23057]	Human Diseases;Human Diseases;Cellular Processes	Infectious diseases;Infectious diseases;Cell motility	ko05132//Salmonella infection;ko05130//Pathogenic Escherichia coli infection;ko04810//Regulation of actin cytoskeleton	K05752;K05752;K05752	GO:0030027//lamellipodium;GO:0031209//SCAR complex	GO:0042802//identical protein binding;GO:0044877//protein-containing complex binding;GO:0048365//Rac GTPase binding	GO:0001701//in utero embryonic development;GO:0007015//actin filament organization;GO:0008284//positive regulation of cell proliferation;GO:0010592//positive regulation of lamellipodium assembly;GO:0016601//Rac protein signal transduction;GO:0030036//actin cytoskeleton organization;GO:0031334//positive regulation of protein complex assembly;GO:0048870//cell motility;GO:2000601//positive regulatio…
MergePeak_13433	5	82139169	82139609	0.0114	0.128	96	33	43	27	39	32	3.98	2.35	4.89	1.45	1.8	2.18	3.74	1.81	-1.04705	Intron (ENSBGRT00000008840/ENSBGRG00000004717, intron 2 of 29)	82124130	82140287	16158	-	ENSBGRG00000004717	ENSBGRT00000008840	82124130	82140287	16158	-	ENSBGRG00000004717	ENSBGRT00000008840	898	ITGA5	integrin subunit alpha 5 [Source:HGNC Symbol;Acc:HGNC:6141]	Human Diseases;Environmental Information Processing;Human Diseases;Human Diseases;Cellular Processes;Human Diseases;Cellular Processes;Human Diseases;Cellular Processes;Human Diseases;Human Diseases;Organismal Systems;Human Diseases;Human Diseases;Human Diseases;Environmental Information Processing;Human Diseases	Infectious diseases;Signal transduction;Infectious diseases;Infectious diseases;Cell motility;Cancers;Cellular community - eukaryotes;Infectious disease: bacterial;Transport and catabolism;Cancers;Cardiovascular diseases;Immune system;Infectious diseases;Cardiovascular diseases;Cardiovascular diseases;Signaling molecules and interaction;Infectious diseases	ko05168//Herpes simplex infection;ko04151//PI3K-Akt signaling pathway;ko05165//Human papillomavirus infection;ko05131//Shigellosis;ko04810//Regulation of actin cytoskeleton;ko05205//Proteoglycans in cancer;ko04510//Focal adhesion;ko05135//Yersinia infection;ko04145//Phagosome;ko05206//MicroRNAs in cancer;ko05414//Dilated cardiomyopathy (DCM);ko04640//Hematopoietic cell lineage;ko05100//Bacterial …	K06484;K06484;K06484;K06484;K06484;K06484;K06484;K06484;K06484;K06484;K06484;K06484;K06484;K06484;K06484;K06484;K06484	GO:0005783//endoplasmic reticulum;GO:0005794//Golgi apparatus;GO:0005886//plasma membrane;GO:0005911//cell-cell junction;GO:0005925//focal adhesion;GO:0008305//integrin complex;GO:0009897//external side of plasma membrane;GO:0009986//cell surface;GO:0031410//cytoplasmic vesicle;GO:0032587//ruffle membrane;GO:0034674//integrin alpha5-beta1 complex;GO:0045202//synapse	GO:0005178//integrin binding	GO:0007044//cell-substrate junction assembly;GO:0007155//cell adhesion;GO:0007157//heterophilic cell-cell adhesion via plasma membrane cell adhesion molecules;GO:0007159//leukocyte cell-cell adhesion;GO:0007229//integrin-mediated signaling pathway;GO:0007613//memory;GO:0023035//CD40 signaling pathway;GO:0031589//cell-substrate adhesion;GO:0033627//cell adhesion mediated by integrin;GO:0033631//ce…
MergePeak_12858	4	118072416	118073014	0.012	0.128	89	43	42	24	33	41	2.71	2.25	3.51	0.95	1.12	2.05	2.82	1.37	-1.04152	Promoter (<=1kb)	118027787	118072551	44765	-	ENSBGRG00000013466	ENSBGRT00000025804	118027787	118072551	44765	-	ENSBGRG00000013466	ENSBGRT00000027197	-164	COL1A2	collagen type I alpha 2 chain [Source:HGNC Symbol;Acc:HGNC:2198]	Environmental Information Processing;Human Diseases;Human Diseases;Cellular Processes;Organismal Systems;Human Diseases;Organismal Systems;Organismal Systems;Human Diseases;Environmental Information Processing	Signal transduction;Infectious diseases;Cancers;Cellular community - eukaryotes;Endocrine system;Infectious diseases;Immune system;Digestive system;Endocrine and metabolic diseases;Signaling molecules and interaction	ko04151//PI3K-Akt signaling pathway;ko05165//Human papillomavirus infection;ko05205//Proteoglycans in cancer;ko04510//Focal adhesion;ko04926//Relaxin signaling pathway;ko05146//Amoebiasis;ko04611//Platelet activation;ko04974//Protein digestion and absorption;ko04933//AGE-RAGE signaling pathway in diabetic complications;ko04512//ECM-receptor interaction	K06236;K06236;K06236;K06236;K06236;K06236;K06236;K06236;K06236;K06236	GO:0005581//collagen trimer;GO:0005584//collagen type I trimer;GO:0005615//extracellular space;GO:0005783//endoplasmic reticulum	GO:0002020//protease binding;GO:0005201//extracellular matrix structural constituent;GO:0030674//protein binding, bridging;GO:0042802//identical protein binding;GO:0046332//SMAD binding;GO:0048407//platelet-derived growth factor binding	GO:0001501//skeletal system development;GO:0001568//blood vessel development;GO:0007179//transforming growth factor beta receptor signaling pathway;GO:0007266//Rho protein signal transduction;GO:0008217//regulation of blood pressure;GO:0030199//collagen fibril organization;GO:0030282//bone mineralization;GO:0032963//collagen metabolic process;GO:0043589//skin morphogenesis;GO:0070208//protein het…
MergePeak_5991	19	13436044	13436464	0.0158	0.136	77	37	58	27	30	43	3.34	2.76	6.91	1.51	1.45	3.07	4.34	2.01	-1.1105	Intron (ENSBGRT00000045878/ENSBGRG00000024535, intron 6 of 13)	13382594	13451221	68628	+	ENSBGRG00000024535	ENSBGRT00000045878	13382594	13451221	68628	+	ENSBGRG00000024535	ENSBGRT00000045878	53660	BAIAP2	BAR/IMD domain containing adaptor protein 2 [Source:HGNC Symbol;Acc:HGNC:947]	Human Diseases;Cellular Processes;Human Diseases;Cellular Processes	Infectious diseases;Cell motility;Infectious disease: bacterial;Cellular community - eukaryotes	ko05130//Pathogenic Escherichia coli infection;ko04810//Regulation of actin cytoskeleton;ko05135//Yersinia infection;ko04520//Adherens junction	K05627;K05627;K05627;K05627	GO:0005829//cytosol;GO:0005886//plasma membrane;GO:0015629//actin cytoskeleton;GO:0043005//neuron projection;GO:0098685//Schaffer collateral - CA1 synapse	GO:0005515//protein binding;GO:0008093//cytoskeletal adaptor activity;GO:0042802//identical protein binding;GO:0070064//proline-rich region binding	GO:0007009//plasma membrane organization;GO:0008360//regulation of cell shape;GO:0009617//response to bacterium;GO:0016358//dendrite development;GO:0032956//regulation of actin cytoskeleton organization;GO:0048167//regulation of synaptic plasticity;GO:0050804//modulation of chemical synaptic transmission;GO:0051017//actin filament bundle assembly;GO:0051764//actin crosslink formation;GO:0099564//…
MergePeak_12889	4	121495582	121496028	0.0219	0.144	63	35	51	43	22	27	2.58	2.46	5.72	2.27	1	1.81	3.59	1.69	-1.08696	Promoter (<=1kb)	121493382	121495319	1938	-	ENSBGRG00000019940	ENSBGRT00000036632	121493382	121495319	1938	-	ENSBGRG00000019940	ENSBGRT00000036632	-486	FZD1	frizzled class receptor 1 [Source:HGNC Symbol;Acc:HGNC:4038]	Human Diseases;Human Diseases;Human Diseases;Human Diseases;Environmental Information Processing;Human Diseases;Human Diseases;Environmental Information Processing;Environmental Information Processing;Human Diseases;Human Diseases;Cellular Processes;Organismal Systems;Human Diseases	Cancers;Neurodegenerative diseases;Infectious diseases;Cancers;Signal transduction;Cancers;Cancers;Signal transduction;Signal transduction;Endocrine and metabolic diseases;Cancers;Cellular community - eukaryotes;Endocrine system;Cancers	ko05200//Pathways in cancer;ko05010//Alzheimer disease;ko05165//Human papillomavirus infection;ko05205//Proteoglycans in cancer;ko04390//Hippo signaling pathway;ko05226//Gastric cancer;ko05225//Hepatocellular carcinoma;ko04150//mTOR signaling pathway;ko04310//Wnt signaling pathway;ko04934//Cushing syndrome;ko05224//Breast cancer;ko04550//Signaling pathways regulating pluripotency of stem cells;ko…	K02432;K02432;K02432;K02432;K02432;K02432;K02432;K02432;K02432;K02432;K02432;K02432;K02432;K02432	GO:0009986//cell surface;GO:0016020//membrane;GO:0016021//integral component of membrane	GO:0004888//transmembrane signaling receptor activity;GO:0005102//signaling receptor binding;GO:0005109//frizzled binding;GO:0005515//protein binding;GO:0017147//Wnt-protein binding;GO:0030165//PDZ domain binding;GO:0042813//Wnt-activated receptor activity	GO:0007166//cell surface receptor signaling pathway;GO:0007267//cell-cell signaling;GO:0016055//Wnt signaling pathway;GO:0035425//autocrine signaling;GO:0042493//response to drug;GO:0044338//canonical Wnt signaling pathway involved in mesenchymal stem cell differentiation;GO:0044339//canonical Wnt signaling pathway involved in osteoblast differentiation;GO:0045893//positive regulation of transcri…
MergePeak_13703	5	120506656	120507045	0.0288	0.154	42	47	49	33	24	33	1.97	3.78	6.3	2	1.25	2.54	4.02	1.93	-1.05859	Intron (ENSBGRT00000011615/ENSBGRG00000006304, intron 1 of 2)	120505649	120510839	5191	+	ENSBGRG00000006304	ENSBGRT00000011615	120505649	120510839	5191	+	ENSBGRG00000006304	ENSBGRT00000011615	1201	RBX1	XP_004397484.1 PREDICTED: E3 ubiquitin-protein ligase RBX1 isoform X2 [Odobenus rosmarus divergens]	Human Diseases;Human Diseases;Human Diseases;Genetic Information Processing;Genetic Information Processing;Environmental Information Processing;Cellular Processes;Cellular Processes;Environmental Information Processing;Environmental Information Processing;Human Diseases;Genetic Information Processing;Environmental Information Processing;Organismal Systems	Cancers;Infectious disease: viral;Infectious diseases;Folding, sorting and degradation;Folding, sorting and degradation;Signal transduction;Cell growth and death;Cell growth and death;Signal transduction;Signal transduction;Cancers;Replication and repair;Signal transduction;Environmental adaptation	ko05200//Pathways in cancer;ko05170//Human immunodeficiency virus 1 infection;ko05131//Shigellosis;ko04141//Protein processing in endoplasmic reticulum;ko04120//Ubiquitin mediated proteolysis;ko04310//Wnt signaling pathway;ko04110//Cell cycle;ko04114//Oocyte meiosis;ko04066//HIF-1 signaling pathway;ko04350//TGF-beta signaling pathway;ko05211//Renal cell carcinoma;ko03420//Nucleotide excision repa…	K03868;K03868;K03868;K03868;K03868;K03868;K03868;K03868;K03868;K03868;K03868;K03868;K03868;K03868	-	GO:0008270//zinc ion binding	-
MergePeak_16168	9	14729370	14729739	0.000121	1	62	30	28	10	23	5	3.06	2.54	3.8	0.64	1.27	0.41	3.13	0.77	-2.02323	Intron (ENSBGRT00000009564/ENSBGRG00000005191, intron 1 of 10)	14719582	14830409	110828	+	ENSBGRG00000005191	ENSBGRT00000009564	14719582	14830409	110828	+	ENSBGRG00000005191	ENSBGRT00000009564	9972	RXRA	retinoid X receptor alpha [Source:HGNC Symbol;Acc:HGNC:10477]	Human Diseases;Environmental Information Processing;Human Diseases;Human Diseases;Human Diseases;Organismal Systems;Human Diseases;Organismal Systems;Organismal Systems;Human Diseases;Organismal Systems;Organismal Systems;Organismal Systems;Human Diseases;Human Diseases	Cancers;Signal transduction;Cancers;Endocrine and metabolic diseases;Cancers;Immune system;Infectious diseases;Endocrine system;Endocrine system;Cancers;Endocrine system;Digestive system;Endocrine system;Cancers;Cancers	ko05200//Pathways in cancer;ko04151//PI3K-Akt signaling pathway;ko05202//Transcriptional misregulation in cancers;ko04932//Non-alcoholic fatty liver disease (NAFLD);ko05226//Gastric cancer;ko04659//Th17 cell differentiation;ko05160//Hepatitis C;ko04919//Thyroid hormone signaling pathway;ko04928//Parathyroid hormone synthesis, secretion and action;ko05222//Small cell lung cancer;ko03320//PPAR sign…	K08524;K08524;K08524;K08524;K08524;K08524;K08524;K08524;K08524;K08524;K08524;K08524;K08524;K08524;K08524	GO:0000790//nuclear chromatin;GO:0005634//nucleus;GO:0032991//protein-containing complex;GO:0043235//receptor complex;GO:0090575//RNA polymerase II transcription factor complex	GO:0000977//RNA polymerase II regulatory region sequence-specific DNA binding;GO:0000978//RNA polymerase II proximal promoter sequence-specific DNA binding;GO:0001162//RNA polymerase II intronic transcription regulatory region sequence-specific DNA binding;GO:0001972//retinoic acid binding;GO:0003677//DNA binding;GO:0003690//double-stranded DNA binding;GO:0003700//DNA-binding transcription factor…	GO:0000122//negative regulation of transcription by RNA polymerase II;GO:0001701//in utero embryonic development;GO:0001890//placenta development;GO:0001893//maternal placenta development;GO:0006355//regulation of transcription, DNA-templated;GO:0006357//regulation of transcription by RNA polymerase II;GO:0007507//heart development;GO:0007566//embryo implantation;GO:0019048//modulation by virus o…
MergePeak_1637	11	17650247	17650623	0.000182	1	69	40	37	22	8	19	3.35	3.33	4.92	1.38	0.43	1.51	3.87	1.11	-1.80177	Intron (ENSBGRT00000015717/ENSBGRG00000008621, intron 1 of 12)	17438967	17751584	312618	-	ENSBGRG00000008621	ENSBGRT00000015717	17438967	17751584	312618	-	ENSBGRG00000008621	ENSBGRT00000015717	101149	SV2C	synaptic vesicle glycoprotein 2C [Source:HGNC Symbol;Acc:HGNC:30670]	Environmental Information Processing	Signaling molecules and interaction	ko04512//ECM-receptor interaction	K06258	GO:0016020//membrane;GO:0016021//integral component of membrane	GO:0022857//transmembrane transporter activity	GO:0007268//chemical synaptic transmission;GO:0055085//transmembrane transport
MergePeak_1286	10	69926283	69926665	0.000924	1	53	21	38	13	24	7	2.53	1.72	4.98	0.8	1.28	0.55	3.08	0.88	-1.80736	Intron (ENSBGRT00000027770/ENSBGRG00000015027, intron 12 of 13)	69695259	69932015	236757	+	ENSBGRG00000015027	ENSBGRT00000027770	69695259	69932015	236757	+	ENSBGRG00000015027	ENSBGRT00000027770	231215	ME1	malic enzyme 1 [Source:HGNC Symbol;Acc:HGNC:6983]	Metabolism;Metabolism;Organismal Systems;Metabolism	Global and overview maps;Global and overview maps;Endocrine system;Carbohydrate metabolism	ko01100//Metabolic pathways;ko01200//Carbon metabolism;ko03320//PPAR signaling pathway;ko00620//Pyruvate metabolism	K00029;K00029;K00029;K00029	-	GO:0004470//malic enzyme activity;GO:0004471//malate dehydrogenase (decarboxylating) (NAD+) activity;GO:0004473//malate dehydrogenase (decarboxylating) (NADP+) activity;GO:0030145//manganese ion binding;GO:0051287//NAD binding	GO:0006108//malate metabolic process;GO:0055114//oxidation-reduction process;GO:1902031//regulation of NADP metabolic process
MergePeak_11618	3	36900890	36901287	0.00153	1	56	47	22	20	19	17	2.57	3.71	2.77	1.19	0.97	1.28	3.02	1.15	-1.39291	Intron (ENSBGRT00000029045/ENSBGRG00000015783, intron 1 of 27)	36447436	36923907	476472	-	ENSBGRG00000015783	ENSBGRT00000029045	36447436	36923907	476472	-	ENSBGRG00000015783	ENSBGRT00000029045	22819	VAV3	vav guanine nucleotide exchange factor 3 [Source:HGNC Symbol;Acc:HGNC:12659]	Environmental Information Processing;Environmental Information Processing;Cellular Processes;Human Diseases;Cellular Processes;Organismal Systems;Human Diseases;Organismal Systems;Organismal Systems;Organismal Systems;Organismal Systems;Organismal Systems;Organismal Systems	Signal transduction;Signal transduction;Cell motility;Cancers;Cellular community - eukaryotes;Immune system;Infectious disease: bacterial;Immune system;Immune system;Immune system;Immune system;Immune system;Immune system	ko04015//Rap1 signaling pathway;ko04024//cAMP signaling pathway;ko04810//Regulation of actin cytoskeleton;ko05205//Proteoglycans in cancer;ko04510//Focal adhesion;ko04062//Chemokine signaling pathway;ko05135//Yersinia infection;ko04660//T cell receptor signaling pathway;ko04670//Leukocyte transendothelial migration;ko04650//Natural killer cell mediated cytotoxicity;ko04666//Fc gamma R-mediated ph…	K05730;K05730;K05730;K05730;K05730;K05730;K05730;K05730;K05730;K05730;K05730;K05730;K05730	GO:0001772//immunological synapse;GO:0005737//cytoplasm;GO:0005886//plasma membrane	GO:0005085//guanyl-nucleotide exchange factor activity;GO:0005089//Rho guanyl-nucleotide exchange factor activity;GO:0005154//epidermal growth factor receptor binding;GO:0005515//protein binding;GO:0030676//Rac guanyl-nucleotide exchange factor activity	GO:0006906//vesicle fusion;GO:0006974//cellular response to DNA damage stimulus;GO:0007229//integrin-mediated signaling pathway;GO:0007264//small GTPase mediated signal transduction;GO:0008361//regulation of cell size;GO:0016477//cell migration;GO:0030031//cell projection assembly;GO:0030032//lamellipodium assembly;GO:0030593//neutrophil chemotaxis;GO:0030890//positive regulation of B cell prolif…
MergePeak_11912	3	88640572	88641046	0.00155	1	65	33	34	24	10	20	2.5	2.18	3.59	1.19	0.43	1.26	2.76	0.96	-1.52356	Promoter (<=1kb)	88117872	88640440	522569	-	ENSBGRG00000016686	ENSBGRT00000030842	88117872	88640440	522569	-	ENSBGRG00000016686	ENSBGRT00000030842	-369	ROR1	receptor tyrosine kinase like orphan receptor 1 [Source:HGNC Symbol;Acc:HGNC:10256]	Environmental Information Processing	Signal transduction	ko04310//Wnt signaling pathway	K05122	GO:0005886//plasma membrane;GO:0043235//receptor complex;GO:0043679//axon terminus	GO:0004672//protein kinase activity;GO:0005515//protein binding;GO:0005524//ATP binding;GO:0017147//Wnt-protein binding;GO:0042813//Wnt-activated receptor activity	GO:0006468//protein phosphorylation;GO:0007169//transmembrane receptor protein tyrosine kinase signaling pathway;GO:0007605//sensory perception of sound;GO:0043123//positive regulation of I-kappaB kinase/NF-kappaB signaling;GO:0048839//inner ear development;GO:0051092//positive regulation of NF-kappaB transcription factor activity
MergePeak_8456	22	1425857	1426242	0.00311	1	61	34	47	22	25	25	2.89	2.76	6.11	1.35	1.32	1.95	3.92	1.54	-1.34792	Promoter (<=1kb)	1388407	1425994	37588	-	ENSBGRG00000012210	ENSBGRT00000022427	1388637	1425994	37358	-	ENSBGRG00000012210	ENSBGRT00000022635	-55	RUVBL1	RuvB like AAA ATPase 1 [Source:HGNC Symbol;Acc:HGNC:10474]	Environmental Information Processing	Signal transduction	ko04310//Wnt signaling pathway	K04499	GO:0000812//Swr1 complex;GO:0005634//nucleus;GO:0005654//nucleoplasm;GO:0005829//cytosol;GO:0031011//Ino80 complex;GO:0035267//NuA4 histone acetyltransferase complex;GO:0071339//MLL1 complex;GO:0097255//R2TP complex;GO:1990904//ribonucleoprotein complex	GO:0001094//TFIID-class transcription factor complex binding;GO:0003678//DNA helicase activity;GO:0003713//transcription coactivator activity;GO:0005524//ATP binding;GO:0016887//ATPase activity;GO:0017025//TBP-class protein binding;GO:0043139//5'-3' DNA helicase activity;GO:0043531//ADP binding;GO:0051117//ATPase binding	GO:0043967//histone H4 acetylation;GO:0043968//histone H2A acetylation;GO:0090263//positive regulation of canonical Wnt signaling pathway
MergePeak_2680	12	70238842	70239142	0.00312	1	46	29	15	14	13	9	2.8	3.03	2.5	1.1	0.88	0.9	2.78	0.96	-1.53398	Intron (ENSBGRT00000036268/ENSBGRG00000019666, intron 3 of 15)	70228753	70240904	12152	-	ENSBGRG00000019666	ENSBGRT00000036268	70228753	70240904	12152	-	ENSBGRG00000019666	ENSBGRT00000036268	1912	PLTP	phospholipid transfer protein [Source:HGNC Symbol;Acc:HGNC:9093]	Organismal Systems;Organismal Systems	Endocrine system;Digestive system	ko03320//PPAR signaling pathway;ko04979//Cholesterol metabolism	K08761;K08761	GO:0005615//extracellular space;GO:0034364//high-density lipoprotein particle	GO:0008289//lipid binding;GO:0008429//phosphatidylethanolamine binding;GO:0019992//diacylglycerol binding;GO:0031210//phosphatidylcholine binding;GO:0070300//phosphatidic acid binding;GO:0097001//ceramide binding;GO:0120019//intermembrane phosphotidylcholine transfer activity;GO:1901611//phosphatidylglycerol binding;GO:1904121//phosphatidylethanolamine transporter activity;GO:1990050//phosphatidi…	GO:0006629//lipid metabolic process;GO:0006869//lipid transport;GO:0010189//vitamin E biosynthetic process;GO:0010875//positive regulation of cholesterol efflux;GO:0015914//phospholipid transport;GO:0030317//flagellated sperm motility;GO:0034375//high-density lipoprotein particle remodeling;GO:0035627//ceramide transport;GO:0046836//glycolipid transport
MergePeak_7655	20	31829270	31829642	0.0045	1	86	21	27	13	16	24	4.22	1.77	3.63	0.82	0.87	1.93	3.21	1.21	-1.40757	Promoter (<=1kb)	31829968	31834556	4589	+	ENSBGRG00000013045	ENSBGRT00000023838	31829968	31834556	4589	+	ENSBGRG00000013045	ENSBGRT00000023838	-512	SIAH1	NP_001180122.1 E3 ubiquitin-protein ligase SIAH1 [Bos taurus]	Genetic Information Processing;Environmental Information Processing;Environmental Information Processing;Cellular Processes	Folding, sorting and degradation;Signal transduction;Signal transduction;Cell growth and death	ko04120//Ubiquitin mediated proteolysis;ko04310//Wnt signaling pathway;ko04013//MAPK signaling pathway - fly;ko04115//p53 signaling pathway	K04506;K04506;K04506;K04506	GO:0005634//nucleus	GO:0005515//protein binding;GO:0008270//zinc ion binding	GO:0006511//ubiquitin-dependent protein catabolic process;GO:0007275//multicellular organism development
MergePeak_14792	7	50038802	50039108	0.00507	1	36	19	23	16	9	7	2.15	1.94	3.76	1.23	0.6	0.69	2.62	0.84	-1.64111	Intron (ENSBGRT00000023490/ENSBGRG00000012611, intron 16 of 16)	49985351	50039336	53986	+	ENSBGRG00000012611	ENSBGRT00000023490	49985351	50039336	53986	+	ENSBGRG00000012611	ENSBGRT00000023490	53604	GSN	gelsolin [Source:HGNC Symbol;Acc:HGNC:4620]	Human Diseases;Cellular Processes;Organismal Systems	Cancers;Cell motility;Immune system	ko05203//Viral carcinogenesis;ko04810//Regulation of actin cytoskeleton;ko04666//Fc gamma R-mediated phagocytosis	K05768;K05768;K05768	GO:0002102//podosome;GO:0005576//extracellular region;GO:0005615//extracellular space;GO:0005634//nucleus;GO:0005737//cytoplasm;GO:0005829//cytosol;GO:0005886//plasma membrane;GO:0005925//focal adhesion;GO:0016528//sarcoplasm;GO:0030027//lamellipodium;GO:0030478//actin cap;GO:0030864//cortical actin cytoskeleton;GO:0045335//phagocytic vesicle	GO:0003779//actin binding;GO:0005509//calcium ion binding;GO:0045159//myosin II binding;GO:0051015//actin filament binding	GO:0006911//phagocytosis, engulfment;GO:0010628//positive regulation of gene expression;GO:0014891//striated muscle atrophy;GO:0016192//vesicle-mediated transport;GO:0030041//actin filament polymerization;GO:0031648//protein destabilization;GO:0042989//sequestering of actin monomers;GO:0045010//actin nucleation;GO:0046597//negative regulation of viral entry into host cell;GO:0051014//actin filame…
MergePeak_17026	X	93582311	93582795	0.00626	1	48	39	36	28	14	21	1.81	2.52	3.72	1.36	0.59	1.3	2.68	1.08	-1.3112	Promoter (1-2kb)	93584362	93594880	10519	+	ENSBGRG00000015517	ENSBGRT00000028639	93584362	93586373	2012	+	ENSBGRG00000015517	ENSBGRT00000028778	-1809	ARAF	A-Raf proto-oncogene, serine/threonine kinase [Source:HGNC Symbol;Acc:HGNC:646]	Human Diseases;Human Diseases;Environmental Information Processing;Cellular Processes;Human Diseases;Human Diseases;Human Diseases;Human Diseases;Human Diseases;Human Diseases;Human Diseases;Organismal Systems;Organismal Systems;Environmental Information Processing;Organismal Systems;Organismal Systems;Organismal Systems;Human Diseases;Human Diseases;Human Diseases;Human Diseases;Organismal Syste…	Cancers;Neurodegenerative diseases;Signal transduction;Cell motility;Cancers;Substance dependence;Cancers;Cancers;Infectious diseases;Infectious diseases;Cancers;Endocrine system;Circulatory system;Signal transduction;Immune system;Nervous system;Endocrine system;Cancers;Drug resistance;Cancers;Drug resistance;Endocrine system;Signal transduction;Cancers;Cancers;Cancers;Cancers;Cancers;Cancers;Ne…	ko05200//Pathways in cancer;ko05010//Alzheimer disease;ko04010//MAPK signaling pathway;ko04810//Regulation of actin cytoskeleton;ko05205//Proteoglycans in cancer;ko05034//Alcoholism;ko05226//Gastric cancer;ko05225//Hepatocellular carcinoma;ko05161//Hepatitis B;ko05160//Hepatitis C;ko05224//Breast cancer;ko04910//Insulin signaling pathway;ko04270//Vascular smooth muscle contraction;ko04068//FoxO s…	K08845;K08845;K08845;K08845;K08845;K08845;K08845;K08845;K08845;K08845;K08845;K08845;K08845;K08845;K08845;K08845;K08845;K08845;K08845;K08845;K08845;K08845;K08845;K08845;K08845;K08845;K08845;K08845;K08845;K08845;K08845;K08845;K08845;K08845	GO:0005739//mitochondrion	GO:0004672//protein kinase activity;GO:0005524//ATP binding	GO:0006468//protein phosphorylation;GO:0007165//signal transduction;GO:0035556//intracellular signal transduction
MergePeak_8389	21	48535118	48535433	0.00639	1	39	18	35	22	9	10	2.26	1.79	5.56	1.65	0.58	0.95	3.2	1.06	-1.59401	Intron (ENSBGRT00000045303/ENSBGRG00000024537, intron 10 of 11)	48485555	48543238	57684	+	ENSBGRG00000024537	ENSBGRT00000045303	48485555	48543238	57684	+	ENSBGRG00000024537	ENSBGRT00000045303	49720	SMAD4	SMAD family member 4 [Source:HGNC Symbol;Acc:HGNC:6770]	Human Diseases;Human Diseases;Environmental Information Processing;Human Diseases;Human Diseases;Organismal Systems;Human Diseases;Environmental Information Processing;Cellular Processes;Environmental Information Processing;Cellular Processes;Environmental Information Processing;Cellular Processes;Environmental Information Processing;Human Diseases;Human Diseases;Human Diseases;Human Diseases	Cancers;Infectious diseases;Signal transduction;Cancers;Cancers;Immune system;Infectious diseases;Signal transduction;Cellular community - eukaryotes;Signal transduction;Cell growth and death;Signal transduction;Cellular community - eukaryotes;Signal transduction;Endocrine and metabolic diseases;Cancers;Cancers;Cancers	ko05200//Pathways in cancer;ko05166//HTLV-I infection;ko04390//Hippo signaling pathway;ko05226//Gastric cancer;ko05225//Hepatocellular carcinoma;ko04659//Th17 cell differentiation;ko05161//Hepatitis B;ko04310//Wnt signaling pathway;ko04550//Signaling pathways regulating pluripotency of stem cells;ko04371//Apelin signaling pathway;ko04110//Cell cycle;ko04068//FoxO signaling pathway;ko04520//Adhere…	K04501;K04501;K04501;K04501;K04501;K04501;K04501;K04501;K04501;K04501;K04501;K04501;K04501;K04501;K04501;K04501;K04501;K04501	GO:0000790//nuclear chromatin;GO:0005634//nucleus;GO:0005654//nucleoplasm;GO:0005667//transcription factor complex;GO:0005737//cytoplasm;GO:0005813//centrosome;GO:0005829//cytosol;GO:0032444//activin responsive factor complex;GO:0071141//SMAD protein complex;GO:0090575//RNA polymerase II transcription factor complex	GO:0000977//RNA polymerase II regulatory region sequence-specific DNA binding;GO:0000978//RNA polymerase II proximal promoter sequence-specific DNA binding;GO:0000987//proximal promoter sequence-specific DNA binding;GO:0001085//RNA polymerase II transcription factor binding;GO:0001223//transcription coactivator binding;GO:0001228//DNA-binding transcription activator activity, RNA polymerase II-sp…	GO:0000122//negative regulation of transcription by RNA polymerase II;GO:0001541//ovarian follicle development;GO:0001658//branching involved in ureteric bud morphogenesis;GO:0001666//response to hypoxia;GO:0001701//in utero embryonic development;GO:0001702//gastrulation with mouth forming second;GO:0001822//kidney development;GO:0003148//outflow tract septum morphogenesis;GO:0003190//atrioventri…
MergePeak_312	1	73730201	73730639	0.00672	1	39	20	28	7	27	3	1.62	1.43	3.2	0.38	1.25	0.21	2.08	0.61	-1.7697	Intron (ENSBGRT00000015698/ENSBGRG00000008571, intron 23 of 36)	73669379	73992749	323371	-	ENSBGRG00000008571	ENSBGRT00000015698	73669379	73992749	323371	-	ENSBGRG00000008571	ENSBGRT00000015698	262329	MYLK	myosin light chain kinase [Source:HGNC Symbol;Acc:HGNC:7590]	Environmental Information Processing;Cellular Processes;Cellular Processes;Environmental Information Processing;Organismal Systems;Environmental Information Processing;Organismal Systems;Organismal Systems;Organismal Systems	Signal transduction;Cell motility;Cellular community - eukaryotes;Signal transduction;Endocrine system;Signal transduction;Circulatory system;Immune system;Digestive system	ko04020//Calcium signaling pathway;ko04810//Regulation of actin cytoskeleton;ko04510//Focal adhesion;ko04022//cGMP - PKG signaling pathway;ko04921//Oxytocin signaling pathway;ko04371//Apelin signaling pathway;ko04270//Vascular smooth muscle contraction;ko04611//Platelet activation;ko04971//Gastric acid secretion	K00907;K00907;K00907;K00907;K00907;K00907;K00907;K00907;K00907	GO:0001725//stress fiber;GO:0005737//cytoplasm;GO:0005886//plasma membrane;GO:0015629//actin cytoskeleton;GO:0030027//lamellipodium;GO:0032154//cleavage furrow	GO:0004672//protein kinase activity;GO:0004687//myosin light chain kinase activity;GO:0005515//protein binding;GO:0005524//ATP binding	GO:0006468//protein phosphorylation;GO:0030335//positive regulation of cell migration;GO:0032060//bleb assembly;GO:0051928//positive regulation of calcium ion transport;GO:0060414//aorta smooth muscle tissue morphogenesis;GO:0071476//cellular hypotonic response;GO:0090303//positive regulation of wound healing
MergePeak_9960	25	50841886	50842465	0.00787	1	57	35	21	23	11	19	1.8	1.89	1.81	0.94	0.39	0.98	1.83	0.77	-1.24891	Intron (ENSBGRT00000019035/ENSBGRG00000009636, intron 2 of 52)	50770025	51418167	648143	+	ENSBGRG00000009636	ENSBGRT00000019035	50770025	51418167	648143	+	ENSBGRG00000009636	ENSBGRT00000019035	72150	DOCK1	dedicator of cytokinesis 1 [Source:HGNC Symbol;Acc:HGNC:2987]	Human Diseases;Cellular Processes;Cellular Processes;Human Diseases;Human Diseases	Infectious diseases;Cell motility;Cellular community - eukaryotes;Infectious disease: bacterial;Infectious diseases	ko05131//Shigellosis;ko04810//Regulation of actin cytoskeleton;ko04510//Focal adhesion;ko05135//Yersinia infection;ko05100//Bacterial invasion of epithelial cells	K13708;K13708;K13708;K13708;K13708	GO:0005654//nucleoplasm;GO:0005829//cytosol;GO:0016607//nuclear speck	GO:0005085//guanyl-nucleotide exchange factor activity;GO:0005096//GTPase activator activity;GO:0005515//protein binding	GO:0002244//hematopoietic progenitor cell differentiation;GO:0007264//small GTPase mediated signal transduction;GO:0016477//cell migration
MergePeak_13791	6	1876628	1877064	0.00866	1	54	32	27	18	29	15	2.26	2.3	3.1	0.97	1.35	1.03	2.55	1.12	-1.187	Intron (ENSBGRT00000018230/ENSBGRG00000009913, intron 11 of 19)	1857727	1920022	62296	-	ENSBGRG00000009913	ENSBGRT00000018230	1857727	1920022	62296	-	ENSBGRG00000009913	ENSBGRT00000018230	43176	ACOX3	acyl-CoA oxidase 3, pristanoyl [Source:HGNC Symbol;Acc:HGNC:121]	Metabolism;Environmental Information Processing;Metabolism;Cellular Processes;Organismal Systems;Metabolism;Metabolism;Metabolism;Metabolism;Metabolism;Metabolism	Global and overview maps;Signal transduction;Global and overview maps;Transport and catabolism;Endocrine system;Global and overview maps;Lipid metabolism;Carbohydrate metabolism;Metabolism of other amino acids;Lipid metabolism;Lipid metabolism	ko01100//Metabolic pathways;ko04024//cAMP signaling pathway;ko01200//Carbon metabolism;ko04146//Peroxisome;ko03320//PPAR signaling pathway;ko01212//Fatty acid metabolism;ko00071//Fatty acid degradation;ko00640//Propanoate metabolism;ko00410//beta-Alanine metabolism;ko00592//alpha-Linolenic acid metabolism;ko01040//Biosynthesis of unsaturated fatty acids	K00232;K00232;K00232;K00232;K00232;K00232;K00232;K00232;K00232;K00232;K00232	GO:0005777//peroxisome	GO:0003997//acyl-CoA oxidase activity;GO:0016627//oxidoreductase activity, acting on the CH-CH group of donors;GO:0071949//FAD binding	GO:0006631//fatty acid metabolic process;GO:0006635//fatty acid beta-oxidation;GO:0055114//oxidation-reduction process
MergePeak_5191	17	65828396	65828781	0.00886	1	34	21	27	19	11	9	1.61	1.71	3.51	1.16	0.58	0.7	2.28	0.81	-1.49304	Intron (ENSBGRT00000031754/ENSBGRG00000017338, intron 3 of 3)	65781748	65831592	49845	+	ENSBGRG00000017338	ENSBGRT00000031754	65781748	65831592	49845	+	ENSBGRG00000017338	ENSBGRT00000031754	46840	BDKRB2	bradykinin receptor B2 [Source:HGNC Symbol;Acc:HGNC:1030]	Human Diseases;Environmental Information Processing;Environmental Information Processing;Cellular Processes;Environmental Information Processing;Human Diseases;Environmental Information Processing;Organismal Systems;Organismal Systems;Organismal Systems	Cancers;Signaling molecules and interaction;Signal transduction;Cell motility;Signal transduction;Infectious diseases;Signal transduction;Sensory system;Immune system;Excretory system	ko05200//Pathways in cancer;ko04080//Neuroactive ligand-receptor interaction;ko04020//Calcium signaling pathway;ko04810//Regulation of actin cytoskeleton;ko04022//cGMP - PKG signaling pathway;ko05142//Chagas disease (American trypanosomiasis);ko04071//Sphingolipid signaling pathway;ko04750//Inflammatory mediator regulation of TRP channels;ko04610//Complement and coagulation cascades;ko04961//Endo…	K03916;K03916;K03916;K03916;K03916;K03916;K03916;K03916;K03916;K03916	GO:0005768//endosome;GO:0005886//plasma membrane;GO:0016021//integral component of membrane	GO:0002020//protease binding;GO:0004930//G protein-coupled receptor activity;GO:0004947//bradykinin receptor activity;GO:0031702//type 1 angiotensin receptor binding;GO:0046982//protein heterodimerization activity	GO:0006939//smooth muscle contraction;GO:0007186//G protein-coupled receptor signaling pathway;GO:0009651//response to salt stress;GO:0033137//negative regulation of peptidyl-serine phosphorylation;GO:0042310//vasoconstriction;GO:0042311//vasodilation;GO:0050482//arachidonic acid secretion;GO:1902219//negative regulation of intrinsic apoptotic signaling pathway in response to osmotic stress;GO:19…
MergePeak_4945	17	22960422	22960738	0.00948	1	65	36	31	30	12	24	3.75	3.57	4.91	2.24	0.77	2.28	4.08	1.76	-1.21299	Promoter (<=1kb)	22848044	22960291	112248	-	ENSBGRG00000009693	ENSBGRT00000018663	22848044	22960291	112248	-	ENSBGRG00000009693	ENSBGRT00000018747	-289	IQGAP1	IQ motif containing GTPase activating protein 1 [Source:HGNC Symbol;Acc:HGNC:6110]	Cellular Processes;Human Diseases;Cellular Processes	Cell motility;Cancers;Cellular community - eukaryotes	ko04810//Regulation of actin cytoskeleton;ko05205//Proteoglycans in cancer;ko04520//Adherens junction	K16848;K16848;K16848	GO:0001726//ruffle;GO:0005634//nucleus;GO:0005737//cytoplasm;GO:0005874//microtubule;GO:0005886//plasma membrane;GO:0005911//cell-cell junction;GO:0005925//focal adhesion;GO:0016328//lateral plasma membrane;GO:0030496//midbody;GO:0031234//extrinsic component of cytoplasmic side of plasma membrane;GO:0031252//cell leading edge;GO:0036464//cytoplasmic ribonucleoprotein granule;GO:0043005//neuron pr…	GO:0005078//MAP-kinase scaffold activity;GO:0005509//calcium ion binding;GO:0005515//protein binding;GO:0005516//calmodulin binding;GO:0005547//phosphatidylinositol-3,4,5-trisphosphate binding;GO:0017048//Rho GTPase binding;GO:0019901//protein kinase binding;GO:0019903//protein phosphatase binding;GO:0019904//protein domain specific binding;GO:0031267//small GTPase binding;GO:0043539//protein ser…	GO:0001817//regulation of cytokine production;GO:0007165//signal transduction;GO:0007173//epidermal growth factor receptor signaling pathway;GO:0007346//regulation of mitotic cell cycle;GO:0008543//fibroblast growth factor receptor signaling pathway;GO:0010761//fibroblast migration;GO:0016477//cell migration;GO:0035305//negative regulation of dephosphorylation;GO:0036120//cellular response to pla…
MergePeak_1636	11	17579799	17580046	0.00973	1	35	13	28	7	6	16	2.58	1.65	5.67	0.67	0.49	1.94	3.3	1.03	-1.67982	Intron (ENSBGRT00000015717/ENSBGRG00000008621, intron 2 of 12)	17438967	17751584	312618	-	ENSBGRG00000008621	ENSBGRT00000015717	17438967	17751584	312618	-	ENSBGRG00000008621	ENSBGRT00000015717	171662	SV2C	synaptic vesicle glycoprotein 2C [Source:HGNC Symbol;Acc:HGNC:30670]	Environmental Information Processing	Signaling molecules and interaction	ko04512//ECM-receptor interaction	K06258	GO:0016020//membrane;GO:0016021//integral component of membrane	GO:0022857//transmembrane transporter activity	GO:0007268//chemical synaptic transmission;GO:0055085//transmembrane transport
MergePeak_12452	4	34940737	34941200	0.0121	1	68	18	33	18	35	5	2.68	1.22	3.57	0.92	1.54	0.32	2.49	0.93	-1.42084	Intron (ENSBGRT00000045457/ENSBGRG00000024616, intron 1 of 9)	34916128	34989712	73585	+	ENSBGRG00000024616	ENSBGRT00000045457	34916128	34989712	73585	+	ENSBGRG00000024616	ENSBGRT00000045457	24840	WASL	WASP like actin nucleation promoting factor [Source:HGNC Symbol;Acc:HGNC:12735]	Human Diseases;Cellular Processes;Human Diseases;Human Diseases;Cellular Processes;Human Diseases;Human Diseases;Cellular Processes	Infectious diseases;Transport and catabolism;Infectious diseases;Infectious diseases;Cell motility;Infectious disease: bacterial;Infectious diseases;Cellular community - eukaryotes	ko05131//Shigellosis;ko04144//Endocytosis;ko05132//Salmonella infection;ko05130//Pathogenic Escherichia coli infection;ko04810//Regulation of actin cytoskeleton;ko05135//Yersinia infection;ko05100//Bacterial invasion of epithelial cells;ko04520//Adherens junction	K23612;K23612;K23612;K23612;K23612;K23612;K23612;K23612	GO:0005634//nucleus;GO:0005829//cytosol;GO:0030027//lamellipodium;GO:0030478//actin cap	GO:0003779//actin binding	GO:0007015//actin filament organization;GO:0009617//response to bacterium;GO:0030036//actin cytoskeleton organization;GO:0030041//actin filament polymerization;GO:0032880//regulation of protein localization;GO:0034629//cellular protein-containing complex localization;GO:0045944//positive regulation of transcription by RNA polymerase II;GO:0051653//spindle localization;GO:0060997//dendritic spine …
MergePeak_1284	10	69773426	69773685	0.0124	1	33	28	29	19	12	16	2.32	3.38	5.6	1.73	0.94	1.85	3.77	1.51	-1.32002	Intron (ENSBGRT00000027770/ENSBGRG00000015027, intron 3 of 13)	69695259	69932015	236757	+	ENSBGRG00000015027	ENSBGRT00000027770	69695259	69932015	236757	+	ENSBGRG00000015027	ENSBGRT00000027770	78296	ME1	malic enzyme 1 [Source:HGNC Symbol;Acc:HGNC:6983]	Metabolism;Metabolism;Organismal Systems;Metabolism	Global and overview maps;Global and overview maps;Endocrine system;Carbohydrate metabolism	ko01100//Metabolic pathways;ko01200//Carbon metabolism;ko03320//PPAR signaling pathway;ko00620//Pyruvate metabolism	K00029;K00029;K00029;K00029	-	GO:0004470//malic enzyme activity;GO:0004471//malate dehydrogenase (decarboxylating) (NAD+) activity;GO:0004473//malate dehydrogenase (decarboxylating) (NADP+) activity;GO:0030145//manganese ion binding;GO:0051287//NAD binding	GO:0006108//malate metabolic process;GO:0055114//oxidation-reduction process;GO:1902031//regulation of NADP metabolic process
MergePeak_12688	4	78042600	78042908	0.0137	1	53	26	22	22	22	10	3.14	2.64	3.57	1.68	1.45	0.97	3.12	1.37	-1.18737	Intron (ENSBGRT00000010044/ENSBGRG00000005449, intron 26 of 32)	77970006	78053945	83940	+	ENSBGRG00000005449	ENSBGRT00000010044	77970006	78053945	83940	+	ENSBGRG00000005449	ENSBGRT00000010044	72748	LAMB1	laminin subunit beta 1 [Source:HGNC Symbol;Acc:HGNC:6486]	Human Diseases;Environmental Information Processing;Human Diseases;Cellular Processes;Human Diseases;Human Diseases;Human Diseases;Environmental Information Processing	Cancers;Signal transduction;Infectious diseases;Cellular community - eukaryotes;Infectious diseases;Infectious diseases;Cancers;Signaling molecules and interaction	ko05200//Pathways in cancer;ko04151//PI3K-Akt signaling pathway;ko05165//Human papillomavirus infection;ko04510//Focal adhesion;ko05146//Amoebiasis;ko05145//Toxoplasmosis;ko05222//Small cell lung cancer;ko04512//ECM-receptor interaction	K05636;K05636;K05636;K05636;K05636;K05636;K05636;K05636	GO:0005604//basement membrane;GO:0005606//laminin-1 complex;GO:0005607//laminin-2 complex;GO:0005615//extracellular space;GO:0043257//laminin-8 complex;GO:0043259//laminin-10 complex	GO:0005201//extracellular matrix structural constituent	GO:0021812//neuronal-glial interaction involved in cerebral cortex radial glia guided migration;GO:0030335//positive regulation of cell migration;GO:0031175//neuron projection development;GO:0034446//substrate adhesion-dependent cell spreading;GO:0035987//endodermal cell differentiation;GO:0042476//odontogenesis
MergePeak_9783	25	24152213	24152648	0.0153	1	61	30	34	23	37	15	2.56	2.16	3.91	1.25	1.73	1.03	2.88	1.34	-1.10384	Intron (ENSBGRT00000047285/ENSBGRG00000025472, intron 4 of 13)	24016141	24200607	184467	+	ENSBGRG00000025472	ENSBGRT00000047285	24016141	24200607	184467	+	ENSBGRG00000025472	ENSBGRT00000047285	136289	BTRC	beta-transducin repeat containing E3 ubiquitin protein ligase [Source:HGNC Symbol;Acc:HGNC:1144]	Human Diseases;Human Diseases;Environmental Information Processing;Genetic Information Processing;Environmental Information Processing;Cellular Processes;Cellular Processes;Environmental Information Processing;Organismal Systems;Environmental Information Processing;Organismal Systems	Infectious disease: viral;Infectious diseases;Signal transduction;Folding, sorting and degradation;Signal transduction;Cell growth and death;Cell growth and death;Signal transduction;Immune system;Signal transduction;Environmental adaptation	ko05170//Human immunodeficiency virus 1 infection;ko05131//Shigellosis;ko04390//Hippo signaling pathway;ko04120//Ubiquitin mediated proteolysis;ko04310//Wnt signaling pathway;ko04218//Cellular senescence;ko04114//Oocyte meiosis;ko04340//Hedgehog signaling pathway;ko04624//Toll and Imd signaling pathway;ko04341//Hedgehog signaling pathway - fly;ko04710//Circadian rhythm	K03362;K03362;K03362;K03362;K03362;K03362;K03362;K03362;K03362;K03362;K03362	GO:0005634//nucleus;GO:0005737//cytoplasm;GO:0019005//SCF ubiquitin ligase complex	GO:0004842//ubiquitin-protein transferase activity;GO:0005515//protein binding;GO:0008013//beta-catenin binding;GO:0045309//protein phosphorylated amino acid binding;GO:0046983//protein dimerization activity;GO:0061630//ubiquitin protein ligase activity	GO:0000209//protein polyubiquitination;GO:0006470//protein dephosphorylation;GO:0006511//ubiquitin-dependent protein catabolic process;GO:0016567//protein ubiquitination;GO:0030163//protein catabolic process;GO:0031146//SCF-dependent proteasomal ubiquitin-dependent protein catabolic process;GO:0031648//protein destabilization;GO:0033598//mammary gland epithelial cell proliferation;GO:0042752//reg…
MergePeak_14266	6	115991482	115991960	0.0156	1	61	32	37	31	25	22	2.33	2.1	3.87	1.53	1.06	1.38	2.77	1.32	-1.06935	Promoter (1-2kb)	115657683	115990244	332562	-	ENSBGRG00000003179	ENSBGRT00000007082	115658828	115990244	331417	-	ENSBGRG00000003179	ENSBGRT00000007383	-1477	CAMK2D	calcium/calmodulin dependent protein kinase II delta [Source:HGNC Symbol;Acc:HGNC:1462]	Organismal Systems;Human Diseases;Environmental Information Processing;Environmental Information Processing;Human Diseases;Human Diseases;Organismal Systems;Cellular Processes;Environmental Information Processing;Human Diseases;Organismal Systems;Organismal Systems;Organismal Systems;Cellular Processes;Organismal Systems;Environmental Information Processing;Organismal Systems;Organismal Systems;O…	Sensory system;Cancers;Signal transduction;Signal transduction;Cancers;Infectious diseases;Development;Cell growth and death;Signal transduction;Endocrine and metabolic diseases;Circulatory system;Endocrine system;Nervous system;Cell growth and death;Nervous system;Signal transduction;Nervous system;Endocrine system;Environmental adaptation;Sensory system;Endocrine system;Endocrine system;Endocri…	ko04740//Olfactory transduction;ko05200//Pathways in cancer;ko04020//Calcium signaling pathway;ko04024//cAMP signaling pathway;ko05205//Proteoglycans in cancer;ko05152//Tuberculosis;ko04360//Axon guidance;ko04217//Necroptosis;ko04310//Wnt signaling pathway;ko04934//Cushing syndrome;ko04261//Adrenergic signaling in cardiomyocytes;ko04921//Oxytocin signaling pathway;ko04728//Dopaminergic synapse;ko…	K04515;K04515;K04515;K04515;K04515;K04515;K04515;K04515;K04515;K04515;K04515;K04515;K04515;K04515;K04515;K04515;K04515;K04515;K04515;K04515;K04515;K04515;K04515;K04515;K04515;K04515;K04515;K04515;K04515;K04515	-	GO:0004672//protein kinase activity;GO:0004683//calmodulin-dependent protein kinase activity;GO:0005516//calmodulin binding;GO:0005524//ATP binding	GO:0006468//protein phosphorylation
MergePeak_11228	29	36101342	36101664	0.0166	1	58	13	27	25	15	5	3.28	1.26	4.2	1.83	0.95	0.47	2.91	1.08	-1.42999	Intron (ENSBGRT00000047075/ENSBGRG00000025466, intron 6 of 13)	36022006	36302669	280664	-	ENSBGRG00000025466	ENSBGRT00000047075	36022006	36302669	280664	-	ENSBGRG00000025466	ENSBGRT00000047075	201166	ME3	malic enzyme 3 [Source:HGNC Symbol;Acc:HGNC:6985]	Metabolism;Metabolism;Organismal Systems;Metabolism	Global and overview maps;Global and overview maps;Endocrine system;Carbohydrate metabolism	ko01100//Metabolic pathways;ko01200//Carbon metabolism;ko03320//PPAR signaling pathway;ko00620//Pyruvate metabolism	K00029;K00029;K00029;K00029	-	GO:0004470//malic enzyme activity;GO:0004471//malate dehydrogenase (decarboxylating) (NAD+) activity;GO:0004473//malate dehydrogenase (decarboxylating) (NADP+) activity;GO:0051287//NAD binding	GO:0006090//pyruvate metabolic process;GO:0006108//malate metabolic process;GO:0055114//oxidation-reduction process
MergePeak_10639	27	29953958	29954218	0.0168	1	41	44	42	34	22	22	2.88	5.3	8.08	3.08	1.72	2.54	5.42	2.45	-1.14551	Intron (ENSBGRT00000032822/ENSBGRG00000014580, intron 5 of 20)	29916448	29981381	64934	-	ENSBGRG00000014580	ENSBGRT00000032822	29916448	29981381	64934	-	ENSBGRG00000014580	ENSBGRT00000032822	27293	CAMK2G	calcium/calmodulin dependent protein kinase II gamma [Source:HGNC Symbol;Acc:HGNC:1463]	Organismal Systems;Human Diseases;Environmental Information Processing;Environmental Information Processing;Human Diseases;Human Diseases;Organismal Systems;Cellular Processes;Environmental Information Processing;Human Diseases;Organismal Systems;Organismal Systems;Organismal Systems;Cellular Processes;Organismal Systems;Environmental Information Processing;Organismal Systems;Organismal Systems;O…	Sensory system;Cancers;Signal transduction;Signal transduction;Cancers;Infectious diseases;Development;Cell growth and death;Signal transduction;Endocrine and metabolic diseases;Circulatory system;Endocrine system;Nervous system;Cell growth and death;Nervous system;Signal transduction;Nervous system;Endocrine system;Environmental adaptation;Sensory system;Endocrine system;Endocrine system;Endocri…	ko04740//Olfactory transduction;ko05200//Pathways in cancer;ko04020//Calcium signaling pathway;ko04024//cAMP signaling pathway;ko05205//Proteoglycans in cancer;ko05152//Tuberculosis;ko04360//Axon guidance;ko04217//Necroptosis;ko04310//Wnt signaling pathway;ko04934//Cushing syndrome;ko04261//Adrenergic signaling in cardiomyocytes;ko04921//Oxytocin signaling pathway;ko04728//Dopaminergic synapse;ko…	K04515;K04515;K04515;K04515;K04515;K04515;K04515;K04515;K04515;K04515;K04515;K04515;K04515;K04515;K04515;K04515;K04515;K04515;K04515;K04515;K04515;K04515;K04515;K04515;K04515;K04515;K04515;K04515;K04515;K04515	GO:0014069//postsynaptic density	GO:0004672//protein kinase activity;GO:0004674//protein serine/threonine kinase activity;GO:0004683//calmodulin-dependent protein kinase activity;GO:0005516//calmodulin binding;GO:0005524//ATP binding	GO:0000082//G1/S transition of mitotic cell cycle;GO:0006468//protein phosphorylation;GO:0006816//calcium ion transport;GO:0010975//regulation of neuron projection development;GO:0046777//protein autophosphorylation;GO:1901897//regulation of relaxation of cardiac muscle
MergePeak_5860	19	692946	693265	0.0175	1	39	33	20	12	30	8	2.23	3.24	3.14	0.89	1.91	0.75	2.87	1.18	-1.28226	Intron (ENSBGRT00000033249/ENSBGRG00000018161, intron 5 of 17)	615851	967574	351724	-	ENSBGRG00000018161	ENSBGRT00000033249	615851	967574	351724	-	ENSBGRG00000018161	ENSBGRT00000033249	274469	PRKCA	protein kinase C alpha [Source:HGNC Symbol;Acc:HGNC:9393]	Human Diseases;Environmental Information Processing;Environmental Information Processing;Environmental Information Processing;Human Diseases;Environmental Information Processing;Environmental Information Processing;Human Diseases;Human Diseases;Cellular Processes;Human Diseases;Organismal Systems;Human Diseases;Environmental Information Processing;Human Diseases;Environmental Information Processi…	Cancers;Signal transduction;Signal transduction;Signal transduction;Infectious disease: viral;Signal transduction;Signal transduction;Infectious diseases;Cancers;Cellular community - eukaryotes;Infectious diseases;Development;Cancers;Signal transduction;Infectious diseases;Signal transduction;Signal transduction;Nervous system;Cancers;Circulatory system;Endocrine system;Immune system;Circulatory …	ko05200//Pathways in cancer;ko04151//PI3K-Akt signaling pathway;ko04014//Ras signaling pathway;ko04010//MAPK signaling pathway;ko05170//Human immunodeficiency virus 1 infection;ko04015//Rap1 signaling pathway;ko04020//Calcium signaling pathway;ko05163//Human cytomegalovirus infection;ko05205//Proteoglycans in cancer;ko04510//Focal adhesion;ko05164//Influenza A;ko04360//Axon guidance;ko05225//Hepa…	K02677;K02677;K02677;K02677;K02677;K02677;K02677;K02677;K02677;K02677;K02677;K02677;K02677;K02677;K02677;K02677;K02677;K02677;K02677;K02677;K02677;K02677;K02677;K02677;K02677;K02677;K02677;K02677;K02677;K02677;K02677;K02677;K02677;K02677;K02677;K02677;K02677;K02677;K02677;K02677;K02677;K02677;K02677;K02677;K02677;K02677;K02677;K02677;K02677;K02677;K02677;K02677;K02677;K02677;K02677;K02677;K02677;…	GO:0005737//cytoplasm;GO:0005783//endoplasmic reticulum;GO:0005829//cytosol;GO:0005886//plasma membrane	GO:0004672//protein kinase activity;GO:0004674//protein serine/threonine kinase activity;GO:0004697//protein kinase C activity;GO:0005524//ATP binding;GO:0008270//zinc ion binding;GO:0019899//enzyme binding;GO:0035403//histone kinase activity (H3-T6 specific)	GO:0001938//positive regulation of endothelial cell proliferation;GO:0002159//desmosome assembly;GO:0006468//protein phosphorylation;GO:0010595//positive regulation of endothelial cell migration;GO:0030335//positive regulation of cell migration;GO:0031666//positive regulation of lipopolysaccharide-mediated signaling pathway;GO:0034351//negative regulation of glial cell apoptotic process;GO:003540…
MergePeak_12322	4	17281331	17281678	0.0187	1	39	33	20	17	8	20	2.05	2.98	2.88	1.15	0.47	1.73	2.64	1.12	-1.23704	Intron (ENSBGRT00000000720/ENSBGRG00000000301, intron 13 of 18)	17132793	17304101	171309	+	ENSBGRG00000000301	ENSBGRT00000000720	17132793	17304101	171309	+	ENSBGRG00000000301	ENSBGRT00000000720	148711	BRAF	B-Raf proto-oncogene, serine/threonine kinase [Source:HGNC Symbol;Acc:HGNC:1097]	Human Diseases;Human Diseases;Environmental Information Processing;Environmental Information Processing;Environmental Information Processing;Cellular Processes;Human Diseases;Human Diseases;Cellular Processes;Organismal Systems;Human Diseases;Human Diseases;Environmental Information Processing;Human Diseases;Human Diseases;Human Diseases;Human Diseases;Organismal Systems;Organismal Systems;Enviro…	Cancers;Neurodegenerative diseases;Signal transduction;Signal transduction;Signal transduction;Cell motility;Cancers;Substance dependence;Cellular community - eukaryotes;Immune system;Cancers;Cancers;Signal transduction;Infectious diseases;Endocrine and metabolic diseases;Infectious diseases;Cancers;Endocrine system;Circulatory system;Signal transduction;Immune system;Nervous system;Nervous syste…	ko05200//Pathways in cancer;ko05010//Alzheimer disease;ko04010//MAPK signaling pathway;ko04015//Rap1 signaling pathway;ko04024//cAMP signaling pathway;ko04810//Regulation of actin cytoskeleton;ko05205//Proteoglycans in cancer;ko05034//Alcoholism;ko04510//Focal adhesion;ko04062//Chemokine signaling pathway;ko05226//Gastric cancer;ko05225//Hepatocellular carcinoma;ko04150//mTOR signaling pathway;ko…	K04365;K04365;K04365;K04365;K04365;K04365;K04365;K04365;K04365;K04365;K04365;K04365;K04365;K04365;K04365;K04365;K04365;K04365;K04365;K04365;K04365;K04365;K04365;K04365;K04365;K04365;K04365;K04365;K04365;K04365;K04365;K04365;K04365;K04365;K04365;K04365;K04365;K04365;K04365;K04365;K04365;K04365;K04365;K04365;K04365	GO:0005737//cytoplasm;GO:0005739//mitochondrion;GO:0005829//cytosol;GO:0005886//plasma membrane;GO:0043005//neuron projection;GO:0043231//intracellular membrane-bounded organelle;GO:0044297//cell body	GO:0004672//protein kinase activity;GO:0005524//ATP binding	GO:0002318//myeloid progenitor cell differentiation;GO:0006468//protein phosphorylation;GO:0007165//signal transduction;GO:0008542//visual learning;GO:0010628//positive regulation of gene expression;GO:0010764//negative regulation of fibroblast migration;GO:0030154//cell differentiation;GO:0030878//thyroid gland development;GO:0035019//somatic stem cell population maintenance;GO:0035556//intracel…
MergePeak_6866	2	23431901	23432217	0.0197	1	14	29	15	16	6	1	0.81	2.87	2.38	1.19	0.39	0.09	2.02	0.56	-1.85086	Intron (ENSBGRT00000023562/ENSBGRG00000012460, intron 4 of 47)	23407621	23557635	150015	+	ENSBGRG00000012460	ENSBGRT00000023562	23407621	23557635	150015	+	ENSBGRG00000012460	ENSBGRT00000023562	24438	COL4A4	collagen type IV alpha 4 chain [Source:HGNC Symbol;Acc:HGNC:2206]	Human Diseases;Environmental Information Processing;Human Diseases;Cellular Processes;Organismal Systems;Human Diseases;Organismal Systems;Human Diseases;Human Diseases;Environmental Information Processing	Cancers;Signal transduction;Infectious diseases;Cellular community - eukaryotes;Endocrine system;Infectious diseases;Digestive system;Cancers;Endocrine and metabolic diseases;Signaling molecules and interaction	ko05200//Pathways in cancer;ko04151//PI3K-Akt signaling pathway;ko05165//Human papillomavirus infection;ko04510//Focal adhesion;ko04926//Relaxin signaling pathway;ko05146//Amoebiasis;ko04974//Protein digestion and absorption;ko05222//Small cell lung cancer;ko04933//AGE-RAGE signaling pathway in diabetic complications;ko04512//ECM-receptor interaction	K06237;K06237;K06237;K06237;K06237;K06237;K06237;K06237;K06237;K06237	GO:0005581//collagen trimer;GO:0005587//collagen type IV trimer;GO:0005604//basement membrane	GO:0005201//extracellular matrix structural constituent	GO:0032836//glomerular basement membrane development
MergePeak_10644	27	30194705	30195003	0.0203	1	38	22	21	14	15	14	2.33	2.31	3.53	1.11	1.02	1.41	2.72	1.18	-1.20482	Intron (ENSBGRT00000034362/ENSBGRG00000018257, intron 6 of 21)	30113888	30230721	116834	+	ENSBGRG00000018257	ENSBGRT00000034362	30113888	30230721	116834	+	ENSBGRG00000018257	ENSBGRT00000034362	80966	VCL	vinculin [Source:HGNC Symbol;Acc:HGNC:12665]	Human Diseases;Cellular Processes;Cellular Processes;Organismal Systems;Human Diseases;Human Diseases;Cellular Processes	Infectious diseases;Cell motility;Cellular community - eukaryotes;Immune system;Infectious diseases;Infectious diseases;Cellular community - eukaryotes	ko05131//Shigellosis;ko04810//Regulation of actin cytoskeleton;ko04510//Focal adhesion;ko04670//Leukocyte transendothelial migration;ko05146//Amoebiasis;ko05100//Bacterial invasion of epithelial cells;ko04520//Adherens junction	K05700;K05700;K05700;K05700;K05700;K05700;K05700	GO:0002102//podosome;GO:0005737//cytoplasm;GO:0005886//plasma membrane;GO:0005911//cell-cell junction;GO:0005912//adherens junction;GO:0005916//fascia adherens;GO:0005925//focal adhesion;GO:0015629//actin cytoskeleton;GO:0032991//protein-containing complex;GO:0042383//sarcolemma;GO:0043034//costamere;GO:0044291//cell-cell contact zone	GO:0002162//dystroglycan binding;GO:0003779//actin binding;GO:0005198//structural molecule activity;GO:0031625//ubiquitin protein ligase binding;GO:0045294//alpha-catenin binding;GO:0051015//actin filament binding	GO:0002009//morphogenesis of an epithelium;GO:0007155//cell adhesion;GO:0030032//lamellipodium assembly;GO:0030334//regulation of cell migration;GO:0034333//adherens junction assembly;GO:0034394//protein localization to cell surface;GO:0043297//apical junction assembly;GO:0048675//axon extension;GO:0051893//regulation of focal adhesion assembly;GO:0090136//epithelial cell-cell adhesion;GO:1903140…
MergePeak_213	1	57025286	57025622	0.0219	1	46	28	16	15	18	15	2.5	2.61	2.38	1.05	1.09	1.34	2.5	1.16	-1.1078	Intron (ENSBGRT00000010083/ENSBGRG00000005454, intron 1 of 10)	56949731	57025901	76171	-	ENSBGRG00000005454	ENSBGRT00000010083	56949731	57025901	76171	-	ENSBGRG00000005454	ENSBGRT00000010083	447	CD47	CD47 molecule [Source:HGNC Symbol;Acc:HGNC:1682]	Environmental Information Processing	Signaling molecules and interaction	ko04512//ECM-receptor interaction	K06266	GO:0005887//integral component of plasma membrane;GO:0009986//cell surface;GO:0070062//extracellular exosome	GO:0070053//thrombospondin receptor activity;GO:0098632//cell-cell adhesion mediator activity	GO:0006954//inflammatory response;GO:0008228//opsonization;GO:0008284//positive regulation of cell proliferation;GO:0009617//response to bacterium;GO:0022409//positive regulation of cell-cell adhesion;GO:0032649//regulation of interferon-gamma production;GO:0032653//regulation of interleukin-10 production;GO:0032655//regulation of interleukin-12 production;GO:0032675//regulation of interleukin-6 …
MergePeak_8483	22	4766042	4766365	0.0228	1	24	23	26	16	15	10	1.35	2.23	4.03	1.17	0.94	0.93	2.54	1.01	-1.33047	Intron (ENSBGRT00000041363/ENSBGRG00000022315, intron 6 of 15)	4601887	4816796	214910	+	ENSBGRG00000022315	ENSBGRT00000041363	4601887	4816796	214910	+	ENSBGRG00000022315	ENSBGRT00000041363	164316	PPARG	XP_025127674.1 peroxisome proliferator-activated receptor gamma isoform X1 [Bubalus bubalis]	Human Diseases;Human Diseases;Organismal Systems;Human Diseases;Environmental Information Processing;Organismal Systems;Organismal Systems;Organismal Systems;Human Diseases	Cancers;Neurodegenerative diseases;Environmental adaptation;Cancers;Signal transduction;Development;Aging;Endocrine system;Cancers	ko05200//Pathways in cancer;ko05016//Huntington disease;ko04714//Thermogenesis;ko05202//Transcriptional misregulation in cancers;ko04152//AMPK signaling pathway;ko04380//Osteoclast differentiation;ko04211//Longevity regulating pathway - mammal;ko03320//PPAR signaling pathway;ko05216//Thyroid cancer	K08530;K08530;K08530;K08530;K08530;K08530;K08530;K08530;K08530	GO:0000214//tRNA-intron endonuclease complex;GO:0005634//nucleus	GO:0000213//tRNA-intron endonuclease activity;GO:0003676//nucleic acid binding;GO:0003677//DNA binding;GO:0003700//DNA-binding transcription factor activity;GO:0003707//steroid hormone receptor activity;GO:0004518//nuclease activity;GO:0004879//nuclear receptor activity;GO:0008270//zinc ion binding;GO:0043565//sequence-specific DNA binding	GO:0006355//regulation of transcription, DNA-templated;GO:0006388//tRNA splicing, via endonucleolytic cleavage and ligation
MergePeak_6927	2	32862909	32863144	0.0228	1	38	12	22	13	5	13	2.95	1.6	4.68	1.3	0.43	1.66	3.08	1.13	-1.44661	Downstream (1-2kb)	32864088	32907980	43893	-	ENSBGRG00000000784	ENSBGRT00000001448	32850574	32857819	7246	+	ENSBGRG00000000724	ENSBGRT00000001380	12452	CYP27A1	cytochrome P450 family 27 subfamily A member 1 [Source:HGNC Symbol;Acc:HGNC:2605]	Metabolism;Organismal Systems;Organismal Systems;Metabolism	Global and overview maps;Endocrine system;Digestive system;Lipid metabolism	ko01100//Metabolic pathways;ko03320//PPAR signaling pathway;ko04979//Cholesterol metabolism;ko00120//Primary bile acid biosynthesis	K00488;K00488;K00488;K00488	GO:0005739//mitochondrion	GO:0005506//iron ion binding;GO:0016705//oxidoreductase activity, acting on paired donors, with incorporation or reduction of molecular oxygen;GO:0020037//heme binding;GO:0030343//vitamin D3 25-hydroxylase activity;GO:0031073//cholesterol 26-hydroxylase activity;GO:0047749//cholestanetriol 26-monooxygenase activity	GO:0006699//bile acid biosynthetic process;GO:0006707//cholesterol catabolic process;GO:0036378//calcitriol biosynthetic process from calciol;GO:0055114//oxidation-reduction process
MergePeak_5992	19	13441295	13441709	0.0233	1	44	18	25	15	14	17	1.94	1.36	3.02	0.85	0.69	1.23	2.11	0.92	-1.19754	Intron (ENSBGRT00000045878/ENSBGRG00000024535, intron 7 of 13)	13382594	13451221	68628	+	ENSBGRG00000024535	ENSBGRT00000045878	13382594	13451221	68628	+	ENSBGRG00000024535	ENSBGRT00000045878	58908	BAIAP2	BAR/IMD domain containing adaptor protein 2 [Source:HGNC Symbol;Acc:HGNC:947]	Human Diseases;Cellular Processes;Human Diseases;Cellular Processes	Infectious diseases;Cell motility;Infectious disease: bacterial;Cellular community - eukaryotes	ko05130//Pathogenic Escherichia coli infection;ko04810//Regulation of actin cytoskeleton;ko05135//Yersinia infection;ko04520//Adherens junction	K05627;K05627;K05627;K05627	GO:0005829//cytosol;GO:0005886//plasma membrane;GO:0015629//actin cytoskeleton;GO:0043005//neuron projection;GO:0098685//Schaffer collateral - CA1 synapse	GO:0005515//protein binding;GO:0008093//cytoskeletal adaptor activity;GO:0042802//identical protein binding;GO:0070064//proline-rich region binding	GO:0007009//plasma membrane organization;GO:0008360//regulation of cell shape;GO:0009617//response to bacterium;GO:0016358//dendrite development;GO:0032956//regulation of actin cytoskeleton organization;GO:0048167//regulation of synaptic plasticity;GO:0050804//modulation of chemical synaptic transmission;GO:0051017//actin filament bundle assembly;GO:0051764//actin crosslink formation;GO:0099564//…
MergePeak_11984	3	101459271	101459599	0.0241	1	37	28	18	20	17	9	2.06	2.67	2.75	1.44	1.05	0.82	2.49	1.1	-1.17864	Intron (ENSBGRT00000005798/ENSBGRG00000003114, intron 15 of 15)	101423406	101645154	221749	-	ENSBGRG00000003114	ENSBGRT00000005798	101423406	101645154	221749	-	ENSBGRG00000003114	ENSBGRT00000005798	185719	SCP2	sterol carrier protein 2 [Source:HGNC Symbol;Acc:HGNC:10606]	Metabolism;Cellular Processes;Organismal Systems;Metabolism;Metabolism;Metabolism	Global and overview maps;Transport and catabolism;Endocrine system;Global and overview maps;Lipid metabolism;Lipid metabolism	ko01100//Metabolic pathways;ko04146//Peroxisome;ko03320//PPAR signaling pathway;ko01212//Fatty acid metabolism;ko01040//Biosynthesis of unsaturated fatty acids;ko00120//Primary bile acid biosynthesis	K08764;K08764;K08764;K08764;K08764;K08764	GO:0005654//nucleoplasm;GO:0005777//peroxisome;GO:0032991//protein-containing complex;GO:0043231//intracellular membrane-bounded organelle	GO:0000062//fatty-acyl-CoA binding;GO:0003824//catalytic activity;GO:0005102//signaling receptor binding;GO:0015485//cholesterol binding;GO:0016747//transferase activity, transferring acyl groups other than amino-acyl groups;GO:0036042//long-chain fatty acyl-CoA binding;GO:0070538//oleic acid binding	GO:0007031//peroxisome organization;GO:0032385//positive regulation of intracellular cholesterol transport;GO:1901373//lipid hydroperoxide transport
MergePeak_2718	12	75602256	75602708	0.0247	1	65	24	11	20	13	13	2.62	1.66	1.22	1.04	0.58	0.86	1.83	0.83	-1.14066	Intron (ENSBGRT00000009575/ENSBGRG00000005184, intron 6 of 10)	75532237	75715415	183179	-	ENSBGRG00000005184	ENSBGRT00000009575	75532237	75715415	183179	-	ENSBGRG00000005184	ENSBGRT00000009575	112933	NFATC2	nuclear factor of activated T cells 2 [Source:HGNC Symbol;Acc:HGNC:7776]	Human Diseases;Human Diseases;Human Diseases;Human Diseases;Human Diseases;Organismal Systems;Environmental Information Processing;Organismal Systems;Human Diseases;Environmental Information Processing;Cellular Processes;Organismal Systems;Organismal Systems;Organismal Systems;Human Diseases;Organismal Systems;Organismal Systems;Organismal Systems;Organismal Systems;Environmental Information Proc…	Infectious diseases;Infectious disease: viral;Infectious diseases;Infectious diseases;Infectious disease: bacterial;Development;Signal transduction;Immune system;Infectious diseases;Signal transduction;Cell growth and death;Immune system;Immune system;Endocrine system;Cancer: overview;Immune system;Development;Immune system;Immune system;Signal transduction	ko05166//HTLV-I infection;ko05170//Human immunodeficiency virus 1 infection;ko05163//Human cytomegalovirus infection;ko05167//Kaposi sarcoma-associated herpesvirus infection;ko05135//Yersinia infection;ko04360//Axon guidance;ko04022//cGMP - PKG signaling pathway;ko04659//Th17 cell differentiation;ko05161//Hepatitis B;ko04310//Wnt signaling pathway;ko04218//Cellular senescence;ko04660//T cell rece…	K17332;K17332;K17332;K17332;K17332;K17332;K17332;K17332;K17332;K17332;K17332;K17332;K17332;K17332;K17332;K17332;K17332;K17332;K17332;K17332	GO:0000790//nuclear chromatin;GO:0005634//nucleus;GO:0005654//nucleoplasm;GO:0005667//transcription factor complex;GO:0005737//cytoplasm;GO:0005829//cytosol;GO:0044798//nuclear transcription factor complex;GO:1990904//ribonucleoprotein complex	GO:0000976//transcription regulatory region sequence-specific DNA binding;GO:0000978//RNA polymerase II proximal promoter sequence-specific DNA binding;GO:0000981//DNA-binding transcription factor activity, RNA polymerase II-specific;GO:0001227//DNA-binding transcription repressor activity, RNA polymerase II-specific;GO:0001228//DNA-binding transcription activator activity, RNA polymerase II-spec…	GO:0000122//negative regulation of transcription by RNA polymerase II;GO:0001816//cytokine production;GO:0006355//regulation of transcription, DNA-templated;GO:0006974//cellular response to DNA damage stimulus;GO:0010628//positive regulation of gene expression;GO:0014904//myotube cell development;GO:0016477//cell migration;GO:0030890//positive regulation of B cell proliferation;GO:0033173//calcin…
MergePeak_12888	4	121491133	121491420	0.0255	1	39	26	15	19	11	11	2.48	2.84	2.62	1.56	0.78	1.15	2.65	1.16	-1.19187	Downstream (2-3kb)	121493382	121495319	1938	-	ENSBGRG00000019940	ENSBGRT00000036632	121493382	121495319	1938	-	ENSBGRG00000019940	ENSBGRT00000036632	4043	FZD1	frizzled class receptor 1 [Source:HGNC Symbol;Acc:HGNC:4038]	Human Diseases;Human Diseases;Human Diseases;Human Diseases;Environmental Information Processing;Human Diseases;Human Diseases;Environmental Information Processing;Environmental Information Processing;Human Diseases;Human Diseases;Cellular Processes;Organismal Systems;Human Diseases	Cancers;Neurodegenerative diseases;Infectious diseases;Cancers;Signal transduction;Cancers;Cancers;Signal transduction;Signal transduction;Endocrine and metabolic diseases;Cancers;Cellular community - eukaryotes;Endocrine system;Cancers	ko05200//Pathways in cancer;ko05010//Alzheimer disease;ko05165//Human papillomavirus infection;ko05205//Proteoglycans in cancer;ko04390//Hippo signaling pathway;ko05226//Gastric cancer;ko05225//Hepatocellular carcinoma;ko04150//mTOR signaling pathway;ko04310//Wnt signaling pathway;ko04934//Cushing syndrome;ko05224//Breast cancer;ko04550//Signaling pathways regulating pluripotency of stem cells;ko…	K02432;K02432;K02432;K02432;K02432;K02432;K02432;K02432;K02432;K02432;K02432;K02432;K02432;K02432	GO:0009986//cell surface;GO:0016020//membrane;GO:0016021//integral component of membrane	GO:0004888//transmembrane signaling receptor activity;GO:0005102//signaling receptor binding;GO:0005109//frizzled binding;GO:0005515//protein binding;GO:0017147//Wnt-protein binding;GO:0030165//PDZ domain binding;GO:0042813//Wnt-activated receptor activity	GO:0007166//cell surface receptor signaling pathway;GO:0007267//cell-cell signaling;GO:0016055//Wnt signaling pathway;GO:0035425//autocrine signaling;GO:0042493//response to drug;GO:0044338//canonical Wnt signaling pathway involved in mesenchymal stem cell differentiation;GO:0044339//canonical Wnt signaling pathway involved in osteoblast differentiation;GO:0045893//positive regulation of transcri…
MergePeak_7030	2	49600921	49601271	0.026	1	36	13	13	6	11	9	1.88	1.16	1.86	0.4	0.64	0.77	1.63	0.6	-1.44184	Intron (ENSBGRT00000027571/ENSBGRG00000014834, intron 1 of 11)	49544772	49656957	112186	-	ENSBGRG00000014834	ENSBGRT00000027571	49544772	49656957	112186	-	ENSBGRG00000014834	ENSBGRT00000027571	55861	ABI2	abl interactor 2 [Source:HGNC Symbol;Acc:HGNC:24011]	Cellular Processes	Cell motility	ko04810//Regulation of actin cytoskeleton	K05751	-	GO:0005515//protein binding	GO:0008154//actin polymerization or depolymerization
MergePeak_10065	26	7209477	7209792	0.0268	1	28	23	22	9	12	17	1.62	2.29	3.49	0.67	0.77	1.62	2.47	1.02	-1.27594	Promoter (<=1kb)	7209768	7228938	19171	+	ENSBGRG00000025342	ENSBGRT00000046856	7209768	7226489	16722	+	ENSBGRG00000025342	ENSBGRT00000046869	-134	PDGFA	XP_032461882.1 platelet-derived growth factor subunit A isoform X1 [Phocoena sinus]	Human Diseases;Environmental Information Processing;Environmental Information Processing;Environmental Information Processing;Environmental Information Processing;Human Diseases;Cellular Processes;Cellular Processes;Environmental Information Processing;Environmental Information Processing;Human Diseases;Human Diseases;Human Diseases;Human Diseases;Human Diseases;Cellular Processes;Human Diseases;…	Cancers;Signal transduction;Signal transduction;Signal transduction;Signal transduction;Cancers;Cell motility;Cellular community - eukaryotes;Signal transduction;Signal transduction;Cancers;Cardiovascular diseases;Cancers;Cancers;Drug resistance;Cellular community - eukaryotes;Cancers;Cancers	ko05200//Pathways in cancer;ko04151//PI3K-Akt signaling pathway;ko04014//Ras signaling pathway;ko04010//MAPK signaling pathway;ko04015//Rap1 signaling pathway;ko05202//Transcriptional misregulation in cancers;ko04810//Regulation of actin cytoskeleton;ko04510//Focal adhesion;ko04630//Jak-STAT signaling pathway;ko04072//Phospholipase D signaling pathway;ko05206//MicroRNAs in cancer;ko05418//Fluid s…	K04359;K04359;K04359;K04359;K04359;K04359;K04359;K04359;K04359;K04359;K04359;K04359;K04359;K04359;K04359;K04359;K04359;K04359	GO:0016020//membrane	GO:0008083//growth factor activity	-
MergePeak_1634	11	17123584	17123958	0.0291	1	54	26	32	20	23	25	2.63	2.18	4.28	1.26	1.25	2	3.03	1.5	-1.01435	Intron (ENSBGRT00000015453/ENSBGRG00000007931, intron 2 of 24)	17035941	17140428	104488	-	ENSBGRG00000007931	ENSBGRT00000015453	17035941	17140428	104488	-	ENSBGRG00000007931	ENSBGRT00000015453	16657	IQGAP2	IQ motif containing GTPase activating protein 2 [Source:HGNC Symbol;Acc:HGNC:6111]	Cellular Processes	Cell motility	ko04810//Regulation of actin cytoskeleton	K05767	GO:0005737//cytoplasm;GO:0005902//microvillus;GO:0009986//cell surface;GO:0030027//lamellipodium;GO:0030175//filopodium	GO:0005515//protein binding;GO:0005516//calmodulin binding;GO:0005547//phosphatidylinositol-3,4,5-trisphosphate binding;GO:0017048//Rho GTPase binding;GO:0048365//Rac GTPase binding;GO:0051015//actin filament binding;GO:0071933//Arp2/3 complex binding	GO:0007165//signal transduction;GO:0034314//Arp2/3 complex-mediated actin nucleation;GO:0043087//regulation of GTPase activity;GO:0070493//thrombin-activated receptor signaling pathway
MergePeak_12683	4	77808755	77809240	0.0294	1	57	25	37	11	23	32	2.14	1.61	3.82	0.53	0.96	1.98	2.52	1.16	-1.1193	Intron (ENSBGRT00000009995/ENSBGRG00000005405, intron 2 of 18)	77769862	77864869	95008	+	ENSBGRG00000005405	ENSBGRT00000009995	77769862	77864869	95008	+	ENSBGRG00000005405	ENSBGRT00000009995	39135	LAMB4	XP_010839804.1 PREDICTED: LOW QUALITY PROTEIN: laminin subunit beta-4 [Bison bison bison]	Human Diseases;Environmental Information Processing;Human Diseases;Cellular Processes;Human Diseases;Human Diseases;Human Diseases;Environmental Information Processing	Cancers;Signal transduction;Infectious diseases;Cellular community - eukaryotes;Infectious diseases;Infectious diseases;Cancers;Signaling molecules and interaction	ko05200//Pathways in cancer;ko04151//PI3K-Akt signaling pathway;ko05165//Human papillomavirus infection;ko04510//Focal adhesion;ko05146//Amoebiasis;ko05145//Toxoplasmosis;ko05222//Small cell lung cancer;ko04512//ECM-receptor interaction	K06245;K06245;K06245;K06245;K06245;K06245;K06245;K06245	-	-	-
MergePeak_9868	25	36173269	36173580	0.0296	1	36	19	28	18	15	15	2.11	1.91	4.5	1.36	0.98	1.45	2.84	1.26	-1.17247	Promoter (<=1kb)	36174020	36407788	233769	+	ENSBGRG00000020041	ENSBGRT00000043393	36174020	36401830	227811	+	ENSBGRG00000020041	ENSBGRT00000044210	-596	TCF7L2	transcription factor 7 like 2 [Source:HGNC Symbol;Acc:HGNC:11641]	Human Diseases;Human Diseases;Human Diseases;Environmental Information Processing;Human Diseases;Human Diseases;Environmental Information Processing;Human Diseases;Human Diseases;Human Diseases;Cellular Processes;Organismal Systems;Human Diseases;Human Diseases;Human Diseases;Human Diseases;Human Diseases;Human Diseases	Cancers;Infectious diseases;Infectious diseases;Signal transduction;Cancers;Cancers;Signal transduction;Endocrine and metabolic diseases;Cancers;Cardiovascular diseases;Cellular community - eukaryotes;Endocrine system;Cancers;Cancers;Cancers;Cancers;Cancers;Cancers	ko05200//Pathways in cancer;ko05165//Human papillomavirus infection;ko05132//Salmonella infection;ko04390//Hippo signaling pathway;ko05226//Gastric cancer;ko05225//Hepatocellular carcinoma;ko04310//Wnt signaling pathway;ko04934//Cushing syndrome;ko05224//Breast cancer;ko05412//Arrhythmogenic right ventricular cardiomyopathy (ARVC);ko04520//Adherens junction;ko04916//Melanogenesis;ko05215//Prostat…	K04491;K04491;K04491;K04491;K04491;K04491;K04491;K04491;K04491;K04491;K04491;K04491;K04491;K04491;K04491;K04491;K04491;K04491	GO:0000790//nuclear chromatin;GO:0005634//nucleus;GO:0005654//nucleoplasm;GO:0032993//protein-DNA complex;GO:0070369//beta-catenin-TCF7L2 complex	GO:0000978//RNA polymerase II proximal promoter sequence-specific DNA binding;GO:0001103//RNA polymerase II repressing transcription factor binding;GO:0003700//DNA-binding transcription factor activity;GO:0008013//beta-catenin binding;GO:0008134//transcription factor binding;GO:0019901//protein kinase binding;GO:0035257//nuclear hormone receptor binding;GO:0043565//sequence-specific DNA binding;G…	GO:0000122//negative regulation of transcription by RNA polymerase II;GO:0001568//blood vessel development;GO:0006357//regulation of transcription by RNA polymerase II;GO:0007050//cell cycle arrest;GO:0010909//positive regulation of heparan sulfate proteoglycan biosynthetic process;GO:0016055//Wnt signaling pathway;GO:0032024//positive regulation of insulin secretion;GO:0032092//positive regulati…
MergePeak_3884	14	81987989	81988311	0.0314	1	41	23	27	20	11	20	2.32	2.24	4.2	1.46	0.69	1.86	2.92	1.34	-1.12373	Promoter (<=1kb)	81794190	81988010	193821	-	ENSBGRG00000025577	ENSBGRT00000047290	81802161	81988010	185850	-	ENSBGRG00000025577	ENSBGRT00000047404	-140	PPP1R12B	protein phosphatase 1 regulatory subunit 12B [Source:HGNC Symbol;Acc:HGNC:7619]	Cellular Processes;Human Diseases;Cellular Processes;Organismal Systems;Organismal Systems	Cell motility;Cancers;Cellular community - eukaryotes;Endocrine system;Circulatory system	ko04810//Regulation of actin cytoskeleton;ko05205//Proteoglycans in cancer;ko04510//Focal adhesion;ko04921//Oxytocin signaling pathway;ko04270//Vascular smooth muscle contraction	K12329;K12329;K12329;K12329;K12329	-	GO:0005515//protein binding;GO:0019208//phosphatase regulator activity;GO:0019901//protein kinase binding	GO:0007165//signal transduction
MergePeak_6231	19	30436825	30437210	0.039	1	57	33	8	22	11	14	2.7	2.68	1.04	1.35	0.58	1.09	2.14	1.01	-1.08326	Exon (ENSBGRT00000010265/ENSBGRG00000005548, exon 30 of 49)	30428361	30448761	20401	-	ENSBGRG00000005548	ENSBGRT00000010265	30428361	30448761	20401	-	ENSBGRG00000005548	ENSBGRT00000010265	11744	COL1A1	XP_006041214.2 collagen alpha-1(I) chain [Bubalus bubalis]	Environmental Information Processing;Human Diseases;Human Diseases;Cellular Processes;Organismal Systems;Human Diseases;Organismal Systems;Organismal Systems;Human Diseases;Environmental Information Processing	Signal transduction;Infectious diseases;Cancers;Cellular community - eukaryotes;Endocrine system;Infectious diseases;Immune system;Digestive system;Endocrine and metabolic diseases;Signaling molecules and interaction	ko04151//PI3K-Akt signaling pathway;ko05165//Human papillomavirus infection;ko05205//Proteoglycans in cancer;ko04510//Focal adhesion;ko04926//Relaxin signaling pathway;ko05146//Amoebiasis;ko04611//Platelet activation;ko04974//Protein digestion and absorption;ko04933//AGE-RAGE signaling pathway in diabetic complications;ko04512//ECM-receptor interaction	K06236;K06236;K06236;K06236;K06236;K06236;K06236;K06236;K06236;K06236	-	GO:0005201//extracellular matrix structural constituent	-
MergePeak_10127	26	10313639	10313967	0.0395	1	33	21	16	13	12	13	1.83	2	2.44	0.93	0.74	1.19	2.09	0.95	-1.1375	Intron (ENSBGRT00000035839/ENSBGRG00000019391, intron 2 of 16)	10304748	10333790	29043	+	ENSBGRG00000019391	ENSBGRT00000035839	10304748	10333790	29043	+	ENSBGRG00000019391	ENSBGRT00000035839	9055	LIMK1	LIM domain kinase 1 [Source:HGNC Symbol;Acc:HGNC:6613]	Human Diseases;Cellular Processes;Human Diseases;Organismal Systems;Organismal Systems	Infectious disease: viral;Cell motility;Infectious disease: bacterial;Development;Immune system	ko05170//Human immunodeficiency virus 1 infection;ko04810//Regulation of actin cytoskeleton;ko05135//Yersinia infection;ko04360//Axon guidance;ko04666//Fc gamma R-mediated phagocytosis	K05743;K05743;K05743;K05743;K05743	GO:0005634//nucleus;GO:0005737//cytoplasm;GO:0005829//cytosol;GO:0005925//focal adhesion;GO:0016020//membrane;GO:0016607//nuclear speck;GO:0030027//lamellipodium;GO:0043005//neuron projection	GO:0004672//protein kinase activity;GO:0004674//protein serine/threonine kinase activity;GO:0005515//protein binding;GO:0005524//ATP binding;GO:0031072//heat shock protein binding	GO:0006468//protein phosphorylation;GO:0032233//positive regulation of actin filament bundle assembly;GO:0045773//positive regulation of axon extension;GO:0051444//negative regulation of ubiquitin-protein transferase activity;GO:0051496//positive regulation of stress fiber assembly
MergePeak_15783	8	67265111	67265452	0.0412	1	32	21	21	18	15	11	1.71	1.93	3.08	1.24	0.89	0.97	2.24	1.03	-1.12085	3' UTR	67264695	67343827	79133	-	ENSBGRG00000021420	ENSBGRT00000040156	67264695	67343827	79133	-	ENSBGRG00000021420	ENSBGRT00000040156	78546	CAMK2A	calcium/calmodulin dependent protein kinase II alpha [Source:HGNC Symbol;Acc:HGNC:1460]	Organismal Systems;Human Diseases;Environmental Information Processing;Environmental Information Processing;Human Diseases;Human Diseases;Organismal Systems;Cellular Processes;Environmental Information Processing;Human Diseases;Organismal Systems;Organismal Systems;Organismal Systems;Cellular Processes;Organismal Systems;Environmental Information Processing;Organismal Systems;Organismal Systems;O…	Sensory system;Cancers;Signal transduction;Signal transduction;Cancers;Infectious diseases;Development;Cell growth and death;Signal transduction;Endocrine and metabolic diseases;Circulatory system;Endocrine system;Nervous system;Cell growth and death;Nervous system;Signal transduction;Nervous system;Endocrine system;Environmental adaptation;Sensory system;Endocrine system;Endocrine system;Endocri…	ko04740//Olfactory transduction;ko05200//Pathways in cancer;ko04020//Calcium signaling pathway;ko04024//cAMP signaling pathway;ko05205//Proteoglycans in cancer;ko05152//Tuberculosis;ko04360//Axon guidance;ko04217//Necroptosis;ko04310//Wnt signaling pathway;ko04934//Cushing syndrome;ko04261//Adrenergic signaling in cardiomyocytes;ko04921//Oxytocin signaling pathway;ko04728//Dopaminergic synapse;ko…	K04515;K04515;K04515;K04515;K04515;K04515;K04515;K04515;K04515;K04515;K04515;K04515;K04515;K04515;K04515;K04515;K04515;K04515;K04515;K04515;K04515;K04515;K04515;K04515;K04515;K04515;K04515;K04515;K04515;K04515	GO:0005739//mitochondrion;GO:0014069//postsynaptic density;GO:0098685//Schaffer collateral - CA1 synapse	GO:0004672//protein kinase activity;GO:0004674//protein serine/threonine kinase activity;GO:0004683//calmodulin-dependent protein kinase activity;GO:0005516//calmodulin binding;GO:0005524//ATP binding;GO:0009931//calcium-dependent protein serine/threonine kinase activity;GO:0035254//glutamate receptor binding	GO:0000082//G1/S transition of mitotic cell cycle;GO:0002931//response to ischemia;GO:0006468//protein phosphorylation;GO:0006816//calcium ion transport;GO:0010666//positive regulation of cardiac muscle cell apoptotic process;GO:0018105//peptidyl-serine phosphorylation;GO:0046777//protein autophosphorylation;GO:0046928//regulation of neurotransmitter secretion;GO:0048168//regulation of neuronal s…
MergePeak_1572	11	10258653	10259186	0.0466	1	41	29	41	22	16	32	1.4	1.7	3.85	0.97	0.61	1.8	2.32	1.13	-1.0378	Intron (ENSBGRT00000044275/ENSBGRG00000023965, intron 1 of 9)	10215427	10349326	133900	-	ENSBGRG00000023965	ENSBGRT00000044275	10215427	10349326	133900	-	ENSBGRG00000023965	ENSBGRT00000044275	90407	SMAD3	SMAD family member 3 [Source:HGNC Symbol;Acc:HGNC:6769]	Human Diseases;Human Diseases;Cellular Processes;Environmental Information Processing;Human Diseases;Human Diseases;Organismal Systems;Human Diseases;Environmental Information Processing;Cellular Processes;Cellular Processes;Environmental Information Processing;Cellular Processes;Environmental Information Processing;Human Diseases;Cellular Processes;Environmental Information Processing;Human Dise…	Cancers;Infectious diseases;Transport and catabolism;Signal transduction;Cancers;Cancers;Immune system;Infectious diseases;Signal transduction;Cell growth and death;Cellular community - eukaryotes;Signal transduction;Cell growth and death;Signal transduction;Immune diseases;Cellular community - eukaryotes;Signal transduction;Endocrine and metabolic diseases;Cancers;Cancers;Cancers	ko05200//Pathways in cancer;ko05166//HTLV-I infection;ko04144//Endocytosis;ko04390//Hippo signaling pathway;ko05226//Gastric cancer;ko05225//Hepatocellular carcinoma;ko04659//Th17 cell differentiation;ko05161//Hepatitis B;ko04310//Wnt signaling pathway;ko04218//Cellular senescence;ko04550//Signaling pathways regulating pluripotency of stem cells;ko04371//Apelin signaling pathway;ko04110//Cell cyc…	K23605;K23605;K23605;K23605;K23605;K23605;K23605;K23605;K23605;K23605;K23605;K23605;K23605;K23605;K23605;K23605;K23605;K23605;K23605;K23605;K23605	GO:0000790//nuclear chromatin;GO:0005634//nucleus;GO:0005637//nuclear inner membrane;GO:0005654//nucleoplasm;GO:0005667//transcription factor complex;GO:0005737//cytoplasm;GO:0005829//cytosol;GO:0005886//plasma membrane;GO:0043235//receptor complex;GO:0071141//SMAD protein complex;GO:0071144//heteromeric SMAD protein complex	GO:0000977//RNA polymerase II regulatory region sequence-specific DNA binding;GO:0000978//RNA polymerase II proximal promoter sequence-specific DNA binding;GO:0000981//DNA-binding transcription factor activity, RNA polymerase II-specific;GO:0000987//proximal promoter sequence-specific DNA binding;GO:0001102//RNA polymerase II activating transcription factor binding;GO:0001223//transcription coact…	GO:0000122//negative regulation of transcription by RNA polymerase II;GO:0001501//skeletal system development;GO:0001649//osteoblast differentiation;GO:0001657//ureteric bud development;GO:0001666//response to hypoxia;GO:0001701//in utero embryonic development;GO:0001707//mesoderm formation;GO:0001756//somitogenesis;GO:0001889//liver development;GO:0001947//heart looping;GO:0002076//osteoblast de…
MergePeak_7538	20	10896944	10897411	0.0476	1	43	15	33	25	16	15	1.68	1.01	3.54	1.26	0.7	0.96	2.08	0.97	-1.10053	Intron (ENSBGRT00000034312/ENSBGRG00000018263, intron 9 of 9)	10880903	10984383	103481	-	ENSBGRG00000018263	ENSBGRT00000034312	10880903	10984383	103481	-	ENSBGRG00000018263	ENSBGRT00000034312	87206	NFATC3	nuclear factor of activated T cells 3 [Source:HGNC Symbol;Acc:HGNC:7777]	Human Diseases;Environmental Information Processing;Human Diseases;Human Diseases;Human Diseases;Human Diseases;Organismal Systems;Environmental Information Processing;Organismal Systems;Human Diseases;Environmental Information Processing;Cellular Processes;Organismal Systems;Organismal Systems;Organismal Systems;Human Diseases;Organismal Systems;Organismal Systems	Infectious diseases;Signal transduction;Infectious disease: viral;Infectious diseases;Infectious diseases;Infectious disease: bacterial;Development;Signal transduction;Immune system;Infectious diseases;Signal transduction;Cell growth and death;Immune system;Immune system;Endocrine system;Cancer: overview;Immune system;Immune system	ko05166//HTLV-I infection;ko04010//MAPK signaling pathway;ko05170//Human immunodeficiency virus 1 infection;ko05163//Human cytomegalovirus infection;ko05167//Kaposi sarcoma-associated herpesvirus infection;ko05135//Yersinia infection;ko04360//Axon guidance;ko04022//cGMP - PKG signaling pathway;ko04659//Th17 cell differentiation;ko05161//Hepatitis B;ko04310//Wnt signaling pathway;ko04218//Cellular…	K17333;K17333;K17333;K17333;K17333;K17333;K17333;K17333;K17333;K17333;K17333;K17333;K17333;K17333;K17333;K17333;K17333;K17333	GO:0005634//nucleus;GO:0005654//nucleoplasm;GO:0005737//cytoplasm;GO:0005829//cytosol	GO:0000978//RNA polymerase II proximal promoter sequence-specific DNA binding;GO:0001227//DNA-binding transcription repressor activity, RNA polymerase II-specific;GO:0001228//DNA-binding transcription activator activity, RNA polymerase II-specific;GO:0003677//DNA binding;GO:0003700//DNA-binding transcription factor activity	GO:0006355//regulation of transcription, DNA-templated;GO:0045944//positive regulation of transcription by RNA polymerase II;GO:1902894//negative regulation of pri-miRNA transcription by RNA polymerase II;GO:1905064//negative regulation of vascular smooth muscle cell differentiation
MergePeak_4083	15	18638202	18638432	0.0478	1	25	20	16	10	13	11	1.98	2.72	3.48	1.02	1.15	1.43	2.73	1.2	-1.18587	Intron (ENSBGRT00000014367/ENSBGRG00000005083, intron 2 of 33)	18604520	18740705	136186	+	ENSBGRG00000005083	ENSBGRT00000014367	18604520	18740705	136186	+	ENSBGRG00000005083	ENSBGRT00000014367	33797	COL4A2	collagen type IV alpha 2 chain [Source:HGNC Symbol;Acc:HGNC:2203]	Human Diseases;Environmental Information Processing;Human Diseases;Cellular Processes;Organismal Systems;Human Diseases;Organismal Systems;Human Diseases;Human Diseases;Environmental Information Processing	Cancers;Signal transduction;Infectious diseases;Cellular community - eukaryotes;Endocrine system;Infectious diseases;Digestive system;Cancers;Endocrine and metabolic diseases;Signaling molecules and interaction	ko05200//Pathways in cancer;ko04151//PI3K-Akt signaling pathway;ko05165//Human papillomavirus infection;ko04510//Focal adhesion;ko04926//Relaxin signaling pathway;ko05146//Amoebiasis;ko04974//Protein digestion and absorption;ko05222//Small cell lung cancer;ko04933//AGE-RAGE signaling pathway in diabetic complications;ko04512//ECM-receptor interaction	K06237;K06237;K06237;K06237;K06237;K06237;K06237;K06237;K06237;K06237	GO:0005581//collagen trimer;GO:0005587//collagen type IV trimer;GO:0005604//basement membrane	GO:0005201//extracellular matrix structural constituent	GO:0006351//transcription, DNA-templated;GO:0016525//negative regulation of angiogenesis;GO:0035987//endodermal cell differentiation;GO:0038063//collagen-activated tyrosine kinase receptor signaling pathway;GO:0071560//cellular response to transforming growth factor beta stimulus
MergePeak_15439	8	21373291	21373505	0.0483	1	42	14	19	12	6	18	3.58	2.05	4.44	1.32	0.57	2.52	3.36	1.47	-1.19264	Promoter (<=1kb)	21373515	21426141	52627	+	ENSBGRG00000020521	ENSBGRT00000037758	21373515	21426141	52627	+	ENSBGRG00000020521	ENSBGRT00000037758	-117	PIP5K1C	phosphatidylinositol-4-phosphate 5-kinase type 1 gamma [Source:HGNC Symbol;Acc:HGNC:8996]	Metabolism;Cellular Processes;Cellular Processes;Human Diseases;Environmental Information Processing;Organismal Systems;Environmental Information Processing;Human Diseases;Metabolism	Global and overview maps;Transport and catabolism;Cell motility;Infectious disease: bacterial;Signal transduction;Immune system;Signal transduction;Cancers;Carbohydrate metabolism	ko01100//Metabolic pathways;ko04144//Endocytosis;ko04810//Regulation of actin cytoskeleton;ko05135//Yersinia infection;ko04072//Phospholipase D signaling pathway;ko04666//Fc gamma R-mediated phagocytosis;ko04070//Phosphatidylinositol signaling system;ko05231//Choline metabolism in cancer;ko00562//Inositol phosphate metabolism	K00889;K00889;K00889;K00889;K00889;K00889;K00889;K00889;K00889	GO:0005654//nucleoplasm;GO:0005829//cytosol;GO:0010008//endosome membrane	GO:0016307//phosphatidylinositol phosphate kinase activity	GO:0046488//phosphatidylinositol metabolic process
MergePeak_14201	6	103057232	103057495	0.0494	1	37	22	22	7	16	22	2.57	2.62	4.19	0.63	1.24	2.51	3.13	1.46	-1.10019	Intron (ENSBGRT00000005079/ENSBGRG00000002633, intron 2 of 7)	102889913	103253876	363964	-	ENSBGRG00000002633	ENSBGRT00000005079	102889913	103253876	363964	-	ENSBGRG00000002633	ENSBGRT00000005079	196513	PPP3CA	protein phosphatase 3 catalytic subunit alpha [Source:HGNC Symbol;Acc:HGNC:9314]	Human Diseases;Human Diseases;Environmental Information Processing;Human Diseases;Environmental Information Processing;Human Diseases;Human Diseases;Human Diseases;Organismal Systems;Environmental Information Processing;Organismal Systems;Environmental Information Processing;Cellular Processes;Organismal Systems;Organismal Systems;Organismal Systems;Human Diseases;Organismal Systems;Cellular Proc…	Neurodegenerative diseases;Infectious diseases;Signal transduction;Infectious disease: viral;Signal transduction;Infectious diseases;Infectious diseases;Infectious diseases;Development;Signal transduction;Immune system;Signal transduction;Cell growth and death;Immune system;Immune system;Endocrine system;Cancer: overview;Nervous system;Cell growth and death;Immune system;Development;Nervous syste…	ko05010//Alzheimer disease;ko05166//HTLV-I infection;ko04010//MAPK signaling pathway;ko05170//Human immunodeficiency virus 1 infection;ko04020//Calcium signaling pathway;ko05163//Human cytomegalovirus infection;ko05152//Tuberculosis;ko05167//Kaposi sarcoma-associated herpesvirus infection;ko04360//Axon guidance;ko04022//cGMP - PKG signaling pathway;ko04659//Th17 cell differentiation;ko04310//Wnt …	K04348;K04348;K04348;K04348;K04348;K04348;K04348;K04348;K04348;K04348;K04348;K04348;K04348;K04348;K04348;K04348;K04348;K04348;K04348;K04348;K04348;K04348;K04348;K04348;K04348;K04348;K04348;K04348;K04348;K04348	GO:0005634//nucleus;GO:0005654//nucleoplasm;GO:0005737//cytoplasm;GO:0005739//mitochondrion;GO:0005829//cytosol;GO:0005886//plasma membrane;GO:0005955//calcineurin complex;GO:0009898//cytoplasmic side of plasma membrane;GO:0030018//Z disc;GO:0043197//dendritic spine;GO:0098685//Schaffer collateral - CA1 synapse;GO:0098978//glutamatergic synapse	GO:0004721//phosphoprotein phosphatase activity;GO:0004722//protein serine/threonine phosphatase activity;GO:0005516//calmodulin binding;GO:0008144//drug binding;GO:0016018//cyclosporin A binding;GO:0016787//hydrolase activity;GO:0019899//enzyme binding;GO:0033192//calmodulin-dependent protein phosphatase activity;GO:0046983//protein dimerization activity;GO:0051117//ATPase binding	GO:0000082//G1/S transition of mitotic cell cycle;GO:0006470//protein dephosphorylation;GO:0006606//protein import into nucleus;GO:0006816//calcium ion transport;GO:0010613//positive regulation of cardiac muscle hypertrophy;GO:0010628//positive regulation of gene expression;GO:0010629//negative regulation of gene expression;GO:0014883//transition between fast and slow fiber;GO:0014898//cardiac mu…
