# Supplementary material for: The Landscape of Accessible Chromatin during Yak Adipocyte Differentiation
Source: Int J Mol Sci. 2022 Sep 1;23(17):9960. doi: 10.3390/ijms23179960 (PMC9456067; doi:10.3390/ijms23179960)
Supplement: Supplementary file 1 [file ijms-23-09960-s001.zip › Supplementary Table S7.xls]

motif_ID	TF	consensus	E-value	TP	%TP	FP	%FP
MA0478.1	FOSL2	KRRTGASTCAB	1.56E-26	80	20.94	23	2.01
MA0491.1	JUND	DRTGASTCATS	3.28E-26	71	18.59	15	1.31
MA0477.1	FOSL1	RRTGASTCAKV	2.41E-24	69	18.06	16	1.4
MA0476.1	FOS	DVTGASTCATB	3.85E-23	66	17.28	15	1.31
MA0490.1	JUNB	NRRTGASTCAK	1.30E-22	72	18.85	22	1.92
MA1101.1	BACH2	NMTGACTCAGCANH	7.75E-17	96	25.13	70	6.11
MA0655.1	JDP2	ATGACTCAT	3.10E-12	59	15.45	31	2.71
MA1121.1	TEAD2	NYACATTCCWNNS	3.92E-10	101	26.44	108	9.42
MA0090.2	TEAD1	YRCATTCCWH	4.11E-08	97	25.39	111	9.69
MA0599.1	KLF5	GCCCCDCCCH	4.81E-08	35	9.16	11	0.96
MA0516.1	SP2	GYCCCGCCYCYBSSS	9.54E-08	61	15.97	47	4.1
MA0685.1	SP4	BWRGCCACGCCCMCTYH	5.34E-07	34	8.9	14	1.22
MA0808.1	TEAD3	RCATTCCW	6.78E-07	64	16.75	57	4.97
MA0841.1	NFE2	VATGACTCATS	8.29E-07	23	6.02	4	0.35
MA0809.1	TEAD4	NRCATTCCWN	1.45E-06	76	19.9	79	6.89
MA0150.2	Nfe2l2	CASNATGACTCAGCA	1.95E-06	42	10.99	25	2.18
MA0079.3	SP1	GCCCCKCCCCC	1.10E-05	142	37.17	230	20.07
MA0740.1	KLF14	KRCCACGCCCMCYT	1.16E-05	59	15.45	55	4.8
MA0742.1	Klf12	GRCCACGCCCWHHWH	1.27E-05	43	11.26	30	2.62
MA0493.1	Klf1	RRCCACACCCW	1.39E-05	83	21.73	100	8.73
MA0139.1	CTCF	YGRCCASYAGRKGGCRSYR	1.47E-05	22	5.76	4	0.35
MA0502.1	NFYB	VMMYBRRCCAATCAG	1.30E-04	25	6.54	9	0.79
MA0746.1	SP3	VCCACGCCCMC	5.11E-04	81	21.2	104	9.08
MA0002.2	RUNX1	BBYTGTGGTTT	1.27E-03	35	9.16	23	2.01
MA0060.3	NFYA	RRCCAATCAGM	1.88E-03	28	7.33	15	1.31
MA0511.2	RUNX2	WAACCGCAA	4.27E-03	30	7.85	19	1.66
