# Supplementary material for: The Landscape of Accessible Chromatin during Yak Adipocyte Differentiation
Source: Int J Mol Sci. 2022 Sep 1;23(17):9960. doi: 10.3390/ijms23179960 (PMC9456067; doi:10.3390/ijms23179960)
Supplement: Supplementary file 1 [file ijms-23-09960-s001.zip › Supplementary Table S8.xlsx]

## Sheet: Sheet1
TF	E-value	Pread_mean	Ad_mean	log2(fc)	P	FDR
FOSL2	1.56e-26	25.9233	46.2367	0.834786	7.43545e-15	2.87305e-13
JUND	3.28e-26	11.13	12.8233	0.204318	0.630128	0.861529
FOS	3.85e-23	43.76	44.0867	0.0107297	0.323858	0.613881
JUNB	1.3e-22	41.34	71.78	0.796044	2.98312e-14	1.10095e-12
JDP2	3.1e-12	15.1433	22.2967	0.558145	0.0105972	0.0483067
TEAD2	3.92e-10	10.6833	10.6667	-0.00225245	0.471573	0.748898
TEAD1	4.1e-08	11.03	2.37	-2.21847	2.55474e-08	4.43919e-07
TEAD3	6.78e-07	39.16	38.9067	-0.00936338	0.147135	0.366817
TEAD4	1.45e-06	8.54333	7.28	-0.230861	0.0302065	0.112417
Nfe2l2	1.95e-06	133.28	135.683	0.0257832	0.220054	0.483483
SP1	1.1e-05	8.75	11.6133	0.408427	0.01392	0.0605304
CTCF	1.47e-05	13.7133	20.8367	0.603545	2.04354e-06	2.55214e-05
NFYB	0.00013	5.15333	5.64667	0.131894	0.928869	0.975536
SP3	0.000511	18.7167	23.96	0.356304	0.00970701	0.0448287
RUNX1	0.00127	10.7433	14.72	0.454336	0.00239133	0.0139068
NFYA	0.00188	4.61	5.47667	0.248531	0.646941	0.864724
RUNX2	0.00427	9.94	17.36	0.804449	1.69158e-06	2.13262e-05
